# Supplementary material for: Stigma and Discrimination Towards HIV in Healthcare Workers in Shenzhen, China
Source: Research Square preprint supplement (doi:10.21203/rs.3.rs-124831/v1), 2020-12-28
Supplement: Supplementary file 1 [file 4b0affc1c64d335081e17270.pdf]

# Title: Health Facility Staff Questionnaire \*: Achieving a Stigma-free Health Facility and HIV Services (Resources for Administrators)

Dara Carr<sup>1</sup>, Ross Kidd<sup>1</sup>, Molly Fitzgerald<sup>1</sup>, and Laura Nyblade<sup>1\*</sup>

1. Washington, DC: Futures Group, Health Policy Project.

\* Corresponding author: Laura Nyblade, Health Policy Project and RTI International, 701 13th St., NW, Suite 750, Washington, DC 20005, USA. Tel: 1-202-728-1961. (l.nyblade@rti.org)

\*: 1 The detailed design of the questionnaire can be achieved from the reference[1].

2 The raw questionnaire can be achieved from the reference[2]

For more information, contact:

Health Policy Project

Futures Group

1331 Pennsylvania Ave NW, Suite 600

Washington, DC 20004

Tel: (202) 775-9680

Fax: (202) 775-9694

Email: [policyinfo@futuresgroup.com](mailto:policyinfo@futuresgroup.com)

[www.healthpolicyproject.com](http://www.healthpolicyproject.com)

# Health Facility Staff Questionnaire

Code.....

Interview Date: \_\_\_\_\_ 2014

## Section 1: Background Information

*First we will ask about your background.*

1. How old were you at your last birthday? \_\_\_\_\_ years

2. What is your sex?

Female     Male

3. What is your marital status?

Unmarried     Married     Divorced     Remarried     Widowed

4. What is your education?

High school or others     Diploma     Bachelor     Master or higher

5. What is your professional title rank?

None     Primary     Intermediate     Senior

6. What is the attribute of your hospital?

Governmental     Private

7. The hospital where you are working is \_\_\_\_\_?

8. What is your current job?

*ADJUST as appropriate for COUNTRY context by adding or deleting categories according to sample.*

Accountant     Cashier     Cleaning staff     Clinical Officer     Dentist

Public health care physician     Doctor     Nurse     Anesthetist

Medical / Laboratory Technician     Midwife     Obstetrician and Gynecologist

Nursing worker     Pharmacist     Receptionist     Security Guard

- Ward Attendant    Medical Records Personnel    Health Educator    Other

9. How many years have you worked in healthcare? \_\_\_\_\_ years

10. Have you ever worked in a clinic/hospital/department that specialized in HIV care and treatment?

- Yes    No

11. In the past 12 months, approximately how many HIV-positive patients did you provide with care or services?

- 0    1-5    6-10    ≥11

12. Did you ever receive training in the following subjects? (Check all that apply.)

- a. HIV stigma and discrimination    Yes    No
- b. Infection control and universal precautions (including post-exposure prophylaxis)    Yes    No
- c. Patients' informed consent, privacy, and confidentiality    Yes    No
- d. Key population stigma and discrimination    Yes    No
- e. No training    Yes    No

## Section 2: Infection Control

*Now we will ask you about infection concerns in your health facility.*

13. How worried would you be about getting HIV if you did the following?

*If any of the following is not one of YOUR job responsibilities, please select "Not applicable."*

a. Touched the clothing of a patient living with HIV

- Not worried    A little worried    Worried    Very worried    Not applicable

b. Dressed the wounds of a patient living with HIV

- Not worried    A little worried    Worried    Very worried    Not applicable

c. Drew blood from a patient living with HIV

- Not worried    A little worried    Worried    Very worried    Not applicable

d. Took the temperature of a patient living with HIV

- Not worried    A little worried    Worried    Very worried    Not applicable

14. Do you typically use any of the following measures when providing care or services for a patient living with HIV?

a. Avoid physical contact

- Yes     No     Not applicable

b. Wear double gloves

- Yes     No     Not applicable

c. Wear gloves during all aspects of the patient's care

- Yes     No     Not applicable

d. Use any special infection-control measures with patients living with HIV that you do not use with other patients

- Yes     No     Not applicable

### Section 3: Health Facility Environment

*Now we will ask about practices in your health facility and your experiences working in a facility that provides care to people living with HIV.*

15. In the past 12 months have you seen a person living with HIV in your health facility?

- Yes (*Go to QUESTION 16*)  
 No (*Skip to QUESTION 17*)  
 Don't know (*Skip to QUESTION 17*)

16. In the past 12 months, how often have you observed the following in your health facility?

a. Healthcare workers unwilling to care for a patient living with or thought to be living with HIV

- Never     Once or twice     Several times     Most of the time

b. Healthcare workers providing poorer quality of care to a patient living with or thought to be living with HIV, relative to other patients

- Never     Once or twice     Several times     Most of the time

c. Healthcare workers talking badly about people living with or thought to be living with HIV

- Never     Once or twice     Several times     Most of the time

17. How worried are you about

a. People talking badly about you because you care for patients living with HIV?

- Not worried       A little worried       Worried       Very worried       Not applicable

b. Friends and family avoiding you because you care for patients living with HIV?

- Not worried       A little worried       Worried       Very worried       Not applicable

c. Colleagues avoiding you because of your work caring for patients living with HIV?

- Not worried       A little worried       Worried       Very worried       Not applicable

18. How hesitant are healthcare workers in this facility to work alongside a coworker living with HIV, regardless of their duties?

- Not hesitant       A little hesitant       Somewhat hesitant       Very hesitant

## Section 4: Health Facility Policies

*Now we are going to ask about the institutional policy and work environment in your facility.*

19. In my facility it is not acceptable to test a patient for HIV without their knowledge.

- Strongly Agree       Agree       Disagree       Strongly Disagree

20. I will get in trouble at work if I discriminate against patients living with HIV.

- Yes       No       Don't Know

21. Do you strongly agree, agree, disagree, or strongly disagree with the following statements?

a. There are adequate supplies in my health facility that reduce my risk of becoming infected with HIV.

- Strongly Agree       Agree       Disagree       Strongly Disagree

b. There are standardized procedures/protocols in my health facility that reduce my risk of becoming infected with HIV.

- Strongly Agree       Agree       Disagree       Strongly Disagree

22. My health facility has written guidelines to protect patients living with HIV from discrimination.

- Yes       No       Don't Know

## Section 5: Opinions About People Living With HIV

*Now we are going to ask about opinions related to people living with HIV.*

23. Do you strongly agree, agree, disagree, or strongly disagree with the following statements?

a. Most people living with HIV do not care if they infect other people.

Strongly Agree  Agree  Disagree  Strongly Disagree

b. People living with HIV should feel ashamed of themselves.

Strongly Agree  Agree  Disagree  Strongly Disagree

c. Most people living with HIV have had many sexual partners.

Strongly Agree  Agree  Disagree  Strongly Disagree

d. People get infected with HIV because they engage in irresponsible behaviors.

Strongly Agree  Agree  Disagree  Strongly Disagree

e. HIV is punishment for bad behavior.

Strongly Agree  Agree  Disagree  Strongly Disagree

24. Women living with HIV should be allowed to have babies if they wish.

Strongly Agree  Agree  Disagree  Strongly Disagree

25. Should people living with HIV only seek care from these special hospitals?

Strongly Agree  Agree  Disagree  Strongly Disagree

26. Please tell us if you strongly agree, agree, disagree, or strongly disagree with the following statement:

a. If I had a choice, I would prefer not to provide services to people who inject illegal drugs.

Strongly Agree (*Go to QUESTION 26b*)

Agree (*Go to QUESTION 26b*)

Disagree (*Skip to QUESTION 27*)

Strongly Disagree (*Skip to QUESTION 27*)

b. I prefer not to provide services to people who inject illegal drugs because (*check all reasons that apply*)

- i. They put me at higher risk for disease.  Agree  Disagree
- ii. This group engages in immoral behavior.  Agree  Disagree
- iii. I have not received training to work with this group.  Agree  Disagree

27. Please tell us if you strongly agree, agree, disagree, or strongly disagree with the following statement:

a. If I had a choice, I would prefer not to provide services to men who have sex with men.

- Strongly Agree (*Go to QUESTION 27b*)
- Agree (*Go to QUESTION 27b*)
- Disagree (*Skip to QUESTION 28*)
- Strongly Disagree (*Skip to QUESTION 28*)

b. I prefer not to provide services to men who have sex with men because (*check all reasons that apply*)

- i. They put me at higher risk for disease.  Agree  Disagree
- ii. This group engages in immoral behavior.  Agree  Disagree
- iii. I have not received training to work with this group.  Agree  Disagree

28. Please tell us if you strongly agree, agree, disagree, or strongly disagree with the following statement:

a. If I had a choice, I would prefer not to provide services to sex workers (*specify: male or female or both, depending on context*).

- Strongly Agree (*Go to QUESTION 28b*)
- Agree (*Go to QUESTION 28b*)
- Disagree (*Skip to QUESTION 29*)
- Strongly Disagree (*Skip to QUESTION 29*)

b. I prefer not to provide services to sex workers because (*check all reasons that apply*)

- i. They put me at higher risk for disease.  Agree  Disagree
- ii. This group engages in immoral behavior.  Agree  Disagree

iii. I have not received training to work with  
this group.

Agree

Disagree

29. Would you work with pregnant women in antenatal care, prevention of mother-to-child transmission of HIV, or in labor and delivery rooms ?

*If you do not work in one of these areas, please select "No"*

Yes (Go to QUESTION 30)

No (Skip to completion)



## Additional module: stigma towards pregnant women living with HIV among facility staff who care for pregnant women.

*The following section is to be completed by service providers who work with pregnant women in antenatal care, prevention of mother-to-child transmission of HIV, and in labor and delivery rooms. If you do not work in one of these areas, you have completed the questionnaire.*

30. How worried are you about assisting in labor and delivery if the woman is living with HIV?

- Not worried     A little worried     Worried     Very worried     Not applicable

31. In the past 12 months, how often have you observed other healthcare providers

a. Performing an HIV test on a pregnant woman without her informed consent?

- Never     Once or twice     Several times     Most of the time

b. Neglecting a woman living with HIV during labor and delivery because of her HIV status?

- Never     Once or twice     Several times     Most of the time

c. Using additional infection-control procedures (e.g., double gloves) with a pregnant woman living with HIV during labor and delivery because of her HIV status?

- Never     Once or twice     Several times     Most of the time

d. Disclosing the status of a pregnant woman living with HIV to others without her consent?

- Never     Once or twice     Several times     Most of the time

e. Making HIV treatment for a woman living with HIV conditional on her use of family planning methods?

- Never     Once or twice     Several times     Most of the time

32. Do you strongly agree, agree, disagree, or strongly disagree with the following statements?

a. If a pregnant woman is HIV positive, her family has a right to know.

- Strongly Agree     Agree     Disagree     Strongly Disagree

b. Pregnant women who refuse HIV testing are irresponsible.

- Strongly Agree     Agree     Disagree     Strongly Disagree

c. Women living with HIV should not get pregnant if they already have children.

- Strongly Agree     Agree     Disagree     Strongly Disagree

d. It can be appropriate to sterilize a woman living with HIV, even if this is not her choice.

- Strongly Agree     Agree     Disagree     Strongly Disagree

**Reference:**

1. Nyblade L, Jain A, Benkirane M, Li L, Lohiniva A-L, McLean R, Turan JM, Varas-Díaz N, Cintrón-Bou F, Guan J *et al*: **A brief, standardized tool for measuring HIV-related stigma among health facility staff: results of field testing in China, Dominica, Egypt, Kenya, Puerto Rico and St. Christopher & Nevis.** *Journal of the International AIDS Society* 2013, **16**(3 Suppl 2):18718-18718.
2. Carr D, R. Kidd, M. Fitzgerald, and L. Nyblade. : **Acheiving a Stigma-free Health Facility and HIV Services: Resources for Administrators.** . *Washington, DC: Health Policy Project* 2015.
