# Supplementary material for: Stigma and Discrimination Towards HIV in Healthcare Workers in Shenzhen, China
Source: Research Square preprint supplement (doi:10.21203/rs.3.rs-124831/v1), 2020-12-28
Supplement: Supplementary file 2 [file 4c5c5831223d0e33b45da903.xlsx]

## Sheet: Raw date
N0.	Question1	Question2	Question3	Question4	Question5	Question6	Question7	Question8	Question9	Question10	Question11	Question12					Question13				Question14				Question15	Question16			Question17			Question18	Question19	Question20	Question21 19		Question22	Question23					Question24	Question25	Question26				Question27
编号		性别	婚姻									Qa	Qb	Qc	Qd	Qe	Qa	Qb	Qc	Qd	Qa	Qb	Qc	Qd		Qa	Qb	Qc	Qa	Qb	Qc				Qa	Qb		Qa	Qb	Qc	Qd	Qe			Qa	Qbⅰ	Qbⅱ	Qbⅲ	Qa
762	42	Male	Unmarried	Master or higher	Senior	Governmental	Baoan District People's Hospital	Doctor	3	No	1-5	No	Yes	Yes	No	No	A little worried	Not worried	Not worried	Not worried	No	No	No	No	Yes	Never	Never	Never	Not worried	Not worried	Not worried	Not hesitant	Strongly Agree	No	Strongly Agree	Strongly Agree	No	Disagree	Disagree	Agree	Agree	Disagree	Disagree	Agree	Disagree				Disagree
898	46	Male	Unmarried	High school or others	Primary	Governmental	Baoan District People's Hospital	Cleaning staff	2	No	0	No	No	No	No	Yes	Worried	Not applicable	Not applicable	Not applicable	Yes	Yes	Yes	Yes	Don’t know							Somewhat hesitant	Agree	No	Agree	Agree	No	Disagree	Disagree	Strongly Disagree	Strongly Disagree	Disagree	Disagree	Agree	Strongly Disagree				Disagree
995	57	Male	Unmarried	Master or higher	Senior	Governmental	Baoan District People's Hospital	Doctor	4	No		No	Yes	Yes	No	No	Not worried	Not worried	Not applicable	Not worried	Not applicable	Not applicable	Not applicable	Yes	No							A little hesitant	Agree	Don’t Know	Strongly Agree	Strongly Agree	No	Disagree	Disagree	Disagree	Disagree	Disagree	Agree	Agree	Strongly Agree	Agree	Agree	Agree	Agree
825	40	Male	Unmarried	Master or higher	Intermediate	Governmental	Baoan District People's Hospital	Anesthetist	3	No	1-5	Yes	Yes	Yes	Yes	No	Not worried	Not applicable	A little worried	Not worried	No	No	Yes	Yes	Yes	Never	Never	Never	Not worried	Not worried	Not worried	Not hesitant	Disagree	Don’t Know	Strongly Agree	Strongly Agree	Yes	Disagree	Strongly Disagree	Strongly Disagree	Strongly Disagree	Strongly Disagree	Disagree	Agree	Disagree				Disagree
863	24	Female	Married	Diploma	Primary	Governmental	Baoan District People's Hospital	Nurse	1	Yes	0	No	Yes	Yes	No	No	A little worried	A little worried	Worried	A little worried	No	Yes	Yes	Yes	Yes	Never	Never	Never	Not worried	Not worried	Not worried	Not hesitant	Strongly Agree	No	Strongly Agree	Strongly Agree	Yes	Disagree	Disagree	Disagree	Disagree	Disagree	Agree	Agree	Disagree				Disagree
815	26	Female	Married	Diploma	Primary	Governmental	Baoan District People's Hospital	Nurse	2	No	1-5	No	Yes	No	No	No	Very worried	Very worried	Very worried	Not worried	Yes	Yes	Yes	Yes	Yes	Never	Never	Never	Not worried	Not worried	Not worried	A little hesitant	Agree	Don’t Know	Strongly Agree	Strongly Agree	Don’t Know	Agree	Disagree	Disagree	Disagree	Disagree	Strongly Agree	Strongly Agree	Disagree				Disagree
869	38	Female	Married	Bachelor	Intermediate	Governmental	Baoan District People's Hospital	Nurse	3	No		No	Yes	Yes	No	No	Very worried	Very worried	Very worried	Not worried	No	No	Yes	No	Yes	Never	Never	Never	Not worried	Not worried	Not worried	A little hesitant	Disagree	Yes	Strongly Agree	Strongly Agree	Don’t Know	Agree	Disagree	Strongly Disagree	Disagree	Disagree	Agree	Agree	Agree	Agree	Agree	Disagree	Disagree
883	34	Female	Unmarried	Bachelor	Intermediate	Governmental	Baoan District People's Hospital	Nurse	3	Yes	0	Yes	Yes	Yes	Yes	No	A little worried	A little worried	A little worried	A little worried	Yes	Yes	Yes	Yes	Don’t know							Not hesitant	Strongly Agree	Yes	Strongly Agree	Strongly Agree	Yes	Disagree	Disagree	Strongly Disagree	Strongly Disagree	Strongly Disagree	Disagree	Agree	Strongly Disagree				Strongly Disagree
882	47	Male	Divorced	High school or others	Primary	Governmental	Baoan District People's Hospital	Cleaning staff	1	No		No	No	No	No	Yes	A little worried	Worried	Not applicable	Not worried	No	Yes	Yes	Yes	Don’t know							A little hesitant	Disagree	Yes	Strongly Agree	Strongly Agree	Yes	Agree	Disagree	Strongly Disagree	Agree	Strongly Disagree	Strongly Agree	Agree	Strongly Disagree				Strongly Disagree
810	48	Female	Unmarried	Diploma	None	Governmental	Baoan District People's Hospital	Nurse	4	No	1-5	No	Yes	Yes	No	No	A little worried	Not applicable	Not applicable	Not worried	Yes	No	No	No	Yes	Never	Never	Never	Not worried	Not worried	Not worried	A little hesitant	Agree	Don’t Know	Strongly Agree	Strongly Agree	Yes	Agree	Agree	Agree	Agree	Disagree	Disagree	Agree	Agree	Disagree	Disagree	Agree	Agree
911	45	Female	Unmarried	Bachelor	Senior	Governmental	Baoan District People's Hospital	Obstetrician and Gynecologist	4	No	0	Yes	Yes	Yes	Yes	No	A little worried	A little worried	A little worried	Not worried	No	No	No	No	Don’t know							A little hesitant	Strongly Agree	Yes	Strongly Agree	Strongly Agree	Yes	Disagree	Strongly Disagree	Strongly Disagree	Strongly Disagree	Strongly Disagree	Strongly Disagree	Strongly Disagree	Strongly Disagree				Strongly Disagree
857	34	Female	Unmarried	Bachelor	Intermediate	Governmental	Baoan District People's Hospital	Nurse	3	Yes	1-5	No	Yes	Yes	No	No	A little worried	A little worried	Worried	Not worried	No	Yes	Yes	Yes	Yes	Once or twice	Once or twice	Never	Not worried	Not worried	Not worried	A little hesitant	Agree	No	Strongly Agree	Strongly Agree	Don’t Know	Disagree	Disagree	Agree	Agree	Agree	Agree	Strongly Agree	Agree	Agree	Disagree	Disagree	Disagree
840	36	Female	Unmarried	Diploma	Primary	Governmental	Baoan District People's Hospital	Nurse	3	No	0	No	Yes	No	No	No	Not worried	A little worried	A little worried	Not worried	No	Yes	No	Yes	No							A little hesitant	Strongly Agree	No	Strongly Agree	Strongly Agree	Yes	Disagree	Disagree	Disagree	Disagree	Disagree	Agree	Strongly Agree	Agree	Agree	Disagree	Disagree	Disagree
858	33	Female	Married	Bachelor	Primary	Governmental	Baoan District People's Hospital	Nurse	3	No	≥11	No	Yes	No	No	No	Not worried	Worried	A little worried	Not worried	Yes	Yes	No	Yes	No							A little hesitant	Strongly Agree	Yes	Strongly Agree	Strongly Agree	Yes	Strongly Agree	Disagree	Agree	Agree	Agree	Agree	Agree	Agree	Agree	Agree	Disagree	Agree
819	49	Female	Unmarried	Diploma	Primary	Governmental	Baoan District People's Hospital	Pharmacist	4	No	0	No	No	No	No	Yes	Not applicable	Not applicable	Not applicable	Not applicable	Not applicable	Not applicable	Not applicable	Not applicable	Don’t know							Not hesitant	Agree	No	Strongly Agree	Strongly Agree	Yes	Disagree	Strongly Disagree	Disagree	Agree	Disagree	Agree	Agree	Disagree				Disagree
969	50	Female	Unmarried	Bachelor	Senior	Governmental	Baoan District People's Hospital	Nurse	4	No		No	Yes	Yes	No	No	Not applicable	A little worried	A little worried	Not worried	Yes	Yes	Yes	Yes	Don’t know							A little hesitant	Disagree	Don’t Know	Strongly Agree	Strongly Agree	Don’t Know	Agree	Disagree	Strongly Disagree	Agree	Disagree	Disagree	Agree	Disagree				Disagree
764	52	Female	Divorced	Diploma	Primary	Governmental	Baoan District People's Hospital	Nurse	4	No		No	Yes	Yes	No	No	A little worried	A little worried	A little worried	Not worried	Yes	No	Yes	Yes	Don’t know							A little hesitant	Agree	Yes	Strongly Agree	Strongly Agree	Yes	Disagree	Disagree	Disagree	Disagree	Disagree	Agree	Agree	Disagree				Disagree
860	34	Female	Unmarried	Bachelor	Primary	Governmental	Baoan District People's Hospital	Cashier	3	No		No	Yes	No	No	No	Not applicable	Not applicable	Not worried	Not applicable	Not applicable	Not applicable	Yes	Yes	Don’t know							Somewhat hesitant	Disagree	Don’t Know	Disagree	Strongly Agree	Yes	Disagree	Disagree	Disagree	Disagree	Disagree	Agree	Agree	Disagree				Disagree
962	38	Female	Unmarried	Bachelor	Intermediate	Governmental	Baoan District People's Hospital	Midwife	3	No		No	Yes	Yes	No	No	Not worried	Worried	Worried	Not worried	No	Yes	Yes	Yes	Yes	Never	Never	Never	Not worried	Not worried	Not worried	A little hesitant	Agree	No	Strongly Agree	Strongly Agree	Yes	Disagree	Disagree	Strongly Disagree	Disagree	Disagree	Agree	Agree	Disagree				Disagree
885	48	Male	Unmarried	Bachelor	Senior	Governmental	Baoan District People's Hospital	Pharmacist	4	No		No	No	No	No	Yes	Not applicable	Not applicable	Not applicable	Not applicable	Not applicable	Not applicable	Not applicable	Not applicable	Don’t know							Somewhat hesitant	Disagree	Don’t Know	Strongly Agree	Strongly Agree	Don’t Know	Agree	Disagree	Disagree	Disagree	Disagree	Agree	Strongly Agree	Disagree				Disagree
970	33	Female	Unmarried	Bachelor	Primary	Governmental	Baoan District People's Hospital	Midwife	2	Yes	1-5	Yes	Yes	Yes	Yes	No	Worried	Worried	Worried	Not worried	No	No	Yes	Yes	Yes	Never	Never	Never	Not worried	Not worried	Not worried	Somewhat hesitant	Strongly Agree	Yes	Strongly Agree	Strongly Agree	Yes	Disagree	Disagree	Disagree	Disagree	Disagree	Agree	Agree	Disagree				Disagree
874	26	Female	Married	Bachelor	Primary	Governmental	Baoan District People's Hospital	Nurse	1	No		No	Yes	Yes	No	No	Worried	Worried	Worried	A little worried	Yes	Yes	Yes	Yes	Yes	Never	Never	Never	Not worried	Not worried	Not worried	A little hesitant	Strongly Agree	Yes	Disagree	Disagree	Don’t Know	Agree	Agree	Agree	Agree	Disagree	Agree	Agree	Disagree				Disagree
828	33	Male	Unmarried	Master or higher	Intermediate	Governmental	Baoan District People's Hospital	Doctor	1	No	0	Yes	No	No	No	No	A little worried	Not worried	Not worried	Not worried	No	No	No	No	Don’t know							A little hesitant	Agree	Yes	Disagree	Strongly Agree	Don’t Know	Agree	Disagree	Agree	Agree	Disagree	Agree	Disagree	Disagree				Disagree
865	31	Female	Unmarried	Diploma	Primary	Governmental	Baoan District People's Hospital	Nurse	2	No	1-5	No	Yes	Yes	Yes	No	Worried	Very worried	Very worried	Not worried	No	Yes	Yes	Yes	Yes	Never	Never	Never	Not worried	Not worried	Not worried	A little hesitant	Agree	Don’t Know	Strongly Agree	Strongly Agree	Don’t Know	Disagree	Disagree	Disagree	Disagree	Strongly Disagree	Agree	Strongly Agree	Disagree				Disagree
972	38	Female	Unmarried	Bachelor	Intermediate	Governmental	Baoan District People's Hospital	Obstetrician and Gynecologist	3	No	0	Yes	Yes	Yes	Yes	No	Not worried	Not worried	A little worried	Not worried	No	No	No	No	Don’t know							A little hesitant	Agree	Yes	Strongly Agree	Strongly Agree	Yes	Disagree	Strongly Disagree	Disagree	Strongly Disagree	Strongly Disagree	Strongly Disagree	Strongly Disagree	Strongly Disagree				Strongly Disagree
846	40	Female	Unmarried	Bachelor	Senior	Governmental	Baoan District People's Hospital	Pharmacist	3	No		No	No	No	No	Yes	Worried	Worried	Worried	Worried	Not applicable	Not applicable	Not applicable	Not applicable	Yes	Never	Never	Never	Not worried	Not worried	Not worried	Somewhat hesitant	Disagree	Don’t Know	Strongly Agree	Strongly Agree	Don’t Know	Agree	Agree	Agree	Agree	Disagree	Disagree	Agree	Strongly Disagree				Strongly Disagree
831	26	Male	Married	Bachelor	Primary	Governmental	Baoan District People's Hospital	Medical /Laboratory Technician	1	Yes	1-5	Yes	Yes	Yes	Yes	No	Not worried	Not worried	A little worried	Not worried	No	Yes	Yes	No	Yes	Never	Never	Never	Not worried	Not worried	Not worried	Not hesitant	Agree	Yes	Strongly Agree	Strongly Agree	Don’t Know	Agree	Disagree	Disagree	Disagree	Disagree	Disagree	Disagree	Disagree				Disagree
848	45	Female	Unmarried	Bachelor	Senior	Governmental	Baoan District People's Hospital	Nurse	4	No		Yes	Yes	Yes	Yes	No	Not worried	A little worried	A little worried	Not worried	No	Yes	No	Yes	Yes	Never	Never	Never	Not worried	Not worried	Not worried	Not hesitant	Strongly Agree	No	Strongly Agree	Strongly Agree	Yes	Agree	Disagree	Agree	Agree	Disagree	Disagree	Strongly Agree	Agree	Agree	Agree	Disagree	Agree
798	40	Female	Married	Bachelor	Intermediate	Governmental	Baoan District People's Hospital	Nurse	4	No	≥11	Yes	Yes	Yes	No	No	Worried	A little worried	Not worried	Not worried	No	Yes	Yes	Yes	Yes	Never	Never	Never	Not worried	Not worried	Not worried	A little hesitant	Agree	Don’t Know	Strongly Agree	Strongly Agree	Don’t Know	Disagree	Disagree	Disagree	Disagree	Disagree	Agree	Agree	Agree	Disagree	Agree	Disagree	Disagree
879	54	Male	Unmarried	Master or higher	Senior	Governmental	Baoan District People's Hospital	Doctor	4	No	0	No	No	No	No	Yes	A little worried	Very worried	A little worried	A little worried	Not applicable	Not applicable	Not applicable	Not applicable	Yes	Once or twice	Once or twice	Once or twice	Very worried	Very worried	Not worried	Somewhat hesitant	Disagree	Don’t Know	Disagree	Strongly Agree	Yes	Disagree	Agree	Agree	Disagree	Disagree	Agree	Strongly Agree	Agree	Agree	Disagree	Agree	Agree
990	22	Male	Married	Bachelor	Primary	Governmental	Baoan District People's Hospital	Medical /Laboratory Technician	1	No		Yes	Yes	Yes	Yes	No	Very worried	Very worried	Worried	Not worried	Not applicable	Yes	Yes	Yes	Yes	Never	Never	Never	A little worried	A little worried	Not worried	Not hesitant	Strongly Agree	Yes	Strongly Agree	Strongly Agree	No	Agree	Agree	Strongly Agree	Agree	Strongly Agree	Agree	Agree	Disagree				Disagree
960	35	Female	Unmarried	Diploma	Intermediate	Governmental	Baoan District People's Hospital	Nurse	3	No	1-5	Yes	Yes	Yes	Yes	No	A little worried	Worried	Very worried	Not worried	Yes	No	No	Yes	Yes	Never	Never	Never	Not worried	Not worried	Not worried	Very hesitant	Agree	Yes	Strongly Agree	Strongly Agree	Don’t Know	Agree	Disagree	Strongly Agree	Disagree	Disagree	Strongly Agree	Strongly Agree	Agree	Agree	Agree	Disagree	Strongly Disagree
816	26	Female	Married	Bachelor	Primary	Governmental	Baoan District People's Hospital	Medical /Laboratory Technician	1	No		No	Yes	Yes	No	No	Not worried	A little worried	Worried	Not worried	No	No	No	Yes	Yes	Never	Never	Never	Not worried	Not worried	Not worried	A little hesitant	Disagree	Don’t Know	Strongly Agree	Strongly Agree	Don’t Know	Disagree	Strongly Disagree	Disagree	Disagree	Disagree	Agree	Agree	Agree	Agree	Agree	Disagree	Disagree
823	29	Male	Unmarried	Bachelor	Intermediate	Governmental	Baoan District People's Hospital	Doctor	2	No	0	No	Yes	Yes	Yes	No	Not worried	Worried	A little worried	Not worried	No	No	No	Yes	Yes	Never	Never	Never	Not worried	Not worried	Not worried	A little hesitant	Strongly Agree	No	Strongly Agree	Strongly Agree	Don’t Know	Agree	Agree	Agree	Agree	Disagree	Disagree	Strongly Agree	Disagree				Disagree
813	25	Female	Married	Bachelor	Primary	Governmental	Baoan District People's Hospital	Nurse	2	No	1-5	No	Yes	Yes	No	No	A little worried	Very worried	Very worried	A little worried	Not applicable	Yes	Yes	Yes	Yes	Once or twice	Once or twice	Never	A little worried	A little worried	Not worried	A little hesitant	Agree	Yes	Strongly Agree	Strongly Agree	Don’t Know	Agree	Disagree	Disagree	Disagree	Disagree	Disagree	Strongly Agree	Disagree				Disagree
841	44	Female	Unmarried	Bachelor	Intermediate	Governmental	Baoan District People's Hospital	Medical /Laboratory Technician	3	No	0	No	Yes	Yes	No	No	Not worried	A little worried	Not applicable	Not applicable	Yes	Yes	Yes	Yes	Don’t know							Not hesitant	Strongly Agree	Yes	Strongly Agree	Strongly Agree	Yes	Disagree	Disagree	Disagree	Disagree	Disagree	Disagree	Agree	Disagree				Disagree
859	22	Female	Married	Diploma	Primary	Governmental	Baoan District People's Hospital	Receptionist	1	No		No	No	No	No	Yes	Worried	Worried	Worried	Worried	Not applicable	Yes	Yes	Yes	Don’t know							A little hesitant	Disagree	Yes	Strongly Agree	Strongly Agree	Yes	Agree	Agree	Strongly Disagree	Agree	Disagree	Agree	Agree	Agree	Agree	Disagree	Disagree	Agree
988	39	Female	Unmarried	Bachelor	Intermediate	Governmental	Baoan District People's Hospital	Midwife	4	No	1-5	Yes	Yes	Yes	No	No	A little worried	A little worried	Very worried	Not worried	Not applicable	No	No	Yes	Don’t know							A little hesitant	Disagree	No	Strongly Agree	Strongly Agree	Yes	Agree	Agree	Agree	Strongly Agree	Disagree	Strongly Agree	Strongly Agree	Strongly Agree	Agree	Agree	Disagree	Disagree
951	60	Female	Unmarried	Bachelor	Intermediate	Governmental	Baoan District People's Hospital	Medical /Laboratory Technician	4	No	0	No	No	No	No	Yes	Not applicable	Not applicable	Not applicable	Worried	Not applicable	Not applicable	Not applicable	Not applicable	Don’t know							Very hesitant	Disagree	Don’t Know	Disagree	Disagree	Don’t Know	Strongly Agree	Strongly Agree	Strongly Agree	Strongly Agree	Strongly Agree	Strongly Agree	Strongly Agree	Agree	Agree	Agree	Agree	Agree
817	32	Female	Unmarried	Bachelor	Primary	Governmental	Baoan District People's Hospital	Nurse	3	No		No	Yes	Yes	No	No	Very worried	Very worried	Very worried	Very worried	Yes	Yes	Yes	Yes	No							Somewhat hesitant	Disagree	Don’t Know	Strongly Agree	Disagree	Don’t Know	Disagree	Disagree	Disagree	Disagree	Disagree	Agree	Agree	Disagree				Disagree
839	38	Male	Unmarried	Bachelor	Intermediate	Governmental	Baoan District People's Hospital	Medical /Laboratory Technician	3	No		No	Yes	Yes	No	No	Not worried	Worried	Not applicable	Not worried	Not applicable	Not applicable	Not applicable	Not applicable	Yes	Never	Never	Never	Not worried	Not worried	Not worried	A little hesitant	Strongly Agree	Yes	Strongly Agree	Strongly Agree	Don’t Know	Disagree	Agree	Disagree	Disagree	Disagree	Strongly Agree	Strongly Agree	Disagree				Disagree
844	46	Male	Unmarried	Bachelor	Intermediate	Governmental	Baoan District People's Hospital	Doctor	4	No		Yes	No	No	No	No	A little worried	A little worried	A little worried	A little worried	No	No	Yes	No	Don’t know							A little hesitant	Strongly Agree	Yes	Disagree	Disagree	Don’t Know	Disagree	Disagree	Disagree	Disagree	Disagree	Agree	Agree	Disagree				Disagree
824	28	Male	Married	Master or higher	Primary	Governmental	Baoan District People's Hospital	Doctor	1	No	1-5	No	Yes	Yes	No	No	Very worried	Worried	Worried	Not worried	Yes	No	Yes	Yes	Yes	Several times	Once or twice	Once or twice	A little worried	A little worried	A little worried	A little hesitant	Agree	Yes	Strongly Agree	Agree	Yes	Strongly Agree	Agree	Agree	Agree	Agree	Disagree	Agree	Agree	Agree	Agree	Agree	Agree
812	35	Female	Divorced	Bachelor	Senior	Governmental	Baoan District People's Hospital	Doctor	3	No	0	No	No	No	No	Yes	Not worried	Worried	Not applicable	Not worried	Not applicable	Not applicable	Not applicable	Not applicable	Don’t know							A little hesitant	Strongly Agree	Don’t Know	Disagree	Strongly Agree	Don’t Know	Disagree	Disagree	Disagree	Disagree	Disagree	Agree	Agree	Agree	Disagree	Disagree	Agree	Disagree
980	42	Female	Unmarried	Bachelor	Intermediate	Governmental	Baoan District People's Hospital	Nurse	3	No	1-5	No	Yes	Yes	No	No	Not worried	A little worried	A little worried	Not worried	No	Yes	Yes	Yes	Don’t know							A little hesitant	Agree	Yes	Strongly Agree	Strongly Agree	No	Agree	Disagree	Disagree	Disagree	Disagree	Disagree	Disagree	Disagree				Disagree
807	32	Male	Married	Master or higher	Primary	Governmental	Baoan District People's Hospital	Doctor	1	No	0	No	Yes	Yes	No	No	Not worried	Very worried	Not applicable	Not applicable	No	No	No	Yes	Yes	Once or twice	Never	Never	Not worried	Not worried	Not worried	Somewhat hesitant	Agree	Don’t Know	Disagree	Strongly Agree	No	Agree	Agree	Disagree	Agree	Disagree	Disagree	Strongly Agree	Disagree				Disagree
867	34	Female	Unmarried	Bachelor	Intermediate	Governmental	Baoan District People's Hospital	Nurse	3	No	1-5	Yes	Yes	Yes	Yes	No	Not worried	A little worried	A little worried	Not worried	Not applicable	Yes	Yes	Yes	Don’t know							A little hesitant	Agree	Don’t Know	Strongly Agree	Disagree	Yes	Agree	Disagree	Disagree	Disagree	Disagree	Agree	Agree	Disagree				Disagree
971	27	Female	Unmarried	Bachelor	Primary	Governmental	Baoan District People's Hospital	Nurse	1	No		No	Yes	Yes	No	No	Not worried	Very worried	Worried	Not worried	No	No	Yes	Yes	Don’t know							Somewhat hesitant	Agree	Don’t Know	Disagree	Strongly Agree	Don’t Know	Strongly Agree	Disagree	Disagree	Disagree	Disagree	Agree	Agree	Agree	Disagree	Disagree	Agree	Disagree
880	35	Female	Unmarried	Bachelor	Intermediate	Governmental	Baoan District People's Hospital	Pharmacist	2	No	0	No	No	No	No	Yes	A little worried	Very worried	Very worried	A little worried	Not applicable	Not applicable	Not applicable	Not applicable	Don’t know							Very hesitant	Disagree	Don’t Know	Disagree	Disagree	Don’t Know	Agree	Disagree	Agree	Agree	Strongly Disagree	Disagree	Strongly Disagree	Strongly Agree	Disagree	Agree	Agree	Agree
923	30	Female	Married	Bachelor	Primary	Governmental	Baoan District People's Hospital	Nurse	1	No		Yes	Yes	Yes	No	No	Not worried	A little worried	A little worried	Not worried	No	No	No	Yes	Yes	Never	Never	Never	Not worried	Not worried	Not worried	Not hesitant	Agree	Yes	Strongly Agree	Strongly Agree	Yes	Disagree	Agree	Disagree	Disagree	Disagree	Agree	Strongly Agree	Agree	Agree	Agree	Agree	Disagree
794	28	Female	Unmarried	Bachelor	Intermediate	Governmental	Baoan District People's Hospital	Nurse	3	No	1-5	No	Yes	Yes	Yes	No	A little worried	Very worried	Very worried	Not worried	Yes	Yes	Yes	Yes	Yes	Once or twice	Once or twice	Never	A little worried	A little worried	Not worried	Somewhat hesitant	Agree	Yes	Strongly Agree	Strongly Agree	No	Strongly Agree	Disagree	Agree	Strongly Agree	Disagree	Disagree	Strongly Agree	Agree	Agree	Disagree	Agree	Agree
833	32	Male	Unmarried	Master or higher	Intermediate	Governmental	Baoan District People's Hospital	Medical /Laboratory Technician	1	No	0	No	Yes	Yes	No	No	Not applicable	Not applicable	Not applicable	Not applicable	Not applicable	Not applicable	Not applicable	Not applicable	Don’t know							A little hesitant	Strongly Agree	Yes	Strongly Agree	Strongly Agree	Yes	Agree	Disagree	Disagree	Agree	Disagree	Disagree	Strongly Agree	Agree	Disagree	Disagree	Agree	Agree
806	23	Female	Married	Bachelor	Primary	Governmental	Baoan District People's Hospital	Nurse	1	No		No	Yes	Yes	No	No	Not worried	A little worried	Very worried	Not worried	No	Yes	Yes	Yes	Yes	Never	Never	Never	Not worried	Not worried	Not worried	A little hesitant	Strongly Agree	Yes	Strongly Agree	Strongly Agree	Don’t Know	Disagree	Agree	Disagree	Disagree	Strongly Disagree	Agree	Strongly Agree	Disagree				Disagree
881	40	Male	Unmarried	Bachelor	Senior	Governmental	Baoan District People's Hospital	Doctor	3	No	≥11	No	Yes	Yes	Yes	No	Not worried	Not worried	Not worried	Not worried	No	Yes	Yes	Yes	No							A little hesitant	Strongly Agree	Yes	Strongly Agree	Strongly Agree	Yes	Disagree	Agree	Strongly Agree	Disagree	Disagree	Agree	Agree	Agree	Agree	Agree	Agree	Disagree
929	30	Female	Married	High school or others	Primary	Governmental	Baoan District People's Hospital	Obstetrician and Gynecologist	1	No	0	No	No	Yes	No	No	A little worried	Not worried	Worried	Not worried	No	Not applicable	Yes	Yes	Yes	Never	Never	Once or twice	Not worried	Worried	Very worried	A little hesitant	Strongly Agree	Yes	Agree	Strongly Agree	No	Agree	Disagree	Agree	Strongly Agree	Agree	Agree	Agree	Agree	Agree	Agree	Disagree	Agree
838	27	Female	Unmarried	Bachelor	Primary	Governmental	Baoan District People's Hospital	Nurse	1	No	1-5	No	Yes	Yes	Yes	No	Worried	Worried	Worried	Worried	Yes	Yes	Yes	Yes	Yes	Never	Never	Never	Not worried	Not worried	Not worried	A little hesitant	Agree	No	Strongly Agree	Strongly Agree	Don’t Know	Agree	Disagree	Disagree	Disagree	Disagree	Strongly Agree	Strongly Agree	Agree	Agree	Agree	Disagree	Agree
984	22	Female	Married	Bachelor	None	Governmental	Baoan District People's Hospital	Medical /Laboratory Technician	1	No	0	No	No	No	No	Yes	Not worried	A little worried	A little worried	Not worried	No	Yes	Yes	Yes	Yes	Never	Never	Never	Not worried	Not worried	Not worried	Not hesitant	Agree	Yes	Strongly Agree	Strongly Agree	Yes	Disagree	Disagree	Disagree	Disagree	Disagree	Strongly Agree	Disagree	Disagree				Disagree
835	32	Female	Unmarried	Bachelor	Primary	Governmental	Baoan District People's Hospital	Nurse	2	No	1-5	No	Yes	Yes	No	No	Worried	Worried	Worried	A little worried	No	Yes	Yes	Yes	Yes	Never	Never	Never	A little worried	A little worried	Not worried	Somewhat hesitant	Strongly Agree	No	Strongly Agree	Strongly Agree	Yes	Disagree	Disagree	Disagree	Disagree	Disagree	Disagree	Disagree	Disagree				Disagree
955	57	Male	Unmarried	Bachelor	Senior	Governmental	Baoan District People's Hospital	Doctor	4	No	0	Yes	Yes	Yes	No	No	Not worried	Not worried	Not worried	Not worried	No	Yes	Yes	Yes	Yes	Once or twice	Never	Never	Not worried	Not worried	Not worried	Not hesitant	Strongly Agree	Yes	Strongly Agree	Strongly Agree	Yes	Strongly Agree	Agree	Agree	Agree	Agree	Agree	Agree	Agree	Disagree	Agree	Disagree	Agree
873	27	Female	Married	Bachelor	Primary	Governmental	Baoan District People's Hospital	Medical /Laboratory Technician	1	No		No	Yes	Yes	No	Yes	Not applicable	Not applicable	Not applicable	Not applicable	Not applicable	Not applicable	Not applicable	Not applicable	Don’t know							Not hesitant	Disagree	Don’t Know	Disagree	Disagree	Don’t Know	Disagree	Strongly Disagree	Disagree	Disagree	Disagree	Disagree	Agree	Strongly Disagree				Strongly Disagree
872	45	Female	Unmarried	Bachelor	Senior	Governmental	Baoan District People's Hospital	Medical /Laboratory Technician	3	No		No	Yes	Yes	No	No	Not worried	Very worried	A little worried	Not worried	Yes	Yes	Yes	Yes	Don’t know							Somewhat hesitant	Strongly Agree	Yes	Strongly Agree	Strongly Agree	Don’t Know	Disagree	Strongly Agree	Strongly Agree	Agree	Strongly Agree	Strongly Agree	Strongly Agree	Strongly Agree	Agree	Agree	Agree	Strongly Agree
850	27	Female	Married	Master or higher	Intermediate	Governmental	Baoan District People's Hospital	Doctor	1	No		Yes	Yes	Yes	No	No	Not worried	A little worried	Not applicable	Not applicable	No	No	Yes	Yes	Don’t know							A little hesitant	Strongly Agree	Don’t Know	Strongly Agree	Strongly Agree	Yes	Disagree	Disagree	Disagree	Disagree	Disagree	Agree	Strongly Agree	Disagree				Disagree
1073	26	Male	Married	Bachelor	Intermediate	Governmental	Baoan District People's Hospital	Doctor	1	No		No	No	No	No	Yes	Not worried	Very worried	Very worried	Not worried	Not applicable	Yes	Yes	Yes	No							A little hesitant	Agree	No	Strongly Agree	Strongly Agree	Yes	Agree	Strongly Disagree	Disagree	Disagree	Strongly Disagree	Disagree	Strongly Agree	Agree	Agree	Disagree	Disagree	Disagree
827	20	Female	Married	Diploma	None	Governmental	Baoan District People's Hospital	Medical /Laboratory Technician	1	Yes	≥11	Yes	Yes	No	No	No	Worried	Worried	Worried	Worried	Yes	No	No	No	Yes	Never	Never	Never	Not worried	Not worried	Not worried	A little hesitant	Disagree	No	Disagree	Strongly Agree	Yes	Agree	Strongly Disagree	Disagree	Disagree	Disagree	Agree	Agree	Disagree				Disagree
818	34	Female	Married	Master or higher	Intermediate	Governmental	Baoan District People's Hospital	Pharmacist	1	No	0	No	No	Yes	Yes	No	Not applicable	Not applicable	Not applicable	Not applicable	Not applicable	Not applicable	Not applicable	Not applicable	Don’t know							A little hesitant	Disagree	Don’t Know	Disagree	Disagree	Don’t Know	Strongly Agree	Agree	Agree	Agree	Agree	Agree	Strongly Agree	Agree	Agree	Disagree	Agree	Disagree
983	30	Female	Unmarried	Bachelor	Intermediate	Governmental	Baoan District People's Hospital	Obstetrician and Gynecologist	1	No	1-5	Yes	Yes	Yes	Yes	No	Not worried	Worried	Worried	Not worried	No	Yes	Yes	Yes	No							A little hesitant	Strongly Agree	No	Strongly Agree	Strongly Agree	Yes	Disagree	Disagree	Agree	Agree	Disagree	Disagree	Agree	Disagree				Disagree
793	34	Female	Unmarried	Bachelor	Intermediate	Governmental	Baoan District People's Hospital	Nurse	3	No		No	Yes	Yes	No	No	Not worried	A little worried	Not worried	Not worried	No	No	No	No	Yes	Never	Never	Never	Not worried	Not worried	Not worried	A little hesitant	Strongly Agree	No	Strongly Agree	Strongly Agree	Don’t Know	Disagree	Disagree	Disagree	Disagree	Disagree	Strongly Agree	Strongly Agree	Disagree				Disagree
925	34	Male	Married	Bachelor	Intermediate	Governmental	Baoan District People's Hospital	Doctor	2	No	0	Yes	Yes	Yes	No	No	Not worried	Very worried	Very worried	Not worried	Yes	No	Yes	Yes	No							Somewhat hesitant	Strongly Agree	No	Strongly Agree	Strongly Agree	Yes	Disagree	Disagree	Strongly Disagree	Agree	Disagree	Disagree	Strongly Agree	Agree	Agree	Disagree	Disagree	Strongly Agree
830	41	Male	Unmarried	Bachelor	Senior	Governmental	Baoan District People's Hospital	Doctor	3	No		No	Yes	Yes	No	No	Not worried	A little worried	A little worried	Not worried	Yes	Yes	Yes	Yes	Don’t know							A little hesitant	Disagree	Yes	Strongly Agree	Strongly Agree	Yes	Strongly Disagree	Agree	Agree	Agree	Agree	Agree	Agree	Disagree				Disagree
1026	25	Female	Unmarried	Diploma	Intermediate	Governmental	Baoan District People's Hospital	Nurse	2	No	1-5	No	No	No	No	Yes	Not worried	Not worried	A little worried	A little worried	No	Yes	Yes	Yes	Yes	Once or twice	Once or twice	Once or twice	A little worried	A little worried	Not worried	A little hesitant	Agree	No	Strongly Agree	Strongly Agree	No	Agree	Disagree	Strongly Agree	Agree	Strongly Agree	Strongly Agree	Strongly Disagree	Disagree				Disagree
1112	40	Male	Unmarried	Diploma	Intermediate	Governmental	Baoan District People's Hospital	Doctor	3	No		No	Yes	Yes	No	No	A little worried	A little worried	Worried	A little worried	No	Yes	Not applicable	Yes	Yes	Once or twice	Once or twice	Never	A little worried	Worried	Worried	A little hesitant	Strongly Agree	Don’t Know	Strongly Agree	Strongly Agree	Yes	Agree	Disagree	Agree	Disagree	Disagree	Agree	Disagree	Agree	Disagree	Disagree	Agree	Disagree
1014	62	Male	Unmarried	Bachelor	Senior	Governmental	Baoan District People's Hospital	Medical /Laboratory Technician	3	No	0	No	Yes	No	No	No	Not applicable	Not applicable	Not applicable	Not applicable	Not applicable	Not applicable	Not applicable	Not applicable	Don’t know							Not hesitant	Disagree	Don’t Know	Disagree	Disagree	Don’t Know	Disagree	Disagree	Disagree	Disagree	Disagree	Agree	Strongly Agree	Disagree				Disagree
845	38	Female	Unmarried	Bachelor	Intermediate	Governmental	Baoan District People's Hospital	Nurse	3	No	1-5	No	Yes	No	No	No	Not worried	A little worried	A little worried	Not worried	Yes	Yes	Yes	Yes	Yes	Once or twice	Once or twice	Never	Not worried	Not worried	Not worried	A little hesitant	Strongly Agree	Don’t Know	Strongly Agree	Strongly Agree	Don’t Know	Disagree	Disagree	Disagree	Disagree	Disagree	Strongly Agree	Strongly Agree	Agree	Agree	Disagree	Agree	Disagree
953	49	Male	Unmarried	Bachelor	Intermediate	Governmental	Baoan District People's Hospital	Medical /Laboratory Technician	4	No	0	No	No	Yes	No	Yes	Not worried	Not worried	A little worried	Not worried	No	Yes	Yes	Yes	Don’t know							A little hesitant	Disagree	Yes	Strongly Agree	Strongly Agree	Yes	Agree	Disagree	Disagree	Agree	Disagree	Agree	Agree	Disagree				Disagree
912	50	Male	Unmarried	High school or others	None	Governmental	Baoan District People's Hospital	Security Guard	1	No		No	No	No	No	Yes	Not applicable	Worried	Not applicable	A little worried	Yes	Yes	Not applicable	Yes	No							Not hesitant	Strongly Agree	No	Disagree	Disagree	Don’t Know	Disagree	Disagree	Agree	Agree	Agree	Agree	Agree	Agree	Disagree	Disagree	Agree	Agree
796	22	Female	Married	Diploma	Primary	Private	Shenzhen Heng Sheng Hospital	Nurse	1	No	1-5	No	Yes	Yes	No	No	A little worried	Worried	A little worried	A little worried	No	Yes	Yes	Yes	Yes	Never	Never	Never	Not worried	Not worried	Not worried	A little hesitant	Agree	Don’t Know	Strongly Agree	Strongly Agree	No	Disagree	Disagree	Strongly Agree	Disagree	Disagree	Strongly Agree	Strongly Agree	Strongly Agree	Disagree	Agree	Disagree	Disagree
775	24	Female	Married	Diploma	None	Private	Shenzhen Heng Sheng Hospital	康复医助	1	No	0	No	Yes	Yes	No	No	Not worried	Not applicable	Not applicable	Not worried	No	Yes	Yes	Not applicable	Don’t know							Not hesitant	Strongly Agree	Yes	Strongly Agree	Strongly Agree	Yes	Agree	Disagree	Disagree	Disagree	Disagree	Agree	Strongly Agree	Agree	Disagree	Disagree	Agree	Disagree
1012	33	Female	Unmarried	Bachelor	Intermediate	Private	Shenzhen Heng Sheng Hospital	Nurse	3	No		No	Yes	Yes	No	No	Very worried	Very worried	Very worried	Not worried	Yes	Yes	Yes	Yes	No							A little hesitant	Disagree	Don’t Know	Disagree	Disagree	Don’t Know	Agree	Disagree	Disagree	Disagree	Strongly Disagree	Disagree	Agree	Strongly Agree	Disagree	Agree	Agree	Strongly Agree
1351	61	Female	Remarried	High school or others	None	Private	Shenzhen Heng Sheng Hospital	Cleaning staff	1	No		No	Yes	Yes	Yes	No	Not worried	Not worried	Not applicable	Not applicable	Not applicable	Yes	Yes	Yes	Don’t know							Not hesitant	Agree	No	Strongly Agree	Strongly Agree	Yes	Agree	Disagree	Agree	Agree	Disagree	Agree	Agree	Disagree				Disagree
777	25	Female	Married	Diploma	Primary	Private	Shenzhen Heng Sheng Hospital	Nurse	1	No		Yes	Yes	Yes	Yes	No	Not worried	Worried	Worried	Not worried	No	No	No	Yes	No							A little hesitant	Strongly Agree	Don’t Know	Strongly Agree	Strongly Agree	Don’t Know	Agree	Agree	Disagree	Disagree	Agree	Agree	Strongly Agree	Disagree				Disagree
1304	48	Female	Unmarried	High school or others	None	Private	Shenzhen Heng Sheng Hospital	Cleaning staff	1	No		No	Yes	Yes	No	No	Not worried	Worried	Worried	Not worried	Yes	Yes	Yes	Yes	Don’t know							Very hesitant	Disagree	Don’t Know	Strongly Agree	Strongly Agree	Don’t Know	Agree	Strongly Disagree	Disagree	Disagree	Disagree	Agree	Agree	Disagree				Disagree
945	25	Female	Married	Bachelor	Primary	Private	Shenzhen Heng Sheng Hospital	Nurse	1	No		Yes	Yes	Yes	Yes	No	Not worried	Not worried	A little worried	Not worried	Not applicable	Not applicable	Not applicable	Not applicable	Don’t know							Not hesitant	Strongly Agree	Don’t Know	Strongly Agree	Strongly Agree	Yes	Agree	Strongly Disagree	Disagree	Disagree	Disagree	Agree	Agree	Strongly Disagree				Strongly Disagree
767	29	Male	Married	Diploma	None	Private	Shenzhen Heng Sheng Hospital	Doctor	2	Yes	1-5	No	No	No	No	Yes	Very worried	A little worried	Very worried	A little worried	Yes	Yes	Yes	Yes	Yes	Never	Never	Never	A little worried	Not worried	Not worried	Somewhat hesitant	Agree	Yes	Agree	Agree	No	Strongly Agree	Disagree	Agree	Strongly Agree	Agree	Agree	Strongly Agree	Disagree				Agree
973	25	Female	Unmarried	Diploma	Primary	Private	Shenzhen Heng Sheng Hospital	Nurse	1	No	0	Yes	Yes	Yes	No	No	A little worried	A little worried	A little worried	A little worried	Not applicable	Not applicable	Not applicable	Not applicable	No							A little hesitant	Strongly Agree	Don’t Know	Strongly Agree	Strongly Agree	Yes	Agree	Disagree	Agree	Agree	Disagree	Disagree	Disagree	Disagree				Disagree
1002	29	Male	Unmarried	Diploma	Primary	Private	Shenzhen Heng Sheng Hospital	Anesthetist	2	No	1-5	No	Yes	Yes	No	No	Not worried	A little worried	Worried	Not worried	No	Yes	Yes	Yes	Yes	Once or twice	Once or twice	Once or twice	A little worried	A little worried	Not worried	A little hesitant	Disagree	Don’t Know	Strongly Agree	Strongly Agree	Don’t Know	Disagree	Disagree	Agree	Disagree	Disagree	Strongly Agree	Agree	Disagree				Disagree
964	36	Male	Unmarried	Bachelor	Intermediate	Private	Shenzhen Heng Sheng Hospital	Medical /Laboratory Technician	3	No		No	Yes	Yes	No	No	A little worried	A little worried	Not worried	Not worried	No	Yes	Yes	Yes	Don’t know							A little hesitant	Agree	No	Strongly Agree	Strongly Agree	No	Agree	Disagree	Disagree	Agree	Disagree	Agree	Agree	Disagree				Disagree
906	22	Female	Married	Diploma	Primary	Private	Shenzhen Heng Sheng Hospital	Nurse	1	No	0	No	Yes	Yes	No	No	A little worried	Worried	Worried	Not worried	No	Yes	Yes	Yes	No							Somewhat hesitant	Strongly Agree	No	Strongly Agree	Strongly Agree	No	Disagree	Disagree	Disagree	Disagree	Disagree	Agree	Agree	Disagree				Disagree
801	30	Female	Unmarried	Bachelor	Intermediate	Private	Shenzhen Heng Sheng Hospital	Nurse	3	No		Yes	Yes	Yes	No	No	Very worried	Very worried	Very worried	Very worried	Yes	Yes	Yes	Yes	No							Somewhat hesitant	Agree	No	Strongly Agree	Strongly Agree	Yes	Agree	Disagree	Disagree	Disagree	Strongly Disagree	Agree	Agree	Agree	Agree	Disagree	Agree	Disagree
809	21	Female	Married	Diploma	None	Private	Shenzhen Heng Sheng Hospital	Nurse	1	No	6-10	No	Yes	Yes	No	No	A little worried	Worried	Worried	Not worried	Yes	Yes	Yes	Yes	Yes	Never	Never	Never	A little worried	Worried	Not worried	Very hesitant	Agree	Don’t Know	Strongly Agree	Strongly Agree	Yes	Agree	Agree	Agree	Strongly Agree	Disagree	Agree	Agree	Agree	Disagree	Agree	Agree	Disagree
776	32	Male	Unmarried	Diploma	Primary	Private	Shenzhen Heng Sheng Hospital	Pharmacist	2	No	0	No	No	No	No	Yes	A little worried	Worried	Not worried	Not worried	Not applicable	Not applicable	Not applicable	Not applicable	No							Somewhat hesitant	Agree	Don’t Know	Disagree	Disagree	No	Disagree	Disagree	Disagree	Disagree	Disagree	Agree	Agree	Agree	Disagree	Agree	Disagree	Agree
849	25	Female	Married	Diploma	Primary	Private	Shenzhen Heng Sheng Hospital	Nurse	2	No	1-5	No	Yes	Yes	No	No	Worried	Not worried	A little worried	Not worried	No	No	No	Yes	Yes	Never	Never	Never	Not worried	A little worried	Not worried	A little hesitant	Strongly Agree	No	Strongly Agree	Strongly Agree	Yes	Disagree	Disagree	Agree	Disagree	Disagree	Agree	Agree	Disagree				Disagree
966	39	Female	Married	Diploma	Primary	Private	Shenzhen Heng Sheng Hospital	Doctor	3	No	0	No	Yes	No	Yes	No	Not applicable	A little worried	Very worried	Not worried	Not applicable	Not applicable	Yes	Yes	Don’t know							A little hesitant	Strongly Agree	Yes	Strongly Agree	Strongly Agree	Yes	Disagree	Strongly Disagree	Strongly Disagree	Strongly Disagree	Strongly Disagree	Strongly Agree	Agree	Disagree				Disagree
862	32	Female	Unmarried	Bachelor	Intermediate	Private	Shenzhen Heng Sheng Hospital	Nurse	3	No		Yes	Yes	Yes	No	No	Not worried	A little worried	A little worried	Not worried	No	Yes	No	Yes	No							A little hesitant	Agree	Yes	Strongly Agree	Strongly Agree	Yes	Agree	Disagree	Agree	Agree	Disagree	Agree	Agree	Disagree				Disagree
784	31	Female	Married	Diploma	Primary	Private	Shenzhen Heng Sheng Hospital	Nurse	2	No	1-5	No	Yes	Yes	No	No	Not worried	A little worried	Not worried	Not worried	No	No	No	Yes	Yes	Never	Never	Never	Not worried	Not worried	Not worried	A little hesitant	Agree	Don’t Know	Strongly Agree	Strongly Agree	Don’t Know	Disagree	Disagree	Disagree	Disagree	Disagree	Disagree	Disagree	Agree	Disagree	Agree	Agree	Disagree
893	32	Female	Divorced	Master or higher	Intermediate	Private	Shenzhen Heng Sheng Hospital	Medical /Laboratory Technician	2	No	0	Yes	Yes	Yes	Yes	No	Not worried	A little worried	A little worried	Not worried	No	No	Yes	No	No							Not hesitant	Strongly Agree	No	Strongly Agree	Strongly Agree	Yes	Disagree	Disagree	Disagree	Disagree	Disagree	Agree	Agree	Agree	Agree	Disagree	Agree	Disagree
903	33	Male	Unmarried	Bachelor	Intermediate	Private	Shenzhen Heng Sheng Hospital	Nurse	2	No		No	No	No	No	Yes	Not applicable	Not applicable	Not applicable	Not applicable	No	Yes	Yes	Yes	No							Somewhat hesitant	Disagree	Don’t Know	Strongly Agree	Strongly Agree	No	Disagree	Disagree	Disagree	Disagree	Disagree	Agree	Agree	Agree	Disagree	Agree	Disagree	Disagree
954	29	Female	Married	Diploma	Primary	Private	Shenzhen Heng Sheng Hospital	Nurse	2	No	1-5	No	Yes	Yes	No	No	Not worried	Worried	Very worried	Not worried	No	No	No	Yes	No							Not hesitant	Agree	Yes	Strongly Agree	Strongly Agree	No	Disagree	Disagree	Agree	Agree	Strongly Disagree	Strongly Disagree	Strongly Agree	Strongly Disagree				Strongly Disagree
967	29	Female	Unmarried	Diploma	Primary	Private	Shenzhen Heng Sheng Hospital	Nurse	2	No	0	No	Yes	No	No	No	A little worried	Worried	Worried	A little worried	Not applicable	Not applicable	Not applicable	Not applicable	Don’t know							A little hesitant	Agree	Don’t Know	Strongly Agree	Strongly Agree	Don’t Know	Agree	Disagree	Disagree	Disagree	Disagree	Disagree	Agree	Disagree				Disagree
1004	20	Female	Married	Diploma	None	Private	Shenzhen Heng Sheng Hospital	Receptionist	1	No		No	No	No	No	Yes	Not worried	Very worried	Very worried	Not worried	Yes	Yes	Yes	Yes	Don’t know							Somewhat hesitant	Disagree	No	Disagree	Disagree	Don’t Know	Agree	Disagree	Disagree	Strongly Disagree	Strongly Disagree	Agree	Agree	Agree	Agree	Agree	Disagree	Disagree
887	30	Female	Unmarried	Diploma	Primary	Private	Shenzhen Heng Sheng Hospital	Nurse	2	No		Yes	Yes	Yes	Yes	Yes	Not worried	Not worried	Not worried	Not worried	No	Yes	Yes	No	No							Not hesitant	Agree	No	Strongly Agree	Strongly Agree	Yes	Agree	Disagree	Agree	Disagree	Disagree	Agree	Strongly Agree	Disagree				Disagree
799	27	Female	Unmarried	Diploma	Primary	Private	Shenzhen Heng Sheng Hospital	Nurse	2	No		No	Yes	Yes	No	No	Not applicable	Not applicable	Not applicable	Not applicable	Not applicable	Not applicable	Not applicable	Not applicable	No							A little hesitant	Strongly Agree	Don’t Know	Strongly Agree	Strongly Agree	Yes	Strongly Agree	Strongly Agree	Disagree	Disagree	Disagree	Disagree	Strongly Agree	Disagree				Disagree
997	20	Female	Married	Diploma	Primary	Private	Shenzhen Heng Sheng Hospital	Nurse	1	No		No	Yes	No	No	No	Worried	Worried	Worried	Not worried	No	Yes	Yes	Yes	Don’t know							A little hesitant	Disagree	Don’t Know	Strongly Agree	Strongly Agree	Don’t Know	Disagree	Strongly Disagree	Disagree	Disagree	Disagree	Agree	Agree	Disagree				Disagree
1349	62	Male	Unmarried	High school or others	None	Private	Shenzhen Heng Sheng Hospital	Cleaning staff	1	No		No	Yes	Yes	No	No	Not applicable	Not applicable	Not applicable	Not applicable	Not applicable	Yes	Not applicable	Yes	Don’t know							A little hesitant	Disagree	Don’t Know	Disagree	Disagree	Don’t Know	Strongly Agree	Disagree	Strongly Disagree	Strongly Disagree	Strongly Disagree	Agree	Disagree	Strongly Disagree				Strongly Disagree
770	21	Female	Married	Diploma	Primary	Private	Shenzhen Heng Sheng Hospital	Receptionist	1	No		No	No	No	No	Yes	A little worried	A little worried	A little worried	A little worried	No	Yes	Yes	Yes	Don’t know							A little hesitant	Agree	Yes	Strongly Agree	Strongly Agree	Don’t Know	Disagree	Disagree	Disagree	Disagree	Disagree	Agree	Disagree	Disagree				Disagree
977	25	Female	Married	Diploma	Primary	Private	Shenzhen Heng Sheng Hospital	Nurse	1	No		No	No	No	No	Yes	Not worried	Very worried	Worried	Not worried	Not applicable	Yes	Yes	Yes	No							Somewhat hesitant	Disagree	Don’t Know	Disagree	Disagree	Don’t Know	Disagree	Disagree	Disagree	Disagree	Disagree	Agree	Agree	Disagree				Disagree
778	35	Male	Unmarried	Bachelor	Primary	Private	Shenzhen Heng Sheng Hospital	Doctor	2	No	1-5	No	Yes	Yes	Yes	No	Not worried	A little worried	A little worried	Not worried	No	Yes	No	Yes	Don’t know							A little hesitant	Strongly Agree	Yes	Disagree	Strongly Agree	Yes	Strongly Agree	Disagree	Agree	Strongly Agree	Disagree	Agree	Agree	Agree	Disagree	Agree	Disagree	Agree
851	25	Female	Unmarried	Diploma	Primary	Private	Shenzhen Heng Sheng Hospital	Nurse	1	No	0	Yes	Yes	Yes	Yes	No	A little worried	Worried	Worried	Not worried	No	No	Yes	Yes	No							A little hesitant	Disagree	No	Strongly Agree	Strongly Agree	Yes	Disagree	Disagree	Disagree	Disagree	Disagree	Disagree	Disagree	Disagree				Disagree
802	24	Female	Married	Diploma	Primary	Private	Shenzhen Heng Sheng Hospital	Nurse	1	No	1-5	Yes	Yes	Yes	Yes	Yes	Worried	Very worried	A little worried	Not worried	No	Yes	Yes	Yes	Yes	Never	Never	Never	Not worried	Not worried	Not worried	A little hesitant	Agree	Don’t Know	Strongly Agree	Strongly Agree	Yes	Agree	Disagree	Disagree	Disagree	Disagree	Agree	Agree	Disagree				Disagree
787	49	Male	Unmarried	Diploma	Intermediate	Private	Shenzhen Heng Sheng Hospital	Medical /Laboratory Technician	4	No	0	Yes	Yes	Yes	Yes	No	Not worried	A little worried	Not worried	Not worried	No	Yes	Yes	Yes	Yes	Never	Never	Never	Not worried	Not worried	Not worried	A little hesitant	Strongly Agree	Yes	Strongly Agree	Strongly Agree	Yes	Disagree	Disagree	Disagree	Disagree	Disagree	Agree	Agree	Disagree				Disagree
978	33	Female	Unmarried	Diploma	Intermediate	Private	Shenzhen Heng Sheng Hospital	Doctor	3	No	≥11	No	Yes	Yes	No	No	Not worried	Not worried	A little worried	Not worried	No	No	Yes	No	Yes	Never	Never	Never	A little worried	Not worried	Not worried	A little hesitant	Strongly Agree	Yes	Disagree	Strongly Agree	Yes	Agree	Disagree	Agree	Disagree	Strongly Disagree	Agree	Agree	Disagree				Disagree
780	23	Female	Married	Diploma	Primary	Private	Shenzhen Heng Sheng Hospital	Nurse	1	No	1-5	No	No	No	No	Yes	A little worried	Very worried	Very worried	Not worried	Yes	Yes	Yes	Yes	Don’t know							Somewhat hesitant	Disagree	Yes	Disagree	Disagree	Don’t Know	Strongly Disagree	Disagree	Strongly Disagree	Strongly Agree	Agree	Agree	Agree	Strongly Agree	Agree	Disagree	Disagree	Disagree
763	30	Female	Unmarried	Diploma	Primary	Private	Shenzhen Heng Sheng Hospital	Nurse	2	No	0	No	Yes	Yes	No	No	A little worried	A little worried	Worried	Not worried	Yes	Yes	No	Yes	Don’t know							Somewhat hesitant	Disagree	Don’t Know	Disagree	Strongly Agree	Don’t Know	Disagree	Disagree	Disagree	Disagree	Disagree	Agree	Agree	Disagree				Disagree
1305	61	Female	Unmarried	High school or others	None	Private	Shenzhen Heng Sheng Hospital	Cleaning staff	1	No		No	Yes	No	No	No	Not worried	Not worried	Not worried	Not worried	No	No	No	Yes	Don’t know							Not hesitant	Disagree	Don’t Know	Disagree	Strongly Agree	Yes	Agree	Disagree	Disagree	Disagree	Disagree	Disagree	Disagree	Disagree				Disagree
927	27	Female	Unmarried	Bachelor	Primary	Private	Shenzhen Heng Sheng Hospital	Obstetrician and Gynecologist	2	No		Yes	Yes	Yes	Yes	No	A little worried	A little worried	A little worried	Not worried	No	No	No	Yes	Yes	Never	Never	Never	Not worried	Not worried	Not worried	A little hesitant	Strongly Agree	Yes	Strongly Agree	Strongly Agree	Yes	Disagree	Disagree	Disagree	Disagree	Disagree	Disagree	Disagree	Disagree				Disagree
871	26	Female	Unmarried	Diploma	None	Private	Shenzhen Heng Sheng Hospital	Nurse	1	No		Yes	Yes	Yes	Yes	No	A little worried	A little worried	A little worried	A little worried	Yes	Yes	Yes	Yes	Yes	Never	Never	Never	Not worried	Not worried	Not worried	A little hesitant	Strongly Agree	Don’t Know	Strongly Agree	Strongly Agree	Yes	Agree	Disagree	Disagree	Disagree	Disagree	Strongly Agree	Strongly Agree	Disagree				Disagree
934	24	Male	Married	Diploma	Primary	Private	Shenzhen Heng Sheng Hospital	Nurse	1	No	1-5	Yes	Yes	Yes	Yes	No	A little worried	Not applicable	Not applicable	A little worried	Yes	Yes	Yes	Yes	Don’t know							A little hesitant	Strongly Agree	Don’t Know	Strongly Agree	Strongly Agree	Don’t Know	Strongly Agree	Disagree	Strongly Disagree	Strongly Disagree	Agree	Agree	Agree	Strongly Agree	Agree	Agree	Agree	Disagree
786	38	Male	Unmarried	Bachelor	Intermediate	Private	Shenzhen Heng Sheng Hospital	Doctor	3	No		No	Yes	Yes	No	No	Not worried	Not worried	Not applicable	Not applicable	Yes	Yes	Yes	Yes	Yes	Once or twice	Once or twice	Never	A little worried	Not worried	A little worried	A little hesitant	Agree	Yes	Strongly Agree	Strongly Agree	Don’t Know	Disagree	Agree	Agree	Disagree	Disagree	Agree	Disagree	Disagree				Disagree
944	40	Female	Unmarried	High school or others	None	Private	Shenzhen Heng Sheng Hospital	Nursing worker	1	No	0	No	No	Yes	No	No	Not applicable	Not applicable	Not applicable	Not applicable	Not applicable	Not applicable	Not applicable	Not applicable	Don’t know							A little hesitant	Disagree	Yes	Strongly Agree	Strongly Agree	Yes	Disagree	Disagree	Disagree	Disagree	Disagree	Agree	Agree	Disagree				Disagree
790	29	Male	Unmarried	Diploma	Primary	Private	Shenzhen Heng Sheng Hospital	Pharmacist	1	No		No	Yes	Yes	No	No	Not worried	Worried	A little worried	Not worried	No	Yes	No	Yes	Yes	Never	Never	Never	Not worried	Not worried	Not worried	Not hesitant	Strongly Agree	Yes	Strongly Agree	Strongly Agree	Yes	Agree	Strongly Agree	Disagree	Strongly Agree	Agree	Strongly Agree	Agree	Disagree				Disagree
1311	60	Male	Unmarried	High school or others	None	Private	Shenzhen Heng Sheng Hospital	Cleaning staff	1	No	1-5	No	No	No	No	Yes	Not worried	Not applicable	Not applicable	Not applicable	Not applicable	Not applicable	Not applicable	Not applicable	Don’t know							Not hesitant	Disagree	Don’t Know	Strongly Agree	Strongly Agree	Don’t Know	Agree	Disagree	Disagree	Disagree	Disagree	Agree	Agree	Strongly Disagree				Strongly Disagree
949	50	Female	Unmarried	High school or others	None	Private	Shenzhen Heng Sheng Hospital	Nursing worker	1	No	0	No	Yes	No	No	No	Not worried	Not worried	Not worried	Not worried	Not applicable	Not applicable	Not applicable	Not applicable	Don’t know							Not hesitant	Agree	No	Strongly Agree	Strongly Agree	Yes	Agree	Disagree	Disagree	Disagree	Disagree	Disagree	Agree	Disagree				Disagree
853	25	Female	Married	Bachelor	Primary	Private	Shenzhen Heng Sheng Hospital	Nurse	1	No		No	Yes	Yes	No	No	Not applicable	Not applicable	Not applicable	Not applicable	No	Yes	Yes	No	Don’t know							A little hesitant	Disagree	Don’t Know	Strongly Agree	Strongly Agree	No	Disagree	Disagree	Strongly Disagree	Disagree	Disagree	Agree	Disagree	Agree	Disagree	Agree	Disagree	Strongly Disagree
1345	23	Female	Married	Diploma	None	Private	Shenzhen Heng Sheng Hospital	Receptionist	1	No	1-5	Yes	Yes	Yes	Yes	No	Not worried	Worried	Worried	Not worried	Yes	Yes	Yes	Yes	Yes	Never	Never	Never	Not worried	Not worried	Not worried	Not hesitant	Strongly Agree	Yes	Strongly Agree	Strongly Agree	Yes	Disagree	Disagree	Disagree	Disagree	Disagree	Agree	Agree	Disagree				Disagree
931	22	Male	Married	Diploma	None	Private	Shenzhen Heng Sheng Hospital	Dentist	1	No	6-10	No	No	Yes	No	No	A little worried	A little worried	A little worried	A little worried	Yes	Yes	Yes	Yes	Yes	Never	Never	Never	A little worried	A little worried	A little worried	A little hesitant	Disagree	Don’t Know	Disagree	Disagree	Don’t Know	Disagree	Agree	Agree	Disagree	Disagree	Agree	Disagree	Disagree				Disagree
926	22	Male	Married	Diploma	Primary	Private	Shenzhen Heng Sheng Hospital	Medical /Laboratory Technician	1	No	0	Yes	Yes	Yes	Yes	No	A little worried	Not applicable	Not applicable	Not applicable	No	Yes	Yes	Not applicable	Yes	Once or twice	Never	Never	A little worried	Not worried	A little worried	Not hesitant	Strongly Agree	Don’t Know	Disagree	Disagree	No	Disagree	Disagree	Disagree	Disagree	Strongly Disagree	Disagree	Agree	Agree	Disagree	Disagree	Agree	Strongly Disagree
982	23	Female	Married	Diploma	Primary	Private	Shenzhen Heng Sheng Hospital	Nurse	2	No		Yes	Yes	Yes	Yes	No	Not applicable	Not worried	Not worried	Not worried	Not applicable	Not applicable	Yes	Yes	Don’t know							Not hesitant	Strongly Agree	Yes	Strongly Agree	Strongly Agree	No	Disagree	Disagree	Strongly Disagree	Disagree	Disagree	Agree	Strongly Agree	Disagree				Agree
759	28	Female	Married	Bachelor	Primary	Private	Shenzhen Heng Sheng Hospital	Doctor	2	Yes		No	Yes	No	No	No	Not worried	A little worried	A little worried	Not worried	Yes	Yes	No	No	No							A little hesitant	Strongly Agree	Don’t Know	Strongly Agree	Strongly Agree	Yes	Strongly Disagree	Disagree	Agree	Agree	Disagree	Strongly Agree	Strongly Agree	Disagree				Disagree
979	35	Female	Unmarried	Diploma	Intermediate	Private	Shenzhen Heng Sheng Hospital	Nurse	3	No		No	Yes	Yes	No	No	A little worried	Very worried	Very worried	Not worried	Not applicable	Yes	Yes	Yes	Don’t know							Somewhat hesitant	Agree	Yes	Strongly Agree	Strongly Agree	Don’t Know	Agree	Disagree	Disagree	Agree	Agree	Strongly Agree	Strongly Agree	Agree	Agree	Disagree	Agree	Agree
779	27	Female	Married	Diploma	Primary	Private	Shenzhen Heng Sheng Hospital	Nurse	2	No		No	No	No	No	Yes	Very worried	Very worried	Very worried	Very worried	Yes	Yes	Yes	Yes	Yes	Never	Never	Never	Not worried	Not worried	Not worried	Somewhat hesitant	Strongly Agree	No	Strongly Agree	Strongly Agree	No	Agree	Disagree	Agree	Strongly Agree	Agree	Agree	Strongly Agree	Disagree				Disagree
814	43	Female	Unmarried	Bachelor	Intermediate	Private	Shenzhen Heng Sheng Hospital	Dentist	3	No		No	Yes	No	No	No	A little worried	Very worried	Very worried	Not worried	Yes	Yes	Yes	Yes	No							A little hesitant	Disagree	Don’t Know	Strongly Agree	Strongly Agree	No	Disagree	Disagree	Disagree	Disagree	Disagree	Agree	Agree	Agree	Disagree	Agree	Agree	Disagree
768	23	Female	Married	High school or others	Primary	Private	Shenzhen Heng Sheng Hospital	Nurse	1	No	1-5	No	Yes	Yes	No	No	A little worried	Worried	Worried	Not worried	Yes	Yes	No	No	Don’t know							A little hesitant	Strongly Agree	No	Disagree	Strongly Agree	No	Disagree	Agree	Agree	Strongly Disagree	Strongly Disagree	Strongly Disagree	Agree	Disagree				Agree
965	23	Female	Married	Bachelor	None	Private	Shenzhen Heng Sheng Hospital	Nurse	1	No	0	No	Yes	Yes	No	No	A little worried	Worried	Worried	A little worried	Not applicable	Yes	No	No	No							Somewhat hesitant	Strongly Agree	Don’t Know	Agree	Disagree	Yes	Agree	Disagree	Agree	Agree	Disagree	Agree	Agree	Agree	Disagree	Agree	Disagree	Strongly Disagree
826	47	Female	Divorced	Bachelor	Intermediate	Private	Shenzhen Heng Sheng Hospital	Nurse	4	No	1-5	No	Yes	Yes	Yes	No	Not worried	A little worried	Not worried	Not worried	No	No	No	Yes	Yes	Once or twice	Once or twice	Never	A little worried	A little worried	Worried	A little hesitant	Agree	Yes	Strongly Agree	Strongly Agree	No	Agree	Disagree	Disagree	Disagree	Disagree	Agree	Disagree	Disagree				Disagree
822	28	Female	Unmarried	Bachelor	Primary	Private	Shenzhen Heng Sheng Hospital	Nurse	2	No	0	No	Yes	No	No	No	A little worried	Very worried	Very worried	Not worried	No	Yes	Yes	Yes	No							A little hesitant	Agree	Yes	Strongly Agree	Strongly Agree	Yes	Agree	Disagree	Agree	Agree	Agree	Agree	Agree	Agree	Disagree	Agree	Disagree	Agree
914	20	Female	Married	High school or others	None	Private	Shenzhen Heng Sheng Hospital	Nurse	1	No		Yes	Yes	Yes	Yes	No	Not applicable	Not applicable	Not applicable	Not applicable	Not applicable	Not applicable	Not applicable	Not applicable	Don’t know							A little hesitant	Disagree	Don’t Know	Strongly Agree	Strongly Agree	Don’t Know	Strongly Disagree	Disagree	Disagree	Strongly Disagree	Disagree	Strongly Disagree	Agree	Disagree				Disagree
976	25	Male	Married	Diploma	Primary	Private	Shenzhen Heng Sheng Hospital	Medical /Laboratory Technician	1	No		No	Yes	Yes	No	No	A little worried	A little worried	A little worried	A little worried	Yes	Yes	Yes	Yes	Yes	Once or twice	Once or twice	Once or twice	A little worried	A little worried	A little worried	A little hesitant	Strongly Agree	Yes	Strongly Agree	Strongly Agree	Yes	Agree	Agree	Agree	Agree	Agree	Agree	Agree	Agree	Agree	Disagree	Disagree	Agree
866	38	Female	Unmarried	Bachelor	Intermediate	Private	Shenzhen Heng Sheng Hospital	Nurse	3	No		Yes	Yes	Yes	Yes	No	Not worried	Not worried	Not worried	Not worried	Yes	Yes	Yes	Yes	No							A little hesitant	Strongly Agree	Yes	Strongly Agree	Strongly Agree	Yes	Agree	Agree	Agree	Agree	Agree	Agree	Agree	Disagree				Disagree
904	22	Female	Married	High school or others	None	Private	Shenzhen Heng Sheng Hospital	Nurse	1	No		Yes	Yes	Yes	Yes	No	Not worried	Not worried	Not worried	Not worried	No	No	No	Yes	Don’t know							Not hesitant	Strongly Agree	Yes	Strongly Agree	Strongly Agree	Yes	Agree	Strongly Disagree	Disagree	Disagree	Disagree	Agree	Agree	Disagree				Disagree
1320	65	Male	Unmarried	High school or others	None	Private	Shenzhen Heng Sheng Hospital	Cleaning staff	1	No		No	Yes	Yes	No	No	Not worried	Not applicable	Not applicable	Not applicable	No	Not applicable	Not applicable	Not applicable	Don’t know							Not hesitant	Disagree	Don’t Know	Strongly Agree	Strongly Agree	Don’t Know	Agree	Disagree	Disagree	Disagree	Disagree	Agree	Strongly Disagree	Strongly Disagree				Strongly Disagree
875	29	Female	Divorced	Diploma	Intermediate	Private	Shenzhen Heng Sheng Hospital	Nurse	2	No		Yes	Yes	Yes	Yes	No	Very worried	Very worried	Very worried	Very worried	No	Yes	Yes	Yes	Don’t know							Somewhat hesitant	Strongly Agree	Don’t Know	Strongly Agree	Strongly Agree	Don’t Know	Disagree	Disagree	Strongly Disagree	Agree	Agree	Agree	Agree	Agree	Agree	Agree	Disagree	Agree
992	23	Female	Married	Diploma	Primary	Private	Shenzhen Heng Sheng Hospital	Nurse	1	No		No	Yes	Yes	No	No	A little worried	Very worried	Worried	Not worried	No	Yes	Yes	Yes	Don’t know							A little hesitant	Disagree	Don’t Know	Strongly Agree	Strongly Agree	Don’t Know	Disagree	Disagree	Disagree	Disagree	Disagree	Agree	Agree	Disagree				Disagree
902	34	Female	Unmarried	Bachelor	Primary	Private	Shenzhen Heng Sheng Hospital	Obstetrician and Gynecologist	2	Yes		Yes	Yes	Yes	Yes	No	A little worried	A little worried	A little worried	Not worried	No	Yes	No	Yes	No							Not hesitant	Strongly Agree	Yes	Strongly Agree	Strongly Agree	Yes	Agree	Disagree	Disagree	Disagree	Disagree	Disagree	Agree	Disagree				Disagree
1000	25	Female	Unmarried	Diploma	Primary	Private	Shenzhen Heng Sheng Hospital	Nurse	2	No	1-5	No	No	No	No	Yes	A little worried	Very worried	Very worried	A little worried	No	Yes	Yes	Yes	Yes	Never	Never	Never	Not worried	Not worried	Not worried	Somewhat hesitant	Disagree	Don’t Know	Disagree	Disagree	Don’t Know	Strongly Agree	Disagree	Disagree	Disagree	Disagree	Agree	Strongly Agree	Disagree				Disagree
783	23	Female	Married	Diploma	Primary	Private	Shenzhen Heng Sheng Hospital	Nurse	1	No		No	Yes	Yes	No	No	A little worried	Worried	A little worried	Not worried	No	No	No	Yes	Yes	Never	Never	Never	A little worried	Not worried	Not worried	A little hesitant	Strongly Agree	Yes	Disagree	Disagree	Don’t Know	Disagree	Disagree	Disagree	Disagree	Disagree	Strongly Agree	Strongly Agree	Strongly Disagree				Disagree
993	55	Male	Unmarried	Bachelor	Senior	Private	Shenzhen Heng Sheng Hospital	Medical /Laboratory Technician	4	No	0	Yes	Yes	Yes	No	No	Not worried	A little worried	A little worried	Not worried	Not applicable	Yes	Yes	Yes	Don’t know							A little hesitant	Disagree	No	Strongly Agree	Strongly Agree	Don’t Know	Disagree	Agree	Disagree	Agree	Disagree	Disagree	Agree	Disagree				Disagree
811	23	Female	Married	Bachelor	Primary	Private	Shenzhen Heng Sheng Hospital	Nurse	1	No	1-5	No	Yes	Yes	No	No	A little worried	Worried	Very worried	Not worried	Yes	Yes	Yes	Yes	Don’t know							A little hesitant	Agree	Don’t Know	Strongly Agree	Strongly Agree	Yes	Disagree	Disagree	Strongly Agree	Agree	Agree	Strongly Agree	Strongly Agree	Disagree				Disagree
921	24	Female	Married	Diploma	Primary	Private	Shenzhen Heng Sheng Hospital	Nurse	1	No	0	Yes	Yes	Yes	No	No	Not worried	Not worried	Not worried	Not worried	Not applicable	Not applicable	Not applicable	Not applicable	Don’t know							A little hesitant	Disagree	No	Strongly Agree	Strongly Agree	Yes	Disagree	Strongly Disagree	Disagree	Strongly Disagree	Disagree	Disagree	Agree	Disagree				Agree
771	21	Female	Married	Diploma	Primary	Private	Shenzhen Heng Sheng Hospital	Nurse	1	No		No	Yes	Yes	No	No	Not worried	A little worried	A little worried	Not worried	No	Yes	Yes	Yes	Don’t know							A little hesitant	Strongly Agree	Don’t Know	Strongly Agree	Strongly Agree	Don’t Know	Disagree	Disagree	Disagree	Disagree	Disagree	Agree	Disagree	Disagree				Disagree
957	29	Female	Unmarried	Bachelor	Primary	Private	Shenzhen Heng Sheng Hospital	Doctor	1	No		Yes	Yes	Yes	No	No	Not worried	Not applicable	Not applicable	Not applicable	No	No	No	No	Yes	Never	Never	Never	Not worried	Not worried	Not worried	Not hesitant	Strongly Agree	No	Strongly Agree	Strongly Agree	Yes	Disagree	Strongly Disagree	Disagree	Disagree	Strongly Disagree	Agree	Disagree	Disagree				Disagree
797	21	Female	Married	Diploma	Primary	Private	Shenzhen Heng Sheng Hospital	Nurse	1	No	1-5	No	Yes	Yes	No	No	Worried	Very worried	Worried	Not worried	No	Yes	Yes	Yes	Yes	Never	Never	Never	Not worried	Not worried	Not worried	A little hesitant	Agree	No	Disagree	Strongly Agree	No	Disagree	Disagree	Strongly Agree	Disagree	Disagree	Strongly Agree	Strongly Agree	Strongly Agree	Agree	Agree	Disagree	Agree
113	52	Male	Unmarried	Bachelor	Senior	Governmental	Baoan District Central Hospital	Doctor	4	No	0	Yes	Yes	Yes	Yes	No	A little worried	Not applicable	Not applicable	Not worried	No	Not applicable	Not applicable	Not applicable	Don’t know							Not hesitant	Strongly Agree	Yes	Strongly Agree	Strongly Agree	Yes	Disagree	Strongly Disagree	Disagree	Disagree	Strongly Disagree	Disagree	Disagree	Disagree				Disagree
758	50	Male	Unmarried	Bachelor	Senior	Governmental	Baoan District Central Hospital	Doctor	4	No		Yes	Yes	Yes	Yes	No	Not worried	Not worried	Not worried	Not worried	No	Yes	Yes	Yes	Yes	Never	Never	Never	Not worried	Not worried	Not worried	Not hesitant	Strongly Agree	Yes	Strongly Agree	Strongly Agree	Don’t Know	Strongly Disagree	Strongly Disagree	Disagree	Strongly Disagree	Strongly Disagree	Strongly Disagree	Strongly Agree	Strongly Disagree				Strongly Disagree
154	50	Female	Unmarried	Bachelor	Senior	Governmental	Baoan District Central Hospital	Doctor	4	No		No	Yes	Yes	No	No	Not applicable	Not applicable	Not applicable	Not applicable	No	No	Yes	No	Yes	Never	Never	Never	Not worried	Not worried	Not worried	A little hesitant	Disagree	Yes	Strongly Agree	Strongly Agree	No	Agree	Disagree	Agree	Disagree	Disagree	Agree	Agree	Disagree				Disagree
126	47	Female	Unmarried	Diploma	Intermediate	Governmental	Baoan District Central Hospital	Nurse	4	No	1-5	Yes	Yes	Yes	No	No	Not worried	Not worried	Not worried	Not worried	No	Yes	No	No	Yes	Never	Never	Never	Not worried	Not worried	Not worried	Not hesitant	Agree	No	Strongly Agree	Strongly Agree	Yes	Disagree	Disagree	Disagree	Disagree	Disagree	Agree	Agree	Disagree				Disagree
57	55	Male	Unmarried	Diploma	Primary	Governmental	Baoan District Central Hospital	Public health care physician	4	Yes	≥11	Yes	Yes	Yes	Yes	No	A little worried	A little worried	A little worried	A little worried	Yes	Yes	Yes	No	Yes	Once or twice	Never	Never	A little worried	Not worried	Not worried	A little hesitant	Strongly Agree	Yes	Strongly Agree	Strongly Agree	Yes	Agree	Disagree	Disagree	Agree	Disagree	Disagree	Disagree	Disagree				Disagree
55	51	Male	Unmarried	High school or others	None	Governmental	Baoan District Central Hospital	Cleaning staff	1	No	0	No	No	No	No	Yes	Not applicable	Not applicable	Not applicable	Not applicable	Not applicable	Not applicable	Not applicable	Not applicable	Don’t know							Very hesitant	Disagree	Don’t Know	Disagree	Disagree	Don’t Know	Agree	Agree	Disagree	Agree	Disagree	Strongly Agree	Disagree	Agree	Agree	Disagree	Agree	Agree
181	27	Female	Married	Bachelor	Primary	Governmental	Baoan District Central Hospital	Nurse	2	No		No	Yes	No	No	No	Not worried	A little worried	A little worried	Not worried	No	Yes	Yes	Yes	Don’t know							A little hesitant	Disagree	Don’t Know	Strongly Agree	Strongly Agree	Don’t Know	Disagree	Disagree	Disagree	Disagree	Disagree	Strongly Agree	Agree	Disagree				Disagree
51	33	Female	Married	Bachelor	Intermediate	Governmental	Baoan District Central Hospital	Pharmacist	2	No		No	No	Yes	No	No	Not applicable	Not applicable	Not applicable	Not applicable	Not applicable	Not applicable	Not applicable	Not applicable	Don’t know							Not hesitant	Disagree	Don’t Know	Strongly Agree	Strongly Agree	Yes	Disagree	Disagree	Disagree	Disagree	Disagree	Agree	Agree	Disagree				Disagree
757	23	Male	Married	Bachelor	None	Governmental	Baoan District Central Hospital	Medical Records Personnel	1	No		Yes	No	Yes	No	No	A little worried	A little worried	A little worried	A little worried	Yes	Not applicable	Not applicable	No	Yes	Never	Never	Never	A little worried	A little worried	A little worried	A little hesitant	Disagree	Yes	Strongly Agree	Strongly Agree	Don’t Know	Disagree	Disagree	Disagree	Disagree	Disagree	Disagree	Agree	Disagree				Disagree
165	52	Female	Unmarried	Bachelor	Senior	Governmental	Baoan District Central Hospital	Doctor	4	No	1-5	No	Yes	Yes	No	No	A little worried	A little worried	A little worried	A little worried	No	Yes	Yes	Yes	Yes	Never	Never	Never	Not worried	Not worried	Not worried	Somewhat hesitant	Agree	Yes	Strongly Agree	Strongly Agree	Yes	Disagree	Agree	Disagree	Agree	Agree	Agree	Strongly Agree	Agree	Disagree	Agree	Disagree	Agree
121	36	Female	Unmarried	Bachelor	Intermediate	Governmental	Baoan District Central Hospital	Nurse	3	No	0	No	Yes	Yes	Yes	No	Not worried	Very worried	Very worried	Not worried	No	Yes	No	No	No							A little hesitant	Agree	No	Strongly Agree	Strongly Agree	Yes	Agree	Agree	Agree	Agree	Disagree	Agree	Agree	Disagree				Disagree
152	37	Male	Unmarried	Bachelor	Intermediate	Governmental	Baoan District Central Hospital	Medical /Laboratory Technician	2	Yes	1-5	Yes	Yes	Yes	Yes	No	A little worried	Worried	Worried	A little worried	Not applicable	Yes	No	No	Yes	Never	Never	Never	A little worried	A little worried	A little worried	A little hesitant	Disagree	Yes	Agree	Strongly Agree	Yes	Strongly Agree	Disagree	Agree	Strongly Agree	Strongly Disagree	Strongly Agree	Strongly Agree	Disagree				Disagree
44	29	Female	Unmarried	Bachelor	Intermediate	Governmental	Baoan District Central Hospital	Nurse	2	No		No	Yes	Yes	No	No	Not worried	Worried	Worried	Not worried	Yes	Yes	Yes	Yes	Yes	Never	Never	Never	Not worried	Not worried	Not worried	Not hesitant	Disagree	No	Strongly Agree	Strongly Agree	Yes	Agree	Agree	Agree	Disagree	Disagree	Agree	Agree	Disagree				Agree
111	47	Male	Unmarried	Bachelor	Senior	Governmental	Baoan District Central Hospital	Anesthetist	4	No		No	No	No	No	Yes	A little worried	Very worried	Very worried	Not worried	No	Yes	Yes	Yes	Yes	Never	Never	Never	Not worried	Not worried	Not worried	Somewhat hesitant	Disagree	Don’t Know	Disagree	Disagree	Don’t Know	Strongly Agree	Disagree	Disagree	Disagree	Disagree	Strongly Agree	Strongly Agree	Agree	Agree	Agree	Agree	Agree
119	37	Female	Unmarried	Bachelor	Intermediate	Governmental	Baoan District Central Hospital	Nurse	3	No		No	Yes	Yes	No	No	A little worried	Very worried	Worried	Not worried	No	No	Yes	No	Yes	Never	Never	Never	Not worried	Not worried	Not worried	A little hesitant	Disagree	Don’t Know	Strongly Agree	Strongly Agree	Don’t Know	Disagree	Disagree	Disagree	Agree	Disagree	Agree	Disagree	Disagree				Disagree
79	35	Female	Unmarried	Bachelor	Intermediate	Governmental	Baoan District Central Hospital	Doctor	3	No	0	Yes	Yes	Yes	No	No	Not worried	Worried	Worried	Not worried	No	Yes	Yes	Yes	Don’t know							Somewhat hesitant	Strongly Agree	Don’t Know	Strongly Agree	Strongly Agree	Yes	Agree	Disagree	Agree	Strongly Agree	Agree	Agree	Agree	Disagree				Disagree
101	33	Male	Unmarried	Bachelor	Intermediate	Governmental	Baoan District Central Hospital	Doctor	2	No		No	Yes	Yes	No	No	Worried	Not applicable	Not applicable	Worried	Not applicable	Not applicable	Not applicable	Not applicable	Don’t know							Somewhat hesitant	Disagree	Yes	Strongly Agree	Strongly Agree	Yes	Disagree	Disagree	Strongly Disagree	Agree	Strongly Disagree	Agree	Agree	Disagree				Disagree
138	42	Female	Unmarried	Bachelor	Primary	Governmental	Baoan District Central Hospital	Doctor	3	No		No	Yes	Yes	No	No	A little worried	A little worried	A little worried	Not worried	No	Yes	Yes	Yes	No							A little hesitant	Agree	Yes	Strongly Agree	Strongly Agree	Yes	Agree	Disagree	Disagree	Agree	Disagree	Strongly Agree	Strongly Agree	Strongly Agree	Agree	Agree	Agree	Disagree
117	45	Male	Unmarried	Bachelor	Senior	Governmental	Baoan District Central Hospital	Doctor	4	No		Yes	Yes	Yes	No	No	Not worried	Not worried	Not worried	Not worried	No	No	Yes	Yes	Don’t know							Not hesitant	Strongly Agree	Don’t Know	Strongly Agree	Strongly Agree	Yes	Agree	Disagree	Disagree	Disagree	Disagree	Disagree	Agree	Disagree				Disagree
49	24	Female	Married	Diploma	Primary	Governmental	Baoan District Central Hospital	Nurse	1	No	1-5	No	Yes	Yes	No	No	A little worried	A little worried	A little worried	Not worried	Not applicable	Yes	Yes	Yes	Yes	Never	Never	Never	Not worried	Not worried	Not worried	A little hesitant	Agree	Don’t Know	Disagree	Disagree	Don’t Know	Agree	Disagree	Agree	Disagree	Disagree	Agree	Agree	Disagree				Disagree
73	37	Male	Unmarried	Bachelor	Intermediate	Governmental	Baoan District Central Hospital	Medical /Laboratory Technician	3	Yes	≥11	Yes	Yes	Yes	No	No	A little worried	Very worried	Very worried	A little worried	Yes	Yes	Yes	Yes	Don’t know							Somewhat hesitant	Disagree	Yes	Strongly Agree	Strongly Agree	Yes	Agree	Disagree	Agree	Strongly Disagree	Strongly Disagree	Agree	Agree	Strongly Disagree				Strongly Disagree
98	36	Female	Unmarried	Master or higher	Intermediate	Governmental	Baoan District Central Hospital	Obstetrician and Gynecologist	2	No	0	Yes	Yes	Yes	Yes	No	Not worried	A little worried	A little worried	Not worried	No	No	No	No	No							A little hesitant	Strongly Agree	No	Strongly Agree	Strongly Agree	Yes	Agree	Disagree	Disagree	Disagree	Disagree	Disagree	Disagree	Disagree				Disagree
1317	52	Female	Unmarried	Bachelor	Senior	Governmental	Baoan District Central Hospital	Doctor	4	No		No	No	No	No	Yes	Worried	Very worried	Very worried	A little worried	Yes	Yes	Yes	Yes	Don’t know							Somewhat hesitant	Agree	Don’t Know	Disagree	Disagree	Don’t Know	Agree	Disagree	Disagree	Disagree	Disagree	Agree	Agree	Agree	Disagree	Agree	Disagree	Agree
63	55	Male	Unmarried	Bachelor	Senior	Governmental	Baoan District Central Hospital	Doctor	4	No	6-10	No	Yes	Yes	No	No	Not worried	A little worried	A little worried	Not worried	Yes	Yes	Yes	No	Yes	Once or twice	Never	Never	Not worried	Not worried	Not worried	A little hesitant	Strongly Agree	No	Agree	Strongly Agree	No	Agree	Disagree	Agree	Agree	Disagree	Agree	Agree	Disagree				Disagree
60	32	Female	Unmarried	High school or others	Primary	Governmental	Baoan District Central Hospital	Cashier	1	No	0	No	No	No	No	Yes	Not applicable	Not applicable	Not applicable	Not applicable	Not applicable	Not applicable	Yes	Not applicable	Don’t know							Somewhat hesitant	Disagree	Don’t Know	Disagree	Disagree	Yes	Disagree	Disagree	Agree	Disagree	Disagree	Agree	Agree	Disagree				Disagree
92	42	Male	Unmarried	Bachelor	Senior	Governmental	Baoan District Central Hospital	Medical /Laboratory Technician	3	No		No	Yes	Yes	No	No	Not worried	Not applicable	Not applicable	Not applicable	Not applicable	Not applicable	Not applicable	Not applicable	Don’t know							Not hesitant	Strongly Agree	Don’t Know	Strongly Agree	Strongly Agree	Yes	Disagree	Disagree	Disagree	Disagree	Disagree	Disagree	Disagree	Disagree				Disagree
65	25	Female	Married	Diploma	Primary	Governmental	Baoan District Central Hospital	Receptionist	2	No		No	Yes	Yes	No	No	A little worried	Very worried	Very worried	A little worried	Yes	Yes	Yes	Yes	Don’t know							A little hesitant	Strongly Agree	Yes	Strongly Agree	Strongly Agree	Don’t Know	Agree	Disagree	Disagree	Disagree	Disagree	Agree	Agree	Disagree				Disagree
131	30	Female	Unmarried	Bachelor	Primary	Governmental	Baoan District Central Hospital	Nurse	2	No	1-5	Yes	Yes	Yes	Yes	No	Very worried	Worried	Very worried	Worried	Yes	Yes	Yes	Yes	Yes	Never	Never	Never	Not worried	Not worried	Not worried	A little hesitant	Strongly Agree	Yes	Strongly Agree	Strongly Agree	Don’t Know	Agree	Strongly Disagree	Strongly Agree	Strongly Agree	Agree	Disagree	Strongly Agree	Disagree				Disagree
68	28	Female	Unmarried	Bachelor	Primary	Governmental	Baoan District Central Hospital	Nurse	1	No	0	No	Yes	No	No	No	A little worried	Very worried	Very worried	Not worried	Yes	No	Yes	Yes	Yes	Never	Never	Never	A little worried	A little worried	A little worried	Somewhat hesitant	Agree	No	Strongly Agree	Strongly Agree	Don’t Know	Agree	Disagree	Agree	Agree	Disagree	Agree	Strongly Agree	Disagree				Disagree
1027	24	Female	Married	Diploma	Primary	Governmental	Baoan District Central Hospital	Nurse	1	No	1-5	No	Yes	Yes	No	No	A little worried	Very worried	Worried	Not worried	No	Yes	No	No	Yes	Never	Never	Never	Not worried	Not worried	Not worried	A little hesitant	Agree	Don’t Know	Agree	Agree	No	Agree	Disagree	Agree	Agree	Disagree	Agree	Agree	Disagree				Disagree
30	22	Female	Married	Diploma	None	Governmental	Baoan District Central Hospital	Nurse	1	No	0	No	Yes	Yes	Yes	No	Not applicable	Very worried	Very worried	A little worried	Yes	Yes	Yes	Yes	Yes	Once or twice	Never	Never	A little worried	A little worried	A little worried	Very hesitant	Disagree	Yes	Strongly Agree	Strongly Agree	Don’t Know	Strongly Agree	Disagree	Strongly Disagree	Disagree	Disagree	Strongly Agree	Strongly Agree	Disagree				Disagree
91	50	Male	Unmarried	Master or higher	Senior	Governmental	Baoan District Central Hospital	Doctor	4	No		No	Yes	No	No	No	Not worried	A little worried	A little worried	Not worried	No	No	No	No	Yes	Never	Never	Never	Not worried	Not worried	Not worried	A little hesitant	Strongly Agree	Yes	Strongly Agree	Strongly Agree	Yes	Disagree	Disagree	Strongly Disagree	Disagree	Disagree	Disagree	Disagree	Disagree				Disagree
89	28	Female	Unmarried	Bachelor	Primary	Governmental	Baoan District Central Hospital	Midwife	2	No	1-5	No	Yes	Yes	No	No	Not worried	A little worried	A little worried	Not worried	No	Yes	Yes	Yes	Yes	Never	Never	Never	Not worried	Not worried	Not worried	Not hesitant	Agree	Yes	Strongly Agree	Strongly Agree	Yes	Agree	Disagree	Disagree	Disagree	Disagree	Disagree	Agree	Disagree				Disagree
150	22	Female	Married	Diploma	None	Governmental	Baoan District Central Hospital	Nurse	1	No		No	Yes	Yes	No	No	A little worried	Worried	Very worried	Not worried	No	Yes	No	Yes	Yes	Never	Never	Never	Not worried	Not worried	Not worried	Not hesitant	Disagree	No	Strongly Agree	Strongly Agree	Yes	Disagree	Strongly Disagree	Disagree	Disagree	Disagree	Agree	Disagree	Disagree				Disagree
75	41	Male	Unmarried	High school or others	None	Governmental	Baoan District Central Hospital	Cleaning staff	1	No	0	No	Yes	Yes	No	No	Not worried	Not worried	Not worried	Not worried	Not applicable	Yes	Yes	Yes	Don’t know							A little hesitant	Disagree	Don’t Know	Strongly Agree	Strongly Agree	Don’t Know	Agree	Disagree	Disagree	Disagree	Disagree	Agree	Agree	Disagree				Disagree
35	45	Male	Divorced	Master or higher	Senior	Governmental	Baoan District Central Hospital	Public health care physician	1	No		No	Yes	Yes	No	No	Not applicable	Not applicable	Not applicable	Not applicable	Not applicable	Not applicable	Not applicable	Not applicable	Don’t know							A little hesitant	Strongly Agree	Yes	Strongly Agree	Strongly Agree	No	Disagree	Disagree	Disagree	Disagree	Disagree	Disagree	Disagree	Disagree				Disagree
54	37	Male	Unmarried	Bachelor	Senior	Governmental	Baoan District Central Hospital	Doctor	3	No	1-5	No	Yes	Yes	No	No	Not worried	Not worried	Not worried	Not worried	Yes	No	Yes	Not applicable	Yes	Never	Never	Never	Not worried	Not worried	Not worried	Somewhat hesitant	Strongly Agree	Don’t Know	Strongly Agree	Strongly Agree	Yes	Disagree	Disagree	Disagree	Agree	Disagree	Agree	Strongly Agree	Agree	Agree	Agree	Disagree	Agree
28	36	Male	Unmarried	Bachelor	Intermediate	Governmental	Baoan District Central Hospital	Doctor	2	No	0	No	Yes	Yes	No	No	A little worried	Worried	Not applicable	Not applicable	No	No	Yes	Yes	Yes	Never	Never	Never	Not worried	Not worried	Not worried	A little hesitant	Agree	Don’t Know	Strongly Agree	Strongly Agree	Don’t Know	Disagree	Agree	Disagree	Disagree	Strongly Disagree	Disagree	Agree	Disagree				Disagree
142	30	Male	Unmarried	Bachelor	Primary	Governmental	Baoan District Central Hospital	Doctor	1	No		Yes	Yes	Yes	Yes	No	Not worried	A little worried	A little worried	A little worried	Yes	Yes	Yes	Yes	Yes	Never	Never	Never	Not worried	Not worried	Not worried	A little hesitant	Agree	No	Strongly Agree	Strongly Agree	Yes	Disagree	Disagree	Agree	Disagree	Disagree	Strongly Agree	Strongly Agree	Disagree				Agree
228	40	Male	Unmarried	Bachelor	Primary	Governmental	Baoan District Central Hospital	Medical /Laboratory Technician	3	No		No	Yes	Yes	No	No	A little worried	Worried	Worried	Not worried	No	No	No	No	Don’t know							A little hesitant	Agree	No	Strongly Agree	Strongly Agree	Yes	Agree	Disagree	Disagree	Agree	Disagree	Agree	Agree	Strongly Disagree				Disagree
32	35	Male	Unmarried	Bachelor	Intermediate	Governmental	Baoan District Central Hospital	Doctor	3	No		Yes	No	Yes	No	No	Not worried	A little worried	A little worried	Not worried	No	No	Yes	No	No							Not hesitant	Strongly Agree	No	Strongly Agree	Strongly Agree	No	Agree	Disagree	Strongly Disagree	Agree	Disagree	Disagree	Agree	Disagree				Disagree
84	26	Male	Married	Bachelor	None	Governmental	Baoan District Central Hospital	Pharmacist	1	No		No	Yes	No	No	No	Not applicable	Not applicable	Not applicable	Not applicable	Not applicable	Not applicable	Not applicable	Not applicable	Don’t know							Not hesitant	Disagree	Don’t Know	Disagree	Disagree	Don’t Know	Disagree	Disagree	Disagree	Disagree	Disagree	Disagree	Disagree	Disagree				Disagree
61	48	Male	Unmarried	High school or others	None	Governmental	Baoan District Central Hospital	Security Guard	1	No		Yes	Yes	Yes	Yes	No	Not applicable	Not worried	Not worried	Not worried	Not applicable	Not applicable	Not applicable	Not applicable	Don’t know							Very hesitant	Disagree	Don’t Know	Disagree	Disagree	Don’t Know	Disagree	Disagree	Disagree	Disagree	Disagree	Agree	Agree	Disagree				Disagree
115	43	Female	Unmarried	Bachelor	Senior	Governmental	Baoan District Central Hospital	Anesthetist	3	No		No	Yes	No	Yes	No	Very worried	Very worried	Very worried	Not worried	No	Yes	Yes	Yes	Don’t know							Somewhat hesitant	Agree	Yes	Strongly Agree	Strongly Agree	Don’t Know	Agree	Agree	Agree	Agree	Disagree	Disagree	Agree	Agree	Agree	Agree	Disagree	Agree
38	26	Female	Married	Bachelor	Primary	Governmental	Baoan District Central Hospital	Nurse	1	No	1-5	No	Yes	Yes	No	No	A little worried	A little worried	A little worried	Not worried	No	No	Yes	No	Yes	Never	Never	Never	Not worried	Not worried	Not worried	Not hesitant	Disagree	Don’t Know	Strongly Agree	Strongly Agree	Yes	Disagree	Strongly Disagree	Strongly Disagree	Disagree	Strongly Disagree	Disagree	Disagree	Disagree				Disagree
80	50	Female	Unmarried	Bachelor	Senior	Governmental	Baoan District Central Hospital	Medical /Laboratory Technician	4	No	0	No	Yes	Yes	No	No	A little worried	A little worried	Not applicable	Not worried	No	Yes	Yes	Yes	Don’t know							Not hesitant	Strongly Agree	Yes	Strongly Agree	Strongly Agree	Yes	Disagree	Agree	Disagree	Disagree	Disagree	Disagree	Agree	Agree	Disagree	Disagree	Agree	Disagree
985	39	Male	Unmarried	Bachelor	Intermediate	Governmental	Baoan District Central Hospital	Medical /Laboratory Technician	3	Yes	≥11	Yes	Yes	Yes	Yes	No	Not worried	Not worried	A little worried	Not worried	No	No	No	No	Yes	Never	Never	Never	Not worried	Not worried	Not worried	A little hesitant	Agree	Yes	Strongly Agree	Strongly Agree	Yes	Disagree	Strongly Disagree	Strongly Disagree	Strongly Disagree	Strongly Disagree	Strongly Disagree	Strongly Disagree	Strongly Disagree				Strongly Disagree
58	48	Female	Unmarried	Bachelor	Senior	Governmental	Baoan District Central Hospital	Doctor	4	No	0	No	Yes	Yes	No	No	A little worried	A little worried	Not applicable	Not worried	No	No	No	No	Yes	Never	Never	Never	Not worried	Not worried	Not worried	Not hesitant	Strongly Agree	Don’t Know	Strongly Agree	Strongly Agree	Yes	Agree	Disagree	Agree	Disagree	Disagree	Agree	Agree	Disagree				Disagree
70	19	Female	Married	Diploma	None	Governmental	Baoan District Central Hospital	Cleaning staff	1	No		No	Yes	Yes	No	No	Not applicable	Not applicable	Not applicable	Not applicable	Not applicable	Not applicable	Not applicable	Not applicable	Don’t know							Somewhat hesitant	Disagree	Don’t Know	Disagree	Disagree	Don’t Know	Agree	Disagree	Agree	Strongly Agree	Strongly Agree	Strongly Agree	Strongly Agree	Disagree				Disagree
1060	62	Male	Unmarried	High school or others	None	Governmental	Baoan District Central Hospital	Cleaning staff	1	No		No	Yes	Yes	No	No	Not worried	Not applicable	Not applicable	Not applicable	Not applicable	Yes	Yes	Yes	Don’t know							A little hesitant	Disagree	No	Strongly Agree	Strongly Agree	Yes	Agree	Disagree	Agree	Agree	Disagree	Agree	Agree	Disagree				Disagree
141	37	Female	Unmarried	Diploma	None	Governmental	Baoan District Central Hospital	Medical Records Personnel	3	No		No	No	No	No	Yes	A little worried	Not applicable	Not applicable	Not applicable	Yes	Yes	Yes	Yes	Don’t know							Very hesitant	Disagree	Don’t Know	Strongly Agree	Strongly Agree	Don’t Know	Agree	Disagree	Agree	Agree	Agree	Agree	Strongly Agree	Agree	Disagree	Agree	Agree	Agree
118	24	Female	Married	Diploma	Primary	Governmental	Baoan District Central Hospital	Nurse	1	No		No	Yes	Yes	No	No	A little worried	Very worried	Very worried	Not worried	No	Yes	No	Yes	Don’t know							A little hesitant	Disagree	Don’t Know	Strongly Agree	Strongly Agree	Don’t Know	Disagree	Disagree	Disagree	Disagree	Disagree	Strongly Agree	Strongly Agree	Agree	Agree	Agree	Agree	Disagree
39	27	Female	Married	Bachelor	Primary	Governmental	Baoan District Central Hospital	Nurse	1	No	6-10	No	No	No	No	Yes	Very worried	Very worried	Very worried	Very worried	Yes	Yes	Yes	Yes	Yes	Several times	Several times	Never	Very worried	Very worried	Very worried	Very hesitant	Strongly Agree	No	Strongly Agree	Strongly Agree	Yes	Agree	Agree	Agree	Agree	Agree	Agree	Agree	Strongly Agree	Agree	Agree	Agree	Disagree
99	22	Female	Married	Diploma	None	Governmental	Baoan District Central Hospital	Nurse	1	No	0	No	Yes	No	No	No	Very worried	Not applicable	Not applicable	Not applicable	Not applicable	Yes	Yes	Yes	Don’t know							A little hesitant	Disagree	Don’t Know	Disagree	Disagree	Don’t Know	Agree	Disagree	Disagree	Agree	Disagree	Strongly Agree	Agree	Disagree				Disagree
994	28	Female	Married	Bachelor	Primary	Governmental	Baoan District Central Hospital	Nurse	1	No		Yes	Yes	Yes	Yes	No	Not worried	Not worried	A little worried	Not worried	No	Yes	Yes	Yes	Don’t know							Not hesitant	Agree	No	Strongly Agree	Strongly Agree	No	Disagree	Strongly Disagree	Strongly Disagree	Strongly Disagree	Strongly Disagree	Strongly Disagree	Agree	Disagree				Disagree
1023	49	Male	Unmarried	High school or others	None	Governmental	Baoan District Central Hospital	Cleaning staff	1	No		No	Yes	No	No	No	Not worried	Not applicable	Not applicable	Not applicable	Not applicable	Yes	Yes	Yes	Don’t know							A little hesitant	Disagree	No	Strongly Agree	Strongly Agree	Yes	Disagree	Disagree	Agree	Agree	Disagree	Disagree	Agree	Disagree				Disagree
86	36	Male	Unmarried	Bachelor	Intermediate	Governmental	Baoan District Central Hospital	Doctor	3	No		No	No	No	No	Yes	Not worried	A little worried	Not worried	Not worried	No	No	Yes	Yes	No							A little hesitant	Strongly Agree	Don’t Know	Disagree	Disagree	Don’t Know	Disagree	Disagree	Disagree	Agree	Strongly Disagree	Agree	Disagree	Agree	Disagree	Disagree	Agree	Disagree
22	38	Female	Unmarried	Bachelor	Intermediate	Governmental	Baoan District Central Hospital	Nurse	3	No		No	Yes	No	No	No	A little worried	A little worried	A little worried	Not worried	Yes	Yes	Yes	Yes	Don’t know							Somewhat hesitant	Agree	No	Strongly Agree	Strongly Agree	No	Agree	Disagree	Disagree	Disagree	Disagree	Disagree	Agree	Disagree				Disagree
120	26	Male	Married	Diploma	Primary	Governmental	Baoan District Central Hospital	Doctor	1	No		No	No	Yes	Yes	No	Not applicable	Not applicable	Not applicable	Not applicable	Not applicable	Not applicable	Not applicable	Not applicable	Don’t know							Somewhat hesitant	Disagree	Don’t Know	Disagree	Disagree	Don’t Know	Strongly Disagree	Strongly Disagree	Strongly Disagree	Strongly Disagree	Strongly Disagree	Strongly Agree	Agree	Strongly Disagree				Strongly Disagree
1375	23	Male	Unmarried	Diploma	None	Governmental	Baoan District Central Hospital	Medical Records Personnel	1	No	1-5	No	No	No	No	Yes	Worried	Worried	Very worried	Not worried	Yes	Yes	Yes	No	Don’t know							Not hesitant	Disagree	Don’t Know	Disagree	Disagree	Don’t Know	Disagree	Disagree	Disagree	Disagree	Disagree	Agree	Agree	Disagree				Disagree
37	43	Male	Unmarried	Bachelor	Senior	Governmental	Baoan District Central Hospital	Doctor	4	No		No	Yes	No	No	No	Not worried	Worried	Not worried	Not worried	Yes	No	Yes	Yes	Don’t know							A little hesitant	Disagree	Yes	Strongly Agree	Strongly Agree	Don’t Know	Disagree	Strongly Disagree	Disagree	Strongly Disagree	Strongly Disagree	Disagree	Agree	Disagree				Disagree
110	28	Female	Unmarried	Bachelor	Primary	Governmental	Baoan District Central Hospital	Nurse	1	No		No	Yes	Yes	Yes	No	Not worried	Very worried	Very worried	Not worried	Yes	Yes	Yes	Yes	Don’t know							A little hesitant	Disagree	Don’t Know	Disagree	Strongly Agree	Don’t Know	Agree	Strongly Disagree	Disagree	Disagree	Disagree	Agree	Agree	Disagree				Disagree
1048	35	Female	Unmarried	Diploma	Intermediate	Governmental	Baoan District Central Hospital	Nurse	3	No	0	No	Yes	No	No	No	A little worried	A little worried	Worried	A little worried	Yes	Yes	Yes	Yes	Yes	Never	Never	Never	A little worried	A little worried	A little worried	A little hesitant	Strongly Agree	Don’t Know	Strongly Agree	Strongly Agree	Don’t Know	Agree	Disagree	Disagree	Disagree	Disagree	Agree	Agree	Disagree				Disagree
109	39	Male	Unmarried	Bachelor	Senior	Governmental	Baoan District Central Hospital	Medical /Laboratory Technician	4	No		No	Yes	No	No	No	Not worried	Not applicable	A little worried	Not applicable	No	No	Yes	No	Yes	Never	Never	Never	Not worried	Not worried	Not worried	Not hesitant	Strongly Agree	Don’t Know	Strongly Agree	Strongly Agree	Don’t Know	Agree	Disagree	Disagree	Strongly Disagree	Strongly Disagree	Strongly Disagree	Agree	Disagree				Disagree
1052	53	Female	Widowed	High school or others	None	Governmental	Baoan District Central Hospital	Cleaning staff	1	No		No	Yes	Yes	No	No	Not worried	Not applicable	Not applicable	Not applicable	Not applicable	Yes	Yes	Yes	Don’t know							A little hesitant	Disagree	Don’t Know	Strongly Agree	Strongly Agree	Yes	Agree	Disagree	Agree	Disagree	Agree	Agree	Agree	Disagree				Disagree
1033	51	Female	Unmarried	High school or others	None	Governmental	Baoan District Central Hospital	Cleaning staff	1	No		No	Yes	Yes	No	No	Not worried	Not applicable	Not applicable	Not applicable	Not applicable	Yes	Not applicable	Not applicable	Don’t know							A little hesitant	Disagree	No	Strongly Agree	Strongly Agree	Yes	Agree	Disagree	Agree	Agree	Disagree	Disagree	Agree	Disagree				Disagree
1040	30	Female	Unmarried	Diploma	Intermediate	Governmental	Baoan District Central Hospital	Nurse	2	No	≥11	No	Yes	No	No	No	Worried	A little worried	Worried	A little worried	Yes	Yes	Yes	Yes	Yes	Once or twice	Never	Never	A little worried	A little worried	A little worried	A little hesitant	Strongly Agree	No	Strongly Agree	Strongly Agree	Yes	Agree	Disagree	Disagree	Disagree	Disagree	Agree	Agree	Disagree				Disagree
1138	22	Female	Married	Diploma	None	Governmental	Baoan District Central Hospital	Receptionist	1	No	0	No	Yes	No	No	No	Not applicable	Not applicable	Not applicable	Not applicable	Not applicable	Not applicable	Not applicable	Not applicable	Don’t know							Somewhat hesitant	Disagree	Don’t Know	Disagree	Disagree	Don’t Know	Disagree	Disagree	Strongly Disagree	Agree	Disagree	Disagree	Agree	Disagree				Disagree
100	36	Female	Unmarried	Bachelor	Intermediate	Governmental	Baoan District Central Hospital	Nurse	2	No	1-5	No	Yes	Yes	No	No	A little worried	A little worried	A little worried	Not worried	Yes	No	Yes	Yes	Yes	Never	Never	Never	Not worried	Not worried	Not worried	A little hesitant	Disagree	No	Disagree	Disagree	Don’t Know	Agree	Disagree	Disagree	Strongly Disagree	Disagree	Agree	Agree	Disagree				Disagree
132	50	Male	Unmarried	Bachelor	Senior	Governmental	Baoan District Central Hospital	Doctor	4	No		Yes	Yes	Yes	Yes	No	Not worried	Not worried	Not worried	Not worried	No	No	Yes	Yes	Don’t know							A little hesitant	Strongly Agree	Yes	Strongly Agree	Strongly Agree	Yes	Agree	Agree	Disagree	Agree	Disagree	Agree	Agree	Disagree				Disagree
946	35	Male	Unmarried	Bachelor	Primary	Governmental	Baoan District Central Hospital	Doctor	1	No	0	No	Yes	No	Yes	No	A little worried	Not worried	A little worried	A little worried	No	Yes	Yes	No	Yes	Once or twice	Several times	Once or twice	Not worried	Not worried	Worried	A little hesitant	Strongly Agree	Yes	Strongly Agree	Agree	No	Agree	Disagree	Agree	Agree	Agree	Agree	Agree	Agree	Disagree	Agree	Agree	Agree
241	26	Male	Married	Bachelor	None	Governmental	Baoan District Central Hospital	Nurse	1	No	1-5	No	Yes	No	No	No	A little worried	Worried	Worried	Not worried	No	Yes	Yes	No	Don’t know							A little hesitant	Disagree	Don’t Know	Disagree	Disagree	Don’t Know	Agree	Disagree	Disagree	Strongly Disagree	Strongly Disagree	Disagree	Agree	Disagree				Disagree
1045	23	Male	Married	Diploma	Intermediate	Governmental	Baoan District Central Hospital	Medical /Laboratory Technician	2	No	6-10	No	No	Yes	No	No	A little worried	A little worried	A little worried	A little worried	No	No	Yes	Yes	Don’t know							Not hesitant	Strongly Agree	Yes	Strongly Agree	Strongly Agree	Yes	Strongly Agree	Disagree	Disagree	Strongly Agree	Strongly Agree	Agree	Disagree	Agree	Agree	Disagree	Agree	Disagree
820	27	Female	Unmarried	Diploma	Primary	Governmental	Baoan District Central Hospital	Receptionist	1	No	1-5	No	Yes	No	No	No	Not worried	A little worried	Very worried	Not worried	Yes	Yes	Yes	Yes	Don’t know							A little hesitant	Agree	Yes	Strongly Agree	Strongly Agree	Don’t Know	Strongly Agree	Disagree	Strongly Disagree	Strongly Disagree	Strongly Disagree	Strongly Agree	Agree	Disagree				Disagree
536	22	Female	Married	Diploma	Primary	Private	Shenzhen Baosheng Maternity Hospital	Medical /Laboratory Technician	1	Yes	0	Yes	Yes	Yes	Yes	Yes	Worried	A little worried	A little worried	Not worried	Yes	Yes	Yes	Yes	Yes	Once or twice	Never	Never	Not worried	Not worried	Not worried	Somewhat hesitant	Strongly Agree	Yes	Strongly Agree	Strongly Agree	Yes	Strongly Agree	Agree	Disagree	Disagree	Agree	Agree	Agree	Disagree				Agree
429	23	Female	Married	Diploma	Primary	Private	Shenzhen Baosheng Maternity Hospital	Medical /Laboratory Technician	1	Yes		No	Yes	Yes	No	No	Not worried	Not worried	Not worried	Not worried	No	No	No	Yes	Don’t know							Not hesitant	Strongly Agree	Don’t Know	Strongly Agree	Strongly Agree	Yes	Strongly Disagree	Strongly Disagree	Strongly Disagree	Strongly Disagree	Strongly Disagree	Strongly Disagree	Agree	Strongly Disagree				Strongly Disagree
652	28	Female	Married	Diploma	Primary	Private	Shenzhen Baosheng Maternity Hospital	Nurse	1	No	1-5	No	No	No	No	Yes	Not worried	Very worried	Very worried	Not worried	No	Yes	No	Yes	Yes	Never	Never	Never	Not worried	Not worried	A little worried	Not hesitant	Strongly Agree	No	Disagree	Disagree	Don’t Know	Agree	Disagree	Disagree	Disagree	Disagree	Disagree	Disagree	Agree	Agree	Disagree	Disagree	Disagree
367	65	Female	Unmarried	Bachelor	Senior	Private	Shenzhen Baosheng Maternity Hospital	Obstetrician and Gynecologist	4	Yes	0	Yes	Yes	Yes	Yes	No	A little worried	Not applicable	Not applicable	Not applicable	Yes	Yes	Yes	Yes	Don’t know							A little hesitant	Agree	Don’t Know	Strongly Agree	Strongly Agree	Yes	Agree	Disagree	Strongly Disagree	Strongly Disagree	Disagree	Agree	Agree	Disagree				Disagree
198	55	Female	Unmarried	Bachelor	Intermediate	Private	Shenzhen Baosheng Maternity Hospital	Obstetrician and Gynecologist	4	No	1-5	Yes	Yes	Yes	Yes	No	A little worried	Very worried	A little worried	Not worried	No	Yes	Yes	Yes	Yes	Never	Never	Never	Not worried	Not worried	Not worried	A little hesitant	Strongly Agree	Yes	Strongly Agree	Strongly Agree	Yes	Disagree	Disagree	Disagree	Disagree	Disagree	Agree	Agree	Disagree				Disagree
633	33	Female	Married	Bachelor	Primary	Private	Shenzhen Baosheng Maternity Hospital	Medical /Laboratory Technician	2	No	0	Yes	Yes	Yes	Yes	No	Not worried	A little worried	A little worried	Not worried	No	Yes	Yes	Yes	No							A little hesitant	Strongly Agree	Yes	Strongly Agree	Strongly Agree	No	Agree	Disagree	Disagree	Disagree	Disagree	Agree	Strongly Agree	Disagree				Disagree
651	42	Female	Unmarried	Diploma	Intermediate	Private	Shenzhen Baosheng Maternity Hospital	Pharmacist	2	No		No	Yes	No	No	No	A little worried	Not applicable	Not applicable	Not applicable	Yes	Yes	Not applicable	Yes	Don’t know							Not hesitant	Strongly Agree	No	Strongly Agree	Agree	No	Strongly Disagree	Disagree	Strongly Disagree	Disagree	Strongly Disagree	Agree	Disagree	Strongly Disagree				Strongly Disagree
654	22	Female	Married	Diploma	None	Private	Shenzhen Baosheng Maternity Hospital	Nursing worker	1	No	1-5	No	Yes	Yes	Yes	No	A little worried	A little worried	A little worried	Not worried	No	Yes	Yes	Yes	Yes	Never	Never	Never	Not worried	Not worried	Not worried	A little hesitant	Disagree	Yes	Strongly Agree	Strongly Agree	Yes	Disagree	Disagree	Disagree	Disagree	Disagree	Agree	Agree	Disagree				Disagree
391	41	Female	Unmarried	High school or others	Primary	Private	Shenzhen Baosheng Maternity Hospital	Nurse	2	No	0	Yes	Yes	Yes	Yes	No	A little worried	Very worried	A little worried	Not worried	Yes	Yes	Yes	Yes	Yes	Never	Never	Never	Not worried	Not worried	Not worried	Somewhat hesitant	Strongly Agree	Yes	Strongly Agree	Strongly Agree	Yes	Disagree	Agree	Disagree	Disagree	Disagree	Agree	Agree	Agree	Agree	Agree	Agree	Agree
424	24	Female	Married	Bachelor	Primary	Private	Shenzhen Baosheng Maternity Hospital	Medical /Laboratory Technician	1	No		Yes	Yes	No	No	No	A little worried	A little worried	A little worried	A little worried	Yes	Yes	Yes	Yes	No							Not hesitant	Agree	Yes	Strongly Agree	Strongly Agree	Yes	Disagree	Disagree	Disagree	Disagree	Disagree	Disagree	Strongly Agree	Disagree				Disagree
425	21	Female	Married	Diploma	Primary	Private	Shenzhen Baosheng Maternity Hospital	Medical /Laboratory Technician	1	No		Yes	Yes	No	No	No	A little worried	A little worried	A little worried	A little worried	Yes	Yes	Yes	Yes	No							Not hesitant	Agree	Yes	Strongly Agree	Strongly Agree	Yes	Disagree	Disagree	Disagree	Disagree	Disagree	Disagree	Strongly Agree	Disagree				Disagree
648	67	Male	Unmarried	High school or others	Intermediate	Private	Shenzhen Baosheng Maternity Hospital	Doctor	4	No		Yes	Yes	Yes	No	No	Not worried	A little worried	Worried	Not worried	No	Not applicable	Not applicable	Yes	Don’t know							Not hesitant	Disagree	Yes	Strongly Agree	Strongly Agree	Yes	Agree	Strongly Agree	Disagree	Strongly Disagree	Strongly Disagree	Agree	Disagree	Disagree				Disagree
649	34	Female	Unmarried	Bachelor	Primary	Private	Shenzhen Baosheng Maternity Hospital	Obstetrician and Gynecologist	3	No		No	No	No	No	Yes	Very worried	Not applicable	Not applicable	Not applicable	Not applicable	Not applicable	Not applicable	Not applicable	Don’t know							Somewhat hesitant	Disagree	Don’t Know	Disagree	Disagree	Don’t Know	Strongly Disagree	Strongly Disagree	Disagree	Disagree	Disagree	Strongly Disagree	Disagree	Strongly Disagree				Strongly Disagree
646	50	Female	Unmarried	High school or others	Intermediate	Private	Shenzhen Baosheng Maternity Hospital	Nurse	4	No		No	Yes	No	No	No	Not worried	A little worried	Worried	Not worried	Not applicable	Not applicable	Not applicable	Yes	Don’t know							Not hesitant	Disagree	Yes	Strongly Agree	Strongly Agree	Yes	Agree	Strongly Agree	Disagree	Strongly Disagree	Strongly Disagree	Agree	Disagree	Disagree				Disagree
643	27	Female	Unmarried	High school or others	None	Private	Shenzhen Baosheng Maternity Hospital	Receptionist	1	No		No	Yes	Yes	No	No	Not worried	Not worried	Not worried	Not worried	No	No	Yes	Yes	No							Not hesitant	Strongly Agree	Don’t Know	Strongly Agree	Strongly Agree	Yes	Disagree	Disagree	Strongly Disagree	Strongly Disagree	Strongly Disagree	Strongly Disagree	Disagree	Strongly Disagree				Strongly Disagree
343	22	Female	Married	Diploma	None	Private	Shenzhen Baosheng Maternity Hospital	Receptionist	1	No		No	Yes	No	No	No	Not worried	Very worried	Very worried	A little worried	Yes	Yes	Yes	Yes	Yes	Never	Never	Never	Not worried	Not worried	Not worried	Not hesitant	Strongly Agree	Don’t Know	Strongly Agree	Strongly Agree	Yes	Disagree	Disagree	Disagree	Disagree	Disagree	Agree	Agree	Disagree				Disagree
642	38	Female	Unmarried	High school or others	None	Private	Shenzhen Baosheng Maternity Hospital	Receptionist	1	No		No	Yes	Yes	No	No	A little worried	A little worried	A little worried	Not worried	No	Yes	Yes	Yes	No							Not hesitant	Strongly Agree	Don’t Know	Strongly Agree	Strongly Agree	Yes	Agree	Strongly Disagree	Strongly Disagree	Strongly Disagree	Strongly Disagree	Strongly Agree	Strongly Disagree	Strongly Disagree				Strongly Disagree
347	57	Female	Unmarried	Diploma	Primary	Private	Shenzhen Baosheng Maternity Hospital	Nurse	4	No	1-5	No	No	No	No	Yes	Worried	Very worried	Very worried	A little worried	Not applicable	Yes	Yes	Yes	Don’t know							Not hesitant	Agree	Yes	Strongly Agree	Strongly Agree	No	Disagree	Disagree	Disagree	Disagree	Disagree	Disagree	Agree	Disagree				Disagree
193	55	Female	Unmarried	Diploma	Senior	Private	Shenzhen Baosheng Maternity Hospital	Nurse	4	No	0	Yes	Yes	Yes	No	No	Not worried	Very worried	A little worried	Not worried	No	Yes	Yes	Yes	Yes	Never	Never	Never	Not worried	Not worried	Not worried	A little hesitant	Strongly Agree	Yes	Strongly Agree	Strongly Agree	Yes	Disagree	Disagree	Disagree	Disagree	Disagree	Agree	Agree	Disagree				Disagree
663	40	Female	Unmarried	High school or others	None	Private	Shenzhen Baosheng Maternity Hospital	Cashier	2	No		Yes	Yes	Yes	No	No	Not worried	A little worried	A little worried	Not worried	No	No	No	Yes	No							Not hesitant	Strongly Agree	Yes	Strongly Agree	Strongly Agree	Yes	Agree	Disagree	Disagree	Disagree	Disagree	Disagree	Agree	Disagree				Disagree
552	49	Female	Divorced	Diploma	Primary	Private	Shenzhen Baosheng Maternity Hospital	Medical /Laboratory Technician	4	No	1-5	No	No	Yes	No	No	A little worried	A little worried	A little worried	Not worried	Yes	Yes	Yes	Yes	Yes	Never	Never	Never	Not worried	Not worried	Not worried	Not hesitant	Strongly Agree	No	Disagree	Disagree	Yes	Disagree	Disagree	Disagree	Strongly Agree	Strongly Agree	Disagree	Strongly Agree	Disagree				Disagree
641	50	Female	Unmarried	Bachelor	Primary	Private	Shenzhen Baosheng Maternity Hospital	Obstetrician and Gynecologist	4	No	0	Yes	Yes	Yes	No	No	Not worried	Worried	Worried	Not worried	No	No	No	Yes	No							Not hesitant	Strongly Agree	No	Strongly Agree	Strongly Agree	Yes	Agree	Disagree	Disagree	Disagree	Disagree	Agree	Agree	Disagree				Disagree
378	61	Female	Unmarried	Diploma	Senior	Private	Shenzhen Baosheng Maternity Hospital	Obstetrician and Gynecologist	4	No		No	Yes	No	No	No	A little worried	A little worried	Not applicable	Not applicable	Not applicable	Yes	Yes	Yes	Don’t know							Not hesitant	Disagree	No	Strongly Agree	Disagree	No	Agree	Disagree	Agree	Disagree	Disagree	Agree	Agree	Disagree				Strongly Disagree
645	24	Female	Married	Diploma	None	Private	Shenzhen Baosheng Maternity Hospital	Public health care physician	1	No		Yes	Yes	Yes	No	No	Not worried	Not worried	Not worried	Not worried	No	No	No	Yes	No							Not hesitant	Agree	Yes	Strongly Agree	Strongly Agree	Yes	Agree	Disagree	Disagree	Disagree	Disagree	Disagree	Agree	Disagree				Disagree
415	60	Female	Unmarried	Diploma	Senior	Private	Shenzhen Baosheng Maternity Hospital	Medical /Laboratory Technician	4	Yes	1-5	No	Yes	Yes	No	No	A little worried	Not worried	Not worried	Not worried	Yes	Yes	Yes	Yes	Yes	Never	Never	Never	Not worried	Not worried	Not worried	Not hesitant	Strongly Agree	No	Strongly Agree	Strongly Agree	Yes	Disagree	Disagree	Agree	Disagree	Disagree	Agree	Agree	Agree	Agree	Agree	Disagree	Agree
655	48	Female	Unmarried	High school or others	None	Private	Shenzhen Baosheng Maternity Hospital	Cleaning staff	1	No	0	Yes	Yes	Yes	No	No	Not worried	Not applicable	Not applicable	Not worried	No	No	Yes	Yes	No							A little hesitant	Agree	Yes	Strongly Agree	Strongly Agree	Yes	Disagree	Agree	Disagree	Disagree	Strongly Disagree	Disagree	Agree	Agree	Disagree	Agree	Agree	Disagree
664	23	Female	Married	High school or others	None	Private	Shenzhen Baosheng Maternity Hospital	Midwife	1	No		No	No	No	No	Yes	Not worried	Not worried	A little worried	Not worried	No	Yes	Yes	No	Don’t know							Not hesitant	Agree	Yes	Strongly Agree	Strongly Agree	Don’t Know	Agree	Disagree	Strongly Disagree	Disagree	Disagree	Agree	Agree	Disagree				Disagree
644	28	Female	Married	Diploma	Primary	Private	Shenzhen Baosheng Maternity Hospital	Public health care physician	1	No		No	Yes	Yes	No	No	A little worried	Very worried	Very worried	Not worried	No	Yes	Yes	Yes	No							Very hesitant	Agree	No	Strongly Agree	Strongly Agree	Yes	Strongly Disagree	Disagree	Agree	Strongly Disagree	Disagree	Strongly Agree	Strongly Agree	Agree	Disagree	Agree	Disagree	Disagree
361	51	Female	Married	Bachelor	Primary	Private	Shenzhen Baosheng Maternity Hospital	Obstetrician and Gynecologist	3	No		Yes	Yes	Yes	Yes	No	Not worried	Not worried	Not worried	Not worried	No	Yes	Yes	Yes	Don’t know							Somewhat hesitant	Strongly Agree	Yes	Strongly Agree	Strongly Agree	Yes	Agree	Disagree	Agree	Agree	Disagree	Agree	Agree	Disagree				Disagree
345	50	Female	Unmarried	High school or others	Primary	Private	Shenzhen Baosheng Maternity Hospital	Obstetrician and Gynecologist	3	No		Yes	No	No	No	No	A little worried	A little worried	A little worried	Not worried	Not applicable	Not applicable	Yes	Yes	No							A little hesitant	Strongly Agree	Don’t Know	Strongly Agree	Strongly Agree	Yes	Disagree	Agree	Disagree	Disagree	Disagree	Agree	Agree	Disagree				Disagree
639	26	Female	Married	Diploma	Primary	Private	Shenzhen Baosheng Maternity Hospital	Nurse	1	Yes		Yes	Yes	Yes	Yes	No	Not worried	A little worried	A little worried	Not worried	No	No	No	Yes	No							Not hesitant	Strongly Agree	No	Strongly Agree	Strongly Agree	Yes	Agree	Agree	Disagree	Disagree	Disagree	Disagree	Disagree	Disagree				Disagree
202	31	Female	Married	Bachelor	None	Private	Shenzhen Baosheng Maternity Hospital	Receptionist	1	No		No	Yes	No	No	No	Not worried	A little worried	Not worried	Not worried	No	Yes	Yes	Yes	No							Somewhat hesitant	Strongly Agree	Yes	Strongly Agree	Strongly Agree	Yes	Strongly Agree	Disagree	Agree	Strongly Agree	Disagree	Disagree	Agree	Agree	Agree	Disagree	Agree	Disagree
637	女	Female	Unmarried	Diploma	Primary	Private	Shenzhen Baosheng Maternity Hospital	Nurse	2	No		Yes	Yes	Yes	No	No	A little worried	A little worried	A little worried	Not worried	No	Yes	Yes	Yes	No							Somewhat hesitant	Agree	Yes	Strongly Agree	Strongly Agree	Yes	Disagree	Disagree	Disagree	Disagree	Disagree	Disagree	Agree	Disagree				Disagree
342	25	Female	Married	Diploma	Primary	Private	Shenzhen Baosheng Maternity Hospital	Nurse	2	No		No	Yes	No	No	No	Not applicable	Not applicable	Not applicable	Not applicable	Not applicable	Not applicable	Not applicable	Yes	No							A little hesitant	Disagree	Don’t Know	Strongly Agree	Strongly Agree	Yes	Strongly Disagree	Strongly Disagree	Strongly Disagree	Strongly Disagree	Strongly Disagree	Strongly Disagree	Strongly Disagree	Strongly Disagree				Strongly Disagree
660	50	Female	Unmarried	High school or others	None	Private	Shenzhen Baosheng Maternity Hospital	Cleaning staff	2	No		No	Yes	No	No	No	Not applicable	Not applicable	Not applicable	Not applicable	Not applicable	Not applicable	Not applicable	Not applicable	Don’t know							Not hesitant	Disagree	No	Strongly Agree	Strongly Agree	Yes	Strongly Disagree	Strongly Disagree	Strongly Disagree	Disagree	Disagree	Disagree	Agree	Disagree				Disagree
450	26	Female	Married	Bachelor	Primary	Private	Shenzhen Baosheng Maternity Hospital	Midwife	1	No		Yes	Yes	Yes	Yes	No	Not worried	A little worried	Not worried	Not worried	No	Not applicable	Yes	Yes	Don’t know							A little hesitant	Strongly Agree	Don’t Know	Strongly Agree	Strongly Agree	Yes	Disagree	Disagree	Disagree	Disagree	Disagree	Agree	Strongly Agree	Disagree				Disagree
180	50	Female	Unmarried	Bachelor	Intermediate	Private	Shenzhen Baosheng Maternity Hospital	Obstetrician and Gynecologist	4	No		Yes	Yes	Yes	Yes	No	Not worried	A little worried	A little worried	Not worried	No	Yes	Yes	Yes	No							A little hesitant	Strongly Agree	Yes	Strongly Agree	Strongly Agree	Yes	Agree	Disagree	Disagree	Disagree	Disagree	Disagree	Agree	Disagree				Disagree
1117	22	Female	Married	Diploma	Primary	Private	Shenzhen Baosheng Maternity Hospital	Nurse	1	No		Yes	Yes	Yes	Yes	No	A little worried	A little worried	A little worried	A little worried	No	Yes	Yes	Yes	Don’t know							A little hesitant	Agree	Yes	Strongly Agree	Strongly Agree	Yes	Agree	Disagree	Disagree	Disagree	Disagree	Agree	Agree	Disagree				Disagree
895	20	Female	Married	High school or others	Primary	Private	Shenzhen Baosheng Maternity Hospital	Nurse	1	No		No	Yes	Yes	Yes	No	Not applicable	Worried	Worried	Not worried	Not applicable	Not applicable	Not applicable	Not applicable	Don’t know							A little hesitant	Disagree	Don’t Know	Disagree	Disagree	Don’t Know	Disagree	Disagree	Disagree	Disagree	Disagree	Agree	Agree	Disagree				Disagree
709	60	Female	Unmarried	Diploma	Intermediate	Private	Shenzhen Baosheng Maternity Hospital	Doctor	4	No		Yes	Yes	Yes	Yes	No	Not worried	Worried	Not worried	Not worried	No	No	No	Not applicable	Yes	Never	Never	Never	Not worried	Not worried	Not worried	Not hesitant	Strongly Agree	No	Strongly Agree	Strongly Agree	Yes	Disagree	Strongly Disagree	Strongly Disagree	Strongly Disagree	Strongly Disagree	Strongly Disagree	Strongly Disagree	Strongly Disagree				Strongly Disagree
636	47	Female	Unmarried	Diploma	Intermediate	Private	Shenzhen Baosheng Maternity Hospital	Obstetrician and Gynecologist	4	No		Yes	Yes	Yes	Yes	No	Not worried	A little worried	A little worried	Not worried	No	Yes	Yes	Yes	Don’t know							Somewhat hesitant	Strongly Agree	Yes	Strongly Agree	Strongly Agree	Yes	Strongly Agree	Disagree	Disagree	Disagree	Disagree	Strongly Disagree	Strongly Agree	Disagree				Disagree
210	47	Female	Unmarried	High school or others	None	Private	Shenzhen Baosheng Maternity Hospital	Public health care physician	2	No		Yes	Yes	Yes	No	No	Not worried	Not worried	Not worried	Not worried	No	Yes	Yes	Yes	No							Not hesitant	Agree	Yes	Strongly Agree	Strongly Agree	Yes	Agree	Disagree	Disagree	Disagree	Disagree	Agree	Agree	Disagree				Disagree
727	56	Male	Unmarried	Diploma	None	Private	Shenzhen Baosheng Maternity Hospital	Cleaning staff	1	No		Yes	Yes	No	No	No	A little worried	A little worried	A little worried	Not worried	Yes	Not applicable	Not applicable	Not applicable	No							A little hesitant	Agree	Don’t Know	Strongly Agree	Strongly Agree	Yes	Agree	Disagree	Disagree	Disagree	Disagree	Agree	Agree	Disagree				Disagree
672	55	Male	Unmarried	High school or others	None	Private	Shenzhen Baosheng Maternity Hospital	Cleaning staff	1	No		Yes	Yes	Yes	No	No	A little worried	A little worried	A little worried	A little worried	Not applicable	Not applicable	Not applicable	Not applicable	Yes	Never	Never	Never	Not worried	Not worried	Not worried	Not hesitant	Agree	Don’t Know	Strongly Agree	Strongly Agree	Yes	Disagree	Disagree	Disagree	Disagree	Disagree	Disagree	Disagree	Disagree				Disagree
653	25	Female	Married	Diploma	Primary	Private	Shenzhen Baosheng Maternity Hospital	Nurse	2	No	1-5	Yes	Yes	Yes	Yes	No	Worried	Very worried	Very worried	A little worried	Yes	Yes	Yes	Yes	Yes	Never	Never	Never	A little worried	Not worried	Not worried	Somewhat hesitant	Agree	No	Strongly Agree	Strongly Agree	No	Agree	Disagree	Strongly Agree	Disagree	Disagree	Agree	Agree	Disagree				Disagree
632	57	Female	Unmarried	High school or others	None	Private	Shenzhen Baosheng Maternity Hospital	Cleaning staff	1	No	0	Yes	Yes	Yes	Yes	No	Not worried	A little worried	A little worried	Not worried	Yes	Yes	Yes	Yes	No							Not hesitant	Strongly Agree	Yes	Strongly Agree	Strongly Agree	Yes	Agree	Agree	Disagree	Disagree	Disagree	Agree	Agree	Disagree				Disagree
669	30	Female	Unmarried	Diploma	Intermediate	Private	Shenzhen Baosheng Maternity Hospital	Pharmacist	3	No		No	Yes	Yes	No	No	Not applicable	Not applicable	Very worried	Very worried	No	No	Yes	Yes	No							Not hesitant	Strongly Agree	Yes	Strongly Agree	Strongly Agree	Yes	Disagree	Disagree	Disagree	Disagree	Disagree	Agree	Agree	Disagree				Agree
671	22	Female	Married	Diploma	Primary	Private	Shenzhen Baosheng Maternity Hospital	Nurse	1	No		Yes	Yes	Yes	No	No	Not worried	A little worried	Not worried	Not worried	No	No	No	Yes	No							Not hesitant	Agree	Yes	Strongly Agree	Strongly Agree	Yes	Agree	Disagree	Disagree	Disagree	Disagree	Disagree	Agree	Disagree				Disagree
657	38	Male	Unmarried	Diploma	None	Private	Shenzhen Baosheng Maternity Hospital	Cleaning staff	1	No		Yes	Yes	Yes	Yes	No	Not applicable	Not applicable	Not applicable	Not applicable	Not applicable	Yes	Not applicable	Not applicable	No							A little hesitant	Agree	No	Disagree	Strongly Agree	Yes	Agree	Disagree	Disagree	Disagree	Disagree	Agree	Strongly Agree	Agree	Disagree	Agree	Agree	Agree
650	40	Female	Unmarried	Diploma	Primary	Private	Shenzhen Baosheng Maternity Hospital	Receptionist	2	No	6-10	No	Yes	Yes	Yes	No	Very worried	Very worried	Very worried	Very worried	Not applicable	Not applicable	Not applicable	Not applicable	Don’t know							Not hesitant	Disagree	Don’t Know	Disagree	Disagree	Don’t Know	Disagree	Agree	Strongly Disagree	Strongly Disagree	Strongly Disagree	Strongly Disagree	Strongly Disagree	Disagree				Disagree
675	21	Female	Married	Diploma	Primary	Private	Shenzhen Baosheng Maternity Hospital	Nurse	1	No	0	No	No	No	No	Yes	A little worried	A little worried	A little worried	A little worried	Yes	Yes	Yes	Yes	No							A little hesitant	Strongly Agree	Don’t Know	Strongly Agree	Strongly Agree	Yes	Agree	Agree	Agree	Strongly Disagree	Disagree	Strongly Agree	Strongly Agree	Disagree				Disagree
659	63	Female	Unmarried	Diploma	Senior	Private	Shenzhen Baosheng Maternity Hospital	Doctor	4	No		No	Yes	Yes	Yes	No	Not applicable	Not applicable	A little worried	A little worried	Yes	Yes	Yes	Yes	No							A little hesitant	Agree	Yes	Strongly Agree	Strongly Agree	Yes	Disagree	Disagree	Disagree	Strongly Disagree	Disagree	Agree	Strongly Agree	Disagree				Disagree
382	23	Female	Married	Diploma	Primary	Private	Shenzhen Baosheng Maternity Hospital	Nurse	1	No		Yes	Yes	Yes	Yes	No	Not applicable	Not applicable	Not applicable	Not worried	No	No	Yes	Yes	No							A little hesitant	Strongly Agree	Yes	Strongly Agree	Strongly Agree	Yes	Agree	Disagree	Disagree	Disagree	Disagree	Disagree	Agree	Disagree				Disagree
1400	37	Female	Unmarried	Bachelor	Primary	Governmental	Shenzhen Baoan Women's and Children's Hospital	Medical /Laboratory Technician	3	Yes		Yes	Yes	Yes	Yes	No	A little worried	A little worried	A little worried	Not worried	No	Yes	Yes	Yes	Yes	Never	Never	Never	Not worried	Not worried	Not worried	A little hesitant	Disagree	Don’t Know	Strongly Agree	Strongly Agree	Yes	Disagree	Disagree	Strongly Disagree	Disagree	Disagree	Agree	Agree	Disagree				Agree
	35	Male	Unmarried	Bachelor	Intermediate	Governmental	Shenzhen Baoan Women's and Children's Hospital	Medical /Laboratory Technician	3	Yes		Yes	Yes	Yes	Yes	No	A little worried	A little worried	A little worried	Not worried	No	Yes	Yes	Yes	Yes	Never	Never	Never	Not worried	Not worried	Not worried	A little hesitant	Disagree	Don’t Know	Strongly Agree	Strongly Agree	Yes	Disagree	Disagree	Strongly Disagree	Disagree	Disagree	Agree	Agree	Disagree				Agree
1456	42	Male	Unmarried	High school or others	None	Governmental	Shenzhen Baoan Women's and Children's Hospital	Cleaning staff	1	No		No	Yes	Yes	No	No	Very worried	Not applicable	Not applicable	Not applicable	No	No	No	Not applicable	Don’t know							Somewhat hesitant	Disagree	Don’t Know	Disagree	Agree	Don’t Know	Disagree	Strongly Disagree	Strongly Disagree	Strongly Disagree	Strongly Disagree	Disagree	Disagree	Strongly Disagree				Disagree
1437	40	Male	Unmarried	Master or higher	Intermediate	Governmental	Shenzhen Baoan Women's and Children's Hospital	Doctor	3	No		Yes	Yes	Yes	Yes	No	Not worried	Not worried	Not worried	Not worried	No	No	No	No	Yes	Never	Never	Never	Not worried	Not worried	Not worried	Not hesitant	Agree	Yes	Strongly Agree	Strongly Agree	Yes	Disagree	Disagree	Strongly Disagree	Strongly Disagree	Strongly Disagree	Disagree	Disagree	Disagree				Disagree
1439	32	Female	Married	Master or higher	Intermediate	Governmental	Shenzhen Baoan Women's and Children's Hospital	Public health care physician	1	No		Yes	Yes	Yes	Yes	No	Not worried	Not worried	A little worried	Not worried	No	No	No	No	Don’t know							Not hesitant	Agree	Yes	Strongly Agree	Strongly Agree	Yes	Disagree	Disagree	Disagree	Disagree	Disagree	Disagree	Disagree	Disagree				Disagree
1402	23	Female	Married	Diploma	Primary	Governmental	Shenzhen Baoan Women's and Children's Hospital	Nurse	1	No		No	Yes	Yes	No	No	Worried	Very worried	Very worried	Not worried	Yes	Yes	No	Yes	No							Somewhat hesitant	Agree	No	Strongly Agree	Strongly Agree	Yes	Agree	Disagree	Disagree	Agree	Disagree	Disagree	Agree	Agree	Agree	Agree	Agree	Disagree
1409	24	Female	Married	Diploma	None	Governmental	Shenzhen Baoan Women's and Children's Hospital	Nurse	1	No		Yes	Yes	Yes	Yes	Yes	Not worried	Very worried	A little worried	Not worried	No	No	No	Yes	Yes	Never	Never	Never	Not worried	Not worried	Not worried	A little hesitant	Agree	Don’t Know	Disagree	Disagree	Don’t Know	Disagree	Disagree	Disagree	Disagree	Disagree	Agree	Agree	Disagree				Disagree
1425	40	Female	Unmarried	Diploma	Primary	Governmental	Shenzhen Baoan Women's and Children's Hospital	Nurse	3	Yes	6-10	No	Yes	Yes	No	No	Not worried	Not worried	Not worried	Not worried	Not applicable	Yes	Yes	Not applicable	Yes	Never	Never	Never	Not worried	Not worried	Not worried	A little hesitant	Agree	No	Strongly Agree	Strongly Agree	No	Disagree	Disagree	Disagree	Agree	Disagree	Strongly Agree	Agree	Agree	Disagree	Agree	Agree	Strongly Agree
1448	48	Female	Unmarried	High school or others	None	Governmental	Shenzhen Baoan Women's and Children's Hospital	Other	1	No	0	No	Yes	Yes	No	No	A little worried	Not applicable	Not applicable	Not worried	Not applicable	Not applicable	Not applicable	Not applicable	Don’t know							Not hesitant	Strongly Agree	Yes	Strongly Agree	Strongly Agree	Yes	Disagree	Disagree	Disagree	Disagree	Disagree	Agree	Agree	Disagree				Disagree
1405	41	Male	Unmarried	Bachelor	Intermediate	Governmental	Shenzhen Baoan Women's and Children's Hospital	Medical /Laboratory Technician	3	No		No	Yes	Yes	Yes	No	Not worried	A little worried	A little worried	Not worried	Yes	Yes	Yes	Yes	Yes	Never	Never	Never	Not worried	Not worried	A little worried	A little hesitant	Agree	No	Strongly Agree	Strongly Agree	Yes	Agree	Disagree	Strongly Disagree	Agree	Disagree	Agree	Agree	Disagree				Disagree
1406	28	Male	Married	Bachelor	Primary	Governmental	Shenzhen Baoan Women's and Children's Hospital	Medical /Laboratory Technician	1	No		No	Yes	Yes	Yes	No	Not worried	Worried	Worried	Not worried	Yes	Yes	Yes	Yes	Yes	Once or twice	Never	Never	A little worried	Not worried	Not worried	A little hesitant	Disagree	Don’t Know	Strongly Agree	Strongly Agree	Don’t Know	Agree	Disagree	Agree	Strongly Agree	Agree	Agree	Agree	Agree	Disagree	Disagree	Agree	Disagree
1427	41	Female	Unmarried	Bachelor	Intermediate	Governmental	Shenzhen Baoan Women's and Children's Hospital	Nurse	4	No	1-5	No	Yes	No	No	No	A little worried	Very worried	Very worried	A little worried	No	Yes	Yes	Yes	Yes	Never	Never	Never	A little worried	Not worried	Not worried	Somewhat hesitant	Strongly Agree	Don’t Know	Strongly Agree	Strongly Agree	Yes	Agree	Disagree	Agree	Disagree	Disagree	Strongly Agree	Strongly Agree	Agree	Agree	Disagree	Agree	Disagree
1429	48	Female	Unmarried	Bachelor	Senior	Governmental	Shenzhen Baoan Women's and Children's Hospital	Public health care physician	4	No		Yes	Yes	Yes	Yes	No	A little worried	A little worried	A little worried	A little worried	Yes	Yes	Yes	Yes	Yes	Never	Never	Never	Not worried	Not worried	Not worried	A little hesitant	Strongly Agree	Yes	Strongly Agree	Strongly Agree	Yes	Strongly Agree	Agree	Strongly Agree	Disagree	Agree	Strongly Agree	Strongly Agree	Disagree				Agree
1430	56	Male	Unmarried	Master or higher	Senior	Governmental	Shenzhen Baoan Women's and Children's Hospital	Doctor	4	Yes	0	No	Yes	No	No	No	Not worried	A little worried	A little worried	Not worried	Yes	Yes	Yes	Yes	Don’t know							Somewhat hesitant	Agree	Don’t Know	Strongly Agree	Strongly Agree	Don’t Know	Disagree	Agree	Disagree	Disagree	Disagree	Strongly Agree	Strongly Disagree	Disagree				Strongly Disagree
1431	62	Male	Unmarried	Master or higher	Senior	Governmental	Shenzhen Baoan Women's and Children's Hospital	Obstetrician and Gynecologist	4	No		Yes	Yes	Yes	Yes	No	Worried	Not worried	Not worried	Not worried	No	Yes	No	Yes	Yes	Never	Never	Never	Not worried	Not worried	Not worried	Not hesitant	Strongly Agree	Yes	Strongly Agree	Strongly Agree	Yes	Agree	Strongly Disagree	Disagree	Disagree	Disagree	Agree	Agree	Disagree				Disagree
1436	43	Male	Unmarried	Bachelor	Intermediate	Governmental	Shenzhen Baoan Women's and Children's Hospital	Pharmacist	4	No		Yes	Yes	Yes	Yes	No	Not worried	Very worried	Very worried	Not worried	Yes	Yes	Yes	Yes	Don’t know							Somewhat hesitant	Strongly Agree	No	Strongly Agree	Strongly Agree	Yes	Strongly Disagree	Strongly Disagree	Strongly Disagree	Strongly Disagree	Agree	Agree	Strongly Agree	Strongly Disagree				Disagree
1438	44	Female	Unmarried	Bachelor	Senior	Governmental	Shenzhen Baoan Women's and Children's Hospital	Public health care physician	4	Yes	1-5	Yes	Yes	Yes	Yes	No	Not worried	Not worried	Not worried	Not worried	Yes	No	No	Yes	Yes	Never	Never	Never	Not worried	Not worried	Not worried	Not hesitant	Strongly Agree	Yes	Strongly Agree	Strongly Agree	Yes	Strongly Agree	Disagree	Disagree	Disagree	Disagree	Disagree	Agree	Disagree				Disagree
1447	50	Female	Unmarried	High school or others	None	Governmental	Shenzhen Baoan Women's and Children's Hospital	Cleaning staff	1	No	0	Yes	No	No	No	No	A little worried	Very worried	Very worried	Not worried	Not applicable	Not applicable	Yes	Yes	Don’t know							A little hesitant	Disagree	Don’t Know	Strongly Agree	Strongly Agree	Don’t Know	Strongly Disagree	Disagree	Strongly Disagree	Strongly Disagree	Disagree	Disagree	Agree	Disagree				Disagree
1397	25	Female	Married	Diploma	Primary	Governmental	Shenzhen Baoan Women's and Children's Hospital	Nurse	1	No		Yes	Yes	Yes	Yes	No	Not applicable	Not applicable	Not applicable	Not applicable	Not applicable	Not applicable	Not applicable	Not applicable	Yes	Never	Never	Never	Not worried	Not worried	Not worried	A little hesitant	Strongly Agree	Don’t Know	Strongly Agree	Strongly Agree	Don’t Know	Disagree	Agree	Disagree	Disagree	Strongly Disagree	Strongly Disagree	Strongly Agree	Disagree				Agree
1394	31	Female	Married	Bachelor	Primary	Governmental	Shenzhen Baoan Women's and Children's Hospital	Nurse	2	No		Yes	Yes	Yes	Yes	No	Not worried	Not worried	Not worried	Not worried	No	No	No	No	No							Not hesitant	Strongly Agree	No	Strongly Agree	Strongly Agree	Yes	Strongly Disagree	Strongly Disagree	Strongly Disagree	Agree	Disagree	Agree	Agree	Strongly Disagree				Strongly Disagree
1434	63	Male	Unmarried	Bachelor	Senior	Governmental	Shenzhen Baoan Women's and Children's Hospital	Doctor	4	No		Yes	Yes	Yes	No	No	Not worried	A little worried	Not applicable	Not worried	No	No	Yes	No	No							Not hesitant	Disagree	Don’t Know	Strongly Agree	Strongly Agree	Yes	Disagree	Agree	Disagree	Disagree	Strongly Disagree	Disagree	Disagree	Disagree				Disagree
1398	37	Female	Unmarried	Master or higher	Senior	Governmental	Shenzhen Baoan Women's and Children's Hospital	Doctor	3	No		Yes	Yes	Yes	Yes	No	Not worried	Not worried	Not worried	Not worried	No	No	Yes	Yes	Yes	Once or twice	Never	Never	Not worried	Not worried	Not worried	A little hesitant	Agree	No	Strongly Agree	Strongly Agree	Yes	Strongly Disagree	Disagree	Strongly Disagree	Agree	Strongly Disagree	Strongly Disagree	Strongly Agree	Disagree				Disagree
1399	26	Female	Unmarried	Diploma	Primary	Governmental	Shenzhen Baoan Women's and Children's Hospital	Nurse	2	No	1-5	Yes	Yes	No	No	No	Not worried	Very worried	Very worried	Not worried	No	Yes	Yes	Yes	Yes	Never	Never	Never	A little worried	Worried	Not worried	Somewhat hesitant	Strongly Agree	Don’t Know	Strongly Agree	Agree	No	Agree	Disagree	Strongly Disagree	Agree	Agree	Disagree	Agree	Strongly Disagree				Strongly Disagree
1414	51	Female	Unmarried	Bachelor	Intermediate	Governmental	Shenzhen Baoan Women's and Children's Hospital	Nurse	4	No	0	No	Yes	No	No	No	Worried	Not applicable	Not applicable	Worried	Yes	Yes	Yes	Yes	Don’t know							Somewhat hesitant	Strongly Agree	Don’t Know	Strongly Agree	Strongly Agree	Yes	Agree	Agree	Agree	Agree	Strongly Agree	Strongly Agree	Strongly Agree	Strongly Agree	Agree	Agree	Agree	Strongly Agree
1403	20	Female	Married	Diploma	None	Governmental	Shenzhen Baoan Women's and Children's Hospital	Receptionist	1	No		Yes	Yes	Yes	Yes	No	Worried	Worried	A little worried	A little worried	Yes	Yes	Yes	Yes	Yes	Never	Never	Never	A little worried	Not worried	Not worried	A little hesitant	Agree	No	Strongly Agree	Strongly Agree	Yes	Disagree	Agree	Agree	Agree	Strongly Disagree	Disagree	Strongly Agree	Strongly Disagree				Strongly Disagree
1415	54	Male	Unmarried	Bachelor	Senior	Governmental	Shenzhen Baoan Women's and Children's Hospital	Doctor	4	No		No	Yes	Yes	No	No	Not applicable	Not worried	A little worried	Not worried	No	No	No	No	Don’t know							A little hesitant	Strongly Agree	Yes	Strongly Agree	Strongly Agree	Don’t Know	Disagree	Disagree	Disagree	Disagree	Disagree	Disagree	Agree	Disagree				Strongly Agree
1422	41	Female	Unmarried	Bachelor	Intermediate	Governmental	Shenzhen Baoan Women's and Children's Hospital	Nurse	4	No		Yes	Yes	Yes	Yes	No	A little worried	A little worried	A little worried	Not worried	No	Yes	Yes	Yes	No							Somewhat hesitant	Strongly Agree	Yes	Strongly Agree	Strongly Agree	Yes	Disagree	Agree	Agree	Disagree	Disagree	Disagree	Disagree	Strongly Disagree				Strongly Disagree
1404	42	Female	Unmarried	Diploma	None	Governmental	Shenzhen Baoan Women's and Children's Hospital	Cashier	3	No		No	No	No	No	Yes	Not applicable	Not applicable	Not applicable	Not applicable	Not applicable	Not applicable	Not applicable	Not applicable	Don’t know							Somewhat hesitant	Strongly Agree	Don’t Know	Disagree	Disagree	Don’t Know	Agree	Disagree	Disagree	Agree	Disagree	Disagree	Disagree	Agree	Agree	Disagree	Agree	Disagree
1407	27	Female	Married	Master or higher	Primary	Governmental	Shenzhen Baoan Women's and Children's Hospital	Obstetrician and Gynecologist	1	No	1-5	No	No	No	No	Yes	A little worried	A little worried	A little worried	Not worried	No	Yes	No	Yes	Don’t know							Not hesitant	Agree	No	Disagree	Disagree	Don’t Know	Agree	Disagree	Disagree	Disagree	Disagree	Disagree	Agree	Disagree				Disagree
1411	26	Female	Married	Master or higher	Primary	Governmental	Shenzhen Baoan Women's and Children's Hospital	Dentist	1	No	0	No	No	No	No	Yes	Very worried	Worried	Not applicable	Not applicable	No	No	Yes	Yes	Yes	Most of the time	Several times	Never	Not worried	Not worried	Not worried	A little hesitant	Disagree	Don’t Know	Strongly Agree	Strongly Agree	Don’t Know	Disagree	Disagree	Disagree	Disagree	Disagree	Agree	Disagree	Disagree				Disagree
1421	22	Female	Married	Diploma	Primary	Governmental	Shenzhen Baoan Women's and Children's Hospital	Nurse	1	No	1-5	Yes	Yes	Yes	Yes	No	Not worried	A little worried	A little worried	Not worried	No	No	No	No	Yes	Once or twice	Never	Never	Not worried	Not worried	Not worried	A little hesitant	Agree	No	Strongly Agree	Strongly Agree	Don’t Know	Agree	Disagree	Disagree	Disagree	Disagree	Disagree	Agree	Disagree				Disagree
1455	30	Male	Unmarried	Bachelor	None	Governmental	Shenzhen Baoan Women's and Children's Hospital	Medical Records Personnel	2	No	0	No	No	No	No	Yes	Not applicable	Not applicable	Not applicable	Not applicable	Not applicable	Not applicable	Not applicable	Not applicable	Don’t know							Very hesitant	Disagree	Don’t Know	Disagree	Disagree	Don’t Know	Agree	Disagree	Disagree	Disagree	Disagree	Agree	Strongly Agree	Disagree				Disagree
1416	22	Female	Married	Bachelor	None	Governmental	Shenzhen Baoan Women's and Children's Hospital	Nurse	1	No	6-10	Yes	Yes	Yes	Yes	No	Very worried	Worried	Worried	Not worried	No	Yes	Yes	Yes	Don’t know							Not hesitant	Strongly Agree	Yes	Strongly Agree	Strongly Agree	Yes	Agree	Agree	Agree	Disagree	Disagree	Agree	Disagree	Disagree				Disagree
1424	25	Female	Married	Diploma	Primary	Governmental	Shenzhen Baoan Women's and Children's Hospital	Nurse	1	No	1-5	No	Yes	Yes	No	No	A little worried	Very worried	A little worried	A little worried	Yes	Yes	Yes	Yes	Yes	Never	Never	Never	Not worried	A little worried	Not worried	A little hesitant	Disagree	Yes	Disagree	Strongly Agree	Don’t Know	Agree	Disagree	Disagree	Disagree	Disagree	Strongly Agree	Strongly Agree	Disagree				Disagree
1432	22	Female	Married	Diploma	None	Governmental	Shenzhen Baoan Women's and Children's Hospital	Dentist	1	No	0	Yes	Yes	Yes	Yes	No	Not applicable	Not applicable	Not applicable	Not applicable	Not applicable	Not applicable	Not applicable	Not applicable	Don’t know							Somewhat hesitant	Disagree	Yes	Disagree	Disagree	Yes	Disagree	Disagree	Disagree	Disagree	Disagree	Disagree	Agree	Disagree				Disagree
1396	32	Female	Unmarried	Master or higher	Intermediate	Governmental	Shenzhen Baoan Women's and Children's Hospital	Doctor	2	No	1-5	Yes	Yes	Yes	Yes	No	Not worried	Not worried	Not worried	Not worried	No	No	No	No	No							Not hesitant	Strongly Agree	No	Strongly Agree	Strongly Agree	Yes	Disagree	Disagree	Disagree	Disagree	Disagree	Disagree	Disagree	Disagree				Disagree
1441	33	Female	Unmarried	Master or higher	Intermediate	Governmental	Shenzhen Baoan Women's and Children's Hospital	Anesthetist	3	Yes		Yes	Yes	Yes	Yes	No	Not worried	A little worried	A little worried	Not worried	No	No	Yes	Yes	Yes	Never	Never	Never	Not worried	Not worried	Not worried	A little hesitant	Agree	Don’t Know	Strongly Agree	Strongly Agree	Yes	Agree	Strongly Disagree	Agree	Agree	Strongly Disagree	Disagree	Disagree	Agree	Disagree	Disagree	Agree	Disagree
1386	33	Female	Unmarried	Master or higher	Intermediate	Governmental	Shenzhen Baoan Women's and Children's Hospital	Obstetrician and Gynecologist	2	No	0	Yes	Yes	Yes	Yes	No	Not worried	A little worried	A little worried	Not worried	No	Yes	No	Yes	Don’t know							A little hesitant	Agree	Yes	Strongly Agree	Strongly Agree	Yes	Disagree	Agree	Disagree	Disagree	Disagree	Agree	Disagree	Disagree				Disagree
1392	35	Female	Unmarried	Bachelor	Intermediate	Governmental	Shenzhen Baoan Women's and Children's Hospital	Midwife	3	No		Yes	Yes	Yes	Yes	No	Not worried	Worried	Worried	Not worried	No	No	No	Yes	Don’t know							Somewhat hesitant	Disagree	Don’t Know	Strongly Agree	Strongly Agree	Don’t Know	Disagree	Disagree	Disagree	Disagree	Disagree	Agree	Agree	Disagree				Disagree
1435	37	Male	Divorced	Master or higher	Intermediate	Governmental	Shenzhen Baoan Women's and Children's Hospital	Medical /Laboratory Technician	2	No		No	Yes	Yes	No	No	Not worried	A little worried	A little worried	Not worried	Not applicable	Not applicable	Not applicable	Not applicable	Don’t know							Somewhat hesitant	Strongly Agree	Don’t Know	Strongly Agree	Strongly Agree	Yes	Agree	Disagree	Disagree	Agree	Agree	Strongly Disagree	Agree	Strongly Disagree				Disagree
1395	32	Female	Unmarried	Bachelor	None	Governmental	Shenzhen Baoan Women's and Children's Hospital	Health Educator	2	No		No	Yes	No	No	No	Not applicable	Not applicable	Not applicable	Not applicable	Not applicable	Not applicable	Not applicable	Not applicable	Don’t know							Somewhat hesitant	Disagree	Don’t Know	Strongly Agree	Strongly Agree	Don’t Know	Agree	Disagree	Disagree	Disagree	Disagree	Agree	Agree	Disagree				Disagree
1433	47	Male	Unmarried	Bachelor	Senior	Governmental	Shenzhen Baoan Women's and Children's Hospital	Doctor	4	No		No	Yes	No	No	No	Not worried	A little worried	A little worried	Not worried	No	No	No	Yes	Don’t know							A little hesitant	Strongly Agree	Yes	Strongly Agree	Strongly Agree	Don’t Know	Disagree	Disagree	Agree	Disagree	Disagree	Agree	Agree	Disagree				Disagree
1408	32	Female	Married	Master or higher	Intermediate	Governmental	Shenzhen Baoan Women's and Children's Hospital	Medical /Laboratory Technician	2	No		No	Yes	Yes	No	No	Not applicable	Not applicable	Not applicable	Not applicable	Not applicable	Not applicable	Not applicable	Not applicable	Don’t know							Not hesitant	Disagree	Yes	Strongly Agree	Disagree	Yes	Disagree	Disagree	Disagree	Disagree	Disagree	Disagree	Disagree	Disagree				Disagree
1419	22	Female	Married	Diploma	Primary	Governmental	Shenzhen Baoan Women's and Children's Hospital	Nurse	1	No		Yes	Yes	No	No	No	A little worried	A little worried	A little worried	A little worried	No	Yes	Yes	Yes	No							Not hesitant	Agree	Yes	Strongly Agree	Strongly Agree	Yes	Disagree	Strongly Disagree	Disagree	Disagree	Disagree	Disagree	Agree	Disagree				Disagree
1420	25	Female	Married	Bachelor	Primary	Governmental	Shenzhen Baoan Women's and Children's Hospital	Nurse	1	No		No	Yes	Yes	No	No	A little worried	A little worried	Worried	A little worried	No	Yes	Yes	Yes	Yes	Never	Never	Never	Not worried	Not worried	Not worried	A little hesitant	Disagree	Yes	Strongly Agree	Strongly Agree	Yes	Disagree	Disagree	Disagree	Disagree	Disagree	Agree	Agree	Disagree				Disagree
1389	26	Female	Married	Bachelor	None	Governmental	Shenzhen Baoan Women's and Children's Hospital	Public health care physician	1	No	≥11	Yes	Yes	Yes	Yes	No	Not worried	Not applicable	Not applicable	Not applicable	No	No	No	No	Yes	Never	Never	Never	Not worried	Not worried	Not worried	Not hesitant	Strongly Agree	Yes	Strongly Agree	Strongly Agree	No	Strongly Disagree	Strongly Disagree	Strongly Disagree	Strongly Disagree	Strongly Disagree	Strongly Disagree	Strongly Disagree	Strongly Disagree				Strongly Disagree
1410	20	Female	Married	Diploma	Primary	Governmental	Shenzhen Baoan Women's and Children's Hospital	Receptionist	1	No	0	No	Yes	Yes	No	No	A little worried	Worried	Not applicable	Not worried	No	Yes	No	Not applicable	Don’t know							A little hesitant	Disagree	Don’t Know	Disagree	Disagree	Don’t Know	Strongly Disagree	Strongly Disagree	Disagree	Disagree	Disagree	Disagree	Strongly Disagree	Disagree				Disagree
1390	38	Female	Unmarried	Bachelor	Senior	Governmental	Shenzhen Baoan Women's and Children's Hospital	Obstetrician and Gynecologist	3	No	1-5	Yes	Yes	Yes	No	No	A little worried	A little worried	A little worried	Not worried	No	No	No	Yes	Yes	Never	Never	Never	Not worried	Not worried	Not worried	A little hesitant	Disagree	No	Strongly Agree	Strongly Agree	Yes	Agree	Disagree	Disagree	Disagree	Disagree	Agree	Strongly Agree	Disagree				Disagree
1440	44	Female	Unmarried	Master or higher	Senior	Governmental	Shenzhen Baoan Women's and Children's Hospital	Doctor	3	No	0	No	Yes	Yes	No	No	Not worried	A little worried	Not worried	Not worried	No	No	No	No	Don’t know							Somewhat hesitant	Strongly Agree	No	Strongly Agree	Strongly Agree	Yes	Disagree	Disagree	Disagree	Disagree	Disagree	Agree	Agree	Agree	Agree	Agree	Agree	Disagree
1443	36	Female	Unmarried	Master or higher	Senior	Governmental	Shenzhen Baoan Women's and Children's Hospital	Medical /Laboratory Technician	3	No		No	No	No	No	Yes	A little worried	Worried	Worried	Not worried	Not applicable	Yes	Yes	Yes	Don’t know							A little hesitant	Strongly Agree	Yes	Disagree	Disagree	Don’t Know	Agree	Agree	Disagree	Disagree	Disagree	Agree	Strongly Agree	Agree	Agree	Agree	Agree	Agree
1391	28	Female	Married	Master or higher	Primary	Governmental	Shenzhen Baoan Women's and Children's Hospital	Obstetrician and Gynecologist	1	No		Yes	Yes	Yes	Yes	No	Not worried	A little worried	A little worried	Not worried	No	Yes	Yes	Yes	No							A little hesitant	Disagree	Don’t Know	Strongly Agree	Strongly Agree	Yes	Agree	Disagree	Strongly Disagree	Disagree	Disagree	Agree	Agree	Disagree				Disagree
1417	26	Female	Unmarried	Bachelor	Primary	Governmental	Shenzhen Baoan Women's and Children's Hospital	Nurse	2	No		Yes	Yes	Yes	Yes	No	A little worried	A little worried	A little worried	A little worried	No	Yes	Yes	Yes	Don’t know							A little hesitant	Strongly Agree	Yes	Strongly Agree	Strongly Agree	Yes	Strongly Disagree	Strongly Disagree	Strongly Disagree	Strongly Disagree	Strongly Disagree	Strongly Disagree	Strongly Disagree	Strongly Disagree				Strongly Agree
1423	32	Female	Unmarried	Bachelor	Intermediate	Governmental	Shenzhen Baoan Women's and Children's Hospital	Pharmacist	2	No		No	No	No	No	Yes	Not worried	A little worried	A little worried	Not worried	Not applicable	Not applicable	Not applicable	Not applicable	Don’t know							Somewhat hesitant	Disagree	Don’t Know	Strongly Agree	Strongly Agree	Don’t Know	Agree	Disagree	Agree	Agree	Agree	Agree	Strongly Agree	Disagree				Disagree
1426	37	Female	Unmarried	Master or higher	Senior	Governmental	Shenzhen Baoan Women's and Children's Hospital	Medical /Laboratory Technician	3	No		No	No	No	No	Yes	Not applicable	Not applicable	Not applicable	Not applicable	Not applicable	Not applicable	Not applicable	Not applicable	Don’t know							A little hesitant	Strongly Agree	Yes	Disagree	Disagree	Don’t Know	Disagree	Disagree	Disagree	Agree	Disagree	Agree	Agree	Disagree				Disagree
1418	32	Female	Unmarried	Master or higher	Intermediate	Governmental	Shenzhen Baoan Women's and Children's Hospital	Doctor	2	No		No	Yes	No	No	No	Not worried	Not worried	Not worried	Not worried	No	No	Yes	Yes	Don’t know							Not hesitant	Disagree	Don’t Know	Strongly Agree	Strongly Agree	Don’t Know	Strongly Disagree	Disagree	Strongly Disagree	Strongly Disagree	Strongly Disagree	Disagree	Agree	Disagree				Strongly Disagree
1413	23	Female	Married	Bachelor	None	Governmental	Shenzhen Baoan Women's and Children's Hospital	Medical Records Personnel	1	No		No	No	No	No	Yes	Not worried	Worried	Worried	A little worried	No	No	Yes	Not applicable	Don’t know							Not hesitant	Disagree	Don’t Know	Disagree	Disagree	Don’t Know	Disagree	Strongly Disagree	Strongly Disagree	Strongly Disagree	Strongly Disagree	Agree	Strongly Agree	Disagree				Strongly Disagree
1412	22	Female	Married	Diploma	Primary	Governmental	Shenzhen Baoan Women's and Children's Hospital	Receptionist	1	No	1-5	No	Yes	No	No	Yes	Not worried	Worried	Worried	Not worried	No	No	No	No	Yes	Never	Never	Never	A little worried	A little worried	A little worried	A little hesitant	Agree	Yes	Strongly Agree	Strongly Agree	Yes	Strongly Disagree	Strongly Disagree	Disagree	Disagree	Strongly Disagree	Disagree	Disagree	Disagree				Disagree
1393	38	Female	Unmarried	Master or higher	Senior	Governmental	Shenzhen Baoan Women's and Children's Hospital	Obstetrician and Gynecologist	3	No	0	Yes	Yes	Yes	Yes	No	Not worried	Not worried	A little worried	Not worried	Yes	Yes	Yes	Yes	Don’t know							A little hesitant	Strongly Agree	Yes	Strongly Agree	Strongly Agree	Yes	Strongly Agree	Strongly Disagree	Disagree	Strongly Disagree	Strongly Disagree	Agree	Agree	Agree	Disagree	Agree	Disagree	Agree
1428	50	Male	Unmarried	Bachelor	Senior	Governmental	Shenzhen Baoan Women's and Children's Hospital	Doctor	3	No		Yes	Yes	Yes	Yes	Yes	A little worried	Very worried	Worried	Not worried	Not applicable	Not applicable	Not applicable	Not applicable	Don’t know							Somewhat hesitant	Disagree	Don’t Know	Disagree	Disagree	Don’t Know	Disagree	Agree	Strongly Disagree	Strongly Disagree	Strongly Disagree	Strongly Disagree	Strongly Disagree	Disagree				Disagree
1388	25	Female	Married	Diploma	Primary	Governmental	Shenzhen Baoan Women's and Children's Hospital	Receptionist	1	No		No	Yes	Yes	Yes	No	Not worried	Not applicable	Not applicable	Not worried	No	Yes	Yes	No	Don’t know							A little hesitant	Disagree	Don’t Know	Strongly Agree	Strongly Agree	Don’t Know	Disagree	Disagree	Disagree	Disagree	Disagree	Agree	Disagree	Disagree				Agree
1454	49	Female	Unmarried	High school or others	None	Governmental	Shenzhen Baoan Women's and Children's Hospital	Cleaning staff	2	No	≥11	Yes	No	Yes	Yes	Yes	A little worried	Not worried	Not worried	Not worried	Yes	Yes	Yes	Yes	Yes	Never	Never	Never	Not worried	Not worried	Not worried	Not hesitant	Strongly Agree	No	Strongly Agree	Strongly Agree	No	Strongly Agree	Disagree	Strongly Disagree	Disagree	Disagree	Disagree	Strongly Agree	Disagree				Agree
1442	49	Female	Unmarried	Bachelor	Senior	Governmental	Shenzhen Baoan Women's and Children's Hospital	Medical /Laboratory Technician	4	No	0	No	No	No	No	Yes	A little worried	Worried	Worried	A little worried	Not applicable	Not applicable	Not applicable	Not applicable	Don’t know							Somewhat hesitant	Disagree	Yes	Disagree	Disagree	Yes	Disagree	Disagree	Disagree	Strongly Disagree	Disagree	Agree	Agree	Disagree				Disagree
1449	49	Female	Remarried	High school or others	None	Governmental	Shenzhen Baoan Women's and Children's Hospital	Cleaning staff	1	No		No	Yes	No	No	No	Not applicable	Not applicable	Not applicable	Not applicable	No	Yes	Not applicable	Not applicable	Don’t know							Not hesitant	Disagree	No	Strongly Agree	Disagree	Don’t Know	Disagree	Disagree	Disagree	Disagree	Disagree	Disagree	Agree	Disagree				Disagree
1453	46	Female	Unmarried	High school or others	None	Governmental	Shenzhen Baoan Women's and Children's Hospital	Nursing worker	1	No		No	Yes	No	No	No	Not applicable	A little worried	Not applicable	Not applicable	Not applicable	Yes	Yes	Yes	Yes	Never	Never	Never	Not worried	Not worried	Not worried	Somewhat hesitant	Agree	Don’t Know	Strongly Agree	Strongly Agree	Don’t Know	Disagree	Disagree	Strongly Disagree	Disagree	Disagree	Agree	Agree	Strongly Disagree				Disagree
1444	45	Female	Unmarried	Bachelor	Senior	Governmental	Shenzhen Baoan Women's and Children's Hospital	Doctor	3	No		Yes	Yes	Yes	No	No	A little worried	Not worried	A little worried	Not worried	Yes	Yes	Yes	Yes	Don’t know							A little hesitant	Strongly Agree	Yes	Strongly Agree	Strongly Agree	Yes	Disagree	Disagree	Disagree	Disagree	Disagree	Disagree	Agree	Disagree				Disagree
1445	56	Male	Unmarried	High school or others	None	Governmental	Shenzhen Baoan Women's and Children's Hospital	Cleaning staff	1	No		No	No	No	No	Yes	A little worried	Not applicable	Not applicable	Not worried	Not applicable	Not applicable	Yes	Not applicable	Don’t know							Very hesitant	Disagree	Yes	Disagree	Strongly Agree	Don’t Know	Strongly Agree	Disagree	Disagree	Strongly Disagree	Agree	Strongly Agree	Agree	Disagree				Disagree
1446	46	Male	Unmarried	High school or others	None	Governmental	Shenzhen Baoan Women's and Children's Hospital	Cleaning staff	1	No		No	No	No	No	Yes	A little worried	Not applicable	Not applicable	Not worried	Not applicable	Yes	Yes	Not applicable	Don’t know							Very hesitant	Disagree	Yes	Disagree	Strongly Agree	Don’t Know	Strongly Agree	Disagree	Disagree	Strongly Disagree	Agree	Strongly Agree	Agree	Disagree				Disagree
623	22	Female	Married	Diploma	Primary	Private	Shenzhen Tongren Maternity Hospital	Nurse	1	No	1-5	No	No	No	No	Yes	A little worried	Very worried	A little worried	Not worried	No	Yes	Yes	Yes	No							A little hesitant	Strongly Agree	Yes	Strongly Agree	Strongly Agree	No	Agree	Disagree	Agree	Disagree	Disagree	Agree	Agree	Agree	Disagree	Disagree	Agree	Disagree
221	27	Female	Married	Diploma	Primary	Private	Shenzhen Tongren Maternity Hospital	Pharmacist	1	Yes	0	No	Yes	No	No	No	A little worried	A little worried	Worried	Not worried	Yes	No	Yes	Yes	Yes	Never	Never	Never	Not worried	Not worried	Not worried	Somewhat hesitant	Disagree	Don’t Know	Strongly Agree	Strongly Agree	Yes	Strongly Agree	Disagree	Agree	Agree	Disagree	Strongly Agree	Strongly Agree	Disagree				Agree
452	36	Female	Married	Bachelor	Primary	Private	Shenzhen Tongren Maternity Hospital	Obstetrician and Gynecologist	3	Yes		Yes	Yes	Yes	Yes	No	Very worried	Very worried	Very worried	Very worried	No	Yes	No	Yes	Don’t know							A little hesitant	Agree	Yes	Disagree	Disagree	Yes	Strongly Agree	Strongly Agree	Strongly Agree	Strongly Agree	Agree	Agree	Strongly Agree	Disagree				Disagree
239	65	Female	Unmarried	Bachelor	Senior	Private	Shenzhen Tongren Maternity Hospital	Obstetrician and Gynecologist	3	Yes	1-5	No	Yes	Yes	No	No	Not worried	A little worried	A little worried	Not worried	No	Yes	Yes	Yes	No							Not hesitant	Agree	Yes	Strongly Agree	Strongly Agree	Yes	Strongly Disagree	Disagree	Strongly Disagree	Agree	Agree	Agree	Agree	Disagree				Agree
240	23	Female	Married	High school or others	None	Private	Shenzhen Tongren Maternity Hospital	Nurse	1	No	0	Yes	Yes	Yes	Yes	No	Not worried	Not worried	Not worried	Not worried	No	No	No	No	Yes	Never	Never	Never	Not worried	Not worried	Not worried	A little hesitant	Agree	No	Strongly Agree	Strongly Agree	Yes	Agree	Disagree	Agree	Agree	Disagree	Agree	Agree	Disagree				Disagree
1371	24	Female	Married	Diploma	None	Private	Shenzhen Tongren Maternity Hospital	Medical /Laboratory Technician	1	No		No	Yes	No	No	No	Not worried	A little worried	Not worried	Not worried	Yes	Yes	Yes	Yes	Don’t know							A little hesitant	Agree	No	Strongly Agree	Strongly Agree	Yes	Disagree	Strongly Disagree	Disagree	Disagree	Disagree	Disagree	Agree	Strongly Disagree				Strongly Disagree
383	58	Female	Unmarried	Bachelor	Senior	Private	Shenzhen Tongren Maternity Hospital	Obstetrician and Gynecologist	4	Yes		Yes	Yes	Yes	Yes	No	Not worried	A little worried	A little worried	Not worried	No	Yes	Yes	Yes	No							Not hesitant	Agree	No	Strongly Agree	Strongly Agree	Yes	Disagree	Disagree	Agree	Agree	Agree	Agree	Agree	Disagree				Disagree
753	33	Female	Unmarried	Bachelor	Intermediate	Private	Shenzhen Tongren Maternity Hospital	Midwife	2	No		Yes	Yes	Yes	No	No	Not worried	Worried	Worried	Not worried	No	Yes	Yes	Yes	No							A little hesitant	Agree	No	Agree	Agree	Yes	Disagree	Disagree	Disagree	Disagree	Agree	Agree	Agree	Disagree				Disagree
1323	38	Female	Unmarried	Diploma	Intermediate	Private	Shenzhen Tongren Maternity Hospital	Nurse	3	No	1-5	Yes	Yes	Yes	Yes	No	Not worried	A little worried	A little worried	Not worried	No	No	No	No	No							Not hesitant	Strongly Agree	Yes	Strongly Agree	Strongly Agree	Yes	Agree	Agree	Agree	Disagree	Disagree	Agree	Agree	Disagree				Disagree
740	29	Female	Unmarried	High school or others	Intermediate	Private	Shenzhen Tongren Maternity Hospital	Nurse	2	No		Yes	Yes	Yes	Yes	Yes	A little worried	Very worried	Very worried	Not worried	No	No	No	Yes	Don’t know							Somewhat hesitant	Strongly Agree	No	Disagree	Strongly Agree	Yes	Agree	Disagree	Agree	Agree	Strongly Agree	Agree	Strongly Agree	Disagree				Strongly Disagree
1269	72	Male	Unmarried	High school or others	Intermediate	Private	Shenzhen Tongren Maternity Hospital	Medical /Laboratory Technician	4	No		Yes	Yes	Yes	Yes	Yes	Not worried	Not worried	Not worried	Not worried	No	Yes	Yes	Yes	No							A little hesitant	Strongly Agree	Yes	Strongly Agree	Strongly Agree	Yes	Agree	Disagree	Strongly Disagree	Disagree	Strongly Disagree	Agree	Agree	Disagree				Disagree
748	32	Female	Married	Bachelor	Primary	Private	Shenzhen Tongren Maternity Hospital	Nurse	2	Yes	0	Yes	Yes	Yes	Yes	No	Not worried	Not worried	Not worried	Not worried	No	No	Yes	No	Yes	Never	Never	Never	Not worried	Not worried	Not worried	Not hesitant	Agree	Yes	Strongly Agree	Strongly Agree	Yes	Agree	Disagree	Disagree	Disagree	Disagree	Agree	Agree	Disagree				Disagree
1340	20	Female	Married	High school or others	None	Private	Shenzhen Tongren Maternity Hospital	Receptionist	1	No		No	Yes	Yes	No	No	Not applicable	Not applicable	Not applicable	Not applicable	Not applicable	Not applicable	Not applicable	Not applicable	No							Not hesitant	Agree	No	Strongly Agree	Strongly Agree	Yes	Disagree	Disagree	Strongly Disagree	Agree	Disagree	Agree	Agree	Disagree				Disagree
423	50	Female	Unmarried	Diploma	Intermediate	Private	Shenzhen Tongren Maternity Hospital	Nurse	4	No	1-5	Yes	Yes	Yes	Yes	No	Not worried	A little worried	Not worried	Not worried	No	Yes	Yes	Yes	No							Not hesitant	Strongly Agree	Yes	Strongly Agree	Strongly Agree	Yes	Strongly Disagree	Strongly Disagree	Strongly Disagree	Disagree	Strongly Disagree	Strongly Disagree	Agree	Strongly Disagree				Strongly Disagree
755	25	Female	Married	Diploma	Primary	Private	Shenzhen Tongren Maternity Hospital	Medical /Laboratory Technician	1	No	0	Yes	Yes	Yes	Yes	No	Not worried	A little worried	A little worried	Not worried	No	No	No	Yes	No							A little hesitant	Agree	Yes	Strongly Agree	Strongly Agree	Yes	Strongly Disagree	Strongly Disagree	Strongly Disagree	Strongly Disagree	Strongly Disagree	Agree	Strongly Agree	Disagree				Strongly Disagree
1287	48	Male	Unmarried	Bachelor	Intermediate	Private	Shenzhen Tongren Maternity Hospital	Anesthetist	4	No		No	Yes	Yes	No	No	A little worried	A little worried	A little worried	Not worried	No	Yes	Yes	Yes	No							A little hesitant	Agree	Yes	Strongly Agree	Strongly Agree	Yes	Disagree	Disagree	Disagree	Disagree	Disagree	Disagree	Agree	Disagree				Disagree
226	24	Female	Married	Diploma	Primary	Private	Shenzhen Tongren Maternity Hospital	Nurse	1	No		No	Yes	Yes	No	No	Not applicable	Not applicable	Worried	Worried	Not applicable	Yes	Yes	Yes	Don’t know							A little hesitant	Disagree	Don’t Know	Strongly Agree	Strongly Agree	Yes	Agree	Disagree	Strongly Disagree	Disagree	Disagree	Agree	Agree	Agree	Agree	Agree	Disagree	Disagree
357	32	Female	Unmarried	High school or others	None	Private	Shenzhen Tongren Maternity Hospital	Receptionist	2	Yes		No	Yes	Yes	No	No	Not worried	A little worried	A little worried	Not worried	No	Yes	Yes	Yes	No							Not hesitant	Agree	No	Strongly Agree	Strongly Agree	Yes	Disagree	Strongly Disagree	Strongly Disagree	Strongly Disagree	Strongly Disagree	Disagree	Agree	Strongly Disagree				Strongly Disagree
1324	28	Female	Married	Diploma	Primary	Private	Shenzhen Tongren Maternity Hospital	Nurse	1	No		No	Yes	Yes	No	No	Not worried	Not worried	Worried	Not worried	No	No	No	No	No							Not hesitant	Strongly Agree	Yes	Strongly Agree	Strongly Agree	Yes	Disagree	Disagree	Disagree	Disagree	Disagree	Agree	Agree	Disagree				Disagree
1271	32	Female	Remarried	Bachelor	Intermediate	Private	Shenzhen Tongren Maternity Hospital	Obstetrician and Gynecologist	2	Yes	≥11	Yes	Yes	Yes	Yes	No	A little worried	A little worried	Not worried	Not worried	No	No	Yes	No	Yes	Once or twice	Once or twice	Once or twice	A little worried	A little worried	Worried	A little hesitant	Agree	No	Strongly Agree	Strongly Agree	Yes	Strongly Disagree	Strongly Disagree	Disagree	Strongly Disagree	Disagree	Disagree	Disagree	Disagree				Disagree
447	35	Female	Unmarried	Diploma	Intermediate	Private	Shenzhen Tongren Maternity Hospital	Obstetrician and Gynecologist	2	No	0	Yes	Yes	Yes	Yes	No	Not worried	Not worried	Not worried	Not worried	No	Yes	No	Yes	No							Somewhat hesitant	Agree	Yes	Strongly Agree	Strongly Agree	Yes	Disagree	Disagree	Disagree	Disagree	Disagree	Agree	Agree	Strongly Disagree				Strongly Disagree
1224	30	Female	Unmarried	Bachelor	Intermediate	Private	Shenzhen Tongren Maternity Hospital	Medical /Laboratory Technician	4	No		Yes	Yes	Yes	Yes	No	Not worried	Not worried	Not worried	Not worried	No	No	No	Yes	No							Not hesitant	Agree	No	Strongly Agree	Strongly Agree	Yes	Disagree	Strongly Disagree	Strongly Disagree	Strongly Disagree	Strongly Disagree	Agree	Agree	Strongly Disagree				Strongly Disagree
586	34	Female	Unmarried	Bachelor	Intermediate	Private	Shenzhen Tongren Maternity Hospital	Pharmacist	1	No		No	Yes	Yes	No	No	Not worried	A little worried	A little worried	Not worried	No	Yes	Yes	No	Yes	Never	Never	Never	Not worried	Not worried	Not worried	Not hesitant	Agree	Yes	Strongly Agree	Strongly Agree	Yes	Disagree	Disagree	Disagree	Agree	Disagree	Agree	Agree	Disagree				Disagree
420	27	Female	Unmarried	Diploma	Intermediate	Private	Shenzhen Tongren Maternity Hospital	Nurse	1	No		Yes	Yes	Yes	Yes	No	Not worried	A little worried	A little worried	Not worried	No	Yes	Yes	Yes	Don’t know							Not hesitant	Strongly Agree	Yes	Strongly Agree	Strongly Agree	Yes	Strongly Disagree	Strongly Disagree	Agree	Disagree	Disagree	Agree	Strongly Agree	Strongly Disagree				Disagree
402	24	Female	Married	High school or others	None	Private	Shenzhen Tongren Maternity Hospital	Medical /Laboratory Technician	1	No		Yes	Yes	Yes	Yes	No	Not worried	A little worried	Not worried	Not worried	No	Yes	Yes	Yes	No							Not hesitant	Strongly Agree	Yes	Strongly Agree	Strongly Agree	Yes	Strongly Disagree	Strongly Disagree	Strongly Disagree	Strongly Disagree	Strongly Disagree	Agree	Agree	Strongly Disagree				Strongly Disagree
1314	30	Female	Unmarried	Bachelor	None	Private	Shenzhen Tongren Maternity Hospital	Obstetrician and Gynecologist	1	No		Yes	Yes	Yes	Yes	No	A little worried	A little worried	Worried	Not worried	No	Not applicable	Yes	No	Don’t know							Not hesitant	Disagree	Don’t Know	Disagree	Disagree	Don’t Know	Disagree	Disagree	Disagree	Disagree	Disagree	Disagree	Disagree	Disagree				Disagree
687	22	Female	Married	Diploma	Primary	Private	Shenzhen Tongren Maternity Hospital	Nurse	1	Yes	6-10	Yes	Yes	Yes	Yes	No	Not worried	A little worried	Not worried	Not worried	No	Yes	Yes	Yes	No							Not hesitant	Agree	No	Strongly Agree	Strongly Agree	Yes	Disagree	Disagree	Disagree	Disagree	Disagree	Agree	Agree	Strongly Disagree				Strongly Disagree
385	35	Female	Unmarried	Diploma	Primary	Private	Shenzhen Tongren Maternity Hospital	Medical /Laboratory Technician	3	No	1-5	Yes	Yes	Yes	Yes	No	Not worried	A little worried	Not worried	Not worried	No	Yes	Yes	Yes	No							Not hesitant	Strongly Agree	Yes	Strongly Agree	Strongly Agree	Yes	Strongly Disagree	Strongly Disagree	Strongly Disagree	Strongly Disagree	Strongly Disagree	Agree	Strongly Agree	Strongly Disagree				Strongly Disagree
1282	21	Female	Married	Diploma	Primary	Private	Shenzhen Tongren Maternity Hospital	Nurse	1	Yes	0	Yes	Yes	Yes	Yes	No	Not worried	Not worried	Not worried	Not worried	No	Yes	Yes	No	No							Not hesitant	Strongly Agree	Yes	Strongly Agree	Strongly Agree	No	Disagree	Disagree	Disagree	Agree	Disagree	Disagree	Agree	Disagree				Disagree
961	29	Female	Unmarried	Diploma	Primary	Private	Shenzhen Tongren Maternity Hospital	Receptionist	2	No		No	Yes	Yes	No	No	Not worried	A little worried	Not worried	Not worried	No	Yes	Yes	Yes	No							Not hesitant	Agree	No	Agree	Strongly Agree	Yes	Disagree	Disagree	Disagree	Agree	Agree	Agree	Agree	Disagree				Disagree
1326	23	Female	Married	Diploma	Primary	Private	Shenzhen Tongren Maternity Hospital	Nurse	1	No		No	Yes	Yes	No	No	Not worried	A little worried	A little worried	Not worried	No	Yes	Yes	Yes	No							Not hesitant	Agree	No	Agree	Strongly Agree	Yes	Disagree	Disagree	Disagree	Disagree	Disagree	Agree	Agree	Disagree				Disagree
1253	57	Male	Unmarried	High school or others	None	Private	Shenzhen Tongren Maternity Hospital	Cleaning staff	1	No		Yes	Yes	Yes	Yes	No	Not worried	Not applicable	Not applicable	Not applicable	No	No	No	Yes	Don’t know							Not hesitant	Agree	No	Strongly Agree	Strongly Agree	Yes	Disagree	Disagree	Disagree	Disagree	Disagree	Agree	Agree	Strongly Disagree				Strongly Disagree
750	38	Female	Unmarried	Bachelor	Intermediate	Private	Shenzhen Tongren Maternity Hospital	Nurse	2	No		No	Yes	Yes	No	No	Not worried	A little worried	A little worried	Not worried	No	Yes	Yes	Yes	No							Not hesitant	Agree	No	Agree	Strongly Agree	Yes	Disagree	Disagree	Disagree	Disagree	Disagree	Agree	Agree	Agree	Agree	Agree	Disagree	Disagree
222	38	Male	Unmarried	Bachelor	Intermediate	Private	Shenzhen Tongren Maternity Hospital	Anesthetist	2	Yes		Yes	Yes	Yes	Yes	No	A little worried	A little worried	A little worried	A little worried	No	Yes	Yes	Yes	Don’t know							A little hesitant	Strongly Agree	Yes	Strongly Agree	Strongly Agree	Yes	Disagree	Disagree	Disagree	Agree	Disagree	Agree	Agree	Disagree				Disagree
460	35	Male	Unmarried	Bachelor	Intermediate	Private	Shenzhen Tongren Maternity Hospital	Medical /Laboratory Technician	3	No	1-5	Yes	Yes	Yes	Yes	No	Not worried	Not worried	Not worried	Not worried	No	Yes	No	Yes	No							Not hesitant	Agree	Yes	Strongly Agree	Strongly Agree	Yes	Strongly Disagree	Strongly Disagree	Strongly Disagree	Strongly Disagree	Strongly Disagree	Agree	Agree	Strongly Disagree				Strongly Disagree
443	37	Female	Unmarried	Bachelor	Intermediate	Private	Shenzhen Tongren Maternity Hospital	Obstetrician and Gynecologist	3	No		Yes	Yes	Yes	Yes	No	Not worried	Not worried	Not worried	Not worried	No	Yes	Yes	Yes	No							A little hesitant	Agree	Yes	Strongly Agree	Strongly Agree	Yes	Strongly Disagree	Strongly Disagree	Strongly Disagree	Strongly Disagree	Strongly Disagree	Agree	Agree	Strongly Disagree				Strongly Disagree
1275	59	Female	Unmarried	Bachelor	Senior	Private	Shenzhen Tongren Maternity Hospital	Obstetrician and Gynecologist	4	Yes	0	Yes	Yes	Yes	Yes	Yes	Not worried	A little worried	A little worried	Not worried	No	Yes	Yes	Yes	No							Not hesitant	Agree	No	Strongly Agree	Strongly Agree	Yes	Disagree	Disagree	Disagree	Agree	Agree	Agree	Agree	Disagree				Disagree
1342	60	Female	Unmarried	Bachelor	Senior	Private	Shenzhen Tongren Maternity Hospital	Obstetrician and Gynecologist	4	No		No	Yes	Yes	No	No	Not worried	A little worried	A little worried	Not worried	No	Yes	Yes	No	No							Not hesitant	Agree	No	Strongly Agree	Strongly Agree	Yes	Disagree	Disagree	Strongly Disagree	Disagree	Disagree	Agree	Agree	Disagree				Disagree
629	26	Female	Unmarried	Bachelor	None	Private	Shenzhen Tongren Maternity Hospital	Obstetrician and Gynecologist	1	No		No	Yes	Yes	No	No	Not worried	A little worried	A little worried	A little worried	No	Yes	Yes	Yes	Don’t know							Not hesitant	Agree	No	Strongly Agree	Strongly Agree	Yes	Disagree	Disagree	Disagree	Agree	Agree	Agree	Agree	Disagree				Disagree
1331	30	Female	Married	Diploma	Primary	Private	Shenzhen Tongren Maternity Hospital	Nurse	1	No		No	Yes	Yes	No	No	Not worried	A little worried	A little worried	Not worried	No	Yes	Yes	Yes	No							Not hesitant	Agree	No	Agree	Strongly Agree	Yes	Disagree	Disagree	Disagree	Disagree	Disagree	Agree	Agree	Disagree				Disagree
1259	27	Female	Unmarried	Diploma	Primary	Private	Shenzhen Tongren Maternity Hospital	Nurse	2	No	6-10	Yes	Yes	Yes	Yes	No	Not worried	Not applicable	Not applicable	Not worried	No	Yes	Yes	Yes	Yes	Never	Never	Never	Not worried	Not worried	Not worried	Not hesitant	Strongly Agree	Yes	Strongly Agree	Strongly Agree	Yes	Disagree	Disagree	Disagree	Agree	Disagree	Agree	Agree	Disagree				Disagree
1334	45	Female	Unmarried	Bachelor	Intermediate	Private	Shenzhen Tongren Maternity Hospital	Obstetrician and Gynecologist	2	No	0	No	Yes	Yes	No	No	Not worried	Not worried	A little worried	Not worried	No	Yes	Yes	Yes	No							Not hesitant	Agree	No	Agree	Agree	Yes	Disagree	Disagree	Disagree	Disagree	Disagree	Agree	Agree	Disagree				Disagree
1240	48	Female	Unmarried	High school or others	None	Private	Shenzhen Tongren Maternity Hospital	Cleaning staff	1	No		No	Yes	Yes	No	No	Not worried	A little worried	A little worried	Not worried	Yes	Yes	Yes	Yes	No							Not hesitant	Agree	No	Strongly Agree	Strongly Agree	Yes	Disagree	Disagree	Disagree	Disagree	Disagree	Agree	Agree	Disagree				Disagree
631	38	Male	Unmarried	High school or others	None	Private	Shenzhen Tongren Maternity Hospital	Cleaning staff	1	No		No	Yes	No	No	No	Not worried	A little worried	A little worried	Not worried	Yes	Yes	Yes	Yes	No							Not hesitant	Agree	No	Strongly Agree	Strongly Agree	Yes	Disagree	Disagree	Disagree	Agree	Disagree	Agree	Agree	Disagree				Disagree
225	30	Male	Unmarried	Diploma	None	Private	Shenzhen Tongren Maternity Hospital	Pharmacist	2	No		Yes	Yes	Yes	No	No	A little worried	A little worried	A little worried	A little worried	Not applicable	No	Yes	Yes	Yes	Never	Never	Never	A little worried	A little worried	Not worried	A little hesitant	Disagree	Don’t Know	Strongly Agree	Strongly Agree	Yes	Strongly Agree	Disagree	Strongly Disagree	Strongly Agree	Strongly Agree	Agree	Disagree	Agree	Disagree	Agree	Agree	Agree
1328	27	Female	Married	Diploma	Primary	Private	Shenzhen Tongren Maternity Hospital	Nurse	1	No		No	Yes	Yes	No	No	Not worried	Not worried	A little worried	Not worried	No	Yes	Yes	No	No							Not hesitant	Agree	No	Agree	Strongly Agree	Yes	Disagree	Disagree	Disagree	Disagree	Disagree	Agree	Agree	Disagree				Disagree
769	25	Female	Unmarried	Diploma	Primary	Private	Shenzhen Tongren Maternity Hospital	Medical /Laboratory Technician	2	Yes	1-5	No	Yes	Yes	No	No	A little worried	Very worried	Worried	Not worried	No	Yes	Yes	Yes	Yes	Never	Never	Never	Not worried	Not worried	Not worried	Not hesitant	Strongly Agree	Don’t Know	Strongly Agree	Strongly Agree	Yes	Disagree	Strongly Disagree	Strongly Disagree	Strongly Disagree	Strongly Disagree	Disagree	Agree	Disagree				Disagree
1263	38	Female	Married	Master or higher	Intermediate	Private	Shenzhen Tongren Maternity Hospital	Obstetrician and Gynecologist	2	No	≥11	Yes	Yes	Yes	Yes	No	Not worried	A little worried	A little worried	Not worried	No	Yes	Yes	Yes	Yes	Never	Never	Never	A little worried	A little worried	A little worried	Not hesitant	Strongly Agree	Don’t Know	Strongly Agree	Strongly Agree	Yes	Disagree	Agree	Strongly Disagree	Strongly Disagree	Strongly Disagree	Strongly Disagree	Agree	Disagree				Disagree
752	25	Female	Unmarried	Bachelor	Primary	Private	Shenzhen Tongren Maternity Hospital	Nurse	2	No	1-5	No	Yes	Yes	No	No	Very worried	Very worried	Very worried	Not worried	Yes	Yes	Yes	Yes	Yes	Never	Never	Never	Not worried	Not worried	Not worried	Somewhat hesitant	Strongly Agree	Yes	Strongly Agree	Strongly Agree	Yes	Disagree	Disagree	Disagree	Agree	Agree	Agree	Agree	Disagree				Disagree
721	33	Female	Unmarried	Bachelor	Intermediate	Governmental	Baoan Hospital of Traditional Chinese Medicine	Nurse	3	No	0	Yes	Yes	Yes	Yes	No	Not worried	A little worried	A little worried	Not worried	No	Yes	No	Yes	Don’t know							Not hesitant	Agree	No	Strongly Agree	Strongly Agree	Yes	Agree	Disagree	Disagree	Disagree	Disagree	Disagree	Agree	Disagree				Disagree
720	37	Female	Married	Diploma	Primary	Governmental	Baoan Hospital of Traditional Chinese Medicine	Pharmacist	3	No		Yes	Yes	Yes	No	No	Not worried	Not applicable	Not applicable	Not applicable	Not applicable	Not applicable	Not applicable	Not applicable	Don’t know							A little hesitant	Agree	Don’t Know	Strongly Agree	Strongly Agree	Yes	Agree	Disagree	Agree	Disagree	Disagree	Disagree	Disagree	Disagree				Disagree
718	31	Female	Unmarried	Bachelor	Intermediate	Governmental	Baoan Hospital of Traditional Chinese Medicine	Nurse	3	No		Yes	Yes	Yes	Yes	No	Not worried	A little worried	A little worried	Not worried	No	Yes	No	Yes	Don’t know							Not hesitant	Agree	No	Strongly Agree	Strongly Agree	Yes	Agree	Disagree	Disagree	Disagree	Strongly Disagree	Disagree	Agree	Disagree				Disagree
716	30	Male	Married	Master or higher	Intermediate	Governmental	Baoan Hospital of Traditional Chinese Medicine	Doctor	1	No		Yes	Yes	Yes	Yes	No	Not worried	A little worried	A little worried	Not worried	No	Yes	No	Yes	Yes	Never	Never	Never	A little worried	A little worried	Not worried	Not hesitant	Disagree	Yes	Strongly Agree	Strongly Agree	Yes	Disagree	Disagree	Disagree	Disagree	Disagree	Disagree	Strongly Agree	Disagree				Disagree
714	28	Female	Unmarried	Bachelor	None	Governmental	Baoan Hospital of Traditional Chinese Medicine	Nurse	2	No		Yes	Yes	Yes	Yes	No	Not worried	A little worried	A little worried	Not worried	No	No	Yes	Yes	Yes	Never	Never	Never	A little worried	A little worried	A little worried	Not hesitant	Agree	No	Strongly Agree	Strongly Agree	Yes	Agree	Agree	Disagree	Disagree	Disagree	Disagree	Agree	Agree	Agree	Disagree	Agree	Disagree
715	24	Female	Married	Diploma	None	Governmental	Baoan Hospital of Traditional Chinese Medicine	Nurse	1	No		Yes	Yes	Yes	Yes	No	Not worried	A little worried	A little worried	Not worried	No	No	Yes	Yes	Yes	Never	Never	Never	A little worried	A little worried	A little worried	Not hesitant	Disagree	Yes	Strongly Agree	Strongly Agree	Yes	Disagree	Disagree	Disagree	Disagree	Disagree	Disagree	Strongly Agree	Agree	Disagree	Agree	Agree	Disagree
717	31	Male	Unmarried	Master or higher	Intermediate	Governmental	Baoan Hospital of Traditional Chinese Medicine	Doctor	2	No	1-5	Yes	Yes	Yes	Yes	No	Not worried	A little worried	A little worried	Not worried	No	No	Yes	Yes	Yes	Never	Never	Never	Not worried	Not worried	Not worried	A little hesitant	Disagree	Yes	Strongly Agree	Strongly Agree	Yes	Agree	Disagree	Disagree	Disagree	Disagree	Agree	Strongly Agree	Agree	Agree	Disagree	Agree	Disagree
713	20	Female	Married	Diploma	None	Governmental	Baoan Hospital of Traditional Chinese Medicine	Nurse	1	No		Yes	Yes	Yes	No	No	Not worried	Very worried	Very worried	Not worried	No	No	Yes	No	Yes	Never	Never	Never	Not worried	Not worried	Not worried	A little hesitant	Agree	No	Strongly Agree	Strongly Agree	Yes	Disagree	Disagree	Disagree	Disagree	Disagree	Disagree	Strongly Agree	Disagree				Disagree
711	24	Female	Married	Diploma	Primary	Governmental	Baoan Hospital of Traditional Chinese Medicine	Nurse	1	No	0	Yes	Yes	Yes	No	No	A little worried	Very worried	Very worried	Not worried	No	No	No	No	Yes	Never	Never	Never	Not worried	Not worried	Not worried	A little hesitant	Agree	No	Strongly Agree	Strongly Agree	Don’t Know	Disagree	Disagree	Disagree	Disagree	Disagree	Agree	Strongly Agree	Disagree				Disagree
710	38	Female	Unmarried	Bachelor	Intermediate	Governmental	Baoan Hospital of Traditional Chinese Medicine	Midwife	3	No		Yes	Yes	Yes	Yes	No	Not worried	Not worried	A little worried	Not worried	No	No	No	No	Don’t know							Not hesitant	Strongly Agree	Yes	Strongly Agree	Strongly Agree	Yes	Disagree	Strongly Disagree	Strongly Disagree	Strongly Disagree	Strongly Disagree	Strongly Disagree	Strongly Disagree	Strongly Disagree				Strongly Disagree
1129	34	Male	Unmarried	Bachelor	Intermediate	Governmental	Baoan Hospital of Traditional Chinese Medicine	Medical /Laboratory Technician	2	No	1-5	Yes	Yes	Yes	Yes	No	Not worried	Not applicable	Not applicable	Not applicable	No	No	No	Not applicable	Don’t know							Not hesitant	Disagree	Don’t Know	Strongly Agree	Strongly Agree	Yes	Disagree	Disagree	Agree	Agree	Agree	Strongly Agree	Strongly Agree	Disagree				Strongly Disagree
708	31	Female	Unmarried	Diploma	Primary	Governmental	Baoan Hospital of Traditional Chinese Medicine	Doctor	3	No	0	Yes	Yes	Yes	Yes	No	Not worried	A little worried	A little worried	Not worried	No	No	No	No	Don’t know							Not hesitant	Strongly Agree	Yes	Strongly Agree	Strongly Agree	Yes	Disagree	Disagree	Strongly Disagree	Disagree	Strongly Disagree	Disagree	Disagree	Disagree				Disagree
707	33	Female	Unmarried	Bachelor	Primary	Governmental	Baoan Hospital of Traditional Chinese Medicine	Medical /Laboratory Technician	2	No		Yes	Yes	Yes	Yes	No	Not applicable	Not applicable	Not applicable	Not applicable	Not applicable	Not applicable	Not applicable	Not applicable	Yes	Never	Never	Never	Not worried	Not worried	Not worried	Not hesitant	Strongly Agree	No	Strongly Agree	Strongly Agree	Yes	Disagree	Disagree	Strongly Disagree	Strongly Disagree	Strongly Disagree	Strongly Disagree	Disagree	Strongly Disagree				Strongly Disagree
706	27	Female	Married	Diploma	Primary	Governmental	Baoan Hospital of Traditional Chinese Medicine	Nurse	2	No	1-5	Yes	Yes	Yes	Yes	No	Not worried	A little worried	A little worried	Not worried	No	No	Yes	Yes	Yes	Never	Never	Never	Not worried	Not worried	Not worried	Not hesitant	Agree	Don’t Know	Strongly Agree	Strongly Agree	Yes	Disagree	Disagree	Disagree	Disagree	Disagree	Disagree	Disagree	Disagree				Disagree
705	28	Female	Married	Bachelor	Primary	Governmental	Baoan Hospital of Traditional Chinese Medicine	Nurse	1	No	0	Yes	Yes	Yes	Yes	No	Not worried	A little worried	A little worried	Not worried	No	No	No	No	Yes	Never	Never	Never	Not worried	Not worried	Not worried	Not hesitant	Strongly Agree	Yes	Strongly Agree	Strongly Agree	Yes	Disagree	Disagree	Strongly Disagree	Disagree	Disagree	Disagree	Disagree	Disagree				Disagree
1303	32	Female	Unmarried	Diploma	Primary	Governmental	Baoan Hospital of Traditional Chinese Medicine	Nurse	2	No	1-5	No	Yes	No	No	No	A little worried	A little worried	A little worried	A little worried	No	Yes	Yes	Yes	Yes	Once or twice	Never	Never	Not worried	Not worried	Not worried	Very hesitant	Agree	No	Agree	Strongly Agree	Yes	Disagree	Strongly Disagree	Strongly Disagree	Disagree	Disagree	Disagree	Strongly Agree	Disagree				Disagree
704	20	Female	Married	Diploma	Primary	Governmental	Baoan Hospital of Traditional Chinese Medicine	Nurse	1	No	0	Yes	Yes	Yes	No	No	Not worried	A little worried	A little worried	Not worried	No	No	No	No	No							Not hesitant	Strongly Agree	No	Disagree	Strongly Agree	Yes	Disagree	Disagree	Disagree	Disagree	Disagree	Disagree	Disagree	Disagree				Disagree
703	42	Female	Unmarried	Bachelor	Intermediate	Governmental	Baoan Hospital of Traditional Chinese Medicine	Nurse	4	No	1-5	Yes	Yes	Yes	Yes	No	Not worried	A little worried	A little worried	Not worried	No	No	No	No	Yes	Never	Never	Never	Not worried	Not worried	Not worried	Not hesitant	Strongly Agree	Yes	Strongly Agree	Strongly Agree	Yes	Disagree	Disagree	Strongly Disagree	Disagree	Disagree	Disagree	Disagree	Disagree				Disagree
702	22	Female	Married	Diploma	None	Governmental	Baoan Hospital of Traditional Chinese Medicine	Nurse	1	No		Yes	Yes	Yes	Yes	No	A little worried	A little worried	Not worried	Not worried	No	No	No	Yes	Yes	Never	Never	Never	A little worried	A little worried	Not worried	Not hesitant	Strongly Agree	Yes	Strongly Agree	Strongly Agree	Yes	Disagree	Disagree	Disagree	Disagree	Disagree	Disagree	Disagree	Disagree				Disagree
697	25	Female	Married	Bachelor	Primary	Governmental	Baoan Hospital of Traditional Chinese Medicine	Nurse	1	No		Yes	Yes	Yes	Yes	No	Not worried	Not worried	Not worried	Not worried	No	No	No	No	Yes	Never	Never	Never	Not worried	Not worried	Not worried	Somewhat hesitant	Agree	No	Strongly Agree	Strongly Agree	Yes	Agree	Disagree	Disagree	Disagree	Disagree	Disagree	Disagree	Strongly Agree	Disagree	Agree	Disagree	Disagree
699	23	Female	Married	Diploma	Primary	Governmental	Baoan Hospital of Traditional Chinese Medicine	Nurse	1	No		Yes	Yes	Yes	Yes	No	Not worried	Not worried	Not worried	Not worried	No	No	No	No	Yes	Never	Never	Never	Not worried	Not worried	Not worried	Not hesitant	Agree	No	Strongly Agree	Strongly Agree	Yes	Agree	Disagree	Disagree	Disagree	Disagree	Disagree	Disagree	Disagree				Disagree
693	26	Female	Married	Bachelor	Primary	Governmental	Baoan Hospital of Traditional Chinese Medicine	Nurse	1	No	0	Yes	Yes	Yes	Yes	No	Not worried	A little worried	A little worried	Not worried	No	No	No	Yes	Don’t know							A little hesitant	Strongly Agree	Yes	Strongly Agree	Strongly Agree	Yes	Agree	Agree	Disagree	Disagree	Disagree	Disagree	Disagree	Disagree				Disagree
1238	51	Female	Unmarried	Bachelor	Senior	Governmental	Baoan Hospital of Traditional Chinese Medicine	Nurse	4	No		Yes	Yes	Yes	No	No	Very worried	Very worried	Very worried	Not worried	No	No	Yes	No	Don’t know							Somewhat hesitant	Agree	No	Strongly Agree	Strongly Agree	Yes	Disagree	Disagree	Disagree	Disagree	Disagree	Disagree	Agree	Disagree				Disagree
719	30	Male	Unmarried	Master or higher	Primary	Governmental	Baoan Hospital of Traditional Chinese Medicine	Doctor	1	No		Yes	Yes	Yes	Yes	No	Not worried	A little worried	A little worried	Not worried	Yes	Yes	Yes	No	No							Not hesitant	Agree	No	Strongly Agree	Strongly Agree	Yes	Disagree	Disagree	Disagree	Agree	Disagree	Agree	Agree	Agree	Disagree	Agree	Disagree	Disagree
804	55	Male	Unmarried	Bachelor	Senior	Governmental	Baoan Hospital of Traditional Chinese Medicine	Doctor	4	No		Yes	Yes	Yes	Yes	No	Not worried	Worried	Worried	Not worried	No	No	No	No	No							Not hesitant	Strongly Agree	Yes	Strongly Agree	Strongly Agree	Yes	Disagree	Agree	Disagree	Disagree	Disagree	Agree	Disagree	Disagree				Disagree
698	23	Female	Married	Diploma	Primary	Governmental	Baoan Hospital of Traditional Chinese Medicine	Nurse	1	No		Yes	Yes	Yes	No	No	Not applicable	Not applicable	Worried	Not worried	Not applicable	No	No	Not applicable	Don’t know							Not hesitant	Disagree	Don’t Know	Strongly Agree	Strongly Agree	Yes	Disagree	Disagree	Disagree	Disagree	Disagree	Disagree	Disagree	Disagree				Disagree
696	25	Female	Unmarried	Diploma	Primary	Governmental	Baoan Hospital of Traditional Chinese Medicine	Nurse	1	No	1-5	Yes	Yes	Yes	Yes	No	Not worried	Not worried	Not worried	Not worried	No	Yes	No	Yes	Yes	Never	Never	Never	A little worried	Not worried	Not worried	A little hesitant	Agree	Don’t Know	Strongly Agree	Strongly Agree	No	Disagree	Disagree	Disagree	Disagree	Disagree	Disagree	Agree	Disagree				Disagree
692	27	Female	Unmarried	Bachelor	Primary	Governmental	Baoan Hospital of Traditional Chinese Medicine	Nurse	1	No	0	Yes	Yes	Yes	Yes	No	Not worried	A little worried	A little worried	Not worried	No	No	No	Yes	No							A little hesitant	Strongly Agree	Yes	Strongly Agree	Strongly Agree	Yes	Agree	Agree	Disagree	Disagree	Disagree	Disagree	Disagree	Disagree				Disagree
695	31	Female	Unmarried	Bachelor	Primary	Governmental	Baoan Hospital of Traditional Chinese Medicine	Nurse	3	No	1-5	Yes	Yes	Yes	Yes	No	Not worried	Not worried	Not worried	Not worried	No	No	No	No	Yes	Never	Never	Never	Not worried	Not worried	Not worried	Not hesitant	Agree	No	Strongly Agree	Strongly Agree	Yes	Agree	Disagree	Disagree	Disagree	Disagree	Disagree	Disagree	Disagree				Disagree
737	40	Female	Unmarried	Bachelor	Intermediate	Governmental	Baoan Hospital of Traditional Chinese Medicine	Nurse	4	No	0	Yes	Yes	Yes	Yes	No	A little worried	Very worried	Very worried	A little worried	Yes	Yes	Yes	Yes	Yes	Once or twice	Never	Never	A little worried	A little worried	Not worried	Somewhat hesitant	Disagree	Don’t Know	Strongly Agree	Strongly Agree	Yes	Agree	Agree	Agree	Agree	Disagree	Agree	Strongly Agree	Agree	Agree	Disagree	Agree	Disagree
689	31	Female	Unmarried	Bachelor	Intermediate	Governmental	Baoan Hospital of Traditional Chinese Medicine	Doctor	2	No		Yes	Yes	Yes	Yes	No	Not worried	Not worried	Not applicable	Not worried	No	No	No	No	Yes	Never	Never	Never	Not worried	Not worried	Not worried	Not hesitant	Strongly Agree	Yes	Strongly Agree	Strongly Agree	Yes	Strongly Disagree	Strongly Disagree	Strongly Disagree	Strongly Disagree	Strongly Disagree	Strongly Disagree	Strongly Disagree	Strongly Disagree				Strongly Disagree
691	24	Female	Married	Diploma	None	Governmental	Baoan Hospital of Traditional Chinese Medicine	Receptionist	1	No		Yes	Yes	Yes	Yes	No	Not worried	Not applicable	Not applicable	Not worried	No	Not applicable	Not applicable	Not applicable	Don’t know							Not hesitant	Disagree	Yes	Strongly Agree	Strongly Agree	Yes	Disagree	Disagree	Disagree	Disagree	Disagree	Disagree	Agree	Disagree				Disagree
685	30	Male	Unmarried	Bachelor	Primary	Governmental	Baoan Hospital of Traditional Chinese Medicine	Medical /Laboratory Technician	2	No		Yes	Yes	Yes	Yes	No	Not worried	Not worried	Not worried	Not worried	No	No	No	No	No							Not hesitant	Strongly Agree	Yes	Strongly Agree	Strongly Agree	Yes	Disagree	Strongly Disagree	Disagree	Disagree	Disagree	Disagree	Agree	Disagree				Disagree
688	23	Female	Married	Diploma	Primary	Governmental	Baoan Hospital of Traditional Chinese Medicine	Nurse	1	No	1-5	Yes	Yes	Yes	Yes	No	Not worried	A little worried	A little worried	Not worried	No	Yes	No	No	Yes	Never	Never	Never	Not worried	Not worried	Not worried	Not hesitant	Strongly Agree	Yes	Strongly Agree	Strongly Agree	Yes	Disagree	Strongly Disagree	Disagree	Disagree	Strongly Disagree	Disagree	Disagree	Disagree				Disagree
684	31	Female	Unmarried	Master or higher	Primary	Governmental	Baoan Hospital of Traditional Chinese Medicine	Doctor	1	No	0	Yes	Yes	Yes	Yes	No	Not worried	A little worried	A little worried	Not worried	No	No	No	No	Don’t know							Not hesitant	Strongly Agree	Don’t Know	Strongly Agree	Strongly Agree	Yes	Agree	Disagree	Agree	Disagree	Disagree	Disagree	Agree	Disagree				Disagree
690	38	Male	Unmarried	Diploma	None	Governmental	Baoan Hospital of Traditional Chinese Medicine	Cleaning staff	2	No		No	No	Yes	No	No	A little worried	Not applicable	Not applicable	Not worried	No	Yes	Yes	Yes	Don’t know							A little hesitant	Disagree	Don’t Know	Disagree	Strongly Agree	Don’t Know	Agree	Disagree	Strongly Disagree	Agree	Disagree	Agree	Agree	Disagree				Disagree
782	42	Male	Unmarried	Bachelor	Intermediate	Governmental	Baoan Hospital of Traditional Chinese Medicine	Doctor	4	Yes	1-5	Yes	Yes	Yes	Yes	No	Not worried	Not worried	A little worried	Not worried	Yes	No	No	Yes	Yes	Never	Never	Never	Not worried	Not worried	Not worried	Not hesitant	Strongly Agree	No	Strongly Agree	Strongly Agree	Yes	Strongly Disagree	Strongly Disagree	Strongly Disagree	Strongly Agree	Strongly Disagree	Strongly Disagree	Strongly Agree	Strongly Disagree				Strongly Disagree
683	22	Female	Married	Bachelor	None	Governmental	Baoan Hospital of Traditional Chinese Medicine	Nurse	1	No	0	Yes	Yes	Yes	Yes	No	Not worried	A little worried	A little worried	Not worried	No	No	No	No	No							Not hesitant	Agree	Yes	Strongly Agree	Strongly Agree	Yes	Disagree	Strongly Disagree	Disagree	Disagree	Disagree	Disagree	Disagree	Strongly Disagree				Strongly Disagree
754	27	Female	Unmarried	Bachelor	Primary	Governmental	Baoan Hospital of Traditional Chinese Medicine	Nurse	2	No	1-5	Yes	Yes	Yes	Yes	No	Not worried	Not worried	Not worried	Not worried	Yes	No	Yes	Yes	Yes	Never	Never	Never	Not worried	Not worried	Not worried	A little hesitant	Strongly Agree	No	Strongly Agree	Strongly Agree	Yes	Agree	Disagree	Disagree	Disagree	Disagree	Agree	Agree	Disagree				Disagree
681	47	Female	Unmarried	Bachelor	Senior	Governmental	Baoan Hospital of Traditional Chinese Medicine	Medical /Laboratory Technician	4	No	0	Yes	Yes	Yes	Yes	No	Worried	Very worried	Very worried	A little worried	No	Yes	Yes	Yes	No							Not hesitant	Strongly Agree	Yes	Strongly Agree	Strongly Agree	Yes	Strongly Agree	Disagree	Disagree	Disagree	Disagree	Disagree	Disagree	Disagree				Disagree
682	32	Female	Married	Master or higher	Intermediate	Governmental	Baoan Hospital of Traditional Chinese Medicine	Doctor	2	No		Yes	Yes	Yes	Yes	No	Not worried	Not worried	Not worried	Not worried	No	No	No	No	No							Not hesitant	Agree	Yes	Strongly Agree	Strongly Agree	Yes	Disagree	Disagree	Disagree	Disagree	Disagree	Disagree	Agree	Strongly Disagree				Strongly Disagree
700	59	Male	Unmarried	High school or others	None	Governmental	Baoan Hospital of Traditional Chinese Medicine	Cleaning staff	2	No	1-5	Yes	Yes	No	No	No	Not worried	Not applicable	Not applicable	Not applicable	No	No	No	No	Don’t know							Not hesitant	Agree	No	Strongly Agree	Strongly Agree	Yes	Strongly Disagree	Strongly Disagree	Strongly Disagree	Strongly Disagree	Strongly Disagree	Strongly Disagree	Strongly Disagree	Strongly Disagree				Strongly Disagree
680	45	Female	Unmarried	Bachelor	Senior	Governmental	Baoan Hospital of Traditional Chinese Medicine	Medical /Laboratory Technician	4	No	0	Yes	Yes	Yes	Yes	No	A little worried	Worried	Very worried	A little worried	No	Yes	Yes	Yes	No							Not hesitant	Strongly Agree	Yes	Strongly Agree	Strongly Agree	Yes	Strongly Agree	Disagree	Disagree	Disagree	Disagree	Disagree	Disagree	Disagree				Disagree
678	54	Male	Remarried	Bachelor	Senior	Governmental	Baoan Hospital of Traditional Chinese Medicine	Doctor	4	No	1-5	Yes	Yes	Yes	No	No	A little worried	Worried	Not applicable	Not worried	No	No	Yes	Yes	Yes	Never	Never	Never	Not worried	A little worried	Not worried	A little hesitant	Strongly Agree	Yes	Strongly Agree	Strongly Agree	Yes	Agree	Disagree	Disagree	Disagree	Disagree	Disagree	Agree	Agree	Disagree	Agree	Disagree	Disagree
677	38	Male	Unmarried	Master or higher	Senior	Governmental	Baoan Hospital of Traditional Chinese Medicine	Doctor	3	No		Yes	Yes	Yes	Yes	No	Not worried	Not worried	Not worried	Not worried	No	No	No	Yes	Yes	Never	Never	Never	Not worried	Not worried	Not worried	A little hesitant	Agree	Yes	Strongly Agree	Strongly Agree	Yes	Agree	Disagree	Agree	Agree	Disagree	Agree	Agree	Strongly Disagree				Strongly Disagree
1297	67	Male	Unmarried	Bachelor	Senior	Governmental	Baoan Hospital of Traditional Chinese Medicine	Doctor	4	No		Yes	Yes	Yes	Yes	No	Not worried	Not worried	Not worried	Not worried	No	Yes	No	Yes	Yes	Never	Never	Never	Not worried	Not worried	Not worried	Not hesitant	Strongly Agree	Yes	Strongly Agree	Strongly Agree	Yes	Disagree	Disagree	Strongly Disagree	Strongly Disagree	Strongly Disagree	Strongly Disagree	Strongly Agree	Strongly Disagree				Strongly Disagree
679	25	Male	Married	Bachelor	Primary	Governmental	Baoan Hospital of Traditional Chinese Medicine	Nurse	1	No	0	Yes	Yes	Yes	Yes	No	Not applicable	Not applicable	Not applicable	Not worried	No	Yes	No	No	No							Somewhat hesitant	Strongly Agree	Don’t Know	Strongly Agree	Strongly Agree	Don’t Know	Strongly Disagree	Strongly Disagree	Strongly Disagree	Strongly Disagree	Strongly Disagree	Strongly Disagree	Strongly Disagree	Strongly Disagree				Strongly Disagree
733	35	Female	Unmarried	Bachelor	Intermediate	Governmental	Baoan Hospital of Traditional Chinese Medicine	Medical /Laboratory Technician	3	Yes		Yes	Yes	Yes	Yes	No	Not worried	Not applicable	Not worried	Not worried	No	No	No	No	Yes	Never	Never	Never	Not worried	Not worried	Not worried	A little hesitant	Agree	Don’t Know	Strongly Agree	Strongly Agree	Yes	Disagree	Disagree	Disagree	Disagree	Disagree	Disagree	Agree	Disagree				Disagree
792	23	Male	Married	Diploma	Primary	Governmental	Baoan Hospital of Traditional Chinese Medicine	Nurse	1	Yes	1-5	Yes	Yes	No	No	No	Not worried	Not worried	Not worried	Not worried	No	No	Yes	No	Yes	Never	Never	Never	Not worried	Not worried	Not worried	Not hesitant	Agree	No	Strongly Agree	Strongly Agree	Yes	Strongly Disagree	Strongly Disagree	Strongly Disagree	Strongly Disagree	Strongly Disagree	Strongly Disagree	Strongly Disagree	Strongly Disagree				Strongly Disagree
791	25	Female	Married	Diploma	Primary	Governmental	Baoan Hospital of Traditional Chinese Medicine	Nurse	1	No		Yes	Yes	No	No	No	Not worried	Not worried	Not worried	Not worried	No	No	Yes	No	Yes	Never	Never	Never	Not worried	Not worried	Not worried	Not hesitant	Agree	No	Strongly Agree	Strongly Agree	Yes	Strongly Disagree	Strongly Disagree	Strongly Disagree	Strongly Disagree	Strongly Disagree	Strongly Disagree	Strongly Disagree	Strongly Disagree				Strongly Disagree
731	48	Female	Unmarried	High school or others	None	Governmental	Baoan Hospital of Traditional Chinese Medicine	Nursing worker	1	No	0	Yes	Yes	No	No	No	Not worried	Not applicable	Not applicable	Not applicable	No	No	No	No	Don’t know							Not hesitant	Agree	No	Strongly Agree	Strongly Agree	Yes	Strongly Disagree	Strongly Disagree	Strongly Disagree	Strongly Disagree	Strongly Disagree	Strongly Disagree	Strongly Disagree	Strongly Disagree				Strongly Disagree
1344	30	Female	Married	Master or higher	Primary	Governmental	Baoan Hospital of Traditional Chinese Medicine	Doctor	1	No		No	Yes	Yes	No	No	Not applicable	Not applicable	Not applicable	Not applicable	No	No	Yes	No	Don’t know							Not hesitant	Disagree	No	Strongly Agree	Strongly Agree	Don’t Know	Disagree	Disagree	Agree	Disagree	Disagree	Agree	Agree	Disagree				Strongly Disagree
1292	35	Female	Unmarried	Bachelor	Intermediate	Governmental	Baoan Hospital of Traditional Chinese Medicine	Medical /Laboratory Technician	3	No	1-5	No	Yes	Yes	No	No	Worried	Not applicable	Not applicable	Not applicable	Yes	Yes	Yes	Yes	Yes	Never	Never	Never	A little worried	Not worried	Not worried	A little hesitant	Disagree	Don’t Know	Strongly Agree	Strongly Agree	Yes	Agree	Agree	Agree	Agree	Disagree	Strongly Disagree	Agree	Agree	Agree	Agree	Agree	Agree
805	53	Male	Unmarried	Bachelor	Senior	Governmental	Baoan Hospital of Traditional Chinese Medicine	Doctor	4	No	0	Yes	Yes	Yes	No	No	Not worried	Not worried	Not worried	Not worried	No	No	No	No	Don’t know							Not hesitant	Strongly Agree	No	Strongly Agree	Strongly Agree	Yes	Disagree	Disagree	Disagree	Disagree	Disagree	Disagree	Disagree	Disagree				Disagree
674	38	Male	Unmarried	Bachelor	Senior	Governmental	Baoan Hospital of Traditional Chinese Medicine	Anesthetist	3	No		Yes	Yes	Yes	No	No	Not worried	A little worried	A little worried	Not worried	No	Yes	Yes	Yes	Don’t know							A little hesitant	Strongly Agree	Don’t Know	Strongly Agree	Strongly Agree	Yes	Disagree	Disagree	Disagree	Disagree	Disagree	Disagree	Strongly Agree	Disagree				Disagree
712	46	Male	Unmarried	Bachelor	Intermediate	Governmental	Baoan Hospital of Traditional Chinese Medicine	Pharmacist	3	No		Yes	Yes	Yes	Yes	No	A little worried	Very worried	A little worried	A little worried	No	No	Yes	No	No							A little hesitant	Strongly Agree	No	Strongly Agree	Strongly Agree	Yes	Agree	Agree	Agree	Disagree	Disagree	Disagree	Agree	Disagree				Disagree
741	43	Male	Unmarried	Master or higher	Senior	Governmental	Baoan Hospital of Traditional Chinese Medicine	Doctor	3	No		No	Yes	Yes	No	No	Not worried	Not worried	A little worried	Not worried	No	No	No	No	No							Not hesitant	Strongly Agree	Don’t Know	Strongly Agree	Strongly Agree	Yes	Disagree	Disagree	Disagree	Disagree	Disagree	Agree	Agree	Disagree				Disagree
751	55	Male	Unmarried	High school or others	Primary	Governmental	Baoan Hospital of Traditional Chinese Medicine	Cashier	4	No		Yes	Yes	No	No	No	Not applicable	Not applicable	Not applicable	Not applicable	Not applicable	Not applicable	Not applicable	Not applicable	Don’t know							Not hesitant	Agree	No	Agree	Strongly Agree	Yes	Strongly Disagree	Strongly Disagree	Strongly Disagree	Strongly Disagree	Strongly Disagree	Strongly Disagree	Strongly Disagree	Strongly Disagree				Strongly Disagree
1298	26	Female	Married	Master or higher	Primary	Governmental	Baoan Hospital of Traditional Chinese Medicine	Doctor	1	No		No	Yes	Yes	No	No	Not worried	A little worried	A little worried	Not worried	No	No	No	No	Don’t know							Not hesitant	Strongly Agree	Yes	Strongly Agree	Strongly Agree	Yes	Disagree	Disagree	Disagree	Disagree	Disagree	Disagree	Disagree	Disagree				Disagree
1008	24	Female	Married	Diploma	Primary	Governmental	Baoan Hospital of Traditional Chinese Medicine	Nurse	1	No		Yes	Yes	Yes	Yes	No	A little worried	A little worried	A little worried	Not worried	No	Yes	Yes	Yes	Don’t know							Not hesitant	Strongly Agree	Yes	Strongly Agree	Strongly Agree	Yes	Agree	Disagree	Disagree	Disagree	Disagree	Disagree	Disagree	Disagree				Disagree
729	33	Male	Married	Master or higher	Intermediate	Governmental	Baoan Hospital of Traditional Chinese Medicine	Doctor	2	No		Yes	Yes	Yes	Yes	No	A little worried	Very worried	Worried	Not worried	No	Yes	No	Yes	Yes	Never	Never	Never	Not worried	Not worried	Not worried	Not hesitant	Strongly Agree	No	Strongly Agree	Strongly Agree	Yes	Agree	Agree	Disagree	Disagree	Disagree	Disagree	Strongly Agree	Disagree				Disagree
789	25	Female	Unmarried	Diploma	Primary	Governmental	Baoan Hospital of Traditional Chinese Medicine	Nurse	1	No	6-10	Yes	Yes	No	No	No	Very worried	Very worried	Very worried	Very worried	No	Yes	Yes	Yes	Yes	Never	Never	Once or twice	Not worried	Not worried	Not worried	A little hesitant	Strongly Agree	Yes	Disagree	Strongly Agree	Don’t Know	Disagree	Disagree	Agree	Agree	Agree	Agree	Strongly Agree	Strongly Agree	Agree	Agree	Disagree	Disagree
1300	62	Male	Unmarried	Master or higher	Senior	Governmental	Baoan Hospital of Traditional Chinese Medicine	Doctor	4	No	1-5	Yes	Yes	Yes	No	No	Not worried	Not worried	Not worried	Not worried	No	No	Yes	No	Yes	Never	Never	Never	Not worried	Not worried	Not worried	Not hesitant	Agree	No	Strongly Agree	Strongly Agree	Yes	Disagree	Disagree	Disagree	Disagree	Disagree	Disagree	Agree	Disagree				Disagree
728	54	Female	Unmarried	High school or others	None	Governmental	Baoan Hospital of Traditional Chinese Medicine	Nursing worker	1	No	0	Yes	Yes	Yes	No	No	A little worried	Not applicable	Not applicable	Not applicable	Not applicable	No	No	No	Don’t know							Not hesitant	Disagree	Don’t Know	Strongly Agree	Strongly Agree	Yes	Disagree	Disagree	Disagree	Disagree	Disagree	Disagree	Disagree	Agree	Agree	Disagree	Disagree	Agree
910	33	Female	Unmarried	Bachelor	Intermediate	Governmental	Baoan Hospital of Traditional Chinese Medicine	Doctor	2	No	6-10	Yes	Yes	Yes	Yes	No	A little worried	A little worried	A little worried	Not worried	No	Yes	Yes	Yes	Yes	Never	Never	Never	Not worried	Not worried	Not worried	Not hesitant	Strongly Agree	Yes	Strongly Agree	Strongly Agree	Yes	Disagree	Strongly Disagree	Strongly Disagree	Disagree	Disagree	Agree	Agree	Strongly Disagree				Strongly Disagree
1230	30	Male	Unmarried	Bachelor	Primary	Governmental	Baoan Hospital of Traditional Chinese Medicine	Nurse	2	No	0	Yes	Yes	Yes	Yes	No	A little worried	A little worried	A little worried	A little worried	No	Yes	Yes	Yes	No							A little hesitant	Agree	No	Strongly Agree	Strongly Agree	No	Agree	Agree	Disagree	Disagree	Disagree	Agree	Agree	Disagree				Disagree
749	38	Female	Unmarried	Master or higher	Senior	Governmental	Baoan Hospital of Traditional Chinese Medicine	Doctor	3	No	1-5	Yes	Yes	Yes	Yes	No	Not worried	Not worried	Not worried	Not worried	No	No	No	No	Yes	Never	Never	Never	Not worried	Not worried	Not worried	Not hesitant	Strongly Agree	No	Strongly Agree	Strongly Agree	Yes	Disagree	Disagree	Disagree	Disagree	Disagree	Disagree	Disagree	Disagree				Disagree
724	54	Male	Unmarried	High school or others	None	Governmental	Baoan Hospital of Traditional Chinese Medicine	Cleaning staff	2	No		Yes	Yes	No	No	No	Not worried	Not applicable	Not applicable	Not applicable	No	No	Not applicable	No	Don’t know							Not hesitant	Agree	No	Strongly Agree	Strongly Agree	Yes	Strongly Disagree	Strongly Disagree	Strongly Disagree	Strongly Disagree	Strongly Disagree	Strongly Disagree	Strongly Disagree	Strongly Disagree				Strongly Disagree
1337	30	Male	Unmarried	Diploma	Primary	Governmental	Baoan Hospital of Traditional Chinese Medicine	Obstetrician and Gynecologist	2	No		Yes	No	No	Yes	No	Not worried	A little worried	A little worried	Not worried	No	No	Yes	No	Don’t know							A little hesitant	Strongly Agree	Yes	Agree	Agree	Yes	Agree	Disagree	Strongly Disagree	Strongly Agree	Disagree	Disagree	Strongly Agree	Disagree				Disagree
842	22	Female	Married	Diploma	Primary	Governmental	Baoan Hospital of Traditional Chinese Medicine	Nurse	1	No	0	No	Yes	Yes	Yes	No	Not applicable	Not applicable	Not applicable	Not applicable	Not applicable	Not applicable	Not applicable	Not applicable	Don’t know							A little hesitant	Agree	Don’t Know	Disagree	Disagree	Don’t Know	Strongly Disagree	Strongly Disagree	Strongly Disagree	Strongly Disagree	Strongly Disagree	Strongly Disagree	Strongly Disagree	Strongly Disagree				Strongly Disagree
774	27	Male	Unmarried	Master or higher	Primary	Governmental	Baoan Hospital of Traditional Chinese Medicine	Doctor	1	No	1-5	Yes	Yes	Yes	Yes	No	A little worried	A little worried	A little worried	Not worried	No	No	No	Yes	No							Not hesitant	Agree	Yes	Strongly Agree	Strongly Agree	Yes	Disagree	Disagree	Disagree	Disagree	Disagree	Disagree	Agree	Strongly Disagree				Strongly Disagree
1197	35	Male	Unmarried	Bachelor	Intermediate	Governmental	Baoan Hospital of Traditional Chinese Medicine	Pharmacist	3	No	0	Yes	Yes	Yes	Yes	No	Not applicable	Not applicable	Not applicable	Not applicable	Not applicable	Yes	Not applicable	Not applicable	Don’t know							A little hesitant	Strongly Agree	Yes	Strongly Agree	Strongly Agree	Yes	Agree	Disagree	Disagree	Disagree	Disagree	Agree	Agree	Disagree				Disagree
1309	35	Female	Unmarried	Master or higher	Intermediate	Governmental	Baoan Hospital of Traditional Chinese Medicine	Doctor	3	No	1-5	No	Yes	Yes	No	No	Not worried	Not worried	Not applicable	Not applicable	No	Yes	Yes	Yes	Yes	Never	Never	Never	A little worried	A little worried	Not worried	Somewhat hesitant	Agree	Yes	Disagree	Disagree	Don’t Know	Agree	Disagree	Agree	Disagree	Disagree	Disagree	Disagree	Disagree				Disagree
722	44	Female	Unmarried	Bachelor	Primary	Governmental	Baoan Hospital of Traditional Chinese Medicine	Medical /Laboratory Technician	4	No	0	Yes	Yes	Yes	Yes	No	Not worried	Not worried	Not worried	Not worried	No	No	No	No	Yes	Never	Never	Never	Not worried	Not worried	Not worried	Not hesitant	Strongly Agree	No	Strongly Agree	Strongly Agree	Yes	Disagree	Disagree	Disagree	Disagree	Disagree	Disagree	Disagree	Disagree				Disagree
1333	28	Female	Unmarried	High school or others	Intermediate	Private	Baoan Hospital of Traditional Chinese Medicine	Nurse	2	Yes	1-5	No	Yes	Yes	No	No	Not worried	Worried	Very worried	Worried	Yes	Yes	Yes	Not applicable	Yes	Never	Several times	Several times	Worried	Worried	Worried	Somewhat hesitant	Strongly Agree	Yes	Strongly Agree	Strongly Agree	Yes	Agree	Strongly Agree	Disagree	Disagree	Strongly Agree	Strongly Agree	Strongly Agree	Strongly Agree	Agree	Disagree	Disagree	Disagree
1126	23	Female	Married	Diploma	Primary	Private	Shenzhen Wanfeng Hospital	Nurse	1	No		No	Yes	No	No	No	A little worried	Very worried	Very worried	Not worried	No	Yes	Yes	Yes	No							Not hesitant	Strongly Agree	Yes	Strongly Agree	Strongly Agree	Yes	Agree	Agree	Disagree	Disagree	Disagree	Strongly Agree	Strongly Agree	Disagree				Disagree
1127	23	Male	Married	Diploma	Primary	Private	Shenzhen Wanfeng Hospital	Medical /Laboratory Technician	1	No		Yes	Yes	Yes	Yes	No	A little worried	A little worried	A little worried	A little worried	No	Yes	Yes	Yes	Don’t know							A little hesitant	Agree	Yes	Strongly Agree	Strongly Agree	Yes	Disagree	Disagree	Disagree	Disagree	Disagree	Agree	Agree	Agree	Disagree	Agree	Agree	Agree
1120	28	Female	Married	Diploma	Primary	Private	Shenzhen Wanfeng Hospital	Midwife	1	No		Yes	Yes	Yes	Yes	No	Not worried	A little worried	Not worried	Not worried	No	Yes	No	Yes	No							Not hesitant	Strongly Agree	Yes	Strongly Agree	Strongly Agree	Yes	Disagree	Strongly Disagree	Disagree	Disagree	Strongly Disagree	Disagree	Disagree	Disagree				Disagree
1130	55	Male	Unmarried	High school or others	None	Private	Shenzhen Wanfeng Hospital	Cleaning staff	2	No	0	No	No	No	No	Yes	Not worried	A little worried	Not applicable	Not applicable	No	Not applicable	Not applicable	Not applicable	No							A little hesitant	Disagree	No	Disagree	Disagree	No	Strongly Disagree	Disagree	Strongly Disagree	Disagree	Agree	Agree	Disagree	Disagree				Disagree
1123	35	Female	Unmarried	Diploma	Intermediate	Private	Shenzhen Wanfeng Hospital	Medical /Laboratory Technician	3	No		Yes	Yes	Yes	No	No	Worried	Very worried	A little worried	Not worried	No	No	Yes	Yes	No							A little hesitant	Agree	No	Strongly Agree	Strongly Agree	Yes	Agree	Disagree	Disagree	Disagree	Disagree	Agree	Agree	Agree	Agree	Disagree	Disagree	Disagree
1125	58	Female	Unmarried	Diploma	Senior	Private	Shenzhen Wanfeng Hospital	Doctor	4	No		Yes	Yes	Yes	No	No	Not applicable	Not applicable	Not applicable	Not applicable	Not applicable	Yes	Yes	Yes	Don’t know							Somewhat hesitant	Agree	No	Disagree	Strongly Agree	Yes	Disagree	Disagree	Strongly Disagree	Agree	Disagree	Agree	Agree	Agree	Disagree	Disagree	Agree	Agree
1124	27	Male	Married	Diploma	Primary	Private	Shenzhen Wanfeng Hospital	Medical /Laboratory Technician	1	No		No	Yes	Yes	No	No	Not worried	Not worried	Not worried	Not worried	No	Yes	Yes	Yes	Don’t know							Not hesitant	Strongly Agree	No	Strongly Agree	Strongly Agree	No	Agree	Disagree	Disagree	Disagree	Disagree	Disagree	Disagree	Disagree				Disagree
1115	57	Female	Unmarried	Diploma	Intermediate	Private	Shenzhen Wanfeng Hospital	Obstetrician and Gynecologist	4	Yes		Yes	Yes	Yes	Yes	No	Not worried	Not worried	Not worried	Not worried	No	No	No	Yes	No							Not hesitant	Agree	Yes	Strongly Agree	Strongly Agree	Yes	Disagree	Disagree	Agree	Strongly Disagree	Disagree	Disagree	Disagree	Disagree				Disagree
1121	55	Male	Unmarried	High school or others	Intermediate	Private	Shenzhen Wanfeng Hospital	Cleaning staff	1	Yes		No	Yes	Yes	No	No	Worried	A little worried	A little worried	A little worried	Yes	Yes	Yes	Yes	Yes	Several times	Once or twice	Several times	Not worried	Very worried	Not worried	Not hesitant	Strongly Agree	Yes	Strongly Agree	Agree	No	Disagree	Agree	Agree	Strongly Agree	Agree	Strongly Agree	Disagree	Strongly Agree	Agree	Disagree	Disagree	Strongly Agree
1103	23	Female	Unmarried	Diploma	Primary	Private	Shenzhen Wanfeng Hospital	Nurse	1	No	≥11	Yes	Yes	Yes	No	No	A little worried	Very worried	Very worried	Worried	No	Yes	No	No	Yes	Never	Never	Never	Worried	A little worried	A little worried	Somewhat hesitant	Agree	Don’t Know	Agree	Agree	Don’t Know	Strongly Agree	Agree	Agree	Agree	Strongly Disagree	Disagree	Strongly Agree	Agree	Agree	Agree	Agree	Agree
1106	30	Female	Unmarried	Bachelor	Primary	Private	Shenzhen Wanfeng Hospital	Obstetrician and Gynecologist	1	No	0	Yes	No	No	No	No	Not worried	Not worried	Not worried	Not worried	Yes	No	Yes	Yes	No							Not hesitant	Strongly Agree	No	Strongly Agree	Strongly Agree	Yes	Strongly Disagree	Disagree	Disagree	Disagree	Disagree	Agree	Agree	Disagree				Disagree
1116	56	Male	Unmarried	High school or others	Primary	Private	Shenzhen Wanfeng Hospital	Cleaning staff	2	No		No	No	Yes	No	No	A little worried	A little worried	A little worried	Not applicable	Not applicable	Yes	Yes	Not applicable	Yes	Never	Never	Never	Not worried	Not worried	Not worried	Not hesitant	Strongly Agree	Don’t Know	Disagree	Disagree	Don’t Know	Strongly Disagree	Strongly Disagree	Strongly Disagree	Strongly Disagree	Agree	Strongly Disagree	Agree	Strongly Disagree				Disagree
1108	50	Female	Unmarried	Bachelor	Intermediate	Private	Shenzhen Wanfeng Hospital	Obstetrician and Gynecologist	4	No		Yes	Yes	Yes	Yes	No	Worried	A little worried	A little worried	A little worried	Not applicable	Yes	Yes	Yes	Yes	Never	Never	Never	Not worried	Not worried	Not worried	A little hesitant	Strongly Agree	Yes	Strongly Agree	Strongly Agree	Yes	Disagree	Strongly Disagree	Strongly Disagree	Strongly Disagree	Disagree	Disagree	Agree	Strongly Disagree				Disagree
1101	46	Male	Unmarried	Diploma	Intermediate	Private	Shenzhen Wanfeng Hospital	Medical /Laboratory Technician	4	No	1-5	No	Yes	Yes	No	No	Not worried	Not worried	Not worried	Not worried	No	Yes	Yes	Yes	Yes	Several times	Once or twice	Never	Not worried	Not worried	Not worried	Not hesitant	Strongly Agree	Yes	Strongly Agree	Strongly Agree	Yes	Agree	Strongly Disagree	Strongly Disagree	Strongly Disagree	Strongly Disagree	Disagree	Disagree	Strongly Disagree				Disagree
1113	50	Female	Unmarried	Bachelor	Intermediate	Private	Shenzhen Wanfeng Hospital	Obstetrician and Gynecologist	4	Yes	0	Yes	Yes	Yes	Yes	No	Not worried	Not worried	Not worried	Not worried	No	Yes	No	Yes	Don’t know							Not hesitant	Strongly Agree	No	Strongly Agree	Strongly Agree	Yes	Agree	Disagree	Agree	Agree	Disagree	Strongly Disagree	Disagree	Disagree				Disagree
1114	50	Female	Unmarried	Bachelor	Intermediate	Private	Shenzhen Wanfeng Hospital	Medical /Laboratory Technician	4	No	1-5	Yes	Yes	Yes	Yes	No	A little worried	A little worried	A little worried	A little worried	No	Yes	Yes	Yes	Yes	Never	Never	Never	Not worried	Not worried	Not worried	Not hesitant	Agree	Yes	Strongly Agree	Strongly Agree	Yes	Disagree	Disagree	Disagree	Disagree	Disagree	Agree	Strongly Agree	Disagree				Agree
1158	23	Female	Married	Diploma	Primary	Private	Shenzhen Wanfeng Hospital	Nurse	1	No		Yes	Yes	No	Yes	No	Not worried	A little worried	A little worried	Not worried	No	No	No	Yes	No							Not hesitant	Agree	Yes	Strongly Agree	Strongly Agree	Yes	Agree	Agree	Agree	Strongly Agree	Disagree	Disagree	Disagree	Disagree				Disagree
1107	50	Female	Unmarried	Diploma	Intermediate	Private	Shenzhen Wanfeng Hospital	Obstetrician and Gynecologist	4	Yes	0	No	Yes	Yes	No	No	Not applicable	Not worried	Not worried	Not worried	Not applicable	Not applicable	Not applicable	Not applicable	Yes	Once or twice	Never	Never	Not worried	Not worried	Not worried	Not hesitant	Strongly Agree	Yes	Strongly Agree	Strongly Agree	Yes	Agree	Strongly Disagree	Disagree	Disagree	Disagree	Disagree	Disagree	Disagree				Disagree
1099	54	Male	Unmarried	Bachelor	Senior	Private	Shenzhen Wanfeng Hospital	Doctor	4	No	1-5	No	Yes	Yes	No	No	Not worried	Not applicable	Not applicable	Not worried	No	No	No	Yes	No							A little hesitant	Strongly Agree	Yes	Strongly Agree	Strongly Agree	Don’t Know	Agree	Agree	Agree	Agree	Disagree	Disagree	Agree	Disagree				Disagree
1090	23	Female	Married	Diploma	Primary	Private	Shenzhen Wanfeng Hospital	Nurse	1	No	≥11	Yes	Yes	Yes	No	No	A little worried	Worried	A little worried	A little worried	No	Yes	Yes	Yes	Yes	Never	Never	Never	Not worried	Not worried	Not worried	Somewhat hesitant	Agree	No	Agree	Agree	No	Disagree	Agree	Agree	Disagree	Disagree	Agree	Agree	Disagree				Disagree
1088	25	Female	Married	Diploma	Primary	Private	Shenzhen Wanfeng Hospital	Nurse	1	No	1-5	No	Yes	Yes	No	No	Not applicable	Not applicable	Not applicable	Not applicable	No	Yes	Yes	No	Yes	Never	Never	Never	Not worried	Not worried	Not worried	A little hesitant	Disagree	Don’t Know	Strongly Agree	Strongly Agree	Don’t Know	Disagree	Disagree	Disagree	Disagree	Disagree	Strongly Disagree	Strongly Disagree	Disagree				Disagree
1093	19	Female	Married	High school or others	Primary	Private	Shenzhen Wanfeng Hospital	Nurse	1	No	0	Yes	Yes	Yes	Yes	No	Worried	Very worried	Not applicable	A little worried	Yes	Yes	Yes	Yes	Don’t know							A little hesitant	Strongly Agree	Don’t Know	Agree	Strongly Agree	No	Strongly Agree	Disagree	Disagree	Agree	Disagree	Strongly Agree	Strongly Agree	Agree	Agree	Agree	Disagree	Agree
1102	55	Female	Unmarried	Diploma	Intermediate	Private	Shenzhen Wanfeng Hospital	Obstetrician and Gynecologist	4	No		Yes	Yes	No	No	No	Not worried	A little worried	A little worried	Not worried	No	No	No	No	No							Not hesitant	Agree	Yes	Strongly Agree	Strongly Agree	Yes	Disagree	Strongly Disagree	Strongly Disagree	Strongly Disagree	Strongly Disagree	Strongly Disagree	Agree	Strongly Agree	Disagree	Agree	Agree	Disagree
1089	40	Male	Unmarried	Diploma	Intermediate	Private	Shenzhen Wanfeng Hospital	Cleaning staff	2	No		Yes	Yes	No	No	No	A little worried	A little worried	Not worried	A little worried	No	Yes	Yes	Yes	Yes	Once or twice	Never	Never	A little worried	A little worried	Worried	Not hesitant	Agree	Don’t Know	Strongly Agree	Strongly Agree	Yes	Agree	Disagree	Disagree	Disagree	Disagree	Disagree	Disagree	Disagree				Disagree
1092	30	Female	Unmarried	Diploma	Primary	Private	Shenzhen Wanfeng Hospital	Nurse	2	No	1-5	Yes	Yes	No	Yes	No	A little worried	Not applicable	Not applicable	Not worried	No	Yes	Not applicable	Not applicable	Don’t know							A little hesitant	Disagree	Don’t Know	Strongly Agree	Disagree	Don’t Know	Disagree	Disagree	Disagree	Disagree	Strongly Disagree	Strongly Disagree	Disagree	Disagree				Disagree
1085	22	Female	Married	Diploma	Primary	Private	Shenzhen Wanfeng Hospital	Midwife	1	No	0	Yes	Yes	Yes	No	No	Worried	Very worried	Very worried	A little worried	Yes	Yes	Yes	Yes	Don’t know							A little hesitant	Agree	Yes	Strongly Agree	Strongly Agree	Yes	Agree	Disagree	Disagree	Disagree	Disagree	Strongly Agree	Strongly Agree	Disagree				Disagree
1095	36	Male	Married	Bachelor	Intermediate	Private	Shenzhen Wanfeng Hospital	Doctor	2	Yes	1-5	Yes	Yes	Yes	No	No	A little worried	Worried	Not applicable	Not worried	No	No	No	Yes	Yes	Never	Never	Never	A little worried	Not worried	A little worried	A little hesitant	Agree	Yes	Strongly Agree	Strongly Agree	No	Disagree	Disagree	Disagree	Agree	Agree	Disagree	Disagree	Disagree				Disagree
1080	40	Female	Unmarried	Bachelor	Intermediate	Private	Shenzhen Wanfeng Hospital	Medical /Laboratory Technician	3	No	≥11	Yes	Yes	No	No	No	A little worried	Not applicable	A little worried	Not applicable	No	Yes	Yes	No	Yes	Never	Never	Never	Not worried	Not worried	Not worried	Not hesitant	Strongly Agree	Don’t Know	Strongly Agree	Strongly Agree	Yes	Disagree	Disagree	Strongly Disagree	Disagree	Disagree	Disagree	Agree	Disagree				Disagree
1105	49	Male	Unmarried	High school or others	None	Private	Shenzhen Wanfeng Hospital	Cleaning staff	1	No	0	No	No	No	No	Yes	Not worried	Very worried	Very worried	Worried	Yes	Yes	Yes	Yes	No							Somewhat hesitant	Disagree	Don’t Know	Strongly Agree	Disagree	Don’t Know	Strongly Agree	Disagree	Disagree	Agree	Agree	Agree	Agree	Agree	Disagree	Disagree	Agree	Agree
1111	52	Female	Unmarried	Bachelor	Intermediate	Private	Shenzhen Wanfeng Hospital	Obstetrician and Gynecologist	4	No		No	Yes	No	No	No	A little worried	A little worried	A little worried	Not worried	No	Yes	No	Yes	No							A little hesitant	Agree	No	Agree	Agree	No	Strongly Agree	Disagree	Disagree	Disagree	Disagree	Disagree	Disagree	Disagree				Disagree
1083	28	Female	Unmarried	Diploma	Primary	Private	Shenzhen Wanfeng Hospital	Nurse	2	No		Yes	Yes	Yes	No	No	Worried	Very worried	Very worried	Not worried	Yes	Yes	Yes	Yes	Don’t know							A little hesitant	Strongly Agree	Yes	Strongly Agree	Strongly Agree	Yes	Agree	Disagree	Agree	Disagree	Disagree	Agree	Strongly Agree	Disagree				Disagree
1086	22	Female	Unmarried	Diploma	Primary	Private	Shenzhen Wanfeng Hospital	Nurse	1	Yes	1-5	No	Yes	Yes	Yes	No	A little worried	Worried	Worried	Not worried	No	Yes	No	Yes	Yes	Never	Never	Never	Not worried	Not worried	Not worried	A little hesitant	Agree	Yes	Strongly Agree	Strongly Agree	Yes	Agree	Disagree	Disagree	Disagree	Disagree	Disagree	Agree	Agree	Agree	Disagree	Agree	Agree
1079	34	Male	Unmarried	Diploma	Primary	Private	Shenzhen Wanfeng Hospital	Pharmacist	2	No	0	Yes	No	No	No	No	A little worried	Worried	Worried	A little worried	Yes	No	Yes	Yes	Don’t know							A little hesitant	Strongly Agree	Don’t Know	Strongly Agree	Strongly Agree	No	Disagree	Disagree	Disagree	Disagree	Disagree	Agree	Agree	Disagree				Disagree
1196	29	Female	Married	High school or others	None	Private	Shenzhen Wanfeng Hospital	Nurse	1	No		No	No	Yes	No	No	Not worried	Not worried	Not worried	Not worried	Yes	Yes	Yes	Yes	No							Not hesitant	Agree	No	Strongly Agree	Strongly Agree	Yes	Disagree	Disagree	Disagree	Disagree	Disagree	Disagree	Disagree	Disagree				Disagree
1100	51	Male	Unmarried	Bachelor	Senior	Private	Shenzhen Wanfeng Hospital	Medical /Laboratory Technician	4	No	1-5	No	Yes	Yes	No	No	Not worried	Not applicable	Not applicable	Not applicable	No	No	No	No	Yes	Never	Never	Never	Not worried	Not worried	Not worried	A little hesitant	Disagree	Yes	Strongly Agree	Strongly Agree	Yes	Disagree	Disagree	Strongly Disagree	Strongly Disagree	Strongly Disagree	Agree	Agree	Agree	Disagree	Agree	Disagree	Agree
1096	23	Female	Married	Diploma	Primary	Private	Shenzhen Wanfeng Hospital	Nurse	1	No	0	No	Yes	No	No	No	A little worried	Worried	A little worried	Not worried	Not applicable	Yes	No	Yes	Don’t know							Somewhat hesitant	Disagree	Don’t Know	Strongly Agree	Strongly Agree	Don’t Know	Agree	Strongly Disagree	Disagree	Disagree	Strongly Disagree	Agree	Agree	Agree	Disagree	Disagree	Agree	Agree
1084	28	Female	Unmarried	Diploma	Primary	Private	Shenzhen Wanfeng Hospital	Nurse	2	No		No	Yes	Yes	No	Yes	Not worried	A little worried	A little worried	Not worried	Not applicable	Yes	Yes	Yes	Don’t know							A little hesitant	Disagree	Don’t Know	Disagree	Strongly Agree	Yes	Disagree	Disagree	Disagree	Disagree	Disagree	Disagree	Strongly Agree	Disagree				Disagree
1087	46	Female	Unmarried	Bachelor	Senior	Private	Shenzhen Wanfeng Hospital	Nurse	4	No	1-5	Yes	Yes	Yes	Yes	No	Not worried	Very worried	Very worried	Not worried	No	Yes	Yes	Yes	Yes	Never	Never	Never	A little worried	Not worried	Not worried	Somewhat hesitant	Strongly Agree	No	Strongly Agree	Strongly Agree	Yes	Strongly Agree	Agree	Agree	Agree	Agree	Strongly Agree	Strongly Agree	Strongly Disagree				Disagree
1098	42	Male	Unmarried	Diploma	Intermediate	Private	Shenzhen Wanfeng Hospital	Pharmacist	4	No	0	No	No	No	No	Yes	A little worried	Worried	Worried	Not worried	Yes	No	No	Yes	Don’t know							A little hesitant	Disagree	Yes	Disagree	Strongly Agree	Don’t Know	Disagree	Disagree	Strongly Disagree	Disagree	Disagree	Agree	Agree	Disagree				Disagree
1076	27	Female	Unmarried	Diploma	Primary	Private	Shenzhen Wanfeng Hospital	Nurse	2	No	1-5	No	Yes	No	No	No	Not worried	Not applicable	A little worried	Not worried	No	No	No	No	Yes	Never	Never	Never	Not worried	Not worried	Not worried	Not hesitant	Strongly Agree	No	Agree	Strongly Agree	No	Disagree	Disagree	Disagree	Strongly Disagree	Strongly Disagree	Agree	Strongly Disagree	Disagree				Disagree
1081	30	Male	Married	Diploma	Intermediate	Private	Shenzhen Wanfeng Hospital	Cleaning staff	1	No	0	Yes	No	No	No	No	Not worried	A little worried	A little worried	Not worried	Not applicable	Not applicable	Yes	No	Don’t know							Not hesitant	Disagree	No	Disagree	Disagree	Don’t Know	Disagree	Strongly Disagree	Disagree	Disagree	Disagree	Strongly Disagree	Disagree	Disagree				Disagree
1157	23	Female	Married	Diploma	Intermediate	Private	Shenzhen Wanfeng Hospital	Nurse	1	No	≥11	Yes	Yes	Yes	Yes	No	Not worried	A little worried	A little worried	Not worried	No	No	No	Yes	Yes	Never	Never	Never	Not worried	Not worried	Not worried	A little hesitant	Agree	Yes	Strongly Agree	Strongly Agree	Yes	Strongly Disagree	Strongly Disagree	Agree	Agree	Agree	Agree	Strongly Agree	Strongly Disagree				Strongly Disagree
1068	24	Female	Married	Diploma	None	Private	Shenzhen Wanfeng Hospital	Nurse	1	No	1-5	Yes	Yes	Yes	Yes	No	A little worried	Worried	Very worried	Not worried	No	Yes	Yes	Yes	Don’t know							Not hesitant	Agree	No	Disagree	Disagree	Don’t Know	Strongly Agree	Strongly Disagree	Strongly Disagree	Disagree	Strongly Disagree	Agree	Strongly Agree	Disagree				Disagree
1069	20	Female	Married	Diploma	None	Private	Shenzhen Wanfeng Hospital	Nurse	1	No	0	Yes	Yes	Yes	No	No	Not worried	A little worried	A little worried	Not worried	Yes	Yes	Yes	Yes	Don’t know							A little hesitant	Strongly Agree	Yes	Strongly Agree	Strongly Agree	Yes	Agree	Strongly Disagree	Disagree	Disagree	Disagree	Agree	Agree	Disagree				Disagree
1141	18	Female	Married	High school or others	Primary	Private	Shenzhen Wanfeng Hospital	Nurse	1	No	1-5	Yes	Yes	Yes	No	No	Worried	Very worried	Very worried	Not worried	No	No	Yes	Yes	Don’t know							Not hesitant	Strongly Agree	No	Strongly Agree	Strongly Agree	Yes	Disagree	Disagree	Disagree	Disagree	Disagree	Agree	Agree	Disagree				Disagree
1071	52	Female	Unmarried	Diploma	Senior	Private	Shenzhen Wanfeng Hospital	Obstetrician and Gynecologist	4	No	0	Yes	Yes	Yes	No	No	Worried	Not applicable	Not applicable	A little worried	Not applicable	Yes	Yes	Yes	No							Very hesitant	Agree	Don’t Know	Strongly Agree	Strongly Agree	Yes	Agree	Disagree	Disagree	Disagree	Disagree	Disagree	Agree	Agree	Agree	Disagree	Agree	Agree
1070	30	Female	Married	Bachelor	Primary	Private	Shenzhen Wanfeng Hospital	Pharmacist	2	No		Yes	No	No	No	No	Not applicable	Not applicable	Not applicable	Not worried	No	Yes	Yes	Yes	Yes	Once or twice	Never	Never	Not worried	Not worried	Not worried	A little hesitant	Disagree	Don’t Know	Strongly Agree	Strongly Agree	Yes	Agree	Disagree	Disagree	Disagree	Disagree	Agree	Agree	Disagree				Disagree
1074	55	Female	Unmarried	Diploma	Senior	Private	Shenzhen Wanfeng Hospital	Doctor	4	Yes		Yes	Yes	Yes	Yes	No	Not worried	Not worried	Not worried	Not worried	No	Yes	Yes	Yes	No							Not hesitant	Strongly Agree	Yes	Strongly Agree	Strongly Agree	Yes	Agree	Disagree	Disagree	Agree	Disagree	Disagree	Agree	Disagree				Disagree
1078	70	Female	Unmarried	Diploma	Intermediate	Private	Shenzhen Wanfeng Hospital	Doctor	4	No		Yes	Yes	Yes	Yes	No	A little worried	A little worried	A little worried	A little worried	No	Yes	Yes	Yes	Don’t know							A little hesitant	Strongly Agree	Yes	Strongly Agree	Strongly Agree	Yes	Disagree	Disagree	Disagree	Disagree	Strongly Disagree	Disagree	Agree	Disagree				Disagree
1072	27	Female	Married	Diploma	Intermediate	Private	Shenzhen Wanfeng Hospital	Nurse	1	Yes	6-10	Yes	Yes	Yes	Yes	No	Not worried	A little worried	Not worried	Not worried	Yes	Yes	Yes	Yes	Yes	Never	Never	Never	A little worried	A little worried	A little worried	A little hesitant	Strongly Agree	Yes	Strongly Agree	Strongly Agree	Yes	Strongly Agree	Strongly Agree	Strongly Agree	Disagree	Strongly Agree	Strongly Agree	Strongly Agree	Strongly Disagree				Strongly Disagree
1154	25	Female	Married	Bachelor	Primary	Private	Shenzhen Wanfeng Hospital	Obstetrician and Gynecologist	1	Yes	0	Yes	Yes	Yes	Yes	No	Not worried	Not worried	Not applicable	Not worried	No	Yes	Yes	Yes	Don’t know							Not hesitant	Agree	Yes	Strongly Agree	Strongly Agree	Yes	Disagree	Strongly Disagree	Disagree	Disagree	Disagree	Disagree	Disagree	Disagree				Disagree
1067	40	Male	Unmarried	Bachelor	Primary	Private	Shenzhen Wanfeng Hospital	Dentist	3	No		Yes	Yes	Yes	Yes	No	Not worried	Very worried	Very worried	Not worried	No	Yes	Yes	Yes	Don’t know							Not hesitant	Strongly Agree	Don’t Know	Strongly Agree	Strongly Agree	Don’t Know	Disagree	Disagree	Disagree	Disagree	Disagree	Agree	Agree	Disagree				Disagree
1075	62	Male	Unmarried	Bachelor	Senior	Private	Shenzhen Wanfeng Hospital	Dentist	4	No		No	No	No	No	Yes	Not worried	Not worried	Not worried	Not worried	Yes	Yes	Yes	Yes	No							Somewhat hesitant	Strongly Agree	Yes	Strongly Agree	Strongly Agree	Yes	Strongly Agree	Agree	Agree	Agree	Agree	Agree	Agree	Agree	Agree	Agree	Agree	Agree
1110	50	Female	Unmarried	High school or others	None	Private	Shenzhen Wanfeng Hospital	Cleaning staff	1	No		No	No	No	No	Yes	Not applicable	Not applicable	Not applicable	Not applicable	Not applicable	Not applicable	Not applicable	Not applicable	Don’t know							Very hesitant	Disagree	Don’t Know	Disagree	Disagree	Don’t Know	Strongly Disagree	Strongly Disagree	Strongly Disagree	Strongly Disagree	Strongly Disagree	Strongly Disagree	Strongly Disagree	Strongly Disagree				Strongly Disagree
1064	20	Female	Married	Diploma	Primary	Private	Shenzhen Wanfeng Hospital	Nurse	1	No	1-5	Yes	Yes	Yes	Yes	No	Not worried	Not worried	Not worried	Not worried	No	Yes	Yes	Yes	Yes	Never	Never	Never	Not worried	Not worried	Not worried	A little hesitant	Agree	Yes	Strongly Agree	Strongly Agree	Yes	Disagree	Agree	Disagree	Disagree	Disagree	Disagree	Disagree	Disagree				Disagree
1094	56	Female	Unmarried	Diploma	Intermediate	Private	Shenzhen Wanfeng Hospital	Nurse	4	No	0	No	Yes	No	No	No	Worried	Worried	Very worried	Worried	Yes	Yes	Yes	Yes	No							Somewhat hesitant	Agree	Yes	Strongly Agree	Strongly Agree	Yes	Disagree	Disagree	Disagree	Disagree	Disagree	Agree	Agree	Disagree				Disagree
1062	45	Male	Unmarried	Bachelor	Senior	Private	Shenzhen Wanfeng Hospital	Doctor	3	No	1-5	Yes	Yes	Yes	No	No	Not worried	Not worried	A little worried	Not worried	No	Yes	No	Yes	Yes	Once or twice	Never	Never	A little worried	Not worried	Not worried	A little hesitant	Strongly Agree	Don’t Know	Strongly Agree	Strongly Agree	Yes	Agree	Disagree	Disagree	Disagree	Disagree	Disagree	Agree	Disagree				Disagree
1063	27	Female	Unmarried	Diploma	Primary	Private	Shenzhen Wanfeng Hospital	Pharmacist	2	No		Yes	Yes	Yes	No	No	Not applicable	Not applicable	Not applicable	Not applicable	No	Yes	No	No	Yes	Never	Never	Never	Not worried	Not worried	Not worried	Not hesitant	Agree	No	Strongly Agree	Strongly Agree	Yes	Strongly Disagree	Strongly Disagree	Strongly Disagree	Strongly Agree	Disagree	Strongly Agree	Strongly Agree	Strongly Disagree				Strongly Disagree
1066	32	Male	Married	Diploma	Primary	Private	Shenzhen Wanfeng Hospital	Doctor	2	No	0	Yes	Yes	Yes	No	No	Very worried	Very worried	Very worried	Very worried	No	No	Yes	Yes	Yes	Several times	Once or twice	Never	A little worried	A little worried	A little worried	Somewhat hesitant	Strongly Agree	Yes	Strongly Agree	Strongly Agree	Yes	Agree	Disagree	Disagree	Agree	Agree	Agree	Strongly Agree	Strongly Agree	Agree	Disagree	Disagree	Strongly Agree
943	31	Female	Unmarried	Master or higher	Primary	Private	Shenzhen Wanfeng Hospital	Obstetrician and Gynecologist	2	No		Yes	Yes	Yes	Yes	No	Not worried	Not worried	Not worried	Not worried	No	No	No	No	Yes	Never	Never	Never	Not worried	Not worried	Not worried	Not hesitant	Strongly Agree	Yes	Strongly Agree	Strongly Agree	Yes	Disagree	Disagree	Disagree	Disagree	Disagree	Strongly Disagree	Disagree	Disagree				Disagree
1137	20	Female	Married	Bachelor	None	Private	Shenzhen Wanfeng Hospital	Nurse	1	No		No	No	No	No	Yes	Very worried	Very worried	Very worried	Very worried	Not applicable	Yes	Yes	Yes	Don’t know							Very hesitant	Agree	Yes	Disagree	Strongly Agree	Don’t Know	Disagree	Disagree	Strongly Disagree	Agree	Disagree	Disagree	Agree	Disagree				Strongly Disagree
843	26	Female	Married	Bachelor	Primary	Governmental	Shenzhen Hospital affiliated to Southern Medical University	Nurse	1	Yes	1-5	No	Yes	No	No	No	A little worried	Worried	A little worried	A little worried	Yes	No	Yes	Not applicable	No							A little hesitant	Disagree	Yes	Disagree	Disagree	Don’t Know	Disagree	Disagree	Disagree	Disagree	Disagree	Disagree	Agree	Disagree				Disagree
1013	32	Female	Unmarried	Bachelor	Intermediate	Governmental	Shenzhen Hospital affiliated to Southern Medical University	Nurse	2	No		No	Yes	Yes	No	No	A little worried	A little worried	Worried	Not worried	Yes	No	Yes	Yes	Yes	Never	Never	Never	Not worried	Not worried	Not worried	Somewhat hesitant	Agree	Yes	Strongly Agree	Strongly Agree	Don’t Know	Agree	Disagree	Strongly Disagree	Strongly Disagree	Strongly Disagree	Agree	Disagree	Strongly Disagree				Strongly Disagree
1036	30	Female	Unmarried	Bachelor	Primary	Governmental	Shenzhen Hospital affiliated to Southern Medical University	Nurse	2	Yes		Yes	Yes	Yes	No	No	Not worried	Worried	Worried	Not worried	Yes	No	No	Yes	Yes	Never	Never	Never	Not worried	Not worried	Not worried	Not hesitant	Disagree	No	Strongly Agree	Strongly Agree	Yes	Disagree	Disagree	Agree	Agree	Disagree	Disagree	Strongly Agree	Disagree				Disagree
1289	45	Female	Unmarried	Bachelor	Senior	Governmental	Shenzhen Hospital affiliated to Southern Medical University	Medical /Laboratory Technician	4	No		Yes	Yes	Yes	Yes	No	Not worried	Not applicable	Not applicable	Not worried	No	No	Yes	No	Yes	Never	Never	Never	Not worried	Not worried	Not worried	Not hesitant	Strongly Agree	Don’t Know	Strongly Agree	Strongly Agree	Yes	Disagree	Disagree	Disagree	Disagree	Disagree	Agree	Agree	Disagree				Disagree
1009	24	Female	Married	Diploma	Primary	Governmental	Shenzhen Hospital affiliated to Southern Medical University	Receptionist	1	No	≥11	Yes	Yes	Yes	Yes	No	A little worried	Worried	Very worried	Not worried	No	No	Yes	No	Yes	Never	Never	Never	Worried	A little worried	A little worried	A little hesitant	Agree	Yes	Strongly Agree	Strongly Agree	Yes	Disagree	Agree	Disagree	Disagree	Disagree	Agree	Agree	Agree	Disagree	Agree	Disagree	Disagree
800	30	Male	Unmarried	Master or higher	Intermediate	Governmental	Shenzhen Hospital affiliated to Southern Medical University	Pharmacist	1	No	0	No	Yes	No	No	No	Not applicable	Not applicable	Not applicable	Not applicable	Not applicable	Not applicable	Not applicable	Not applicable	Yes	Never	Never	Once or twice	Not worried	Not worried	Not worried	A little hesitant	Disagree	Don’t Know	Strongly Agree	Disagree	Don’t Know	Disagree	Disagree	Disagree	Disagree	Disagree	Agree	Agree	Agree	Disagree	Agree	Disagree	Disagree
933	35	Male	Unmarried	Bachelor	Intermediate	Governmental	Shenzhen Hospital affiliated to Southern Medical University	Nurse	3	No	1-5	Yes	Yes	Yes	Yes	No	Not worried	Very worried	Very worried	Not worried	No	No	Yes	No	Yes	Never	Never	Never	Not worried	Not worried	Not worried	A little hesitant	Disagree	Yes	Strongly Agree	Strongly Agree	Yes	Agree	Disagree	Agree	Agree	Disagree	Disagree	Agree	Disagree				Disagree
1057	49	Male	Unmarried	Master or higher	Senior	Governmental	Shenzhen Hospital affiliated to Southern Medical University	Doctor	4	No	0	No	Yes	Yes	No	No	Not worried	Not worried	Not worried	Not worried	No	No	No	No	Yes	Never	Never	Never	Not worried	Not worried	Not worried	A little hesitant	Disagree	Yes	Strongly Agree	Strongly Agree	Don’t Know	Agree	Disagree	Agree	Agree	Disagree	Agree	Agree	Agree	Disagree	Disagree	Agree	Disagree
892	30	Female	Unmarried	Bachelor	Primary	Governmental	Shenzhen Hospital affiliated to Southern Medical University	Nurse	2	No		No	Yes	Yes	No	No	Not worried	A little worried	A little worried	Not worried	No	No	Yes	Yes	No							A little hesitant	Agree	Don’t Know	Strongly Agree	Strongly Agree	Don’t Know	Agree	Disagree	Strongly Disagree	Strongly Disagree	Strongly Disagree	Disagree	Agree	Agree	Disagree	Agree	Disagree	Disagree
999	38	Male	Unmarried	Master or higher	Intermediate	Governmental	Shenzhen Hospital affiliated to Southern Medical University	Doctor	3	Yes		No	Yes	No	No	No	Not worried	Not applicable	Not applicable	Not applicable	Yes	No	Yes	No	Don’t know							A little hesitant	Disagree	Don’t Know	Strongly Agree	Strongly Agree	Don’t Know	Disagree	Strongly Disagree	Disagree	Disagree	Strongly Disagree	Agree	Strongly Agree	Disagree				Disagree
1131	27	Female	Married	Bachelor	Primary	Governmental	Shenzhen Hospital affiliated to Southern Medical University	Nurse	1	Yes	≥11	Yes	Yes	Yes	Yes	No	Not worried	Not worried	Not worried	Not worried	No	No	No	No	No							Not hesitant	Agree	No	Agree	Agree	No	Strongly Agree	Strongly Disagree	Strongly Agree	Strongly Disagree	Strongly Disagree	Strongly Disagree	Strongly Disagree	Strongly Agree	Disagree	Agree	Disagree	Disagree
938	33	Male	Divorced	Bachelor	Intermediate	Governmental	Shenzhen Hospital affiliated to Southern Medical University	Medical /Laboratory Technician	2	No	0	No	Yes	No	No	No	Not applicable	Not applicable	Not applicable	Not worried	Not applicable	No	Yes	No	Don’t know							Not hesitant	Strongly Agree	Don’t Know	Strongly Agree	Strongly Agree	Yes	Agree	Disagree	Strongly Disagree	Disagree	Disagree	Agree	Agree	Disagree				Disagree
1186	26	Female	Married	Diploma	Primary	Governmental	Shenzhen Hospital affiliated to Southern Medical University	Nurse	1	No	1-5	No	Yes	Yes	No	No	A little worried	Very worried	Worried	Not worried	No	Yes	No	Yes	Yes	Once or twice	Never	Never	Not worried	Not worried	Not worried	A little hesitant	Agree	Yes	Strongly Agree	Strongly Agree	No	Strongly Agree	Disagree	Disagree	Disagree	Disagree	Agree	Strongly Agree	Agree	Agree	Agree	Agree	Agree
1213	23	Female	Married	Bachelor	Primary	Governmental	Shenzhen Hospital affiliated to Southern Medical University	Nurse	1	No	0	No	Yes	Yes	No	No	Not applicable	Very worried	Very worried	A little worried	No	Yes	Yes	Yes	Yes	Never	Never	Never	A little worried	A little worried	A little worried	A little hesitant	Agree	Yes	Strongly Agree	Strongly Agree	No	Disagree	Disagree	Agree	Agree	Disagree	Agree	Agree	Disagree				Disagree
1172	47	Female	Unmarried	Master or higher	Senior	Governmental	Shenzhen Hospital affiliated to Southern Medical University	Nurse	4	No	1-5	No	Yes	Yes	No	No	A little worried	Worried	Very worried	Not worried	No	Yes	No	Yes	Yes	Never	Never	Never	Not worried	Not worried	Not worried	A little hesitant	Strongly Agree	Yes	Strongly Agree	Strongly Agree	Yes	Disagree	Disagree	Disagree	Disagree	Disagree	Disagree	Agree	Disagree				Disagree
935	29	Female	Unmarried	Bachelor	Primary	Governmental	Shenzhen Hospital affiliated to Southern Medical University	Medical /Laboratory Technician	2	Yes	0	Yes	Yes	Yes	Yes	No	Not worried	A little worried	A little worried	Not worried	No	No	Yes	Yes	No							A little hesitant	Strongly Agree	Yes	Strongly Agree	Strongly Agree	Yes	Disagree	Disagree	Disagree	Disagree	Strongly Disagree	Strongly Disagree	Agree	Strongly Disagree				Strongly Disagree
937	29	Male	Unmarried	Bachelor	None	Governmental	Shenzhen Hospital affiliated to Southern Medical University	Public health care physician	2	Yes	1-5	Yes	Yes	Yes	No	No	Not applicable	Not applicable	Not applicable	Not applicable	No	Not applicable	Not applicable	Not applicable	Yes	Never	Never	Never	A little worried	Not worried	Not worried	A little hesitant	Strongly Agree	Yes	Strongly Agree	Strongly Agree	Don’t Know	Disagree	Disagree	Disagree	Disagree	Disagree	Disagree	Disagree	Disagree				Agree
1091	23	Female	Married	High school or others	None	Governmental	Shenzhen Hospital affiliated to Southern Medical University	Receptionist	1	No		No	Yes	Yes	Yes	No	Not worried	A little worried	A little worried	Not worried	No	Not applicable	Not applicable	Not applicable	No							A little hesitant	Disagree	No	Strongly Agree	Disagree	Don’t Know	Disagree	Strongly Disagree	Strongly Disagree	Strongly Disagree	Disagree	Agree	Disagree	Disagree				Disagree
922	27	Female	Married	Diploma	Primary	Governmental	Shenzhen Hospital affiliated to Southern Medical University	Medical /Laboratory Technician	1	No	0	No	Yes	Yes	No	No	Not applicable	Not applicable	Not applicable	Not applicable	Not applicable	Not applicable	Not applicable	Not applicable	Don’t know							Somewhat hesitant	Disagree	Don’t Know	Strongly Agree	Strongly Agree	Don’t Know	Disagree	Disagree	Disagree	Disagree	Disagree	Disagree	Agree	Strongly Disagree				Strongly Disagree
1051	30	Female	Unmarried	Bachelor	Primary	Governmental	Shenzhen Hospital affiliated to Southern Medical University	Nurse	2	No	1-5	Yes	Yes	Yes	Yes	No	A little worried	Very worried	Worried	Not worried	No	Yes	No	Yes	Yes	Once or twice	Never	Never	A little worried	Not worried	Not worried	Somewhat hesitant	Agree	Yes	Strongly Agree	Strongly Agree	Yes	Disagree	Disagree	Agree	Agree	Disagree	Agree	Strongly Agree	Disagree				Disagree
1144	32	Male	Married	Bachelor	Primary	Governmental	Shenzhen Hospital affiliated to Southern Medical University	Nurse	2	No		No	Yes	Yes	No	No	Not worried	Very worried	Worried	Not worried	No	No	No	Yes	Yes	Never	Once or twice	Once or twice	Not worried	Not worried	Not worried	A little hesitant	Strongly Agree	Yes	Strongly Agree	Strongly Agree	Don’t Know	Disagree	Disagree	Disagree	Disagree	Disagree	Disagree	Agree	Disagree				Disagree
1171	44	Female	Unmarried	Master or higher	Senior	Governmental	Shenzhen Hospital affiliated to Southern Medical University	Doctor	4	No		No	Yes	No	No	No	A little worried	Very worried	A little worried	Not worried	Yes	No	Not applicable	Yes	Don’t know							Somewhat hesitant	Strongly Agree	Don’t Know	Strongly Agree	Strongly Agree	Don’t Know	Agree	Agree	Agree	Agree	Disagree	Agree	Agree	Agree	Agree	Agree	Disagree	Disagree
1173	26	Female	Unmarried	Bachelor	Primary	Governmental	Shenzhen Hospital affiliated to Southern Medical University	Nurse	1	No	6-10	Yes	Yes	Yes	Yes	No	Not worried	Not applicable	A little worried	Not worried	No	Yes	Yes	Yes	Don’t know							Not hesitant	Agree	Yes	Strongly Agree	Disagree	Yes	Agree	Strongly Agree	Strongly Agree	Agree	Disagree	Agree	Agree	Strongly Agree	Agree	Agree	Agree	Disagree
1288	36	Male	Unmarried	Bachelor	Intermediate	Governmental	Shenzhen Hospital affiliated to Southern Medical University	Doctor	3	No	0	No	Yes	No	No	No	Not worried	Worried	Worried	Not worried	No	No	Yes	Yes	Don’t know							Very hesitant	Strongly Agree	Don’t Know	Disagree	Disagree	Don’t Know	Disagree	Strongly Disagree	Disagree	Strongly Disagree	Disagree	Strongly Agree	Strongly Agree	Disagree				Disagree
878	30	Female	Unmarried	Bachelor	Primary	Governmental	Shenzhen Hospital affiliated to Southern Medical University	Nurse	3	No		No	No	No	No	Yes	Worried	Worried	Worried	Worried	No	Yes	Yes	Yes	Don’t know							Somewhat hesitant	Agree	Don’t Know	Strongly Agree	Strongly Agree	No	Disagree	Agree	Disagree	Disagree	Disagree	Agree	Agree	Disagree				Disagree
1041	27	Female	Married	Bachelor	Primary	Governmental	Shenzhen Hospital affiliated to Southern Medical University	Nurse	1	No	1-5	No	Yes	Yes	No	No	Worried	A little worried	Worried	A little worried	No	No	Yes	Yes	Yes	Never	Never	Never	Not worried	Not worried	Not worried	Not hesitant	Strongly Agree	Yes	Strongly Agree	Strongly Agree	Yes	Disagree	Strongly Disagree	Strongly Disagree	Strongly Disagree	Strongly Disagree	Strongly Disagree	Strongly Disagree	Strongly Agree	Disagree	Agree	Disagree	Strongly Disagree
1204	30	Female	Unmarried	Bachelor	Primary	Governmental	Shenzhen Hospital affiliated to Southern Medical University	Nurse	2	No		No	Yes	Yes	Yes	No	Not worried	Very worried	Very worried	A little worried	No	Yes	Yes	Yes	Yes	Never	Never	Never	Not worried	Not worried	Not worried	Somewhat hesitant	Strongly Agree	Don’t Know	Strongly Agree	Strongly Agree	Yes	Agree	Agree	Disagree	Disagree	Disagree	Agree	Disagree	Agree	Agree	Disagree	Agree	Agree
1200	25	Female	Married	Bachelor	Primary	Governmental	Shenzhen Hospital affiliated to Southern Medical University	Obstetrician and Gynecologist	1	No		Yes	Yes	Yes	No	No	A little worried	Very worried	Very worried	Not worried	No	No	No	No	Yes	Never	Never	Never	Not worried	Not worried	Not worried	Not hesitant	Strongly Agree	Yes	Strongly Agree	Strongly Agree	Yes	Strongly Disagree	Strongly Disagree	Strongly Disagree	Disagree	Strongly Disagree	Disagree	Strongly Disagree	Strongly Disagree				Strongly Disagree
1164	42	Male	Unmarried	Master or higher	Senior	Governmental	Shenzhen Hospital affiliated to Southern Medical University	Doctor	4	Yes		Yes	Yes	Yes	Yes	No	Not worried	Not worried	Not applicable	Not applicable	No	No	No	No	Yes	Once or twice	Never	Never	Not worried	Not worried	Not worried	Not hesitant	Strongly Agree	No	Strongly Agree	Strongly Agree	Yes	Disagree	Disagree	Agree	Strongly Disagree	Strongly Disagree	Strongly Disagree	Agree	Disagree				Disagree
1285	65	Female	Unmarried	Bachelor	Senior	Governmental	Shenzhen Hospital affiliated to Southern Medical University	Public health care physician	4	No	0	No	Yes	No	No	No	Not applicable	Not applicable	Not applicable	Not applicable	No	Yes	Yes	Yes	No							Very hesitant	Strongly Agree	Yes	Strongly Agree	Strongly Agree	Yes	Agree	Disagree	Disagree	Disagree	Disagree	Disagree	Disagree	Strongly Agree	Disagree	Disagree	Agree	Strongly Agree
1143	34	Female	Unmarried	Master or higher	Intermediate	Governmental	Shenzhen Hospital affiliated to Southern Medical University	Medical /Laboratory Technician	3	Yes	6-10	Yes	Yes	Yes	Yes	No	Not worried	Not worried	Not worried	Not worried	No	No	Yes	No	Yes	Never	Never	Never	Not worried	Not worried	Not worried	Not hesitant	Strongly Agree	Yes	Strongly Agree	Strongly Agree	Yes	Disagree	Strongly Disagree	Strongly Disagree	Strongly Disagree	Strongly Disagree	Disagree	Strongly Disagree	Strongly Disagree				Strongly Disagree
1245	47	Female	Unmarried	High school or others	None	Governmental	Shenzhen Hospital affiliated to Southern Medical University	Cleaning staff	1	No	0	Yes	Yes	Yes	Yes	No	Not applicable	Not applicable	Not applicable	Not applicable	Not applicable	Not applicable	Not applicable	Not applicable	Don’t know							Not hesitant	Disagree	Don’t Know	Disagree	Disagree	Don’t Know	Strongly Disagree	Strongly Disagree	Strongly Disagree	Strongly Disagree	Strongly Disagree	Strongly Disagree	Strongly Disagree	Strongly Disagree				Strongly Disagree
1250	51	Male	Unmarried	High school or others	None	Governmental	Shenzhen Hospital affiliated to Southern Medical University	Cleaning staff	1	No		Yes	Yes	Yes	Yes	Yes	Not applicable	Not applicable	Not applicable	Not applicable	Not applicable	Not applicable	Not applicable	Not applicable	No							Not hesitant	Disagree	Don’t Know	Disagree	Disagree	Don’t Know	Strongly Disagree	Strongly Disagree	Strongly Disagree	Strongly Disagree	Strongly Disagree	Strongly Disagree	Strongly Disagree	Strongly Disagree				Strongly Disagree
1258	54	Male	Unmarried	High school or others	None	Governmental	Shenzhen Hospital affiliated to Southern Medical University	Cleaning staff	1	No		Yes	Yes	Yes	Yes	No	Not applicable	Not applicable	Not applicable	Not applicable	Not applicable	Not applicable	Not applicable	Not applicable	No							Not hesitant	Disagree	Don’t Know	Disagree	Disagree	Don’t Know	Strongly Disagree	Strongly Disagree	Strongly Disagree	Strongly Disagree	Strongly Disagree	Strongly Disagree	Strongly Disagree	Strongly Disagree				Strongly Disagree
1020	34	Female	Married	Bachelor	Intermediate	Governmental	Shenzhen Hospital affiliated to Southern Medical University	Medical /Laboratory Technician	2	No	1-5	Yes	Yes	Yes	Yes	No	A little worried	A little worried	A little worried	Not worried	No	Yes	Yes	Yes	Yes	Never	Never	Never	Not worried	Not worried	Not worried	Not hesitant	Strongly Agree	Yes	Strongly Agree	Strongly Agree	Yes	Disagree	Disagree	Disagree	Disagree	Disagree	Agree	Agree	Disagree				Disagree
1283	45	Male	Unmarried	Bachelor	Senior	Governmental	Shenzhen Hospital affiliated to Southern Medical University	Medical /Laboratory Technician	3	Yes		Yes	Yes	Yes	No	No	Not worried	Not worried	A little worried	Not worried	No	No	No	Yes	Yes	Once or twice	Once or twice	Once or twice	Not worried	Not worried	Not worried	Not hesitant	Strongly Agree	Yes	Strongly Agree	Strongly Agree	Yes	Agree	Disagree	Disagree	Disagree	Disagree	Disagree	Agree	Disagree				Disagree
1244	64	Male	Unmarried	High school or others	None	Governmental	Shenzhen Hospital affiliated to Southern Medical University	Cleaning staff	1	No	0	Yes	Yes	Yes	Yes	No	Not applicable	Not applicable	Not applicable	Not applicable	Not applicable	Not applicable	Not applicable	Not applicable	Don’t know							A little hesitant	Strongly Agree	No	Strongly Agree	Strongly Agree	No	Strongly Agree	Agree	Agree	Agree	Disagree	Disagree	Strongly Agree	Disagree				Strongly Disagree
924	34	Male	Unmarried	Bachelor	Intermediate	Governmental	Shenzhen Hospital affiliated to Southern Medical University	Doctor	2	No	1-5	Yes	Yes	Yes	No	No	Not worried	A little worried	A little worried	Not worried	No	Yes	Yes	Yes	Yes	Never	Never	Never	Not worried	Not worried	Not worried	A little hesitant	Agree	Yes	Strongly Agree	Strongly Agree	Yes	Agree	Disagree	Agree	Disagree	Disagree	Agree	Strongly Agree	Disagree				Agree
1010	39	Female	Unmarried	Master or higher	Intermediate	Governmental	Shenzhen Hospital affiliated to Southern Medical University	Dentist	3	No		Yes	Yes	Yes	Yes	No	Not worried	A little worried	Very worried	Not worried	No	No	Yes	No	Yes	Never	Never	Never	A little worried	A little worried	A little worried	A little hesitant	Strongly Agree	Yes	Strongly Agree	Strongly Agree	Yes	Disagree	Strongly Agree	Disagree	Disagree	Disagree	Disagree	Disagree	Agree	Disagree	Disagree	Agree	Agree
870	26	Female	Married	Master or higher	Primary	Governmental	Shenzhen Hospital affiliated to Southern Medical University	Doctor	1	No		No	Yes	No	No	No	Not worried	A little worried	A little worried	Not worried	No	No	Yes	Yes	Yes	Once or twice	Never	Never	Not worried	Not worried	Not worried	A little hesitant	Agree	Don’t Know	Disagree	Disagree	Don’t Know	Disagree	Disagree	Disagree	Disagree	Disagree	Disagree	Agree	Agree	Disagree	Agree	Disagree	Agree
1178	28	Female	Married	Bachelor	Primary	Governmental	Shenzhen Hospital affiliated to Southern Medical University	Nurse	2	No		No	Yes	Yes	No	No	Not worried	A little worried	A little worried	Not worried	No	No	No	Yes	Don’t know							Somewhat hesitant	Agree	No	Strongly Agree	Strongly Agree	Don’t Know	Agree	Agree	Disagree	Agree	Disagree	Agree	Strongly Disagree	Strongly Agree	Agree	Agree	Disagree	Disagree
1256	47	Female	Unmarried	High school or others	None	Governmental	Shenzhen Hospital affiliated to Southern Medical University	Cleaning staff	1	No	0	Yes	Yes	Yes	Yes	No	Not applicable	Not applicable	Not applicable	Not applicable	Not applicable	Not applicable	Not applicable	Not applicable	Don’t know							Not hesitant	Disagree	Don’t Know	Disagree	Disagree	Don’t Know	Strongly Disagree	Strongly Disagree	Strongly Disagree	Strongly Disagree	Strongly Disagree	Strongly Disagree	Strongly Disagree	Strongly Disagree				Strongly Disagree
1249	60	Male	Unmarried	High school or others	None	Governmental	Shenzhen Hospital affiliated to Southern Medical University	Cleaning staff	1	No		Yes	Yes	Yes	Yes	Yes	Not applicable	Not applicable	Not applicable	Not applicable	Not applicable	Not applicable	Not applicable	Not applicable	Don’t know							Not hesitant	Disagree	Don’t Know	Disagree	Disagree	Don’t Know	Strongly Disagree	Strongly Disagree	Strongly Disagree	Strongly Disagree	Strongly Disagree	Strongly Disagree	Strongly Disagree	Strongly Disagree				Strongly Disagree
1202	34	Male	Unmarried	Master or higher	Primary	Governmental	Shenzhen Hospital affiliated to Southern Medical University	Doctor	2	No	1-5	No	Yes	No	No	No	Not worried	A little worried	Worried	Not worried	No	No	No	No	Yes	Several times	Once or twice	Several times	Not worried	Not worried	Not worried	Not hesitant	Agree	Don’t Know	Agree	Strongly Agree	Don’t Know	Agree	Agree	Disagree	Disagree	Disagree	Disagree	Disagree	Agree	Disagree	Disagree	Agree	Disagree
1280	29	Male	Unmarried	Master or higher	Primary	Governmental	Shenzhen Hospital affiliated to Southern Medical University	Doctor	1	No	0	Yes	Yes	Yes	No	No	Not worried	A little worried	Not applicable	Not worried	No	Yes	Yes	Not applicable	Don’t know							A little hesitant	Disagree	Don’t Know	Strongly Agree	Strongly Agree	Don’t Know	Disagree	Disagree	Disagree	Disagree	Disagree	Disagree	Strongly Agree	Disagree				Disagree
1251	61	Male	Unmarried	High school or others	None	Governmental	Shenzhen Hospital affiliated to Southern Medical University	Cleaning staff	1	No		Yes	Yes	Yes	Yes	No	Not applicable	Not applicable	Not applicable	Not applicable	Not applicable	Not applicable	Not applicable	Not applicable	Don’t know							Not hesitant	Disagree	Don’t Know	Disagree	Disagree	Don’t Know	Strongly Disagree	Strongly Disagree	Strongly Disagree	Strongly Disagree	Strongly Disagree	Strongly Disagree	Strongly Disagree	Strongly Disagree				Strongly Disagree
918	22	Female	Married	Diploma	Primary	Governmental	Shenzhen Hospital affiliated to Southern Medical University	Nurse	1	No	1-5	Yes	Yes	Yes	Yes	No	A little worried	Very worried	Very worried	A little worried	Yes	Yes	Yes	No	Yes	Never	Never	Never	A little worried	Not worried	Not worried	A little hesitant	Agree	Don’t Know	Strongly Agree	Strongly Agree	Yes	Disagree	Disagree	Disagree	Disagree	Disagree	Agree	Strongly Agree	Disagree				Disagree
1162	19	Female	Married	Diploma	None	Governmental	Shenzhen Hospital affiliated to Southern Medical University	Dentist	1	No	0	No	Yes	No	No	Yes	Not worried	Very worried	Very worried	Not worried	No	Yes	No	Yes	Don’t know							Very hesitant	Disagree	Don’t Know	Disagree	Disagree	Don’t Know	Strongly Disagree	Strongly Disagree	Agree	Agree	Agree	Agree	Strongly Agree	Disagree				Disagree
1243	50	Female	Unmarried	High school or others	None	Governmental	Shenzhen Hospital affiliated to Southern Medical University	Cleaning staff	1	No		No	No	No	No	Yes	Not applicable	Not applicable	Not applicable	Not applicable	Not applicable	Not applicable	Not applicable	Not applicable	Don’t know							Not hesitant	Disagree	Don’t Know	Disagree	Disagree	Don’t Know	Strongly Disagree	Strongly Disagree	Strongly Disagree	Strongly Disagree	Strongly Disagree	Strongly Disagree	Strongly Disagree	Strongly Disagree				Strongly Disagree
1262	49	Female	Unmarried	High school or others	None	Governmental	Shenzhen Hospital affiliated to Southern Medical University	Cleaning staff	1	No		Yes	Yes	Yes	Yes	No	Not applicable	Not applicable	Not applicable	Not applicable	Not applicable	Not applicable	Not applicable	Not applicable	No							Not hesitant	Disagree	Don’t Know	Disagree	Disagree	Don’t Know	Strongly Disagree	Strongly Disagree	Strongly Disagree	Strongly Disagree	Strongly Disagree	Strongly Disagree	Strongly Disagree	Strongly Disagree				Strongly Disagree
996	29	Female	Unmarried	Master or higher	Primary	Governmental	Shenzhen Hospital affiliated to Southern Medical University	Doctor	1	No		No	Yes	Yes	No	No	Very worried	Very worried	Very worried	Not worried	Not applicable	Not applicable	Not applicable	Not applicable	Don’t know							Somewhat hesitant	Strongly Agree	Yes	Strongly Agree	Strongly Agree	No	Agree	Disagree	Strongly Agree	Agree	Agree	Disagree	Agree	Strongly Agree	Agree	Agree	Agree	Strongly Agree
1237	29	Female	Unmarried	Bachelor	Primary	Governmental	Shenzhen Hospital affiliated to Southern Medical University	Nurse	2	No	1-5	No	No	No	No	Yes	A little worried	Very worried	Very worried	Not worried	Yes	Yes	Yes	Yes	Yes	Never	Never	Once or twice	Not worried	A little worried	Not worried	Very hesitant	Strongly Agree	Don’t Know	Disagree	Disagree	Don’t Know	Strongly Agree	Agree	Agree	Disagree	Strongly Disagree	Strongly Agree	Strongly Agree	Disagree				Agree
1246	42	Male	Unmarried	High school or others	None	Governmental	Shenzhen Hospital affiliated to Southern Medical University	Cashier	1	No	0	Yes	Yes	Yes	Yes	No	Not applicable	Not applicable	Not applicable	Not applicable	Not applicable	Not applicable	Not applicable	Not applicable	Don’t know							Very hesitant	Disagree	Don’t Know	Disagree	Disagree	Don’t Know	Strongly Agree	Strongly Agree	Strongly Agree	Strongly Agree	Strongly Agree	Strongly Agree	Strongly Agree	Disagree				Strongly Disagree
1139	23	Female	Married	Master or higher	None	Governmental	Shenzhen Hospital affiliated to Southern Medical University	Medical /Laboratory Technician	1	No	1-5	Yes	Yes	Yes	Yes	No	Worried	Worried	Worried	Worried	Yes	Yes	Yes	Yes	No							Not hesitant	Disagree	Yes	Strongly Agree	Strongly Agree	Yes	Agree	Disagree	Disagree	Disagree	Disagree	Agree	Agree	Disagree				Disagree
950	23	Female	Married	Bachelor	Primary	Governmental	Shenzhen Hospital affiliated to Southern Medical University	Nurse	1	No	0	Yes	Yes	Yes	Yes	No	Worried	Very worried	Very worried	Very worried	No	Yes	No	Yes	Don’t know							A little hesitant	Disagree	Don’t Know	Disagree	Disagree	Don’t Know	Disagree	Disagree	Strongly Disagree	Disagree	Disagree	Agree	Agree	Disagree				Strongly Disagree
1239	50	Male	Unmarried	High school or others	None	Governmental	Shenzhen Hospital affiliated to Southern Medical University	Cleaning staff	1	No		Yes	Yes	Yes	Yes	No	Not applicable	Not applicable	Not applicable	Not applicable	Not applicable	Not applicable	Not applicable	Not applicable	Don’t know							Somewhat hesitant	Disagree	Don’t Know	Disagree	Disagree	Don’t Know	Strongly Agree	Strongly Agree	Strongly Agree	Strongly Agree	Strongly Agree	Strongly Agree	Strongly Agree	Disagree				Strongly Disagree
1182	38	Male	Unmarried	Master or higher	Senior	Governmental	Shenzhen Hospital affiliated to Southern Medical University	Dentist	3	Yes	≥11	Yes	Yes	Yes	Yes	No	Not worried	A little worried	A little worried	Not worried	No	Yes	Yes	Yes	Yes	Once or twice	Never	Never	Not worried	Not worried	Not worried	Not hesitant	Strongly Agree	Yes	Strongly Agree	Strongly Agree	Yes	Disagree	Disagree	Disagree	Disagree	Disagree	Agree	Agree	Disagree				Disagree
803	27	Female	Married	Bachelor	Primary	Governmental	Shenzhen Hospital affiliated to Southern Medical University	Nurse	2	No	1-5	Yes	Yes	Yes	No	No	Not worried	Very worried	Very worried	Not worried	No	Yes	Yes	Yes	No							Not hesitant	Disagree	Yes	Strongly Agree	Strongly Agree	Yes	Disagree	Disagree	Disagree	Strongly Disagree	Strongly Disagree	Strongly Disagree	Disagree	Strongly Disagree				Strongly Disagree
1247	26	Male	Unmarried	High school or others	None	Governmental	Shenzhen Hospital affiliated to Southern Medical University	Cleaning staff	1	No	0	Yes	Yes	Yes	Yes	Yes	Not applicable	Not applicable	Not applicable	Not applicable	Not applicable	Not applicable	Not applicable	Not applicable	Don’t know							Not hesitant	Disagree	Don’t Know	Disagree	Disagree	Don’t Know	Strongly Disagree	Strongly Disagree	Strongly Disagree	Strongly Disagree	Strongly Disagree	Strongly Disagree	Strongly Disagree	Strongly Disagree				Strongly Disagree
1260	42	Male	Unmarried	High school or others	None	Governmental	Shenzhen Hospital affiliated to Southern Medical University	Cashier	1	No		Yes	Yes	Yes	Yes	No	Not applicable	Not applicable	Not applicable	Not applicable	Not applicable	Not applicable	Not applicable	Not applicable	Don’t know							Very hesitant	Disagree	Don’t Know	Disagree	Disagree	Don’t Know	Strongly Agree	Strongly Agree	Strongly Agree	Strongly Agree	Strongly Agree	Strongly Agree	Strongly Agree	Disagree				Strongly Disagree
1257	92	Male	Unmarried	High school or others	None	Governmental	Shenzhen Hospital affiliated to Southern Medical University	Cleaning staff	1	No		Yes	Yes	Yes	Yes	No	Not applicable	Not applicable	Not applicable	Not applicable	Not applicable	Not applicable	Not applicable	Not applicable	Don’t know							Somewhat hesitant	Disagree	Don’t Know	Disagree	Disagree	Don’t Know	Agree	Disagree	Strongly Disagree	Strongly Agree	Disagree	Disagree	Disagree	Disagree				Strongly Disagree
899	24	Female	Married	Bachelor	Primary	Governmental	Shenzhen Hospital affiliated to Southern Medical University	Nurse	1	No	1-5	No	Yes	Yes	Yes	No	Not worried	Not worried	Not worried	Not worried	No	Yes	No	No	Yes	Never	Never	Never	Not worried	Not worried	Not worried	Not hesitant	Disagree	Yes	Strongly Agree	Strongly Agree	Don’t Know	Disagree	Disagree	Disagree	Disagree	Disagree	Agree	Disagree	Disagree				Disagree
991	29	Female	Unmarried	Master or higher	Primary	Governmental	Shenzhen Hospital affiliated to Southern Medical University	Obstetrician and Gynecologist	1	No		Yes	Yes	Yes	No	No	Not worried	A little worried	A little worried	Not worried	No	No	No	Yes	Don’t know							A little hesitant	Disagree	Yes	Strongly Agree	Strongly Agree	Yes	Disagree	Disagree	Disagree	Disagree	Disagree	Agree	Agree	Disagree				Disagree
821	24	Female	Married	Bachelor	Primary	Governmental	Shenzhen Hospital affiliated to Southern Medical University	Nurse	1	No		No	Yes	Yes	No	No	Not worried	Worried	Worried	Not worried	Yes	Yes	Yes	Yes	Don’t know							Somewhat hesitant	Strongly Agree	Don’t Know	Strongly Agree	Strongly Agree	Yes	Disagree	Disagree	Strongly Disagree	Disagree	Agree	Agree	Agree	Agree	Agree	Disagree	Disagree	Agree
788	37	Male	Unmarried	Master or higher	Intermediate	Governmental	Shenzhen Hospital affiliated to Southern Medical University	Doctor	1	No		No	Yes	Yes	Yes	Yes	Not worried	A little worried	A little worried	Not worried	No	No	Yes	Yes	No							A little hesitant	Agree	Don’t Know	Strongly Agree	Strongly Agree	Don’t Know	Disagree	Agree	Agree	Agree	Agree	Agree	Agree	Disagree				Disagree
1136	30	Male	Unmarried	Master or higher	Intermediate	Governmental	Shenzhen Hospital affiliated to Southern Medical University	Pharmacist	1	No	0	Yes	Yes	Yes	No	No	Not applicable	Not applicable	Not applicable	Not worried	Not applicable	Not applicable	Not applicable	Not applicable	Don’t know							A little hesitant	Disagree	Yes	Disagree	Disagree	Don’t Know	Disagree	Strongly Disagree	Strongly Disagree	Disagree	Disagree	Disagree	Agree	Disagree				Disagree
908	23	Female	Married	Diploma	None	Governmental	Shenzhen Hospital affiliated to Southern Medical University	Pharmacist	1	No		No	Yes	No	No	No	Not applicable	Not applicable	Not applicable	Not applicable	Not applicable	Not applicable	Not applicable	Not applicable	Don’t know							Somewhat hesitant	Disagree	Yes	Strongly Agree	Strongly Agree	Don’t Know	Disagree	Disagree	Disagree	Agree	Disagree	Disagree	Agree	Disagree				Disagree
1225	49	Female	Remarried	Bachelor	Senior	Governmental	Shenzhen Hospital affiliated to Southern Medical University	Nurse	4	No		Yes	Yes	Yes	Yes	No	A little worried	Very worried	Very worried	A little worried	No	Yes	Yes	Yes	Yes	Once or twice	Never	Once or twice	Not worried	Not worried	Not worried	Not hesitant	Strongly Agree	Yes	Strongly Agree	Strongly Agree	Don’t Know	Disagree	Disagree	Disagree	Disagree	Disagree	Agree	Agree	Disagree				Disagree
948	28	Female	Married	Master or higher	Primary	Governmental	Shenzhen Hospital affiliated to Southern Medical University	Doctor	1	No		No	Yes	Yes	No	No	Not worried	Very worried	Worried	Not worried	No	No	Yes	Yes	Don’t know							A little hesitant	Strongly Agree	Don’t Know	Strongly Agree	Strongly Agree	Don’t Know	Disagree	Disagree	Disagree	Disagree	Disagree	Agree	Agree	Disagree				Disagree
1179	25	Male	Married	Bachelor	Primary	Governmental	Shenzhen Hospital affiliated to Southern Medical University	Doctor	1	Yes	≥11	Yes	Yes	Yes	Yes	No	Not worried	A little worried	Not worried	Not worried	No	No	Yes	No	Don’t know							Not hesitant	Strongly Agree	Don’t Know	Strongly Agree	Strongly Agree	No	Disagree	Strongly Disagree	Disagree	Strongly Disagree	Strongly Disagree	Strongly Disagree	Strongly Disagree	Strongly Disagree				Strongly Disagree
1059	22	Female	Married	High school or others	None	Governmental	Shenzhen Hospital affiliated to Southern Medical University	Receptionist	1	No	0	No	Yes	Yes	No	No	Not applicable	Not applicable	Not applicable	Not applicable	Not applicable	Not applicable	Not applicable	Not applicable	Don’t know							A little hesitant	Disagree	Don’t Know	Strongly Agree	Strongly Agree	Don’t Know	Disagree	Disagree	Disagree	Disagree	Disagree	Disagree	Agree	Disagree				Disagree
959	46	Female	Widowed	Bachelor	Intermediate	Governmental	Shenzhen Hospital affiliated to Southern Medical University	Nurse	4	No	1-5	Yes	Yes	Yes	Yes	No	Not worried	A little worried	A little worried	Not worried	No	No	No	No	Yes	Never	Never	Never	Not worried	Not worried	Not worried	Not hesitant	Agree	Yes	Strongly Agree	Strongly Agree	Yes	Disagree	Disagree	Strongly Disagree	Strongly Disagree	Strongly Disagree	Strongly Disagree	Disagree	Disagree				Disagree
1265	48	Male	Unmarried	High school or others	None	Governmental	Shenzhen Hospital affiliated to Southern Medical University	Cleaning staff	1	No	0	Yes	Yes	Yes	Yes	Yes	Not applicable	Not applicable	Not applicable	Not applicable	Not applicable	Not applicable	Not applicable	Not applicable	Don’t know							Not hesitant	Disagree	Don’t Know	Disagree	Disagree	Don’t Know	Strongly Disagree	Strongly Disagree	Strongly Disagree	Strongly Disagree	Strongly Disagree	Strongly Disagree	Strongly Disagree	Strongly Disagree				Strongly Disagree
1005	26	Female	Married	Bachelor	Primary	Governmental	Shenzhen Hospital affiliated to Southern Medical University	Nurse	1	Yes	1-5	No	Yes	No	No	No	Not worried	A little worried	Worried	Not worried	No	No	Yes	Yes	Yes	Never	Never	Never	Not worried	Not worried	Not worried	A little hesitant	Strongly Agree	Yes	Disagree	Strongly Agree	Don’t Know	Agree	Disagree	Disagree	Disagree	Disagree	Disagree	Agree	Disagree				Disagree
332	29	Female	Unmarried	High school or others	None	Private	Shenzhen Fuya Hospital	Cashier	1	No	0	No	No	No	No	Yes	Not applicable	Not applicable	Not applicable	Not applicable	Not applicable	Not applicable	Not applicable	Not applicable	Don’t know							Somewhat hesitant	Disagree	Don’t Know	Disagree	Disagree	Don’t Know	Disagree	Disagree	Strongly Disagree	Agree	Disagree	Agree	Agree	Agree	Disagree	Disagree	Agree	Disagree
376	31	Female	Unmarried	Diploma	Primary	Private	Shenzhen Fuya Hospital	Nurse	2	No		Yes	Yes	Yes	No	No	A little worried	Very worried	Very worried	A little worried	No	Yes	Yes	Yes	No							A little hesitant	Agree	Don’t Know	Strongly Agree	Strongly Agree	Yes	Disagree	Agree	Agree	Agree	Disagree	Disagree	Agree	Disagree				Disagree
410	24	Female	Married	Diploma	Primary	Private	Shenzhen Fuya Hospital	Midwife	1	No		Yes	Yes	Yes	Yes	No	A little worried	A little worried	Not worried	Not worried	No	No	No	No	No							A little hesitant	Strongly Agree	No	Strongly Agree	Strongly Agree	Yes	Disagree	Disagree	Disagree	Disagree	Strongly Disagree	Disagree	Agree	Disagree				Disagree
322	25	Female	Married	High school or others	None	Private	Shenzhen Fuya Hospital	Nurse	1	No		No	Yes	Yes	No	No	Very worried	Very worried	Very worried	Very worried	Yes	Yes	Yes	Yes	Yes	Never	Never	Never	Not worried	Not worried	Not worried	Not hesitant	Strongly Agree	Yes	Strongly Agree	Strongly Agree	Don’t Know	Disagree	Strongly Disagree	Strongly Disagree	Strongly Disagree	Strongly Disagree	Agree	Strongly Agree	Strongly Disagree				Strongly Disagree
337	36	Female	Divorced	Bachelor	Primary	Private	Shenzhen Fuya Hospital	Obstetrician and Gynecologist	3	No		Yes	Yes	Yes	Yes	No	A little worried	A little worried	A little worried	Not worried	No	No	No	No	Don’t know							Not hesitant	Strongly Agree	Don’t Know	Strongly Agree	Strongly Agree	Yes	Agree	Disagree	Disagree	Disagree	Disagree	Disagree	Strongly Agree	Disagree				Disagree
309	27	Male	Married	Diploma	None	Private	Shenzhen Fuya Hospital	Public health care physician	1	No		No	No	No	No	Yes	Not worried	A little worried	A little worried	Not worried	No	Yes	Yes	Yes	Don’t know							A little hesitant	Disagree	Don’t Know	Strongly Agree	Strongly Agree	No	Strongly Disagree	Disagree	Strongly Disagree	Disagree	Disagree	Agree	Agree	Disagree				Disagree
336	32	Female	Unmarried	Bachelor	Primary	Private	Shenzhen Fuya Hospital	Obstetrician and Gynecologist	2	No		Yes	Yes	Yes	Yes	No	A little worried	A little worried	A little worried	Not worried	No	No	No	No	Don’t know							Not hesitant	Strongly Agree	Don’t Know	Strongly Agree	Strongly Agree	Yes	Agree	Disagree	Disagree	Disagree	Disagree	Disagree	Agree	Disagree				Disagree
439	23	Female	Married	Diploma	Primary	Private	Shenzhen Fuya Hospital	Nurse	1	No	6-10	No	Yes	Yes	No	No	Not worried	Not worried	Not worried	Not worried	No	No	No	Yes	Yes	Once or twice	Never	Never	Not worried	Not worried	Not worried	Not hesitant	Agree	Yes	Strongly Agree	Strongly Agree	Yes	Agree	Disagree	Disagree	Disagree	Disagree	Agree	Disagree	Disagree				Disagree
319	22	Female	Married	Diploma	None	Private	Shenzhen Fuya Hospital	Cashier	1	No	0	No	No	No	No	Yes	Not applicable	Not applicable	Not applicable	Not applicable	Yes	Not applicable	Not applicable	Not applicable	Don’t know							Somewhat hesitant	Disagree	Don’t Know	Disagree	Disagree	Don’t Know	Agree	Disagree	Agree	Agree	Agree	Agree	Agree	Disagree				Disagree
397	25	Female	Married	Diploma	Primary	Private	Shenzhen Fuya Hospital	Nurse	1	No		Yes	Yes	Yes	Yes	No	A little worried	A little worried	A little worried	Not worried	No	Yes	No	Yes	Yes	Never	Never	Never	Not worried	Not worried	Not worried	A little hesitant	Strongly Agree	Don’t Know	Strongly Agree	Strongly Agree	Yes	Disagree	Disagree	Disagree	Disagree	Disagree	Agree	Strongly Agree	Disagree				Disagree
330	29	Male	Unmarried	Diploma	Primary	Private	Shenzhen Fuya Hospital	Doctor	2	No		No	Yes	Yes	No	No	Not worried	A little worried	A little worried	Not worried	No	No	No	No	Yes	Never	Never	Never	Not worried	Not worried	Not worried	A little hesitant	Strongly Agree	Yes	Strongly Agree	Strongly Agree	Don’t Know	Disagree	Strongly Disagree	Disagree	Disagree	Disagree	Disagree	Agree	Agree	Agree	Agree	Disagree	Agree
305	30	Female	Unmarried	Diploma	Primary	Private	Shenzhen Fuya Hospital	Nurse	2	Yes		No	Yes	Yes	No	No	Not applicable	Not applicable	Not applicable	Not applicable	Yes	Yes	Yes	Yes	Don’t know							Very hesitant	Strongly Agree	No	Strongly Agree	Strongly Agree	Yes	Agree	Disagree	Disagree	Agree	Disagree	Agree	Strongly Agree	Disagree				Disagree
435	52	Male	Unmarried	High school or others	None	Private	Shenzhen Fuya Hospital	Cleaning staff	1	No		No	Yes	No	No	No	A little worried	A little worried	A little worried	A little worried	No	No	Yes	Yes	Don’t know							A little hesitant	Disagree	Yes	Strongly Agree	Strongly Agree	Yes	Strongly Disagree	Strongly Disagree	Strongly Disagree	Disagree	Disagree	Agree	Agree	Disagree				Disagree
340	39	Male	Unmarried	Diploma	Intermediate	Private	Shenzhen Fuya Hospital	Doctor	3	No	1-5	Yes	Yes	Yes	Yes	No	Not worried	Not worried	Not worried	Not worried	No	No	No	Yes	Yes	Never	Never	Never	Not worried	Not worried	Not worried	Not hesitant	Agree	No	Disagree	Agree	Yes	Agree	Disagree	Disagree	Strongly Agree	Disagree	Agree	Disagree	Disagree				Disagree
355	27	Female	Unmarried	Diploma	Primary	Private	Shenzhen Fuya Hospital	Nurse	1	Yes		Yes	Yes	Yes	Yes	No	Not worried	A little worried	A little worried	Not worried	No	Yes	No	Yes	Yes	Never	Never	Never	Not worried	Not worried	Not worried	Not hesitant	Agree	Yes	Strongly Agree	Strongly Agree	Yes	Disagree	Disagree	Disagree	Disagree	Disagree	Disagree	Agree	Disagree				Disagree
304	25	Male	Married	Diploma	Primary	Private	Shenzhen Fuya Hospital	Nurse	1	No	0	No	Yes	Yes	No	No	A little worried	Worried	A little worried	Not worried	No	No	No	Yes	Don’t know							A little hesitant	Agree	No	Agree	Strongly Agree	Don’t Know	Disagree	Strongly Agree	Strongly Disagree	Strongly Agree	Agree	Strongly Agree	Agree	Strongly Agree	Agree	Agree	Disagree	Strongly Disagree
306	26	Female	Unmarried	Diploma	Primary	Private	Shenzhen Fuya Hospital	Nurse	2	No		No	Yes	Yes	No	No	A little worried	Very worried	Worried	A little worried	No	Yes	Yes	Yes	Don’t know							Very hesitant	Strongly Agree	No	Strongly Agree	Strongly Agree	Yes	Agree	Disagree	Agree	Disagree	Disagree	Agree	Strongly Agree	Disagree				Disagree
295	45	Female	Unmarried	Bachelor	None	Private	Shenzhen Fuya Hospital	Cashier	1	No		No	No	No	No	Yes	Not worried	Worried	A little worried	Not worried	Not applicable	Yes	Yes	Yes	Yes	Once or twice	Never	Once or twice	A little worried	Not worried	Not worried	Not hesitant	Agree	Don’t Know	Strongly Agree	Strongly Agree	Don’t Know	Agree	Strongly Disagree	Disagree	Disagree	Disagree	Agree	Agree	Disagree				Disagree
320	27	Female	Unmarried	Diploma	None	Private	Shenzhen Fuya Hospital	Midwife	1	No		Yes	Yes	Yes	No	No	Not worried	A little worried	A little worried	Not worried	No	Yes	No	Yes	Don’t know							Somewhat hesitant	Strongly Agree	Don’t Know	Strongly Agree	Strongly Agree	Yes	Disagree	Disagree	Disagree	Disagree	Strongly Disagree	Agree	Agree	Disagree				Disagree
327	26	Female	Married	Bachelor	Primary	Private	Shenzhen Fuya Hospital	Medical /Laboratory Technician	1	No	6-10	No	Yes	Yes	Yes	No	A little worried	A little worried	A little worried	Not worried	No	No	Yes	Yes	Yes	Never	Never	Never	Not worried	Not worried	Not worried	A little hesitant	Disagree	No	Strongly Agree	Strongly Agree	No	Disagree	Disagree	Disagree	Disagree	Disagree	Agree	Agree	Disagree				Disagree
307	31	Female	Unmarried	Bachelor	Primary	Private	Shenzhen Fuya Hospital	Pharmacist	2	Yes	1-5	Yes	Yes	Yes	Yes	No	Not worried	Not worried	Not worried	Not worried	No	No	No	No	Don’t know							Not hesitant	Strongly Agree	No	Strongly Agree	Strongly Agree	Yes	Strongly Disagree	Disagree	Disagree	Disagree	Disagree	Disagree	Agree	Disagree				Disagree
346	50	Female	Unmarried	Master or higher	Intermediate	Private	Shenzhen Fuya Hospital	Doctor	2	No	0	Yes	Yes	Yes	Yes	No	Not worried	Not worried	Not worried	Not worried	No	No	No	No	Yes	Never	Never	Never	Not worried	Not worried	Not worried	Not hesitant	Strongly Agree	Yes	Strongly Agree	Strongly Agree	Yes	Disagree	Strongly Disagree	Strongly Disagree	Strongly Disagree	Strongly Disagree	Disagree	Agree	Strongly Disagree				Strongly Disagree
311	24	Female	Married	Diploma	Primary	Private	Shenzhen Fuya Hospital	Nurse	1	No		No	Yes	Yes	No	No	A little worried	Worried	Worried	Not worried	Not applicable	Not applicable	Yes	Not applicable	Don’t know							Not hesitant	Strongly Agree	Don’t Know	Disagree	Strongly Agree	Don’t Know	Disagree	Disagree	Disagree	Disagree	Disagree	Agree	Agree	Agree	Disagree	Agree	Agree	Disagree
321	33	Male	Unmarried	Bachelor	Primary	Private	Shenzhen Fuya Hospital	Doctor	2	No		No	Yes	Yes	No	No	A little worried	Very worried	Worried	Not worried	Yes	Yes	No	Yes	Don’t know							Somewhat hesitant	Agree	No	Agree	Agree	No	Disagree	Agree	Disagree	Agree	Disagree	Agree	Agree	Agree	Agree	Disagree	Agree	Agree
335	32	Female	Unmarried	Diploma	Primary	Private	Shenzhen Fuya Hospital	Nurse	2	No		No	Yes	Yes	No	No	Very worried	Very worried	Very worried	Very worried	No	Yes	Yes	Yes	Don’t know							Not hesitant	Disagree	Don’t Know	Strongly Agree	Strongly Agree	Don’t Know	Agree	Disagree	Disagree	Agree	Disagree	Agree	Strongly Agree	Disagree				Disagree
308	34	Female	Unmarried	Diploma	Primary	Private	Shenzhen Fuya Hospital	Pharmacist	1	No		No	No	Yes	Yes	No	Not applicable	Not applicable	Not applicable	Not worried	Not applicable	Not applicable	Not applicable	Not applicable	Don’t know							Not hesitant	Agree	Don’t Know	Strongly Agree	Strongly Agree	Yes	Strongly Disagree	Strongly Disagree	Disagree	Disagree	Disagree	Agree	Strongly Agree	Strongly Disagree				Strongly Disagree
349	26	Female	Unmarried	Diploma	Primary	Private	Shenzhen Fuya Hospital	Nurse	1	No	1-5	No	Yes	No	No	No	A little worried	A little worried	Not applicable	Not applicable	No	Not applicable	Not applicable	Not applicable	Yes	Never	Never	Never	Not worried	A little worried	Not worried	Not hesitant	Disagree	Don’t Know	Strongly Agree	Strongly Agree	Don’t Know	Strongly Disagree	Strongly Disagree	Disagree	Disagree	Disagree	Agree	Disagree	Disagree				Disagree
313	25	Female	Married	Diploma	Primary	Private	Shenzhen Fuya Hospital	Nurse	1	No		Yes	Yes	Yes	No	No	Not worried	Worried	A little worried	Not worried	No	No	No	Yes	Yes	Never	Never	Never	Not worried	Not worried	Not worried	Not hesitant	Strongly Agree	Yes	Strongly Agree	Strongly Agree	Yes	Agree	Agree	Disagree	Disagree	Disagree	Disagree	Agree	Disagree				Disagree
444	53	Male	Unmarried	High school or others	None	Private	Shenzhen Fuya Hospital	Cleaning staff	3	No	0	Yes	Yes	Yes	Yes	No	Not applicable	Not worried	Not applicable	Not applicable	Yes	Not applicable	Yes	Yes	Don’t know							Somewhat hesitant	Strongly Agree	Don’t Know	Disagree	Disagree	Don’t Know	Agree	Disagree	Disagree	Agree	Disagree	Agree	Agree	Disagree				Disagree
364	62	Male	Unmarried	Bachelor	Senior	Private	Shenzhen Fuya Hospital	Doctor	4	No		No	Yes	Yes	No	No	A little worried	Worried	A little worried	Not worried	No	Yes	No	Not applicable	No							Somewhat hesitant	Strongly Agree	Yes	Strongly Agree	Strongly Agree	Yes	Agree	Agree	Disagree	Disagree	Disagree	Agree	Agree	Agree	Agree	Disagree	Agree	Agree
377	23	Female	Married	Diploma	Primary	Private	Shenzhen Fuya Hospital	Nurse	1	No	1-5	Yes	Yes	Yes	Yes	No	A little worried	Worried	Worried	Worried	No	Yes	Yes	Yes	Yes	Never	Never	Never	A little worried	A little worried	Worried	A little hesitant	Agree	Yes	Strongly Agree	Strongly Agree	Yes	Agree	Disagree	Disagree	Disagree	Disagree	Disagree	Agree	Disagree				Disagree
333	34	Female	Married	Bachelor	Intermediate	Private	Shenzhen Fuya Hospital	Nurse	2	No		Yes	Yes	Yes	Yes	No	Not worried	Not worried	Not worried	Not worried	No	No	No	Yes	Yes	Never	Never	Never	Not worried	Not worried	Not worried	Not hesitant	Strongly Agree	Yes	Strongly Agree	Strongly Agree	Yes	Agree	Agree	Disagree	Agree	Disagree	Strongly Agree	Agree	Disagree				Disagree
384	24	Female	Married	Diploma	Primary	Private	Shenzhen Fuya Hospital	Midwife	1	No	0	Yes	Yes	Yes	Yes	No	A little worried	Worried	A little worried	Not worried	No	No	Yes	Yes	No							A little hesitant	Strongly Agree	Yes	Strongly Agree	Strongly Agree	Yes	Agree	Strongly Disagree	Disagree	Disagree	Disagree	Agree	Disagree	Disagree				Disagree
481	50	Female	Unmarried	High school or others	None	Private	Shenzhen Fuya Hospital	Cleaning staff	1	No		Yes	Yes	Yes	Yes	No	Not applicable	Not applicable	Not applicable	Not applicable	Not applicable	Not applicable	Not applicable	Not applicable	Don’t know							A little hesitant	Disagree	Don’t Know	Strongly Agree	Strongly Agree	Don’t Know	Disagree	Agree	Disagree	Disagree	Disagree	Disagree	Agree	Disagree				Disagree
303	23	Female	Married	High school or others	None	Private	Shenzhen Fuya Hospital	Receptionist	1	No		No	Yes	No	No	No	Not applicable	Very worried	Worried	Not applicable	Not applicable	Yes	Yes	Yes	Don’t know							Very hesitant	Strongly Agree	Yes	Disagree	Disagree	Yes	Strongly Disagree	Disagree	Strongly Agree	Strongly Agree	Strongly Disagree	Strongly Agree	Strongly Agree	Strongly Disagree				Strongly Disagree
314	33	Male	Married	High school or others	None	Private	Shenzhen Fuya Hospital	Cleaning staff	1	No		No	No	No	No	Yes	Not applicable	Not applicable	Not applicable	Not applicable	Not applicable	Not applicable	Not applicable	Not applicable	Don’t know							A little hesitant	Disagree	Don’t Know	Disagree	Disagree	Don’t Know	Disagree	Strongly Disagree	Disagree	Disagree	Disagree	Agree	Agree	Disagree				Disagree
301	22	Male	Married	Diploma	None	Private	Shenzhen Fuya Hospital	Doctor	1	No		Yes	Yes	Yes	Yes	No	Not applicable	Not applicable	Not applicable	Not applicable	Not applicable	Not applicable	Not applicable	Not applicable	Don’t know							Not hesitant	Disagree	Don’t Know	Strongly Agree	Strongly Agree	Don’t Know	Strongly Disagree	Strongly Disagree	Strongly Disagree	Strongly Disagree	Strongly Disagree	Strongly Disagree	Strongly Disagree	Strongly Disagree				Strongly Disagree
368	40	Male	Unmarried	Diploma	Intermediate	Private	Shenzhen Fuya Hospital	Medical /Laboratory Technician	3	No	1-5	No	Yes	Yes	No	No	Not worried	Very worried	A little worried	Not worried	No	No	Yes	Yes	Yes	Never	Never	Never	A little worried	Worried	Worried	A little hesitant	Strongly Agree	Yes	Strongly Agree	Strongly Agree	Don’t Know	Disagree	Disagree	Agree	Agree	Strongly Disagree	Strongly Disagree	Disagree	Disagree				Strongly Disagree
455	28	Female	Unmarried	Diploma	Primary	Private	Shenzhen Fuya Hospital	Nurse	1	No	0	No	Yes	Yes	No	No	A little worried	Very worried	Worried	Worried	Not applicable	Yes	Yes	Yes	Don’t know							A little hesitant	Disagree	Don’t Know	Strongly Agree	Strongly Agree	Yes	Disagree	Disagree	Strongly Disagree	Agree	Disagree	Agree	Agree	Disagree				Disagree
334	21	Male	Married	Bachelor	Primary	Private	Shenzhen Fuya Hospital	Doctor	1	No		Yes	No	No	No	No	Not worried	Not worried	Not worried	Not worried	Yes	Yes	Yes	No	No							A little hesitant	Agree	Yes	Strongly Agree	Strongly Agree	Yes	Disagree	Disagree	Agree	Agree	Disagree	Disagree	Agree	Disagree				Disagree
316	20	Female	Married	High school or others	None	Private	Shenzhen Fuya Hospital	Receptionist	1	No		No	No	No	No	Yes	Not applicable	Not applicable	Not applicable	Not applicable	Not applicable	Yes	Yes	Yes	No							A little hesitant	Disagree	Don’t Know	Strongly Agree	Disagree	Don’t Know	Strongly Agree	Disagree	Agree	Agree	Agree	Agree	Agree	Disagree				Disagree
488	53	Male	Unmarried	High school or others	None	Private	Shenzhen Fuya Hospital	Cleaning staff	1	No		No	No	No	No	Yes	A little worried	Not applicable	Not applicable	Not applicable	Not applicable	Not applicable	Not applicable	Not applicable	Don’t know							Somewhat hesitant	Disagree	No	Disagree	Disagree	Yes	Disagree	Disagree	Disagree	Disagree	Disagree	Agree	Disagree	Disagree				Disagree
315	23	Female	Married	Diploma	None	Private	Shenzhen Fuya Hospital	Nurse	1	No		No	Yes	No	No	No	A little worried	Worried	A little worried	Not worried	Not applicable	Not applicable	Not applicable	Not applicable	Don’t know							A little hesitant	Strongly Agree	Yes	Strongly Agree	Strongly Agree	Don’t Know	Disagree	Disagree	Disagree	Disagree	Disagree	Agree	Agree	Disagree				Disagree
300	41	Female	Unmarried	Bachelor	Intermediate	Private	Shenzhen Fuya Hospital	Medical /Laboratory Technician	3	Yes		Yes	Yes	Yes	Yes	No	Not worried	A little worried	A little worried	Not worried	Yes	Yes	Yes	No	Don’t know							A little hesitant	Disagree	Don’t Know	Strongly Agree	Strongly Agree	Yes	Strongly Agree	Strongly Disagree	Disagree	Disagree	Disagree	Strongly Agree	Strongly Agree	Strongly Disagree				Disagree
482	20	Female	Married	Diploma	None	Private	Shenzhen Fuya Hospital	Receptionist	1	No		Yes	Yes	Yes	Yes	No	A little worried	A little worried	Worried	A little worried	No	Yes	Yes	Yes	Don’t know							A little hesitant	Agree	No	Strongly Agree	Strongly Agree	Yes	Agree	Strongly Disagree	Disagree	Agree	Agree	Disagree	Disagree	Disagree				Disagree
331	21	Female	Married	Diploma	None	Private	Shenzhen Fuya Hospital	Medical Records Personnel	1	No	1-5	Yes	Yes	Yes	Yes	No	A little worried	Very worried	Very worried	Not worried	Not applicable	Not applicable	No	Yes	Yes	Never	Never	Never	Not worried	Not worried	Not worried	A little hesitant	Strongly Agree	Yes	Strongly Agree	Strongly Agree	Yes	Disagree	Disagree	Strongly Disagree	Strongly Disagree	Strongly Disagree	Agree	Disagree	Disagree				Disagree
339	28	Male	Married	Diploma	None	Private	Shenzhen Fuya Hospital	Doctor	1	No	0	Yes	No	Yes	No	No	Not worried	Very worried	Very worried	Not worried	No	Yes	Yes	No	Yes	Never	Never	Never	A little worried	A little worried	A little worried	A little hesitant	Agree	No	Strongly Agree	Strongly Agree	Yes	Disagree	Disagree	Disagree	Disagree	Disagree	Strongly Agree	Strongly Agree	Disagree				Disagree
353	62	Male	Unmarried	Diploma	Senior	Private	Shenzhen Fuya Hospital	Doctor	4	No		No	Yes	Yes	No	No	Not worried	Not worried	Not worried	Not worried	No	No	No	No	Don’t know							Not hesitant	Strongly Agree	No	Disagree	Strongly Agree	No	Disagree	Disagree	Disagree	Disagree	Disagree	Agree	Agree	Disagree				Disagree
350	44	Female	Divorced	Bachelor	Intermediate	Private	Shenzhen Fuya Hospital	Obstetrician and Gynecologist	4	No		Yes	Yes	Yes	Yes	No	Worried	Worried	Worried	Not worried	No	No	No	No	Don’t know							A little hesitant	Strongly Agree	Yes	Strongly Agree	Strongly Agree	Yes	Agree	Disagree	Disagree	Disagree	Disagree	Disagree	Agree	Disagree				Disagree
329	29	Male	Unmarried	High school or others	Primary	Private	Shenzhen Fuya Hospital	Cleaning staff	1	No		No	No	No	No	Yes	Not applicable	Not applicable	Not applicable	Not applicable	Not applicable	Not applicable	Not applicable	Not applicable	Don’t know							Somewhat hesitant	Disagree	Don’t Know	Disagree	Disagree	Don’t Know	Disagree	Strongly Disagree	Strongly Disagree	Agree	Strongly Disagree	Agree	Agree	Agree	Disagree	Disagree	Agree	Disagree
476	56	Male	Unmarried	High school or others	None	Private	Shenzhen Fuya Hospital	Cleaning staff	1	No		No	No	No	No	Yes	A little worried	Not applicable	Not applicable	Not applicable	Not applicable	Not applicable	Not applicable	Not applicable	Don’t know							Somewhat hesitant	Disagree	No	Disagree	Disagree	Yes	Disagree	Disagree	Disagree	Disagree	Disagree	Agree	Disagree	Disagree				Disagree
395	25	Male	Married	Bachelor	Primary	Private	Shenzhen Fuya Hospital	Medical /Laboratory Technician	1	No		Yes	Yes	Yes	Yes	No	A little worried	A little worried	A little worried	A little worried	Yes	Yes	Yes	Yes	No							A little hesitant	Strongly Agree	Yes	Strongly Agree	Strongly Agree	Yes	Agree	Agree	Agree	Agree	Agree	Agree	Agree	Disagree				Disagree
387	23	Female	Married	Diploma	None	Private	Shenzhen Fuya Hospital	Doctor	1	No		No	Yes	Yes	No	No	Worried	Very worried	Very worried	Worried	No	No	Yes	Yes	Don’t know							Somewhat hesitant	Strongly Agree	Yes	Strongly Agree	Strongly Agree	Don’t Know	Disagree	Disagree	Agree	Agree	Disagree	Agree	Agree	Agree	Agree	Disagree	Agree	Agree
302	20	Female	Married	Diploma	Primary	Private	Shenzhen Fuya Hospital	Receptionist	1	No	1-5	Yes	Yes	Yes	Yes	No	Not worried	A little worried	Not worried	Not worried	No	Yes	No	Yes	Don’t know							Not hesitant	Disagree	Yes	Strongly Agree	Strongly Agree	Yes	Disagree	Disagree	Disagree	Disagree	Disagree	Agree	Disagree	Disagree				Disagree
480	26	Female	Unmarried	High school or others	None	Private	Shenzhen Fuya Hospital	Receptionist	1	No	0	No	No	Yes	No	No	A little worried	A little worried	A little worried	A little worried	Not applicable	Yes	Yes	Not applicable	Don’t know							A little hesitant	Disagree	Don’t Know	Disagree	Disagree	Don’t Know	Strongly Disagree	Strongly Disagree	Strongly Disagree	Strongly Disagree	Strongly Disagree	Strongly Disagree	Strongly Disagree	Strongly Disagree				Strongly Disagree
475	50	Female	Unmarried	High school or others	None	Private	Shenzhen Fuya Hospital	Cleaning staff	1	No		No	Yes	No	No	No	Not worried	Not applicable	Not applicable	Not applicable	Not applicable	Not applicable	Not applicable	Not applicable	Don’t know							Somewhat hesitant	Disagree	No	Strongly Agree	Disagree	Yes	Disagree	Disagree	Disagree	Disagree	Disagree	Agree	Agree	Disagree				Disagree
494	33	Male	Married	High school or others	None	Private	Shenzhen Fuya Hospital	Cleaning staff	2	No		No	No	No	No	Yes	A little worried	A little worried	A little worried	A little worried	Not applicable	Yes	Yes	Not applicable	Don’t know							Somewhat hesitant	Agree	Yes	Agree	Strongly Agree	Yes	Disagree	Disagree	Disagree	Disagree	Disagree	Agree	Agree	Disagree				Agree
485	49	Female	Unmarried	High school or others	None	Private	Shenzhen Fuya Hospital	Cleaning staff	1	No		No	No	No	No	Yes	A little worried	Not applicable	Not applicable	Not applicable	Not applicable	Not applicable	Not applicable	Not applicable	Don’t know							Somewhat hesitant	Disagree	No	Disagree	Disagree	Yes	Disagree	Disagree	Disagree	Disagree	Disagree	Agree	Disagree	Disagree				Disagree
495	55	Female	Widowed	Diploma	Senior	Private	Shenzhen Fuya Hospital	Obstetrician and Gynecologist	4	Yes	1-5	Yes	Yes	Yes	Yes	No	Not worried	Worried	Worried	Not worried	No	Yes	No	Yes	Yes	Never	Never	Never	Not worried	A little worried	Not worried	Not hesitant	Strongly Agree	Yes	Strongly Agree	Strongly Agree	Yes	Agree	Disagree	Disagree	Disagree	Disagree	Agree	Agree	Disagree				Disagree
341	30	Female	Married	Diploma	None	Private	Shenzhen Fuya Hospital	Cashier	2	No	0	No	No	No	No	Yes	Not applicable	Not applicable	Not applicable	Not applicable	Not applicable	Not applicable	Not applicable	Not applicable	Yes	Never	Never	Never	Not worried	Not worried	Not worried	A little hesitant	Disagree	Don’t Know	Disagree	Disagree	Don’t Know	Agree	Agree	Agree	Agree	Disagree	Agree	Agree	Agree	Disagree	Disagree	Agree	Agree
400	34	Female	Unmarried	Bachelor	Intermediate	Private	Shenzhen Fuya Hospital	Nurse	3	No	1-5	Yes	Yes	Yes	Yes	No	Not worried	Not worried	Not worried	Not worried	No	No	No	No	Yes	Never	Never	Never	Not worried	Not worried	Not worried	Not hesitant	Strongly Agree	Yes	Strongly Agree	Strongly Agree	Yes	Disagree	Disagree	Disagree	Strongly Disagree	Strongly Disagree	Disagree	Strongly Disagree	Disagree				Disagree
418	49	Male	Divorced	High school or others	None	Private	Shenzhen Fuya Hospital	Cleaning staff	2	No	0	No	No	No	No	Yes	Not applicable	Not applicable	Not applicable	Not applicable	Not applicable	Not applicable	Not applicable	Not applicable	Don’t know							Not hesitant	Disagree	Don’t Know	Disagree	Disagree	Don’t Know	Agree	Disagree	Agree	Agree	Agree	Agree	Strongly Agree	Disagree				Agree
437	32	Male	Married	Diploma	Primary	Private	Shenzhen Fuya Hospital	Anesthetist	2	No	1-5	Yes	Yes	Yes	Yes	No	Not worried	Not applicable	Not applicable	Not applicable	Not applicable	Yes	Yes	Yes	Don’t know							Somewhat hesitant	Disagree	No	Strongly Agree	Strongly Agree	Don’t Know	Agree	Disagree	Agree	Agree	Disagree	Agree	Strongly Agree	Disagree				Disagree
388	26	Female	Unmarried	Diploma	Primary	Private	Shenzhen Fuya Hospital	Nurse	1	No	0	No	Yes	Yes	No	No	Not worried	A little worried	A little worried	Not worried	No	Yes	Yes	Yes	Don’t know							A little hesitant	Disagree	Yes	Strongly Agree	Strongly Agree	Yes	Agree	Disagree	Disagree	Disagree	Disagree	Strongly Agree	Agree	Agree	Agree	Agree	Agree	Disagree
317	59	Female	Unmarried	Diploma	Intermediate	Private	Shenzhen Fuya Hospital	Medical /Laboratory Technician	4	No	1-5	Yes	Yes	Yes	Yes	No	Not worried	Not worried	Not worried	Not worried	Not applicable	Yes	Yes	Yes	Yes	Never	Never	Never	A little worried	Not worried	Not worried	Not hesitant	Agree	Don’t Know	Strongly Agree	Strongly Agree	Yes	Agree	Disagree	Disagree	Disagree	Disagree	Disagree	Disagree	Disagree				Disagree
365	44	Female	Unmarried	Bachelor	None	Governmental	Shenzhen Integrated Chinese and Western Medicine Hospital	Doctor	3	No	0	No	Yes	Yes	Yes	No	Worried	Worried	Worried	Not worried	No	No	No	Yes	Yes	Never	Never	Never	Not worried	Not worried	Not worried	Somewhat hesitant	Strongly Agree	Yes	Strongly Agree	Strongly Agree	Don’t Know	Disagree	Agree	Disagree	Agree	Disagree	Strongly Agree	Strongly Agree	Strongly Disagree				Disagree
565	45	Female	Unmarried	Diploma	Senior	Governmental	Shenzhen Integrated Chinese and Western Medicine Hospital	Nurse	4	Yes	≥11	Yes	Yes	Yes	Yes	No	Not worried	A little worried	A little worried	Not worried	No	Yes	Yes	Yes	Yes	Never	Never	Never	Not worried	Not worried	Not worried	Not hesitant	Strongly Agree	Yes	Strongly Agree	Strongly Agree	Yes	Agree	Agree	Disagree	Disagree	Disagree	Disagree	Agree	Strongly Disagree				Strongly Disagree
451	50	Female	Unmarried	Bachelor	Senior	Governmental	Shenzhen Integrated Chinese and Western Medicine Hospital	Obstetrician and Gynecologist	4	No	1-5	Yes	Yes	Yes	Yes	No	Not worried	A little worried	A little worried	Not worried	No	No	No	No	Yes	Never	Never	Never	Not worried	Not worried	Not worried	Not hesitant	Strongly Agree	Yes	Strongly Agree	Strongly Agree	Yes	Disagree	Disagree	Disagree	Disagree	Disagree	Disagree	Disagree	Disagree				Disagree
604	20	Female	Married	High school or others	None	Governmental	Shenzhen Integrated Chinese and Western Medicine Hospital	Nurse	1	No	0	Yes	Yes	Yes	Yes	No	Worried	Very worried	Very worried	Not worried	No	Yes	No	Yes	Yes	Never	Never	Never	Not worried	Not worried	Not worried	A little hesitant	Strongly Agree	Yes	Strongly Agree	Strongly Agree	No	Disagree	Disagree	Disagree	Disagree	Disagree	Agree	Agree	Disagree				Disagree
507	38	Male	Unmarried	Master or higher	Senior	Governmental	Shenzhen Integrated Chinese and Western Medicine Hospital	Doctor	3	No	6-10	Yes	Yes	Yes	No	No	Not worried	Worried	A little worried	Not worried	Yes	Yes	Yes	Yes	Yes	Never	Never	Never	Not worried	Not worried	Not worried	A little hesitant	Agree	Yes	Strongly Agree	Strongly Agree	No	Strongly Agree	Disagree	Agree	Agree	Agree	Agree	Strongly Agree	Disagree				Disagree
535	38	Female	Unmarried	Bachelor	Intermediate	Governmental	Shenzhen Integrated Chinese and Western Medicine Hospital	Nurse	3	Yes	≥11	Yes	Yes	Yes	Yes	No	Not worried	Worried	Worried	Not worried	No	Yes	Yes	Yes	Yes	Never	Never	Never	Not worried	Not worried	Not worried	Not hesitant	Agree	No	Strongly Agree	Strongly Agree	Yes	Agree	Strongly Disagree	Disagree	Agree	Disagree	Agree	Agree	Disagree				Disagree
338	49	Female	Unmarried	Bachelor	Senior	Governmental	Shenzhen Integrated Chinese and Western Medicine Hospital	Obstetrician and Gynecologist	4	Yes	0	Yes	Yes	Yes	Yes	No	A little worried	A little worried	A little worried	Not worried	No	No	No	No	Yes	Never	Never	Never	A little worried	A little worried	A little worried	A little hesitant	Agree	Don’t Know	Strongly Agree	Strongly Agree	Yes	Strongly Disagree	Disagree	Disagree	Disagree	Disagree	Disagree	Agree	Disagree				Disagree
504	37	Female	Unmarried	Bachelor	Intermediate	Governmental	Shenzhen Integrated Chinese and Western Medicine Hospital	Nurse	3	No	1-5	No	Yes	Yes	Yes	No	Not worried	Not worried	Not worried	Not worried	No	Yes	Yes	Yes	Yes	Once or twice	Never	Never	Not worried	Not worried	Not worried	Somewhat hesitant	Strongly Agree	Don’t Know	Strongly Agree	Strongly Agree	Yes	Disagree	Disagree	Disagree	Disagree	Disagree	Strongly Agree	Agree	Agree	Agree	Agree	Disagree	Agree
1316	37	Female	Unmarried	Bachelor	Intermediate	Governmental	Shenzhen Integrated Chinese and Western Medicine Hospital	Obstetrician and Gynecologist	2	No	0	Yes	Yes	Yes	No	No	A little worried	Worried	Worried	Not worried	No	No	No	No	Yes	Never	Never	Never	Not worried	Not worried	Not worried	A little hesitant	Agree	Yes	Strongly Agree	Strongly Agree	Don’t Know	Disagree	Strongly Disagree	Disagree	Disagree	Disagree	Agree	Agree	Disagree				Disagree
584	52	Male	Unmarried	Bachelor	Senior	Governmental	Shenzhen Integrated Chinese and Western Medicine Hospital	Doctor	4	Yes		No	Yes	Yes	Yes	No	A little worried	Very worried	Very worried	A little worried	Not applicable	Yes	Yes	Yes	No							Somewhat hesitant	Strongly Agree	Yes	Strongly Agree	Strongly Agree	Don’t Know	Agree	Agree	Agree	Strongly Agree	Agree	Strongly Agree	Strongly Agree	Agree	Agree	Agree	Disagree	Agree
458	42	Female	Unmarried	Diploma	Intermediate	Governmental	Shenzhen Integrated Chinese and Western Medicine Hospital	Nurse	4	No		No	No	No	No	Yes	Very worried	Very worried	Very worried	Not worried	Yes	Yes	Yes	Yes	Don’t know							Somewhat hesitant	Strongly Agree	Yes	Strongly Agree	Strongly Agree	Yes	Disagree	Disagree	Disagree	Agree	Disagree	Agree	Agree	Disagree				Agree
469	38	Female	Unmarried	Bachelor	Intermediate	Governmental	Shenzhen Integrated Chinese and Western Medicine Hospital	Nurse	3	No	1-5	No	Yes	Yes	No	No	Not worried	A little worried	A little worried	Not worried	Yes	Yes	Yes	Yes	Yes	Never	Never	Never	Not worried	Not worried	Not worried	A little hesitant	Strongly Agree	No	Strongly Agree	Strongly Agree	Yes	Strongly Agree	Disagree	Strongly Agree	Agree	Agree	Agree	Agree	Agree	Disagree	Agree	Agree	Disagree
624	51	Female	Divorced	Bachelor	Intermediate	Governmental	Shenzhen Integrated Chinese and Western Medicine Hospital	Doctor	4	No		Yes	Yes	Yes	Yes	No	Not worried	A little worried	A little worried	Not worried	No	No	No	Yes	Yes	Never	Never	Never	Not worried	Not worried	Not worried	Not hesitant	Strongly Agree	Yes	Strongly Agree	Strongly Agree	Yes	Disagree	Disagree	Disagree	Disagree	Disagree	Agree	Disagree	Disagree				Disagree
578	35	Male	Unmarried	Bachelor	Senior	Governmental	Shenzhen Integrated Chinese and Western Medicine Hospital	Doctor	3	No		Yes	Yes	Yes	No	No	Not worried	A little worried	A little worried	Not worried	No	Yes	Yes	Yes	Yes	Once or twice	Once or twice	Once or twice	Not worried	Not worried	Not worried	Not hesitant	Strongly Agree	Yes	Strongly Agree	Strongly Agree	Yes	Agree	Disagree	Agree	Agree	Disagree	Disagree	Agree	Disagree				Disagree
461	35	Female	Unmarried	Bachelor	Intermediate	Governmental	Shenzhen Integrated Chinese and Western Medicine Hospital	Nurse	3	No	0	No	Yes	Yes	No	No	A little worried	Very worried	Very worried	A little worried	Yes	Yes	Yes	Yes	Don’t know							Very hesitant	Agree	Yes	Strongly Agree	Strongly Agree	Yes	Agree	Agree	Disagree	Disagree	Disagree	Strongly Agree	Strongly Agree	Strongly Agree	Agree	Disagree	Agree	Agree
394	45	Male	Unmarried	High school or others	None	Governmental	Shenzhen Integrated Chinese and Western Medicine Hospital	Cleaning staff	4	No		No	No	No	No	Yes	Not applicable	Not applicable	Not applicable	Not applicable	Not applicable	Yes	Yes	Not applicable	Don’t know							A little hesitant	Disagree	Don’t Know	Disagree	Disagree	Don’t Know	Strongly Disagree	Strongly Disagree	Strongly Disagree	Strongly Disagree	Strongly Disagree	Strongly Disagree	Strongly Disagree	Strongly Disagree				Strongly Disagree
607	24	Male	Unmarried	Diploma	Primary	Governmental	Shenzhen Integrated Chinese and Western Medicine Hospital	Nurse	1	No	1-5	No	Yes	No	No	No	Not worried	Worried	A little worried	Not worried	Yes	No	Yes	Yes	Yes	Never	Never	Never	Not worried	Not worried	Not worried	A little hesitant	Disagree	Don’t Know	Strongly Agree	Strongly Agree	Don’t Know	Agree	Disagree	Disagree	Disagree	Disagree	Disagree	Disagree	Agree	Agree	Disagree	Disagree	Agree
590	41	Female	Unmarried	Bachelor	Intermediate	Governmental	Shenzhen Integrated Chinese and Western Medicine Hospital	Nurse	3	No		No	Yes	Yes	No	No	Not worried	A little worried	A little worried	Not worried	Yes	No	Yes	Yes	Yes	Never	Never	Never	A little worried	A little worried	A little worried	Somewhat hesitant	Agree	Yes	Strongly Agree	Strongly Agree	No	Strongly Agree	Disagree	Disagree	Disagree	Disagree	Agree	Agree	Agree	Agree	Agree	Disagree	Agree
611	57	Male	Unmarried	Master or higher	Senior	Governmental	Shenzhen Integrated Chinese and Western Medicine Hospital	Doctor	4	No	0	No	Yes	Yes	No	No	Not applicable	Not applicable	Not applicable	Not applicable	Not applicable	Not applicable	Yes	Not applicable	Don’t know							Somewhat hesitant	Strongly Agree	Don’t Know	Strongly Agree	Strongly Agree	Yes	Disagree	Disagree	Disagree	Disagree	Disagree	Agree	Strongly Agree	Disagree				Disagree
1001	35	Female	Unmarried	Bachelor	Intermediate	Governmental	Shenzhen Integrated Chinese and Western Medicine Hospital	Nursing worker	3	No		No	Yes	Yes	No	No	A little worried	A little worried	Very worried	Not worried	Yes	Yes	Yes	Yes	Don’t know							A little hesitant	Agree	Don’t Know	Strongly Agree	Strongly Agree	No	Strongly Disagree	Strongly Disagree	Strongly Disagree	Agree	Disagree	Agree	Agree	Disagree				Disagree
541	21	Female	Married	Bachelor	Intermediate	Governmental	Shenzhen Integrated Chinese and Western Medicine Hospital	Midwife	1	No	≥11	Yes	Yes	Yes	No	No	A little worried	Very worried	Very worried	Not worried	Yes	Yes	Yes	Yes	Yes	Never	Never	Never	A little worried	Very worried	Worried	A little hesitant	Agree	Yes	Strongly Agree	Strongly Agree	Don’t Know	Strongly Disagree	Strongly Disagree	Strongly Disagree	Strongly Disagree	Strongly Disagree	Strongly Agree	Strongly Agree	Agree	Agree	Disagree	Agree	Disagree
468	48	Female	Unmarried	Bachelor	Senior	Governmental	Shenzhen Integrated Chinese and Western Medicine Hospital	Nurse	4	No	0	No	Yes	Yes	No	No	Not worried	Not worried	Not worried	Not worried	No	Yes	Yes	Yes	Yes	Never	Never	Never	A little worried	A little worried	A little worried	Not hesitant	Strongly Agree	No	Strongly Agree	Strongly Agree	Yes	Agree	Disagree	Agree	Disagree	Disagree	Agree	Agree	Strongly Agree	Agree	Agree	Disagree	Agree
428	50	Male	Unmarried	Bachelor	Intermediate	Governmental	Shenzhen Integrated Chinese and Western Medicine Hospital	Anesthetist	4	Yes	1-5	Yes	Yes	Yes	No	No	A little worried	A little worried	A little worried	Not worried	No	Yes	Yes	Yes	Yes	Once or twice	Never	Never	Not worried	Not worried	Not worried	Not hesitant	Agree	Yes	Strongly Agree	Strongly Agree	Yes	Agree	Disagree	Disagree	Disagree	Disagree	Agree	Agree	Disagree				Disagree
487	36	Male	Unmarried	Bachelor	Intermediate	Governmental	Shenzhen Integrated Chinese and Western Medicine Hospital	Nurse	3	No		No	Yes	No	No	No	Not worried	A little worried	A little worried	Not worried	No	No	Yes	No	Yes	Never	Never	Never	Not worried	Not worried	Not worried	A little hesitant	Agree	Don’t Know	Disagree	Disagree	No	Agree	Disagree	Disagree	Strongly Disagree	Strongly Disagree	Agree	Agree	Strongly Agree	Agree	Agree	Disagree	Disagree
516	43	Female	Unmarried	Bachelor	Senior	Governmental	Shenzhen Integrated Chinese and Western Medicine Hospital	Nurse	4	No		No	Yes	Yes	Yes	No	Not worried	A little worried	Not worried	Not worried	No	Yes	Yes	Yes	Yes	Never	Never	Never	Not worried	Not worried	Not worried	A little hesitant	Strongly Agree	Yes	Strongly Agree	Strongly Agree	Yes	Strongly Agree	Disagree	Disagree	Disagree	Disagree	Agree	Strongly Agree	Disagree				Disagree
1007	29	Female	Married	Diploma	Intermediate	Governmental	Shenzhen Integrated Chinese and Western Medicine Hospital	Nurse	2	No	0	No	No	Yes	No	No	Not applicable	Not applicable	Not applicable	Not applicable	Not applicable	Not applicable	Not applicable	Not applicable	Don’t know							A little hesitant	Disagree	Don’t Know	Disagree	Disagree	Don’t Know	Strongly Disagree	Strongly Disagree	Strongly Disagree	Agree	Disagree	Agree	Agree	Disagree				Disagree
548	31	Female	Unmarried	Bachelor	Intermediate	Governmental	Shenzhen Integrated Chinese and Western Medicine Hospital	Doctor	3	No		Yes	Yes	Yes	Yes	No	Not applicable	A little worried	A little worried	Not worried	Not applicable	Yes	Yes	No	Don’t know							Not hesitant	Agree	No	Strongly Agree	Strongly Agree	Yes	Agree	Agree	Strongly Disagree	Strongly Disagree	Disagree	Agree	Agree	Disagree				Disagree
1038	40	Male	Unmarried	Bachelor	Senior	Governmental	Shenzhen Integrated Chinese and Western Medicine Hospital	Doctor	3	No		No	Yes	No	No	No	Not worried	Not worried	Not worried	Not worried	No	Yes	No	Yes	No							A little hesitant	Strongly Agree	No	Strongly Agree	Strongly Agree	Yes	Agree	Disagree	Disagree	Disagree	Disagree	Disagree	Agree	Disagree				Disagree
563	35	Male	Unmarried	Bachelor	Intermediate	Governmental	Shenzhen Integrated Chinese and Western Medicine Hospital	Pharmacist	2	Yes		No	No	No	No	Yes	Not applicable	Not applicable	Not applicable	Not applicable	Not applicable	Not applicable	Not applicable	Not applicable	Don’t know							Very hesitant	Disagree	Yes	Strongly Agree	Strongly Agree	Yes	Agree	Strongly Disagree	Agree	Strongly Disagree	Strongly Disagree	Strongly Disagree	Strongly Agree	Strongly Disagree				Strongly Disagree
543	29	Female	Unmarried	High school or others	None	Governmental	Shenzhen Integrated Chinese and Western Medicine Hospital	Cleaning staff	1	No		No	No	Yes	No	No	Not worried	A little worried	Not worried	Not worried	No	Yes	Yes	Yes	Don’t know							A little hesitant	Strongly Agree	Yes	Strongly Agree	Strongly Agree	Yes	Disagree	Disagree	Disagree	Disagree	Disagree	Agree	Agree	Disagree				Disagree
530	28	Female	Married	Bachelor	Primary	Governmental	Shenzhen Integrated Chinese and Western Medicine Hospital	Nurse	1	Yes	≥11	Yes	Yes	Yes	Yes	No	A little worried	Worried	A little worried	Not worried	No	Yes	Yes	Yes	Yes	Never	Never	Never	A little worried	A little worried	Not worried	Not hesitant	Strongly Agree	Don’t Know	Strongly Agree	Strongly Agree	Yes	Agree	Disagree	Disagree	Disagree	Disagree	Disagree	Agree	Disagree				Strongly Disagree
432	42	Female	Unmarried	Bachelor	Senior	Governmental	Shenzhen Integrated Chinese and Western Medicine Hospital	Midwife	4	Yes		Yes	Yes	Yes	Yes	No	Worried	Worried	Worried	Worried	Yes	Yes	Yes	Yes	Yes	Never	Never	Never	Not worried	Not worried	Not worried	Not hesitant	Strongly Agree	No	Strongly Agree	Strongly Agree	Yes	Disagree	Disagree	Disagree	Disagree	Disagree	Disagree	Agree	Disagree				Disagree
514	25	Female	Married	Diploma	Primary	Governmental	Shenzhen Integrated Chinese and Western Medicine Hospital	Nurse	2	Yes	1-5	Yes	Yes	Yes	Yes	No	Not worried	A little worried	A little worried	Not worried	No	No	Yes	Yes	Yes	Never	Never	Never	Not worried	Not worried	Not worried	Not hesitant	Strongly Agree	No	Strongly Agree	Strongly Agree	Yes	Agree	Disagree	Disagree	Disagree	Disagree	Disagree	Agree	Agree	Agree	Agree	Disagree	Disagree
673	29	Female	Married	Bachelor	Primary	Governmental	Shenzhen Integrated Chinese and Western Medicine Hospital	Medical /Laboratory Technician	2	No	0	Yes	Yes	Yes	Yes	No	Not applicable	Not applicable	Not applicable	Not applicable	Not applicable	Yes	Yes	Yes	Yes	Never	Never	Never	Not worried	Not worried	Not worried	A little hesitant	Strongly Agree	Don’t Know	Strongly Agree	Strongly Agree	Yes	Disagree	Disagree	Disagree	Agree	Agree	Disagree	Agree	Disagree				Disagree
449	48	Male	Unmarried	Master or higher	Senior	Governmental	Shenzhen Integrated Chinese and Western Medicine Hospital	Doctor	4	Yes	1-5	Yes	Yes	Yes	Yes	No	Not worried	A little worried	A little worried	Not worried	No	No	No	No	Yes	Never	Never	Never	Not worried	Not worried	Not worried	Not hesitant	Strongly Agree	Yes	Strongly Agree	Strongly Agree	Yes	Disagree	Disagree	Agree	Agree	Disagree	Agree	Agree	Disagree				Disagree
474	29	Female	Unmarried	Bachelor	Intermediate	Governmental	Shenzhen Integrated Chinese and Western Medicine Hospital	Nurse	2	No		No	Yes	Yes	No	No	Not worried	A little worried	A little worried	Not worried	No	Yes	No	Yes	Yes	Never	Never	Never	A little worried	Not worried	Not worried	A little hesitant	Agree	No	Strongly Agree	Strongly Agree	Don’t Know	Agree	Disagree	Agree	Agree	Agree	Strongly Agree	Strongly Agree	Strongly Agree	Agree	Agree	Agree	Disagree
577	31	Male	Unmarried	Diploma	Primary	Governmental	Shenzhen Integrated Chinese and Western Medicine Hospital	Nurse	2	No		No	Yes	No	No	No	A little worried	Very worried	Very worried	Not worried	No	Yes	Yes	Yes	Yes	Never	Never	Never	Not worried	Not worried	Not worried	A little hesitant	Disagree	Don’t Know	Strongly Agree	Strongly Agree	Don’t Know	Strongly Agree	Disagree	Strongly Disagree	Disagree	Disagree	Agree	Agree	Agree	Agree	Agree	Disagree	Agree
554	47	Male	Unmarried	Bachelor	Intermediate	Governmental	Shenzhen Integrated Chinese and Western Medicine Hospital	Doctor	3	No		Yes	Yes	Yes	Yes	No	Not worried	Worried	Worried	Not worried	No	Yes	Yes	Yes	Yes	Once or twice	Once or twice	Never	A little worried	A little worried	A little worried	A little hesitant	Agree	Yes	Strongly Agree	Strongly Agree	Yes	Disagree	Disagree	Disagree	Agree	Disagree	Agree	Agree	Agree	Agree	Disagree	Disagree	Agree
462	39	Female	Unmarried	Bachelor	Senior	Governmental	Shenzhen Integrated Chinese and Western Medicine Hospital	Nurse	4	No		Yes	Yes	Yes	Yes	No	Not worried	Worried	A little worried	A little worried	No	Yes	Yes	Yes	Yes	Never	Never	Never	Not worried	Not worried	Not worried	Not hesitant	Strongly Agree	Yes	Strongly Agree	Strongly Agree	Yes	Agree	Disagree	Agree	Agree	Disagree	Agree	Strongly Agree	Disagree				Disagree
448	33	Female	Unmarried	Bachelor	Intermediate	Governmental	Shenzhen Integrated Chinese and Western Medicine Hospital	Nurse	3	No	6-10	No	Yes	Yes	No	No	Not worried	A little worried	A little worried	Not worried	No	Yes	Yes	Yes	Don’t know							Somewhat hesitant	Strongly Agree	Yes	Strongly Agree	Strongly Agree	Yes	Agree	Agree	Disagree	Disagree	Disagree	Agree	Strongly Agree	Disagree				Disagree
505	52	Female	Unmarried	High school or others	None	Governmental	Shenzhen Integrated Chinese and Western Medicine Hospital	Cleaning staff	3	Yes	0	No	No	No	No	Yes	Not worried	A little worried	A little worried	A little worried	No	Yes	Yes	No	Don’t know							Very hesitant	Disagree	Don’t Know	Disagree	Disagree	Don’t Know	Agree	Strongly Disagree	Strongly Disagree	Agree	Agree	Agree	Agree	Strongly Agree	Disagree	Disagree	Agree	Agree
517	22	Female	Married	Diploma	None	Governmental	Shenzhen Integrated Chinese and Western Medicine Hospital	Nurse	1	No	1-5	No	Yes	Yes	No	No	Worried	Worried	Worried	Not worried	No	Yes	Yes	Yes	Yes	Never	Never	Never	Not worried	Not worried	Not worried	A little hesitant	Strongly Agree	Yes	Strongly Agree	Strongly Agree	Yes	Disagree	Strongly Disagree	Strongly Disagree	Strongly Disagree	Strongly Disagree	Disagree	Agree	Disagree				Strongly Disagree
522	35	Male	Unmarried	Diploma	None	Governmental	Shenzhen Integrated Chinese and Western Medicine Hospital	Cashier	1	No	0	No	Yes	Yes	No	No	Not worried	Not applicable	Not applicable	Not applicable	Yes	Not applicable	Not applicable	Not applicable	Don’t know							Very hesitant	Disagree	Don’t Know	Disagree	Strongly Agree	Don’t Know	Disagree	Disagree	Disagree	Disagree	Disagree	Agree	Agree	Disagree				Disagree
393	39	Male	Unmarried	Bachelor	Intermediate	Governmental	Shenzhen Integrated Chinese and Western Medicine Hospital	Cleaning staff	4	Yes		No	No	Yes	No	No	Not applicable	Not applicable	Not applicable	Not applicable	Not applicable	Not applicable	Not applicable	Not applicable	Yes	Once or twice	Once or twice	Once or twice	A little worried	A little worried	A little worried	A little hesitant	Strongly Agree	Yes	Disagree	Disagree	Don’t Know	Strongly Disagree	Strongly Agree	Strongly Disagree	Strongly Disagree	Strongly Disagree	Strongly Disagree	Agree	Strongly Disagree				Strongly Disagree
618	25	Female	Married	Bachelor	Primary	Governmental	Shenzhen Integrated Chinese and Western Medicine Hospital	Nurse	1	No	1-5	Yes	Yes	Yes	Yes	No	A little worried	Worried	Worried	Not worried	No	No	Not applicable	Yes	Don’t know							Not hesitant	Strongly Agree	Don’t Know	Strongly Agree	Strongly Agree	Don’t Know	Agree	Strongly Disagree	Strongly Disagree	Disagree	Disagree	Agree	Agree	Disagree				Disagree
515	37	Female	Unmarried	Diploma	None	Governmental	Shenzhen Integrated Chinese and Western Medicine Hospital	Cashier	2	No	0	No	No	No	No	Yes	A little worried	Very worried	Worried	A little worried	Yes	No	No	Yes	Don’t know							Somewhat hesitant	Disagree	Don’t Know	Strongly Agree	Strongly Agree	Don’t Know	Agree	Disagree	Disagree	Disagree	Disagree	Agree	Agree	Agree	Agree	Disagree	Agree	Agree
588	40	Female	Unmarried	Master or higher	Intermediate	Governmental	Shenzhen Integrated Chinese and Western Medicine Hospital	Medical /Laboratory Technician	3	No		Yes	Yes	Yes	Yes	No	Not worried	A little worried	A little worried	Not worried	No	Yes	Yes	No	Don’t know							A little hesitant	Agree	Yes	Strongly Agree	Strongly Agree	Yes	Disagree	Disagree	Disagree	Disagree	Disagree	Agree	Agree	Disagree				Disagree
413	30	Female	Married	Bachelor	Primary	Governmental	Shenzhen Integrated Chinese and Western Medicine Hospital	Nurse	2	No		Yes	Yes	Yes	Yes	No	Not worried	Worried	Worried	Not worried	No	Yes	Yes	Yes	No							A little hesitant	Disagree	Don’t Know	Strongly Agree	Disagree	Yes	Agree	Agree	Agree	Agree	Disagree	Agree	Agree	Disagree				Disagree
595	27	Female	Married	Bachelor	Primary	Governmental	Shenzhen Integrated Chinese and Western Medicine Hospital	Nurse	1	No	≥11	No	Yes	Yes	No	No	A little worried	A little worried	Worried	Not worried	No	Yes	Yes	No	Yes	Never	Never	Never	Not worried	Not worried	Not worried	Not hesitant	Disagree	Don’t Know	Strongly Agree	Strongly Agree	Don’t Know	Agree	Strongly Disagree	Strongly Disagree	Disagree	Disagree	Agree	Agree	Disagree				Disagree
621	24	Female	Unmarried	Diploma	None	Governmental	Shenzhen Integrated Chinese and Western Medicine Hospital	Nurse	1	No	0	No	Yes	Yes	No	No	A little worried	Very worried	Very worried	Not worried	No	Yes	Yes	Yes	Don’t know							Very hesitant	Strongly Agree	Don’t Know	Strongly Agree	Strongly Agree	Don’t Know	Agree	Disagree	Disagree	Disagree	Disagree	Agree	Strongly Agree	Disagree				Disagree
609	40	Female	Unmarried	Bachelor	Intermediate	Governmental	Shenzhen Integrated Chinese and Western Medicine Hospital	Nurse	3	No	1-5	No	Yes	No	No	No	Not worried	A little worried	A little worried	Not worried	No	Yes	Yes	Yes	Yes	Never	Never	Never	Not worried	Not worried	Not worried	Somewhat hesitant	Disagree	No	Strongly Agree	Strongly Agree	Don’t Know	Agree	Disagree	Agree	Agree	Disagree	Agree	Strongly Agree	Disagree				Disagree
1203	33	Female	Unmarried	Bachelor	Primary	Governmental	Shenzhen Integrated Chinese and Western Medicine Hospital	Nurse	3	No	0	No	Yes	No	No	No	A little worried	A little worried	A little worried	A little worried	Yes	Yes	Yes	Yes	Don’t know							A little hesitant	Strongly Agree	Yes	Strongly Agree	Strongly Agree	Don’t Know	Agree	Disagree	Disagree	Disagree	Disagree	Agree	Agree	Disagree				Disagree
603	44	Male	Divorced	Bachelor	Intermediate	Governmental	Shenzhen Integrated Chinese and Western Medicine Hospital	Doctor	3	No		Yes	Yes	Yes	Yes	No	A little worried	Not applicable	A little worried	Not worried	Yes	Yes	Yes	Yes	Yes	Once or twice	Never	Never	A little worried	Not worried	Not worried	A little hesitant	Strongly Agree	Yes	Strongly Agree	Strongly Agree	Yes	Agree	Disagree	Strongly Agree	Strongly Agree	Agree	Strongly Agree	Strongly Agree	Disagree				Disagree
523	45	Male	Unmarried	Master or higher	Senior	Governmental	Shenzhen Integrated Chinese and Western Medicine Hospital	Medical /Laboratory Technician	3	Yes	1-5	No	Yes	No	No	No	A little worried	A little worried	A little worried	A little worried	No	Yes	Yes	Yes	Yes	Once or twice	Never	Never	Not worried	Not worried	Not worried	Not hesitant	Agree	No	Strongly Agree	Strongly Agree	Yes	Agree	Disagree	Agree	Agree	Disagree	Agree	Agree	Disagree				Disagree
591	33	Female	Married	Master or higher	Intermediate	Governmental	Shenzhen Integrated Chinese and Western Medicine Hospital	Doctor	2	No	0	No	Yes	Yes	No	No	Not worried	Very worried	Very worried	Not worried	Yes	Yes	Yes	Yes	Yes	Once or twice	Never	Never	Not worried	Not worried	Not worried	A little hesitant	Disagree	Don’t Know	Strongly Agree	Strongly Agree	Don’t Know	Agree	Strongly Disagree	Disagree	Agree	Disagree	Strongly Agree	Strongly Agree	Agree	Disagree	Agree	Agree	Strongly Disagree
519	29	Male	Married	Bachelor	Primary	Governmental	Shenzhen Integrated Chinese and Western Medicine Hospital	Medical /Laboratory Technician	1	No		Yes	Yes	Yes	Yes	No	A little worried	A little worried	A little worried	Not worried	No	Yes	Yes	Yes	Don’t know							A little hesitant	Disagree	Don’t Know	Strongly Agree	Strongly Agree	Yes	Strongly Disagree	Agree	Agree	Agree	Agree	Strongly Agree	Strongly Agree	Disagree				Disagree
551	22	Female	Married	Diploma	Primary	Governmental	Shenzhen Integrated Chinese and Western Medicine Hospital	Nurse	1	No	1-5	No	Yes	Yes	No	No	Not worried	A little worried	Worried	Not worried	Not applicable	Yes	No	Yes	Don’t know							A little hesitant	Disagree	Don’t Know	Strongly Agree	Strongly Agree	No	Disagree	Disagree	Strongly Disagree	Disagree	Disagree	Disagree	Agree	Disagree				Disagree
500	45	Male	Unmarried	Bachelor	Senior	Governmental	Shenzhen Integrated Chinese and Western Medicine Hospital	Doctor	3	No	6-10	No	Yes	Yes	No	No	A little worried	A little worried	A little worried	Not worried	Not applicable	Yes	Yes	Yes	Yes	Never	Never	Never	A little worried	A little worried	Not worried	A little hesitant	Agree	Don’t Know	Strongly Agree	Strongly Agree	Yes	Disagree	Agree	Agree	Disagree	Disagree	Agree	Agree	Disagree				Disagree
592	21	Female	Married	Bachelor	None	Governmental	Shenzhen Integrated Chinese and Western Medicine Hospital	Nurse	1	No	0	Yes	Yes	Yes	Yes	No	A little worried	A little worried	A little worried	Not worried	Yes	Yes	Yes	Yes	Yes	Never	Never	Never	Not worried	Not worried	Not worried	A little hesitant	Strongly Agree	Yes	Strongly Agree	Strongly Agree	Yes	Strongly Agree	Strongly Disagree	Strongly Disagree	Strongly Disagree	Strongly Disagree	Strongly Disagree	Disagree	Strongly Disagree				Strongly Disagree
465	23	Female	Married	Diploma	None	Governmental	Shenzhen Integrated Chinese and Western Medicine Hospital	Medical Records Personnel	1	No		No	Yes	Yes	No	No	Not worried	A little worried	A little worried	Not worried	No	Yes	Yes	Yes	Don’t know							A little hesitant	Disagree	Don’t Know	Strongly Agree	Disagree	Don’t Know	Disagree	Disagree	Agree	Disagree	Disagree	Agree	Agree	Strongly Disagree				Agree
540	37	Female	Married	Bachelor	Intermediate	Governmental	Shenzhen Integrated Chinese and Western Medicine Hospital	Doctor	3	No		No	Yes	Yes	Yes	No	A little worried	Worried	Very worried	Not worried	No	Yes	Yes	Yes	Don’t know							Somewhat hesitant	Strongly Agree	Don’t Know	Disagree	Strongly Agree	Don’t Know	Agree	Disagree	Agree	Agree	Agree	Agree	Agree	Disagree				Disagree
905	27	Female	Married	Master or higher	Primary	Governmental	Shenzhen Integrated Chinese and Western Medicine Hospital	Doctor	1	No		Yes	Yes	Yes	No	No	Worried	Worried	Worried	Not worried	Yes	No	Yes	Yes	Don’t know							A little hesitant	Strongly Agree	Don’t Know	Strongly Agree	Strongly Agree	Don’t Know	Agree	Disagree	Strongly Disagree	Disagree	Strongly Disagree	Agree	Disagree	Disagree				Disagree
580	17	Male	Married	Diploma	None	Governmental	Shenzhen Integrated Chinese and Western Medicine Hospital	Pharmacist	1	No		No	No	No	No	Yes	Not applicable	Not applicable	Not applicable	Not applicable	No	No	Not applicable	Not applicable	Don’t know							Not hesitant	Disagree	Don’t Know	Disagree	Disagree	Don’t Know	Agree	Strongly Disagree	Strongly Disagree	Agree	Strongly Disagree	Disagree	Agree	Disagree				Strongly Disagree
344	44	Female	Unmarried	Diploma	Intermediate	Governmental	Shenzhen Integrated Chinese and Western Medicine Hospital	Nurse	4	No		Yes	Yes	Yes	Yes	No	Worried	Very worried	A little worried	Not worried	No	Not applicable	Yes	Yes	Yes	Never	Never	Never	A little worried	A little worried	A little worried	Somewhat hesitant	Agree	No	Strongly Agree	Strongly Agree	Yes	Agree	Agree	Agree	Agree	Agree	Disagree	Agree	Disagree				Disagree
897	29	Female	Married	Diploma	Primary	Governmental	Shenzhen Integrated Chinese and Western Medicine Hospital	Nurse	2	No	1-5	No	No	Yes	No	No	Not worried	Very worried	Very worried	Not worried	No	Not applicable	No	Yes	Yes	Several times	Never	Several times	Not worried	A little worried	A little worried	Not hesitant	Strongly Agree	Yes	Disagree	Disagree	Don’t Know	Disagree	Strongly Disagree	Strongly Disagree	Strongly Disagree	Strongly Disagree	Strongly Disagree	Strongly Disagree	Agree	Disagree	Disagree	Agree	Strongly Disagree
506	34	Female	Unmarried	Diploma	None	Governmental	Shenzhen Integrated Chinese and Western Medicine Hospital	Cleaning staff	1	No		Yes	Yes	No	No	No	Not worried	Worried	Not applicable	Not worried	No	Yes	Yes	No	Don’t know							A little hesitant	Disagree	Don’t Know	Strongly Agree	Strongly Agree	Don’t Know	Strongly Disagree	Disagree	Strongly Disagree	Disagree	Disagree	Agree	Agree	Disagree				Disagree
625	45	Female	Unmarried	Diploma	Intermediate	Governmental	Shenzhen Integrated Chinese and Western Medicine Hospital	Nurse	4	No	0	Yes	Yes	Yes	No	No	A little worried	Very worried	Worried	A little worried	Yes	Yes	No	Yes	Don’t know							Somewhat hesitant	Agree	Don’t Know	Strongly Agree	Strongly Agree	Don’t Know	Strongly Disagree	Agree	Disagree	Disagree	Agree	Agree	Strongly Agree	Strongly Agree	Agree	Agree	Agree	Agree
555	37	Female	Unmarried	Bachelor	Intermediate	Governmental	Shenzhen Integrated Chinese and Western Medicine Hospital	Nurse	3	No		No	Yes	Yes	No	No	A little worried	A little worried	A little worried	A little worried	Yes	Yes	Yes	Yes	Don’t know							Very hesitant	Strongly Agree	Yes	Strongly Agree	Strongly Agree	Don’t Know	Agree	Disagree	Agree	Agree	Agree	Agree	Agree	Disagree				Disagree
442	37	Female	Married	Bachelor	Intermediate	Governmental	Shenzhen Integrated Chinese and Western Medicine Hospital	Anesthetist	3	Yes	1-5	Yes	Yes	Yes	No	No	Not worried	A little worried	A little worried	Not worried	Yes	Yes	Yes	Yes	Yes	Never	Never	Never	Not worried	Not worried	Not worried	A little hesitant	Agree	Don’t Know	Strongly Agree	Strongly Agree	Yes	Strongly Agree	Agree	Agree	Strongly Agree	Agree	Agree	Strongly Agree	Disagree				Disagree
533	39	Male	Unmarried	Diploma	Intermediate	Governmental	Shenzhen Integrated Chinese and Western Medicine Hospital	Medical /Laboratory Technician	3	No		No	Yes	Yes	No	No	Not worried	Not applicable	Not applicable	Not applicable	Yes	Yes	Yes	Yes	Yes	Never	Never	Never	Not worried	A little worried	Not worried	A little hesitant	Disagree	Don’t Know	Strongly Agree	Strongly Agree	Don’t Know	Disagree	Agree	Agree	Agree	Agree	Agree	Disagree	Disagree				Disagree
614	29	Female	Unmarried	Bachelor	Primary	Governmental	Shenzhen Integrated Chinese and Western Medicine Hospital	Obstetrician and Gynecologist	1	Yes	0	Yes	Yes	Yes	Yes	No	A little worried	Worried	Worried	Not worried	No	Yes	No	Yes	No							A little hesitant	Strongly Agree	Yes	Strongly Agree	Strongly Agree	Yes	Disagree	Disagree	Disagree	Agree	Disagree	Disagree	Strongly Agree	Disagree				Disagree
1302	40	Female	Unmarried	High school or others	Intermediate	Private	Shenzhen Yongfu Hospital	Nurse	3	No		Yes	Yes	Yes	Yes	No	Not worried	A little worried	A little worried	Not worried	No	Yes	No	Yes	Don’t know							Not hesitant	Strongly Agree	No	Strongly Agree	Strongly Agree	Yes	Disagree	Disagree	Disagree	Disagree	Disagree	Disagree	Disagree	Disagree				Disagree
896	25	Female	Unmarried	Diploma	Primary	Private	Shenzhen Yongfu Hospital	Nurse	2	No		No	Yes	Yes	Yes	No	Worried	Very worried	Worried	Worried	No	Yes	Yes	Yes	Yes	Once or twice	Never	Never	Worried	Worried	Worried	Somewhat hesitant	Agree	Don’t Know	Strongly Agree	Strongly Agree	Yes	Agree	Disagree	Disagree	Disagree	Disagree	Disagree	Agree	Disagree				Agree
1338	46	Female	Unmarried	Bachelor	Intermediate	Private	Shenzhen Yongfu Hospital	Doctor	4	No		No	Yes	Yes	No	No	Not applicable	Not applicable	Not applicable	Not applicable	No	Yes	Yes	Yes	Don’t know							Somewhat hesitant	Strongly Agree	Don’t Know	Strongly Agree	Strongly Agree	Don’t Know	Disagree	Disagree	Disagree	Disagree	Disagree	Agree	Agree	Strongly Disagree				Strongly Disagree
1286	24	Female	Married	High school or others	None	Private	Shenzhen Yongfu Hospital	Nurse	1	No	1-5	No	Yes	Yes	No	No	A little worried	Worried	A little worried	Not worried	No	No	No	Yes	Yes	Never	Never	Never	Not worried	Not worried	Not worried	Not hesitant	Strongly Agree	Don’t Know	Strongly Agree	Disagree	Don’t Know	Agree	Agree	Agree	Agree	Disagree	Agree	Agree	Disagree				Disagree
742	32	Female	Married	Diploma	Primary	Private	Shenzhen Yongfu Hospital	Pharmacist	2	No	0	Yes	Yes	Yes	Yes	No	A little worried	Very worried	Very worried	Not worried	Yes	Yes	Yes	Yes	Don’t know							Not hesitant	Disagree	Don’t Know	Disagree	Strongly Agree	No	Agree	Disagree	Agree	Agree	Disagree	Agree	Disagree	Disagree				Disagree
829	42	Female	Unmarried	Bachelor	Intermediate	Private	Shenzhen Yongfu Hospital	Obstetrician and Gynecologist	3	No		No	Yes	Yes	No	No	Not worried	Very worried	Very worried	Not worried	No	No	Yes	Yes	Don’t know							Somewhat hesitant	Agree	Yes	Strongly Agree	Strongly Agree	Yes	Agree	Disagree	Agree	Disagree	Disagree	Strongly Agree	Agree	Disagree				Disagree
31	22	Female	Married	Diploma	Primary	Private	Shenzhen Yongfu Hospital	Midwife	1	No		Yes	Yes	Yes	Yes	No	A little worried	Worried	A little worried	Not worried	No	No	Yes	Yes	Don’t know							A little hesitant	Strongly Agree	Yes	Strongly Agree	Strongly Agree	Don’t Know	Disagree	Disagree	Disagree	Disagree	Disagree	Agree	Agree	Disagree				Disagree
1229	23	Female	Married	High school or others	Primary	Private	Shenzhen Yongfu Hospital	Receptionist	1	No		No	No	No	No	Yes	Not applicable	Not applicable	Not applicable	Not applicable	Not applicable	Not applicable	Not applicable	Not applicable	No							Somewhat hesitant	Disagree	No	Disagree	Strongly Agree	Don’t Know	Strongly Disagree	Strongly Disagree	Agree	Strongly Disagree	Strongly Disagree	Agree	Agree	Strongly Disagree				Strongly Disagree
1307	22	Female	Married	Diploma	Primary	Private	Shenzhen Yongfu Hospital	Nurse	1	No		No	Yes	Yes	No	No	Worried	Worried	Worried	Not applicable	No	Yes	Yes	Yes	Yes	Once or twice	Never	Never	Not worried	Worried	Worried	Somewhat hesitant	Strongly Agree	Don’t Know	Strongly Agree	Strongly Agree	Yes	Agree	Disagree	Agree	Agree	Agree	Agree	Agree	Disagree				Disagree
726	26	Female	Married	Diploma	Primary	Private	Shenzhen Yongfu Hospital	Nurse	1	No		No	Yes	Yes	No	No	Not worried	Not applicable	Not applicable	Not worried	Not applicable	No	No	Not applicable	Don’t know							Not hesitant	Agree	No	Strongly Agree	Strongly Agree	Yes	Disagree	Strongly Disagree	Disagree	Disagree	Disagree	Agree	Disagree	Disagree				Disagree
612	38	Female	Unmarried	Bachelor	Intermediate	Private	Shenzhen Yongfu Hospital	Obstetrician and Gynecologist	3	No		Yes	Yes	Yes	Yes	No	A little worried	A little worried	A little worried	Not worried	No	No	No	Yes	No							Not hesitant	Strongly Agree	No	Strongly Agree	Strongly Agree	No	Agree	Disagree	Disagree	Disagree	Disagree	Agree	Agree	Disagree				Disagree
947	58	Female	Unmarried	Diploma	Intermediate	Private	Shenzhen Yongfu Hospital	Obstetrician and Gynecologist	4	No		No	Yes	Yes	No	No	Not worried	A little worried	Worried	Not worried	No	Yes	No	No	No							Not hesitant	Strongly Agree	Don’t Know	Strongly Agree	Strongly Agree	Yes	Disagree	Disagree	Disagree	Disagree	Disagree	Agree	Agree	Disagree				Disagree
155	24	Female	Married	Diploma	Primary	Governmental	Shenzhen Yongfu Hospital	Nurse	1	No		No	Yes	Yes	No	No	Not worried	A little worried	Worried	Not worried	Not applicable	Not applicable	Not applicable	Not applicable	Don’t know							A little hesitant	Disagree	No	Strongly Agree	Strongly Agree	No	Disagree	Disagree	Disagree	Disagree	Disagree	Agree	Disagree	Disagree				Disagree
666	21	Female	Married	High school or others	Primary	Private	Shenzhen Yongfu Hospital	Receptionist	1	No		No	No	No	No	Yes	Not applicable	Not applicable	Very worried	Not applicable	Not applicable	Yes	No	Yes	No							Somewhat hesitant	Agree	Don’t Know	Disagree	Disagree	Don’t Know	Agree	Disagree	Disagree	Agree	Disagree	Disagree	Disagree	Disagree				Disagree
298	36	Female	Unmarried	High school or others	None	Private	Shenzhen Yongfu Hospital	Receptionist	1	No		Yes	Yes	Yes	No	No	Not applicable	Not applicable	Not applicable	Not applicable	Not applicable	Not applicable	Not applicable	Not applicable	Don’t know							Very hesitant	Agree	Don’t Know	Strongly Agree	Strongly Agree	Don’t Know	Strongly Disagree	Disagree	Disagree	Agree	Agree	Agree	Agree	Agree	Disagree	Agree	Disagree	Disagree
254	21	Female	Married	High school or others	None	Private	Shenzhen Yongfu Hospital	Cashier	1	No		No	No	No	No	Yes	Not applicable	Not applicable	Not applicable	Not applicable	Not applicable	Not applicable	Not applicable	Not applicable	Don’t know							Somewhat hesitant	Disagree	No	Disagree	Disagree	Don’t Know	Agree	Disagree	Disagree	Disagree	Disagree	Agree	Strongly Agree	Disagree				Disagree
766	29	Female	Unmarried	High school or others	None	Private	Shenzhen Yongfu Hospital	Receptionist	1	No		No	Yes	No	No	No	Not applicable	Not applicable	Not applicable	Not applicable	Not applicable	Not applicable	Not applicable	Not applicable	Don’t know							Somewhat hesitant	Disagree	Don’t Know	Strongly Agree	Strongly Agree	Don’t Know	Disagree	Disagree	Disagree	Agree	Disagree	Disagree	Agree	Agree	Agree	Agree	Disagree	Disagree
723	39	Male	Unmarried	Bachelor	Intermediate	Private	Shenzhen Yongfu Hospital	Doctor	3	No		No	Yes	Yes	No	No	Not worried	A little worried	Worried	Not worried	No	No	No	No	Don’t know							Not hesitant	Agree	Yes	Strongly Agree	Strongly Agree	Yes	Disagree	Agree	Disagree	Disagree	Disagree	Agree	Strongly Agree	Disagree				Disagree
1291	24	Female	Married	Diploma	Primary	Private	Shenzhen Yongfu Hospital	Nurse	1	No		Yes	Yes	Yes	No	No	Not worried	Not applicable	Not applicable	Not worried	No	Yes	Yes	Yes	No							Not hesitant	Disagree	Don’t Know	Disagree	Strongly Agree	Yes	Disagree	Disagree	Agree	Disagree	Disagree	Agree	Agree	Agree	Disagree	Disagree	Agree	Disagree
1227	52	Male	Unmarried	Diploma	Intermediate	Private	Shenzhen Yongfu Hospital	Doctor	4	No		No	Yes	No	No	No	Not worried	Very worried	Worried	Not worried	No	No	No	No	No							Somewhat hesitant	Strongly Agree	No	Agree	Strongly Agree	No	Strongly Disagree	Agree	Strongly Disagree	Agree	Agree	Agree	Disagree	Disagree				Disagree
725	22	Female	Married	High school or others	Primary	Private	Shenzhen Yongfu Hospital	Nurse	1	No		No	Yes	Yes	No	No	Not applicable	A little worried	A little worried	Not applicable	No	No	No	No	Don’t know							Not hesitant	Agree	No	Strongly Agree	Strongly Agree	Don’t Know	Disagree	Disagree	Disagree	Disagree	Disagree	Agree	Agree	Disagree				Disagree
760	34	Male	Married	Diploma	Primary	Private	Shenzhen Yongfu Hospital	Medical /Laboratory Technician	3	No	1-5	Yes	Yes	Yes	No	No	A little worried	Not worried	A little worried	Not worried	Yes	Yes	Yes	Yes	Yes	Never	Never	Never	Not worried	Not worried	Not worried	Not hesitant	Agree	No	Strongly Agree	Strongly Agree	Yes	Disagree	Agree	Disagree	Disagree	Strongly Disagree	Strongly Disagree	Strongly Disagree	Strongly Disagree				Strongly Disagree
634	40	Female	Unmarried	Bachelor	Intermediate	Private	Shenzhen Yongfu Hospital	Nurse	3	No		No	Yes	No	No	No	Not worried	A little worried	A little worried	Not worried	Yes	Yes	Yes	Yes	Yes	Once or twice	Never	Never	A little worried	Not worried	Not worried	A little hesitant	Agree	No	Strongly Agree	Strongly Agree	Don’t Know	Disagree	Disagree	Disagree	Disagree	Disagree	Disagree	Agree	Disagree				Disagree
1296	27	Female	Married	Diploma	Primary	Private	Shenzhen Yongfu Hospital	Nurse	1	No	0	No	Yes	No	No	No	Very worried	Very worried	Very worried	Worried	Yes	Yes	Yes	Yes	No							Somewhat hesitant	Disagree	Yes	Strongly Agree	Disagree	Don’t Know	Agree	Disagree	Strongly Agree	Agree	Disagree	Strongly Agree	Strongly Agree	Strongly Agree	Agree	Agree	Agree	Agree
1276	28	Female	Unmarried	Diploma	Primary	Private	Shenzhen Yongfu Hospital	Nurse	2	No		Yes	Yes	Yes	No	No	Not worried	A little worried	A little worried	Not worried	No	No	No	Not applicable	No							A little hesitant	Agree	Yes	Strongly Agree	Strongly Agree	Don’t Know	Disagree	Disagree	Disagree	Disagree	Disagree	Strongly Agree	Strongly Agree	Disagree				Disagree
676	49	Male	Divorced	Diploma	Primary	Private	Shenzhen Yongfu Hospital	Doctor	4	No		No	No	Yes	No	No	Not applicable	Not applicable	Not applicable	Not applicable	Not applicable	Yes	No	Not applicable	Don’t know							A little hesitant	Agree	Don’t Know	Agree	Disagree	Don’t Know	Strongly Disagree	Strongly Disagree	Strongly Disagree	Strongly Disagree	Strongly Disagree	Strongly Disagree	Agree	Strongly Disagree				Strongly Disagree
128	31	Female	Unmarried	Bachelor	Intermediate	Private	Shenzhen Yongfu Hospital	Midwife	3	No		No	Yes	Yes	Yes	No	A little worried	Very worried	A little worried	Not worried	No	Yes	No	Yes	No							A little hesitant	Agree	Yes	Strongly Agree	Strongly Agree	Yes	Agree	Disagree	Agree	Disagree	Disagree	Agree	Strongly Agree	Agree	Agree	Agree	Disagree	Disagree
513	25	Female	Married	High school or others	Primary	Private	Shenzhen Yongfu Hospital	Midwife	1	No		No	Yes	Yes	No	No	Not worried	A little worried	Worried	Not worried	Not applicable	No	Yes	Not applicable	Don’t know							A little hesitant	Agree	Don’t Know	Strongly Agree	Strongly Agree	Yes	Disagree	Disagree	Disagree	Disagree	Disagree	Disagree	Agree	Disagree				Disagree
917	65	Male	Unmarried	Bachelor	Senior	Private	Shenzhen Yongfu Hospital	Dentist	4	No		No	Yes	Yes	No	No	Worried	Worried	Worried	Not worried	Yes	Yes	Yes	Yes	Don’t know							Somewhat hesitant	Strongly Agree	Yes	Strongly Agree	Strongly Agree	Don’t Know	Disagree	Agree	Strongly Disagree	Disagree	Agree	Agree	Agree	Agree	Agree	Disagree	Disagree	Agree
864	24	Female	Married	Diploma	Primary	Private	Shenzhen Yongfu Hospital	Receptionist	1	No		Yes	Yes	No	No	No	Not worried	A little worried	Worried	Not worried	Not applicable	Not applicable	Not applicable	Not applicable	Don’t know							A little hesitant	Disagree	Don’t Know	Strongly Agree	Strongly Agree	Don’t Know	Disagree	Disagree	Disagree	Disagree	Disagree	Disagree	Disagree	Disagree				Disagree
667	66	Male	Unmarried	High school or others	Senior	Private	Shenzhen Yongfu Hospital	Doctor	4	No		Yes	Yes	Yes	Yes	No	Not applicable	A little worried	Worried	Not worried	Not applicable	Yes	Yes	Yes	Don’t know							A little hesitant	Agree	Don’t Know	Strongly Agree	Strongly Agree	Don’t Know	Agree	Disagree	Agree	Disagree	Agree	Disagree	Agree	Strongly Disagree				Strongly Disagree
105	30	Female	Married	Diploma	Primary	Private	Shenzhen Yongfu Hospital	Nurse	2	No		No	Yes	Yes	No	No	Not worried	A little worried	Worried	Not worried	Not applicable	No	Not applicable	No	Don’t know							A little hesitant	Disagree	Don’t Know	Strongly Agree	Strongly Agree	Don’t Know	Agree	Disagree	Disagree	Disagree	Disagree	Disagree	Disagree	Disagree				Disagree
168	56	Male	Unmarried	Diploma	Senior	Private	Shenzhen Yongfu Hospital	Anesthetist	4	No	1-5	No	Yes	No	No	No	Very worried	A little worried	Very worried	Not worried	No	No	No	Not applicable	Yes	Once or twice	Never	Never	Not worried	A little worried	Not worried	A little hesitant	Disagree	Yes	Disagree	Strongly Agree	Yes	Disagree	Strongly Disagree	Disagree	Disagree	Disagree	Agree	Disagree	Agree	Disagree	Disagree	Agree	Agree
1299	27	Female	Married	Bachelor	Primary	Private	Shenzhen Yongfu Hospital	Doctor	1	No		No	Yes	Yes	No	No	Not worried	A little worried	Not applicable	Not worried	Yes	No	Yes	Yes	Yes	Never	Never	Never	Not worried	Not worried	Not worried	Not hesitant	Agree	No	Strongly Agree	Strongly Agree	Don’t Know	Agree	Disagree	Disagree	Disagree	Disagree	Agree	Agree	Disagree				Disagree
832	19	Female	Married	High school or others	None	Private	Shenzhen Yongfu Hospital	Cashier	1	No	0	Yes	Yes	No	No	No	A little worried	A little worried	A little worried	Not worried	No	No	No	No	Don’t know							A little hesitant	Disagree	Don’t Know	Disagree	Disagree	Don’t Know	Disagree	Disagree	Disagree	Disagree	Disagree	Disagree	Disagree	Agree	Disagree	Disagree	Agree	Agree
1294	37	Female	Unmarried	Diploma	Primary	Private	Shenzhen Yongfu Hospital	Medical /Laboratory Technician	3	No		No	Yes	No	No	No	Not worried	A little worried	A little worried	Not worried	Not applicable	Yes	No	Not applicable	Don’t know							A little hesitant	Agree	Don’t Know	Disagree	Disagree	Don’t Know	Disagree	Disagree	Disagree	Disagree	Disagree	Disagree	Disagree	Disagree				Disagree
1266	55	Male	Unmarried	Diploma	Intermediate	Private	Shenzhen Yongfu Hospital	Medical /Laboratory Technician	4	No		No	Yes	No	No	No	A little worried	A little worried	A little worried	Not worried	Yes	Yes	Yes	Yes	Don’t know							A little hesitant	Disagree	Don’t Know	Disagree	Strongly Agree	Yes	Disagree	Disagree	Strongly Disagree	Disagree	Disagree	Strongly Agree	Strongly Agree	Agree	Disagree	Disagree	Agree	Disagree
1321	29	Female	Unmarried	Bachelor	Intermediate	Private	Shenzhen Yongfu Hospital	Nurse	2	No		No	Yes	Yes	Yes	No	Not applicable	Not applicable	Not applicable	Not applicable	Not applicable	Not applicable	Not applicable	Not applicable	Yes	Never	Never	Never	Not worried	Not worried	Not worried	Not hesitant	Strongly Agree	Don’t Know	Strongly Agree	Strongly Agree	Don’t Know	Disagree	Disagree	Agree	Disagree	Disagree	Agree	Agree	Disagree				Disagree
1284	24	Female	Married	High school or others	Primary	Private	Shenzhen Yongfu Hospital	Nurse	1	No		No	Yes	No	No	No	A little worried	A little worried	A little worried	Not worried	Not applicable	Yes	Yes	Not applicable	Don’t know							Somewhat hesitant	Agree	Don’t Know	Disagree	Disagree	Don’t Know	Agree	Agree	Agree	Strongly Disagree	Agree	Agree	Agree	Disagree				Disagree
1168	25	Female	Married	Diploma	None	Private	Shenzhen Yongfu Hospital	Nurse	1	No		No	No	No	No	Yes	A little worried	Very worried	Very worried	A little worried	Yes	Yes	Yes	Yes	Don’t know							Somewhat hesitant	Strongly Agree	Don’t Know	Strongly Agree	Strongly Agree	Yes	Agree	Disagree	Disagree	Disagree	Disagree	Agree	Agree	Strongly Agree	Agree	Agree	Disagree	Disagree
1231	56	Female	Unmarried	Diploma	Intermediate	Private	Shenzhen Yongfu Hospital	Obstetrician and Gynecologist	4	No		No	Yes	Yes	No	No	Not worried	A little worried	A little worried	Not worried	No	No	No	No	Don’t know							A little hesitant	Agree	Don’t Know	Strongly Agree	Strongly Agree	Don’t Know	Disagree	Disagree	Disagree	Disagree	Disagree	Disagree	Disagree	Disagree				Disagree
83	30	Male	Married	Diploma	Intermediate	Private	Shenzhen Yongfu Hospital	Nursing worker	2	No		Yes	No	No	No	No	A little worried	A little worried	A little worried	A little worried	No	No	No	No	No							A little hesitant	Disagree	Don’t Know	Disagree	Disagree	Don’t Know	Strongly Disagree	Strongly Disagree	Strongly Disagree	Strongly Disagree	Strongly Disagree	Strongly Disagree	Strongly Disagree	Strongly Disagree				Strongly Disagree
734	19	Female	Married	Diploma	None	Private	Shenzhen Yongfu Hospital	Cashier	1	No		No	No	No	No	Yes	Worried	A little worried	A little worried	A little worried	Yes	Yes	Yes	Yes	Don’t know							Somewhat hesitant	Agree	No	Agree	Disagree	Don’t Know	Disagree	Disagree	Disagree	Agree	Disagree	Agree	Agree	Disagree				Disagree
1358	20	Female	Married	Diploma	Primary	Private	Shenzhen Yongfu Hospital	Medical /Laboratory Technician	1	No		No	Yes	No	No	No	Not worried	A little worried	A little worried	Not worried	Yes	Not applicable	No	Not applicable	Don’t know							A little hesitant	Agree	Don’t Know	Disagree	Disagree	Don’t Know	Agree	Disagree	Disagree	Disagree	Disagree	Agree	Agree	Disagree				Disagree
471	30	Female	Married	Bachelor	Primary	Private	Shenzhen Yongfu Hospital	Doctor	2	No		Yes	Yes	Yes	Yes	No	Not worried	Worried	A little worried	Not worried	No	No	No	Not applicable	Yes	Never	Never	Never	Not worried	Not worried	Not worried	Not hesitant	Strongly Agree	Don’t Know	Disagree	Strongly Agree	Don’t Know	Disagree	Strongly Disagree	Disagree	Disagree	Disagree	Agree	Disagree	Disagree				Disagree
1295	26	Female	Unmarried	Diploma	Primary	Private	Shenzhen Yongfu Hospital	Nurse	1	No		No	Yes	Yes	Yes	No	Worried	Worried	Worried	Worried	Yes	Yes	Yes	Yes	No							Somewhat hesitant	Disagree	Don’t Know	Disagree	Disagree	Yes	Disagree	Strongly Agree	Strongly Agree	Agree	Agree	Agree	Agree	Agree	Agree	Agree	Agree	Agree
909	36	Female	Unmarried	Diploma	Intermediate	Private	Shenzhen Yongfu Hospital	Nurse	3	No		No	Yes	Yes	No	No	Not applicable	Not applicable	Not applicable	Not applicable	Not applicable	Not applicable	Not applicable	Not applicable	Don’t know							A little hesitant	Disagree	Don’t Know	Strongly Agree	Strongly Agree	Don’t Know	Agree	Disagree	Disagree	Disagree	Disagree	Disagree	Agree	Disagree				Disagree
269	26	Female	Married	Diploma	Primary	Private	Shenzhen Yongfu Hospital	Nurse	2	No	1-5	No	Yes	Yes	No	No	A little worried	Very worried	Very worried	A little worried	Yes	Yes	Yes	Yes	Yes	Never	Never	Never	Not worried	Not worried	Not worried	Not hesitant	Strongly Agree	No	Strongly Agree	Strongly Agree	Don’t Know	Strongly Disagree	Disagree	Disagree	Disagree	Disagree	Agree	Agree	Strongly Disagree				Strongly Disagree
1228	30	Female	Unmarried	Diploma	None	Private	Shenzhen Yongfu Hospital	Cashier	2	No	0	No	No	No	No	Yes	Very worried	Very worried	Not applicable	Not worried	Yes	Yes	Yes	Yes	Don’t know							Very hesitant	Disagree	Don’t Know	Disagree	Disagree	Don’t Know	Strongly Disagree	Strongly Agree	Strongly Agree	Strongly Agree	Strongly Disagree	Strongly Agree	Strongly Agree	Strongly Agree	Agree	Agree	Agree	Strongly Disagree
267	38	Male	Unmarried	Bachelor	None	Governmental	Baoan Songgang People's Hospital	Cleaning staff	1	No		No	No	No	No	Yes	Not worried	Not applicable	Not applicable	Not worried	Not applicable	Not applicable	Not applicable	Not applicable	Don’t know							Somewhat hesitant	Disagree	Don’t Know	Disagree	Disagree	Don’t Know	Strongly Agree	Disagree	Disagree	Agree	Strongly Agree	Strongly Agree	Strongly Agree	Disagree				Disagree
546	33	Female	Unmarried	Bachelor	Intermediate	Governmental	Baoan Songgang People's Hospital	Nurse	3	No		No	Yes	Yes	No	No	Not worried	A little worried	A little worried	Not worried	No	No	Yes	No	Don’t know							A little hesitant	Strongly Agree	No	Strongly Agree	Strongly Agree	Yes	Agree	Disagree	Disagree	Agree	Disagree	Disagree	Agree	Disagree				Disagree
1293	39	Female	Unmarried	Bachelor	Intermediate	Governmental	Baoan Songgang People's Hospital	Nurse	4	No		No	Yes	No	No	No	Not applicable	Not applicable	Not applicable	Not applicable	Not applicable	Yes	Yes	Yes	Don’t know							Very hesitant	Strongly Agree	Don’t Know	Strongly Agree	Strongly Agree	Don’t Know	Disagree	Disagree	Disagree	Agree	Disagree	Strongly Agree	Strongly Agree	Disagree				Disagree
174	33	Female	Unmarried	Bachelor	Intermediate	Governmental	Baoan Songgang People's Hospital	Medical /Laboratory Technician	2	No		No	Yes	No	No	No	Not worried	Not applicable	Not applicable	Not applicable	No	Not applicable	Not applicable	Not applicable	Don’t know							A little hesitant	Disagree	Don’t Know	Disagree	Strongly Agree	Don’t Know	Disagree	Strongly Disagree	Disagree	Strongly Disagree	Disagree	Disagree	Agree	Disagree				Disagree
191	22	Female	Married	Diploma	None	Governmental	Baoan Songgang People's Hospital	Receptionist	1	No	1-5	Yes	Yes	Yes	Yes	No	A little worried	A little worried	A little worried	Not worried	No	Yes	Yes	Yes	Don’t know							Not hesitant	Disagree	Yes	Strongly Agree	Strongly Agree	Yes	Disagree	Strongly Disagree	Disagree	Disagree	Strongly Disagree	Disagree	Disagree	Disagree				Disagree
1235	37	Female	Unmarried	Bachelor	Intermediate	Governmental	Baoan Songgang People's Hospital	Nurse	3	No		Yes	Yes	Yes	Yes	No	A little worried	Very worried	Very worried	A little worried	Yes	Yes	Yes	Yes	Don’t know							A little hesitant	Agree	Yes	Strongly Agree	Strongly Agree	Yes	Agree	Disagree	Disagree	Disagree	Disagree	Agree	Agree	Strongly Agree	Agree	Agree	Disagree	Agree
1381	45	Female	Unmarried	Bachelor	Senior	Governmental	Baoan Songgang People's Hospital	Nurse	4	No		Yes	Yes	Yes	Yes	No	A little worried	Very worried	Very worried	Not worried	No	No	No	Yes	Yes	Once or twice	Never	Never	Not worried	Not worried	Not worried	A little hesitant	Disagree	Don’t Know	Strongly Agree	Strongly Agree	Yes	Agree	Disagree	Disagree	Disagree	Disagree	Disagree	Agree	Disagree				Disagree
145	23	Female	Married	Diploma	Primary	Governmental	Baoan Songgang People's Hospital	Midwife	1	No		No	Yes	Yes	No	No	Worried	Worried	Worried	Not worried	No	No	Yes	Yes	Yes	Never	Never	Never	Not worried	Not worried	Not worried	Very hesitant	Agree	Yes	Strongly Agree	Strongly Agree	Yes	Agree	Strongly Disagree	Strongly Disagree	Disagree	Disagree	Agree	Strongly Agree	Disagree				Disagree
224	40	Female	Unmarried	Bachelor	Intermediate	Governmental	Baoan Songgang People's Hospital	Obstetrician and Gynecologist	3	No	0	Yes	Yes	Yes	No	No	Not worried	Worried	A little worried	Not worried	No	No	Yes	Yes	Yes	Never	Never	Never	Not worried	Not worried	Not worried	Somewhat hesitant	Strongly Agree	Don’t Know	Strongly Agree	Strongly Agree	Yes	Agree	Disagree	Disagree	Disagree	Disagree	Agree	Agree	Disagree				Disagree
915	38	Female	Unmarried	Bachelor	Intermediate	Governmental	Baoan Songgang People's Hospital	Medical /Laboratory Technician	3	No		No	Yes	Yes	No	No	Not worried	Not applicable	Not applicable	Not worried	No	Not applicable	No	Yes	No							Not hesitant	Disagree	Don’t Know	Strongly Agree	Strongly Agree	Don’t Know	Disagree	Strongly Disagree	Disagree	Disagree	Disagree	Disagree	Agree	Disagree				Disagree
260	28	Female	Unmarried	Diploma	Primary	Governmental	Baoan Songgang People's Hospital	Nurse	2	No	1-5	No	No	No	No	Yes	Not worried	Very worried	Very worried	Not worried	No	No	No	Yes	Yes	Never	Never	Never	Not worried	Not worried	Not worried	Very hesitant	Agree	Yes	Strongly Agree	Strongly Agree	Yes	Disagree	Disagree	Disagree	Disagree	Disagree	Strongly Agree	Strongly Agree	Strongly Agree	Disagree	Agree	Agree	Strongly Disagree
227	45	Male	Unmarried	Diploma	Intermediate	Governmental	Baoan Songgang People's Hospital	Pharmacist	4	No	0	No	No	No	No	Yes	Not applicable	Not applicable	Not applicable	Not applicable	Not applicable	Not applicable	Not applicable	Not applicable	Don’t know							Very hesitant	Disagree	Don’t Know	Disagree	Strongly Agree	Don’t Know	Strongly Disagree	Strongly Disagree	Agree	Agree	Disagree	Agree	Agree	Disagree				Disagree
739	36	Female	Unmarried	Bachelor	Intermediate	Governmental	Baoan Songgang People's Hospital	Doctor	3	No		No	Yes	Yes	No	No	A little worried	Worried	Worried	A little worried	Yes	Yes	Yes	Yes	Don’t know							A little hesitant	Strongly Agree	Yes	Strongly Agree	Strongly Agree	Don’t Know	Disagree	Disagree	Disagree	Disagree	Strongly Disagree	Agree	Agree	Disagree				Disagree
237	29	Female	Married	Diploma	Primary	Governmental	Baoan Songgang People's Hospital	Nurse	1	No	1-5	No	Yes	Yes	No	No	A little worried	Very worried	Very worried	Not worried	Yes	No	No	Yes	Don’t know							Not hesitant	Disagree	No	Strongly Agree	Strongly Agree	Don’t Know	Strongly Agree	Strongly Disagree	Disagree	Disagree	Disagree	Agree	Strongly Agree	Disagree				Disagree
161	24	Female	Married	Diploma	Primary	Governmental	Baoan Songgang People's Hospital	Nurse	1	No	0	Yes	Yes	Yes	No	No	Very worried	Worried	A little worried	Not worried	Not applicable	Yes	Yes	Yes	Yes	Once or twice	Never	Never	A little worried	Worried	A little worried	Not hesitant	Agree	Yes	Strongly Agree	Strongly Agree	Yes	Disagree	Disagree	Strongly Disagree	Disagree	Disagree	Strongly Disagree	Agree	Disagree				Disagree
212	23	Female	Married	Bachelor	None	Governmental	Baoan Songgang People's Hospital	Nurse	1	No		No	Yes	Yes	No	No	Not applicable	Not applicable	Not applicable	Not applicable	Not applicable	Not applicable	Not applicable	Not applicable	Yes	Never	Never	Never	Not worried	Not worried	Not worried	Not hesitant	Strongly Agree	Don’t Know	Strongly Agree	Strongly Agree	Yes	Disagree	Strongly Disagree	Disagree	Disagree	Strongly Disagree	Disagree	Strongly Disagree	Strongly Disagree				Strongly Disagree
173	23	Female	Married	Diploma	Primary	Governmental	Baoan Songgang People's Hospital	Nurse	1	No		No	Yes	Yes	No	No	Not applicable	Not applicable	Not applicable	Not worried	Not applicable	Not applicable	Not applicable	Not applicable	Yes	Never	Never	Never	Not worried	Not worried	Not worried	Not hesitant	Strongly Agree	Yes	Strongly Agree	Strongly Agree	Yes	Disagree	Disagree	Disagree	Disagree	Disagree	Agree	Agree	Disagree				Disagree
127	30	Female	Unmarried	Bachelor	Primary	Governmental	Baoan Songgang People's Hospital	Doctor	1	No		No	Yes	No	No	No	Not worried	Not applicable	Not applicable	Not worried	No	No	Yes	Yes	Don’t know							Somewhat hesitant	Disagree	Don’t Know	Strongly Agree	Strongly Agree	Don’t Know	Disagree	Disagree	Agree	Disagree	Disagree	Disagree	Agree	Disagree				Disagree
262	23	Female	Married	Diploma	Primary	Governmental	Baoan Songgang People's Hospital	Nurse	2	No	1-5	No	Yes	Yes	No	No	Not worried	A little worried	A little worried	Not worried	Yes	Yes	No	Yes	Yes	Never	Never	Never	Not worried	Not worried	Not worried	A little hesitant	Agree	Don’t Know	Strongly Agree	Strongly Agree	Yes	Agree	Disagree	Disagree	Disagree	Strongly Disagree	Disagree	Strongly Agree	Disagree				Disagree
281	40	Female	Unmarried	Bachelor	Intermediate	Governmental	Baoan Songgang People's Hospital	Midwife	3	Yes	0	Yes	Yes	Yes	Yes	No	Not worried	Not worried	Not worried	Not worried	No	No	No	Yes	Don’t know							Not hesitant	Strongly Agree	Yes	Strongly Agree	Strongly Agree	Yes	Disagree	Disagree	Disagree	Disagree	Disagree	Disagree	Agree	Disagree				Disagree
231	25	Female	Unmarried	Diploma	Primary	Governmental	Baoan Songgang People's Hospital	Nurse	2	No	1-5	No	Yes	Yes	No	No	Not worried	Worried	Very worried	Not worried	Not applicable	Yes	No	Yes	Yes	Never	Never	Never	Not worried	Not worried	Not worried	A little hesitant	Strongly Agree	No	Strongly Agree	Strongly Agree	No	Agree	Strongly Disagree	Strongly Agree	Strongly Agree	Disagree	Agree	Strongly Agree	Strongly Disagree				Strongly Disagree
290	29	Female	Married	Bachelor	Primary	Governmental	Baoan Songgang People's Hospital	Nurse	2	No		No	Yes	Yes	No	No	A little worried	Very worried	Worried	Not worried	No	Yes	Yes	Yes	Yes	Never	Never	Never	A little worried	Very worried	Very worried	Somewhat hesitant	Agree	Yes	Strongly Agree	Strongly Agree	Don’t Know	Disagree	Agree	Disagree	Agree	Disagree	Strongly Agree	Strongly Agree	Agree	Agree	Disagree	Disagree	Agree
1207	30	Female	Unmarried	Diploma	Primary	Governmental	Baoan Songgang People's Hospital	Dentist	2	No	0	No	No	Yes	No	No	Very worried	Very worried	Very worried	Worried	No	Yes	Yes	Yes	Don’t know							Somewhat hesitant	Strongly Agree	Yes	Strongly Agree	Strongly Agree	Don’t Know	Disagree	Disagree	Agree	Disagree	Disagree	Agree	Agree	Disagree				Disagree
234	27	Female	Unmarried	Diploma	Primary	Governmental	Baoan Songgang People's Hospital	Nurse	2	No	6-10	No	Yes	Yes	No	No	A little worried	Worried	Worried	Not worried	No	No	Yes	Yes	Yes	Never	Never	Never	Not worried	Not worried	Not worried	A little hesitant	Agree	Don’t Know	Strongly Agree	Strongly Agree	Don’t Know	Disagree	Disagree	Disagree	Disagree	Disagree	Agree	Agree	Disagree				Disagree
235	30	Female	Unmarried	Bachelor	Primary	Governmental	Baoan Songgang People's Hospital	Doctor	1	No	1-5	No	Yes	No	No	No	A little worried	Worried	Worried	A little worried	Yes	No	Yes	No	Yes	Never	Never	Never	Not worried	Not worried	Not worried	A little hesitant	Agree	No	Disagree	Strongly Agree	Don’t Know	Agree	Disagree	Agree	Agree	Agree	Agree	Strongly Agree	Agree	Agree	Disagree	Agree	Agree
137	27	Female	Married	Diploma	Primary	Governmental	Baoan Songgang People's Hospital	Nurse	1	No		Yes	Yes	Yes	Yes	No	A little worried	Very worried	Worried	Not worried	Yes	Yes	Yes	Yes	Yes	Never	Never	Never	Worried	Not worried	Not worried	Somewhat hesitant	Strongly Agree	Yes	Strongly Agree	Strongly Agree	Yes	Agree	Disagree	Strongly Disagree	Strongly Disagree	Disagree	Agree	Strongly Agree	Agree	Agree	Agree	Disagree	Strongly Disagree
243	39	Female	Unmarried	Bachelor	Intermediate	Governmental	Baoan Songgang People's Hospital	Nurse	4	No	0	No	Yes	No	No	No	A little worried	Very worried	Very worried	Not worried	No	Yes	Yes	Yes	No							A little hesitant	Strongly Agree	Yes	Strongly Agree	Strongly Agree	No	Agree	Agree	Agree	Agree	Disagree	Strongly Agree	Strongly Agree	Agree	Agree	Agree	Agree	Disagree
130	25	Female	Married	Bachelor	Primary	Governmental	Baoan Songgang People's Hospital	Nurse	1	No		Yes	Yes	Yes	Yes	No	A little worried	A little worried	Not worried	Not worried	No	Yes	Yes	No	Don’t know							A little hesitant	Strongly Agree	No	Strongly Agree	Strongly Agree	Yes	Disagree	Agree	Agree	Strongly Disagree	Strongly Disagree	Agree	Agree	Disagree				Strongly Disagree
292	34	Female	Married	Bachelor	Intermediate	Governmental	Baoan Songgang People's Hospital	Nurse	3	No		No	Yes	Yes	No	No	Not worried	Not applicable	Not worried	Not worried	No	No	No	No	No							A little hesitant	Disagree	Don’t Know	Strongly Agree	Strongly Agree	Don’t Know	Agree	Disagree	Disagree	Disagree	Disagree	Agree	Agree	Disagree				Disagree
286	25	Female	Married	Bachelor	Primary	Governmental	Baoan Songgang People's Hospital	Midwife	1	No	1-5	Yes	Yes	Yes	Yes	No	A little worried	Worried	Worried	Not worried	No	Yes	No	Yes	Yes	Never	Never	Never	Not worried	Not worried	Not worried	A little hesitant	Strongly Agree	Don’t Know	Strongly Agree	Strongly Agree	Yes	Disagree	Disagree	Disagree	Disagree	Disagree	Disagree	Agree	Disagree				Disagree
285	33	Female	Unmarried	Bachelor	Intermediate	Governmental	Baoan Songgang People's Hospital	Doctor	2	No	0	Yes	Yes	Yes	Yes	No	A little worried	Very worried	Very worried	A little worried	No	No	No	Yes	Yes	Once or twice	Never	Never	A little worried	A little worried	Worried	Somewhat hesitant	Strongly Agree	No	Strongly Agree	Strongly Agree	Yes	Agree	Disagree	Agree	Agree	Disagree	Strongly Agree	Strongly Agree	Agree	Agree	Agree	Disagree	Disagree
529	54	Male	Unmarried	Master or higher	Senior	Governmental	Baoan Songgang People's Hospital	Doctor	4	No	≥11	Yes	Yes	Yes	Yes	No	Not worried	Not worried	Not worried	Not worried	No	No	No	No	No							Not hesitant	Agree	Yes	Strongly Agree	Strongly Agree	Yes	Disagree	Disagree	Disagree	Disagree	Disagree	Disagree	Disagree	Disagree				Disagree
257		Female	Unmarried	Bachelor	Senior	Governmental	Baoan Songgang People's Hospital	Obstetrician and Gynecologist	3	No	0	No	Yes	Yes	No	No	Not worried	A little worried	A little worried	Not worried	No	Yes	Yes	Yes	Don’t know							A little hesitant	Agree	Don’t Know	Strongly Agree	Strongly Agree	Don’t Know	Agree	Disagree	Disagree	Disagree	Disagree	Agree	Strongly Agree	Agree	Agree	Agree	Disagree	Disagree
287	23	Female	Married	Diploma	Primary	Governmental	Baoan Songgang People's Hospital	Nurse	1	No		No	Yes	Yes	Yes	No	Not worried	Worried	Worried	Not worried	No	Yes	No	Yes	Don’t know							A little hesitant	Strongly Agree	Don’t Know	Strongly Agree	Strongly Agree	Don’t Know	Disagree	Disagree	Disagree	Disagree	Disagree	Agree	Disagree	Disagree				Disagree
158	39	Male	Unmarried	Bachelor	Intermediate	Governmental	Baoan Songgang People's Hospital	Doctor	3	No	1-5	No	Yes	Yes	No	No	Not worried	Not worried	Not worried	Not worried	Yes	Yes	Yes	Yes	Yes	Never	Never	Never	Not worried	Not worried	Not worried	A little hesitant	Agree	Yes	Strongly Agree	Strongly Agree	Don’t Know	Disagree	Strongly Disagree	Agree	Agree	Disagree	Agree	Strongly Agree	Strongly Disagree				Disagree
1170	35	Male	Unmarried	Bachelor	Primary	Governmental	Baoan Songgang People's Hospital	Medical /Laboratory Technician	2	No	0	Yes	Yes	Yes	Yes	No	Not worried	Not applicable	Not applicable	Not applicable	No	No	No	No	Don’t know							Not hesitant	Disagree	No	Strongly Agree	Strongly Agree	Yes	Disagree	Disagree	Disagree	Disagree	Disagree	Disagree	Disagree	Disagree				Disagree
279	28	Female	Unmarried	Bachelor	Primary	Governmental	Baoan Songgang People's Hospital	Nurse	2	No	1-5	No	Yes	Yes	No	No	A little worried	Very worried	Very worried	Not worried	No	Yes	Yes	Yes	Don’t know							A little hesitant	Disagree	Don’t Know	Strongly Agree	Strongly Agree	Don’t Know	Agree	Disagree	Disagree	Disagree	Disagree	Agree	Strongly Agree	Disagree				Disagree
1383	29	Male	Married	Master or higher	Primary	Governmental	Baoan Songgang People's Hospital	Doctor	1	Yes	0	No	Yes	No	No	No	A little worried	A little worried	Worried	Not worried	No	No	Yes	Yes	Don’t know							A little hesitant	Agree	Yes	Strongly Agree	Strongly Agree	Don’t Know	Agree	Disagree	Strongly Disagree	Agree	Disagree	Disagree	Agree	Agree	Disagree	Disagree	Agree	Agree
271	28	Female	Married	Diploma	Primary	Governmental	Baoan Songgang People's Hospital	Nurse	2	No	≥11	No	Yes	Yes	No	No	A little worried	A little worried	Worried	A little worried	No	No	No	No	Yes	Never	Never	Never	Not worried	Not worried	Not worried	A little hesitant	Strongly Agree	Yes	Strongly Agree	Strongly Agree	Yes	Agree	Disagree	Agree	Disagree	Disagree	Agree	Disagree	Disagree				Disagree
256	31	Female	Unmarried	Bachelor	Intermediate	Governmental	Baoan Songgang People's Hospital	Nurse	2	No	1-5	No	Yes	Yes	No	No	Not worried	Not worried	A little worried	Not worried	No	No	No	No	Yes	Never	Never	Never	Not worried	Not worried	Not worried	Not hesitant	Strongly Agree	Yes	Strongly Agree	Strongly Agree	Yes	Disagree	Strongly Disagree	Strongly Disagree	Strongly Disagree	Strongly Disagree	Disagree	Disagree	Strongly Disagree				Strongly Disagree
194	27	Female	Unmarried	Bachelor	Intermediate	Governmental	Baoan Songgang People's Hospital	Nurse	2	No		Yes	Yes	Yes	No	No	Very worried	Very worried	Very worried	Very worried	Yes	Yes	Yes	Yes	Yes	Never	Never	Never	A little worried	Very worried	Not worried	Very hesitant	Strongly Agree	No	Strongly Agree	Strongly Agree	No	Strongly Agree	Agree	Strongly Agree	Strongly Agree	Strongly Agree	Strongly Agree	Strongly Agree	Strongly Agree	Agree	Agree	Agree	Strongly Agree
258	30	Female	Unmarried	Bachelor	Primary	Governmental	Baoan Songgang People's Hospital	Obstetrician and Gynecologist	2	No		Yes	Yes	Yes	No	No	Not worried	A little worried	A little worried	Not worried	No	Yes	Yes	Yes	Yes	Never	Never	Never	Not worried	Not worried	Not worried	Not hesitant	Strongly Agree	Don’t Know	Strongly Agree	Strongly Agree	Yes	Agree	Disagree	Agree	Disagree	Disagree	Agree	Agree	Disagree				Disagree
278	41	Female	Divorced	Master or higher	Senior	Governmental	Baoan Songgang People's Hospital	Doctor	3	No	0	No	Yes	Yes	No	No	A little worried	Not applicable	Not applicable	Not applicable	Not applicable	No	Yes	Yes	Don’t know							Somewhat hesitant	Disagree	Don’t Know	Strongly Agree	Strongly Agree	No	Agree	Disagree	Disagree	Disagree	Disagree	Agree	Agree	Agree	Agree	Agree	Disagree	Disagree
920	21	Female	Married	Diploma	Primary	Governmental	Baoan Songgang People's Hospital	Nurse	1	No		No	Yes	Yes	No	No	Not worried	Worried	Worried	Not worried	Yes	Yes	Yes	No	Don’t know							Somewhat hesitant	Strongly Agree	Yes	Strongly Agree	Strongly Agree	Yes	Disagree	Disagree	Disagree	Disagree	Disagree	Strongly Agree	Strongly Agree	Strongly Agree	Disagree	Agree	Agree	Disagree
1006	29	Male	Married	Bachelor	Primary	Governmental	Baoan Songgang People's Hospital	Obstetrician and Gynecologist	1	No		No	Yes	Yes	Yes	No	A little worried	Worried	A little worried	Not worried	Not applicable	Yes	Yes	Yes	No							A little hesitant	Strongly Agree	Yes	Strongly Agree	Strongly Agree	Yes	Disagree	Disagree	Disagree	Disagree	Disagree	Agree	Agree	Disagree				Disagree
263	28	Female	Unmarried	Bachelor	Primary	Governmental	Baoan Songgang People's Hospital	Midwife	1	No	1-5	Yes	Yes	No	No	No	Not worried	Very worried	Very worried	Not worried	No	Yes	Yes	No	Yes	Never	Never	Never	Not worried	Not worried	Not worried	A little hesitant	Agree	Don’t Know	Strongly Agree	Strongly Agree	Don’t Know	Agree	Disagree	Strongly Agree	Disagree	Disagree	Agree	Agree	Disagree				Disagree
284	29	Female	Unmarried	Diploma	Primary	Governmental	Baoan Songgang People's Hospital	Nurse	2	No		No	Yes	Yes	No	No	Not worried	A little worried	A little worried	Not worried	No	No	Yes	Yes	Yes	Never	Never	Never	Not worried	Not worried	Not worried	A little hesitant	Disagree	Yes	Disagree	Strongly Agree	Yes	Disagree	Disagree	Strongly Disagree	Strongly Disagree	Strongly Disagree	Strongly Disagree	Disagree	Strongly Agree	Agree	Agree	Disagree	Strongly Disagree
1206	30	Male	Unmarried	Bachelor	Primary	Governmental	Baoan Songgang People's Hospital	Pharmacist	1	No		Yes	Yes	Yes	Yes	No	Not applicable	Not applicable	Not applicable	Not applicable	Not applicable	Not applicable	Not applicable	Not applicable	Yes	Never	Never	Never	Not worried	A little worried	Not worried	Not hesitant	Strongly Agree	Yes	Strongly Agree	Strongly Agree	Yes	Disagree	Agree	Disagree	Agree	Agree	Agree	Disagree	Disagree				Disagree
282	37	Male	Unmarried	Master or higher	Intermediate	Governmental	Baoan Songgang People's Hospital	Doctor	2	No		No	Yes	Yes	No	No	Not worried	A little worried	A little worried	Not worried	No	Yes	Yes	Yes	Yes	Once or twice	Never	Never	Not worried	Not worried	Not worried	A little hesitant	Agree	Don’t Know	Strongly Agree	Strongly Agree	Don’t Know	Agree	Disagree	Disagree	Disagree	Disagree	Agree	Agree	Disagree				Disagree
246	29	Female	Unmarried	High school or others	Primary	Governmental	Baoan Songgang People's Hospital	Receptionist	2	No	0	Yes	Yes	Yes	Yes	No	Not worried	Very worried	Very worried	Not worried	No	Yes	Yes	Yes	Don’t know							Not hesitant	Agree	Yes	Strongly Agree	Strongly Agree	Yes	Strongly Agree	Disagree	Disagree	Disagree	Disagree	Agree	Strongly Agree	Disagree				Disagree
288	28	Female	Married	Bachelor	Primary	Governmental	Baoan Songgang People's Hospital	Nurse	1	No		No	Yes	Yes	No	No	Not worried	A little worried	A little worried	Not worried	Yes	Yes	No	Yes	Don’t know							A little hesitant	Disagree	Yes	Disagree	Strongly Agree	Don’t Know	Disagree	Agree	Disagree	Disagree	Disagree	Disagree	Disagree	Disagree				Disagree
1272	23	Female	Married	Bachelor	Primary	Governmental	Baoan Songgang People's Hospital	Nurse	1	No	1-5	No	Yes	Yes	Yes	No	Not worried	A little worried	A little worried	Not worried	Yes	Yes	Yes	Yes	Yes	Never	Never	Never	Not worried	Not worried	Not worried	A little hesitant	Agree	Don’t Know	Strongly Agree	Strongly Agree	Don’t Know	Disagree	Disagree	Agree	Agree	Disagree	Agree	Strongly Agree	Disagree				Disagree
272	21	Female	Married	Diploma	Primary	Governmental	Baoan Songgang People's Hospital	Nurse	1	No		Yes	Yes	Yes	Yes	No	Not worried	A little worried	Worried	Not worried	Yes	Yes	No	No	Yes	Once or twice	Never	Never	Not worried	Not worried	Not worried	Not hesitant	Strongly Agree	Don’t Know	Strongly Agree	Strongly Agree	Yes	Strongly Disagree	Disagree	Agree	Disagree	Disagree	Disagree	Strongly Agree	Disagree				Disagree
259	45	Female	Unmarried	Bachelor	Senior	Governmental	Baoan Songgang People's Hospital	Obstetrician and Gynecologist	4	No		Yes	Yes	Yes	Yes	No	A little worried	Worried	Worried	Not worried	No	No	Yes	Yes	Don’t know							A little hesitant	Strongly Agree	Don’t Know	Strongly Agree	Strongly Agree	Yes	Agree	Disagree	Disagree	Disagree	Disagree	Disagree	Agree	Disagree				Disagree
143	39	Female	Unmarried	Bachelor	Senior	Governmental	Baoan Songgang People's Hospital	Nurse	4	No	0	No	Yes	Yes	No	No	Not worried	A little worried	A little worried	Not worried	No	No	Yes	Yes	No							Not hesitant	Disagree	Yes	Strongly Agree	Strongly Agree	No	Agree	Disagree	Disagree	Disagree	Strongly Disagree	Agree	Agree	Agree	Agree	Disagree	Agree	Disagree
275	28	Female	Married	Diploma	Primary	Governmental	Baoan Songgang People's Hospital	Nurse	1	No	1-5	No	Yes	Yes	Yes	No	A little worried	Very worried	Worried	Not worried	No	Yes	Yes	No	Don’t know							A little hesitant	Disagree	Don’t Know	Strongly Agree	Strongly Agree	Yes	Agree	Disagree	Disagree	Agree	Disagree	Agree	Strongly Agree	Agree	Disagree	Disagree	Agree	Agree
544	42	Female	Unmarried	Bachelor	Intermediate	Governmental	Baoan Songgang People's Hospital	Nurse	4	No	0	Yes	Yes	Yes	Yes	No	A little worried	Worried	Worried	Worried	No	Yes	No	Yes	Don’t know							A little hesitant	Agree	Don’t Know	Strongly Agree	Strongly Agree	No	Disagree	Disagree	Disagree	Disagree	Disagree	Disagree	Agree	Agree	Agree	Disagree	Agree	Disagree
233	40	Male	Married	Master or higher	Intermediate	Governmental	Baoan Songgang People's Hospital	Doctor	3	No		No	Yes	Yes	No	No	Not worried	A little worried	A little worried	Not worried	Yes	No	No	Yes	Yes	Once or twice	Never	Never	Not worried	Not worried	Not worried	A little hesitant	Agree	Yes	Disagree	Strongly Agree	Don’t Know	Strongly Agree	Disagree	Disagree	Disagree	Disagree	Agree	Agree	Disagree				Disagree
220	39	Female	Unmarried	Bachelor	Intermediate	Governmental	Baoan Songgang People's Hospital	Pharmacist	3	No		No	No	No	No	Yes	Not applicable	Not applicable	Not applicable	Not applicable	Not applicable	Not applicable	Not applicable	Not applicable	Don’t know							Very hesitant	Disagree	Don’t Know	Strongly Agree	Disagree	Don’t Know	Strongly Disagree	Strongly Disagree	Agree	Agree	Agree	Agree	Strongly Agree	Agree	Disagree	Disagree	Agree	Disagree
1220	20	Female	Married	Bachelor	None	Governmental	Baoan Songgang People's Hospital	Nursing worker	1	No	1-5	No	Yes	Yes	Yes	No	Not worried	A little worried	A little worried	Not worried	No	No	Yes	Yes	Don’t know							A little hesitant	Disagree	Yes	Strongly Agree	Strongly Agree	Yes	Disagree	Strongly Disagree	Disagree	Strongly Disagree	Disagree	Agree	Agree	Agree	Agree	Disagree	Disagree	Disagree
289	37	Female	Unmarried	Bachelor	Senior	Governmental	Baoan Songgang People's Hospital	Obstetrician and Gynecologist	3	No	0	Yes	Yes	Yes	Yes	No	A little worried	Very worried	A little worried	Not worried	Not applicable	Not applicable	Yes	Yes	Yes	Most of the time	Never	Never	Not worried	Not worried	Not worried	Somewhat hesitant	Strongly Agree	Don’t Know	Strongly Agree	Strongly Agree	Yes	Disagree	Disagree	Disagree	Disagree	Disagree	Agree	Agree	Strongly Agree	Agree	Agree	Disagree	Agree
223	28	Female	Unmarried	Bachelor	Intermediate	Governmental	Baoan Songgang People's Hospital	Nurse	2	Yes		No	Yes	No	No	No	A little worried	A little worried	A little worried	Not worried	No	Yes	No	Yes	No							Somewhat hesitant	Agree	No	Strongly Agree	Strongly Agree	Yes	Agree	Strongly Disagree	Strongly Disagree	Agree	Agree	Disagree	Strongly Agree	Disagree				Disagree
291	30	Female	Unmarried	Bachelor	Primary	Governmental	Baoan Songgang People's Hospital	Nurse	2	No	1-5	No	Yes	Yes	No	No	A little worried	A little worried	A little worried	A little worried	No	No	Yes	Yes	Yes	Never	Never	Never	Not worried	Not worried	Not worried	A little hesitant	Strongly Agree	Yes	Strongly Agree	Strongly Agree	Don’t Know	Agree	Disagree	Disagree	Disagree	Disagree	Disagree	Disagree	Disagree				Disagree
550	40	Male	Unmarried	Bachelor	Primary	Governmental	Baoan Songgang People's Hospital	Medical /Laboratory Technician	3	No		No	Yes	Yes	No	No	Not worried	Not applicable	Not applicable	Not applicable	Yes	Yes	Yes	Yes	Yes	Never	Never	Never	Not worried	Not worried	Not worried	A little hesitant	Strongly Agree	Yes	Strongly Agree	Strongly Agree	Yes	Agree	Disagree	Strongly Disagree	Disagree	Disagree	Agree	Agree	Disagree				Disagree
283	30	Female	Unmarried	Bachelor	Primary	Governmental	Baoan Songgang People's Hospital	Nurse	3	No		No	Yes	Yes	No	No	Not worried	A little worried	A little worried	Not worried	No	Yes	No	Yes	Yes	Never	Never	Never	Not worried	Not worried	Not worried	A little hesitant	Agree	Yes	Strongly Agree	Strongly Agree	Don’t Know	Agree	Disagree	Disagree	Disagree	Disagree	Agree	Agree	Disagree				Disagree
1382	39	Female	Unmarried	Diploma	Intermediate	Governmental	Baoan Songgang People's Hospital	Nurse	3	Yes		Yes	Yes	Yes	No	No	Not worried	Worried	A little worried	Not worried	No	No	Yes	Yes	Don’t know							Not hesitant	Strongly Agree	Don’t Know	Strongly Agree	Strongly Agree	Yes	Disagree	Disagree	Disagree	Disagree	Disagree	Disagree	Agree	Disagree				Disagree
392	24	Female	Married	Diploma	Primary	Private	Shenzhen Guangsheng Hospital	Nurse	1	No	0	No	Yes	No	No	No	Very worried	A little worried	Very worried	A little worried	Not applicable	Not applicable	Not applicable	Not applicable	Don’t know							Very hesitant	Disagree	No	Strongly Agree	Strongly Agree	Don’t Know	Disagree	Strongly Disagree	Strongly Disagree	Strongly Disagree	Strongly Disagree	Agree	Strongly Agree	Disagree				Disagree
414	25	Female	Unmarried	Diploma	Primary	Private	Shenzhen Guangsheng Hospital	Nurse	1	No	1-5	No	Yes	No	No	No	Very worried	Very worried	Very worried	Worried	Yes	Yes	Yes	Yes	Yes	Once or twice	Never	Never	Very worried	Very worried	Very worried	A little hesitant	Agree	No	Strongly Agree	Strongly Agree	Yes	Agree	Disagree	Disagree	Agree	Disagree	Agree	Agree	Disagree				Disagree
493	62	Male	Unmarried	Diploma	Intermediate	Private	Shenzhen Guangsheng Hospital	Doctor	4	No		No	No	Yes	No	No	Not worried	A little worried	A little worried	Not worried	No	No	No	Yes	Yes	Once or twice	Never	Never	Not worried	A little worried	Not worried	A little hesitant	Strongly Agree	Yes	Agree	Disagree	Don’t Know	Disagree	Disagree	Strongly Disagree	Agree	Disagree	Agree	Agree	Disagree				Disagree
438	61	Male	Unmarried	High school or others	Intermediate	Private	Shenzhen Guangsheng Hospital	Medical /Laboratory Technician	4	No		Yes	Yes	Yes	Yes	No	A little worried	A little worried	A little worried	Not worried	Yes	Yes	Yes	Yes	Yes	Never	Never	Never	Not worried	Not worried	Not worried	A little hesitant	Disagree	Yes	Strongly Agree	Strongly Agree	Yes	Agree	Disagree	Disagree	Disagree	Disagree	Strongly Agree	Strongly Agree	Strongly Disagree				Strongly Disagree
379	24	Female	Unmarried	Diploma	Primary	Private	Shenzhen Guangsheng Hospital	Public health care physician	2	Yes		Yes	Yes	Yes	Yes	No	Not worried	Not worried	A little worried	Not worried	No	No	No	Yes	Yes	Never	Never	Never	Not worried	Not worried	Not worried	A little hesitant	Agree	No	Disagree	Strongly Agree	Don’t Know	Agree	Disagree	Agree	Agree	Disagree	Disagree	Agree	Disagree				Disagree
416	21	Female	Married	Diploma	Primary	Private	Shenzhen Guangsheng Hospital	Medical /Laboratory Technician	1	No		Yes	Yes	Yes	Yes	No	A little worried	Very worried	Very worried	Worried	No	Yes	Yes	Yes	Don’t know							Somewhat hesitant	Strongly Agree	No	Strongly Agree	Strongly Agree	Yes	Agree	Disagree	Disagree	Disagree	Disagree	Agree	Agree	Disagree				Disagree
579	70	Male	Unmarried	Diploma	Senior	Private	Shenzhen Guangsheng Hospital	Medical /Laboratory Technician	4	Yes	0	Yes	Yes	Yes	Yes	No	Not worried	Not worried	Not worried	Not worried	Yes	Yes	Yes	Yes	Yes	Never	Never	Never	Not worried	Not worried	Not worried	Not hesitant	Strongly Agree	Yes	Strongly Agree	Strongly Agree	Yes	Agree	Disagree	Disagree	Disagree	Disagree	Disagree	Agree	Agree	Disagree	Agree	Disagree	Disagree
374	24	Female	Married	Diploma	Primary	Private	Shenzhen Guangsheng Hospital	Midwife	1	No	1-5	No	Yes	Yes	No	No	Not worried	A little worried	Not worried	Not worried	Yes	Yes	Yes	Yes	Don’t know							Not hesitant	Disagree	No	Strongly Agree	Strongly Agree	Yes	Agree	Disagree	Disagree	Disagree	Disagree	Disagree	Agree	Disagree				Disagree
389	22	Female	Married	Diploma	Primary	Private	Shenzhen Guangsheng Hospital	Nurse	1	No	0	No	Yes	Yes	No	No	Not worried	A little worried	A little worried	Not worried	No	Yes	No	Yes	No							Not hesitant	Agree	No	Strongly Agree	Strongly Agree	Yes	Disagree	Disagree	Disagree	Disagree	Disagree	Strongly Agree	Agree	Disagree				Disagree
403	23	Female	Married	Diploma	Primary	Private	Shenzhen Guangsheng Hospital	Medical /Laboratory Technician	1	No		No	Yes	Yes	No	No	Not applicable	Not applicable	Not applicable	Not applicable	Not applicable	Not applicable	Not applicable	Not applicable	Don’t know							Not hesitant	Disagree	Don’t Know	Strongly Agree	Disagree	Yes	Agree	Disagree	Agree	Agree	Disagree	Strongly Agree	Agree	Strongly Disagree				Disagree
436	43	Male	Unmarried	Diploma	Primary	Private	Shenzhen Guangsheng Hospital	Doctor	4	No		No	Yes	Yes	No	Yes	Not applicable	A little worried	A little worried	Not worried	Not applicable	Yes	Yes	Yes	Don’t know							A little hesitant	Strongly Agree	Yes	Strongly Agree	Strongly Agree	Yes	Disagree	Disagree	Agree	Disagree	Agree	Agree	Agree	Disagree				Disagree
408	30	Female	Unmarried	Diploma	Primary	Private	Shenzhen Guangsheng Hospital	Nurse	2	No	1-5	No	Yes	No	No	No	Very worried	Very worried	Very worried	A little worried	Yes	Yes	Yes	Yes	Yes	Never	Never	Never	A little worried	A little worried	Not worried	A little hesitant	Strongly Agree	Yes	Strongly Agree	Strongly Agree	Yes	Agree	Disagree	Disagree	Agree	Disagree	Agree	Agree	Agree	Disagree	Disagree	Agree	Agree
419	26	Female	Married	Bachelor	Primary	Private	Shenzhen Guangsheng Hospital	Pharmacist	1	No	0	No	Yes	No	No	No	Not applicable	Not applicable	Not applicable	Not applicable	Not applicable	Not applicable	Not applicable	Not applicable	Don’t know							Somewhat hesitant	Disagree	Don’t Know	Strongly Agree	Strongly Agree	Don’t Know	Disagree	Strongly Disagree	Strongly Disagree	Disagree	Disagree	Agree	Agree	Agree	Disagree	Disagree	Agree	Agree
430	23	Female	Married	Diploma	None	Private	Shenzhen Guangsheng Hospital	Medical /Laboratory Technician	1	No		No	Yes	No	No	No	Not applicable	Not applicable	Not applicable	Not applicable	Not applicable	Not applicable	Not applicable	Not applicable	Don’t know							A little hesitant	Disagree	Don’t Know	Disagree	Disagree	Don’t Know	Strongly Disagree	Strongly Disagree	Strongly Disagree	Strongly Disagree	Strongly Disagree	Agree	Agree	Strongly Disagree				Strongly Disagree
417	36	Male	Unmarried	Diploma	Primary	Private	Shenzhen Guangsheng Hospital	Anesthetist	3	No		Yes	Yes	Yes	Yes	No	Not worried	Not worried	Not worried	Not worried	No	Yes	Yes	No	No							A little hesitant	Disagree	Don’t Know	Strongly Agree	Strongly Agree	Yes	Agree	Disagree	Strongly Disagree	Agree	Disagree	Agree	Agree	Disagree				Disagree
380	25	Female	Unmarried	Diploma	Primary	Private	Shenzhen Guangsheng Hospital	Nurse	1	No		Yes	Yes	Yes	Yes	No	Not worried	Worried	Worried	A little worried	No	Yes	No	Yes	Don’t know							Not hesitant	Strongly Agree	Don’t Know	Strongly Agree	Strongly Agree	Yes	Agree	Disagree	Strongly Disagree	Disagree	Disagree	Agree	Agree	Disagree				Disagree
532	37	Male	Unmarried	Diploma	Primary	Private	Shenzhen Guangsheng Hospital	Doctor	2	No	6-10	Yes	Yes	Yes	Yes	No	Not worried	Not worried	Not worried	Not worried	No	Yes	No	Yes	Yes	Once or twice	Never	Never	A little worried	Not worried	Not worried	Not hesitant	Agree	Yes	Strongly Agree	Strongly Agree	Yes	Disagree	Disagree	Strongly Disagree	Strongly Disagree	Strongly Disagree	Disagree	Disagree	Disagree				Strongly Disagree
371	20	Female	Married	Diploma	Primary	Private	Shenzhen Guangsheng Hospital	Nurse	1	No	1-5	No	Yes	Yes	No	No	Very worried	Worried	Worried	Not worried	Yes	Yes	Yes	Yes	Don’t know							Somewhat hesitant	Agree	Yes	Strongly Agree	Strongly Agree	Don’t Know	Agree	Disagree	Disagree	Disagree	Disagree	Disagree	Agree	Disagree				Disagree
616	44	Male	Unmarried	Bachelor	Intermediate	Private	Shenzhen Guangsheng Hospital	Doctor	4	No	0	Yes	Yes	Yes	Yes	No	Not worried	Not worried	Not worried	Not worried	No	No	No	Yes	No							Not hesitant	Strongly Agree	Yes	Strongly Agree	Strongly Agree	Yes	Strongly Disagree	Strongly Disagree	Strongly Disagree	Strongly Disagree	Strongly Disagree	Strongly Disagree	Agree	Strongly Disagree				Strongly Disagree
525	24	Female	Married	Diploma	Primary	Private	Shenzhen Guangsheng Hospital	Doctor	1	No		No	Yes	No	No	No	Not applicable	Not applicable	Not applicable	Not applicable	Not applicable	Not applicable	Not applicable	Not applicable	Don’t know							A little hesitant	Disagree	Don’t Know	Disagree	Disagree	Don’t Know	Disagree	Disagree	Disagree	Disagree	Disagree	Disagree	Disagree	Disagree				Disagree
441	27	Female	Unmarried	Diploma	Primary	Private	Shenzhen Guangsheng Hospital	Nurse	1	No		Yes	No	Yes	No	No	Very worried	A little worried	Very worried	Not worried	Yes	Yes	Yes	Yes	Don’t know							Somewhat hesitant	Agree	Yes	Strongly Agree	Strongly Agree	Yes	Strongly Agree	Strongly Disagree	Strongly Disagree	Strongly Disagree	Disagree	Agree	Agree	Strongly Disagree				Strongly Disagree
369	19	Female	Married	Diploma	Primary	Private	Shenzhen Guangsheng Hospital	Nurse	1	No	1-5	No	Yes	Yes	No	No	A little worried	A little worried	A little worried	A little worried	No	Yes	Yes	Yes	Don’t know							Not hesitant	Agree	No	Strongly Agree	Strongly Agree	Don’t Know	Agree	Disagree	Disagree	Disagree	Disagree	Disagree	Agree	Disagree				Disagree
440	52	Male	Unmarried	Diploma	Intermediate	Private	Shenzhen Guangsheng Hospital	Doctor	4	Yes	0	Yes	Yes	Yes	Yes	No	Not worried	Not worried	Not worried	Not worried	No	Yes	No	Yes	Don’t know							A little hesitant	Strongly Agree	Yes	Strongly Agree	Strongly Agree	Yes	Strongly Disagree	Strongly Agree	Strongly Disagree	Strongly Agree	Strongly Agree	Strongly Agree	Strongly Agree	Agree	Disagree	Disagree	Agree	Agree
620	29	Female	Unmarried	Bachelor	Primary	Private	Shenzhen Guangsheng Hospital	Obstetrician and Gynecologist	2	No		No	Yes	No	No	No	Worried	Worried	A little worried	A little worried	Not applicable	Yes	Yes	Yes	Yes	Once or twice	Never	Never	A little worried	A little worried	A little worried	A little hesitant	Strongly Agree	No	Agree	Strongly Agree	No	Agree	Agree	Agree	Agree	Agree	Agree	Agree	Disagree				Disagree
405	20	Female	Married	High school or others	Primary	Private	Shenzhen Guangsheng Hospital	Nurse	1	No		No	Yes	No	No	No	A little worried	Worried	Worried	A little worried	Not applicable	Yes	Yes	Yes	No							Somewhat hesitant	Disagree	Don’t Know	Strongly Agree	Strongly Agree	Don’t Know	Disagree	Strongly Disagree	Disagree	Disagree	Disagree	Agree	Agree	Disagree				Disagree
1194	25	Female	Married	Diploma	None	Private	Shenzhen Guangsheng Hospital	Nurse	1	No	1-5	Yes	Yes	Yes	Yes	No	Not worried	Very worried	Not worried	Not worried	No	No	No	Yes	Yes	Never	Never	Never	Not worried	Not worried	Not worried	Somewhat hesitant	Agree	Yes	Strongly Agree	Strongly Agree	Yes	Strongly Agree	Strongly Disagree	Strongly Disagree	Strongly Disagree	Strongly Disagree	Strongly Agree	Disagree	Disagree				Disagree
593	23	Male	Married	Diploma	Primary	Private	Shenzhen Guangsheng Hospital	Nurse	1	No	0	No	Yes	Yes	No	No	Worried	A little worried	A little worried	Not worried	No	No	Yes	Yes	Don’t know							Not hesitant	Disagree	Don’t Know	Strongly Agree	Strongly Agree	Yes	Agree	Disagree	Disagree	Disagree	Disagree	Disagree	Disagree	Strongly Disagree				Strongly Disagree
390	24	Female	Married	Diploma	None	Private	Shenzhen Guangsheng Hospital	Receptionist	1	No		Yes	Yes	Yes	Yes	No	Not applicable	Not applicable	Not applicable	Not applicable	Not applicable	Not applicable	Not applicable	Yes	Don’t know							Somewhat hesitant	Strongly Agree	Yes	Strongly Agree	Strongly Agree	Yes	Disagree	Disagree	Agree	Agree	Disagree	Agree	Agree	Disagree				Disagree
433	27	Female	Unmarried	Diploma	None	Private	Shenzhen Guangsheng Hospital	Doctor	1	Yes		Yes	Yes	Yes	Yes	No	A little worried	Not applicable	Not applicable	Not applicable	No	Yes	Yes	Yes	Don’t know							Not hesitant	Strongly Agree	Don’t Know	Strongly Agree	Strongly Agree	Yes	Strongly Disagree	Disagree	Strongly Disagree	Disagree	Disagree	Disagree	Strongly Agree	Disagree				Strongly Disagree
1301	19	Female	Married	Diploma	Primary	Private	Shenzhen Guangsheng Hospital	Nurse	1	No	1-5	No	Yes	Yes	No	No	A little worried	A little worried	A little worried	A little worried	Yes	Yes	Yes	Yes	Don’t know							A little hesitant	Agree	Don’t Know	Strongly Agree	Strongly Agree	Don’t Know	Strongly Agree	Disagree	Disagree	Disagree	Disagree	Strongly Agree	Agree	Disagree				Disagree
453	25	Female	Married	Diploma	Primary	Private	Shenzhen Guangsheng Hospital	Doctor	1	No	0	Yes	Yes	Yes	Yes	No	A little worried	A little worried	A little worried	Not worried	Not applicable	Not applicable	Not applicable	Not applicable	Don’t know							Somewhat hesitant	Disagree	Yes	Strongly Agree	Strongly Agree	Yes	Disagree	Disagree	Strongly Disagree	Strongly Disagree	Strongly Disagree	Disagree	Agree	Disagree				Disagree
472	23	Female	Married	Diploma	Primary	Private	Shenzhen Guangsheng Hospital	Nurse	1	No		No	No	No	No	Yes	Worried	Worried	Worried	Worried	Yes	Yes	Yes	Yes	Yes	Never	Never	Never	Worried	A little worried	Not worried	Not hesitant	Strongly Agree	No	Strongly Agree	Strongly Agree	Yes	Disagree	Agree	Strongly Disagree	Strongly Disagree	Agree	Agree	Agree	Disagree				Disagree
431	32	Female	Married	Diploma	None	Private	Shenzhen Guangsheng Hospital	Cashier	1	No	1-5	Yes	Yes	Yes	Yes	No	Not worried	Not applicable	Not applicable	Not applicable	Not applicable	Not applicable	Not applicable	Not applicable	Don’t know							Not hesitant	Disagree	Yes	Strongly Agree	Strongly Agree	Yes	Strongly Disagree	Strongly Disagree	Strongly Disagree	Strongly Disagree	Strongly Disagree	Agree	Agree	Strongly Disagree				Strongly Disagree
496	33	Female	Unmarried	High school or others	None	Private	Shenzhen Guangsheng Hospital	Receptionist	1	No	0	Yes	Yes	Yes	Yes	No	A little worried	A little worried	A little worried	Not worried	No	Yes	Yes	Yes	Don’t know							Somewhat hesitant	Disagree	Yes	Strongly Agree	Strongly Agree	No	Agree	Strongly Disagree	Agree	Agree	Agree	Agree	Agree	Disagree				Disagree
411	29	Male	Unmarried	Diploma	Primary	Private	Shenzhen Guangsheng Hospital	Public health care physician	2	No		No	Yes	Yes	No	No	Not applicable	Not applicable	Not applicable	Not applicable	Not applicable	Not applicable	Not applicable	Not applicable	Don’t know							A little hesitant	Disagree	Don’t Know	Disagree	Disagree	Don’t Know	Agree	Strongly Disagree	Agree	Agree	Strongly Disagree	Agree	Strongly Agree	Agree	Disagree	Disagree	Agree	Agree
537	25	Male	Unmarried	Bachelor	None	Private	Shenzhen Guangsheng Hospital	Cleaning staff	1	No		No	No	No	No	Yes	Not worried	Very worried	Very worried	Not worried	No	Yes	Yes	No	Yes	Never	Never	Never	Not worried	Not worried	Not worried	A little hesitant	Strongly Agree	Yes	Strongly Agree	Strongly Agree	Yes	Agree	Disagree	Agree	Agree	Disagree	Disagree	Strongly Agree	Strongly Disagree				Strongly Disagree
404	24	Female	Unmarried	Diploma	Primary	Private	Shenzhen Guangsheng Hospital	Nurse	1	No	1-5	Yes	Yes	Yes	Yes	No	Not worried	A little worried	A little worried	Not worried	No	No	Yes	Yes	Yes	Never	Never	Never	Not worried	Not worried	Not worried	Not hesitant	Agree	No	Strongly Agree	Strongly Agree	No	Disagree	Disagree	Strongly Disagree	Disagree	Disagree	Disagree	Strongly Agree	Disagree				Disagree
975	50	Female	Unmarried	High school or others	None	Private	Shenzhen Guangsheng Hospital	Cleaning staff	2	No	0	No	No	No	No	Yes	Not applicable	Not applicable	Not applicable	Not applicable	Not applicable	Not applicable	Not applicable	Not applicable	Don’t know							A little hesitant	Disagree	Don’t Know	Disagree	Disagree	Don’t Know	Agree	Disagree	Agree	Disagree	Disagree	Disagree	Disagree	Disagree				Disagree
483	26	Female	Unmarried	High school or others	Intermediate	Private	Shenzhen Guangsheng Hospital	Cashier	1	No		No	No	No	No	Yes	Not applicable	Not applicable	Not applicable	Not applicable	Not applicable	Not applicable	Not applicable	Not applicable	Don’t know							Not hesitant	Disagree	Don’t Know	Disagree	Disagree	Don’t Know	Strongly Disagree	Strongly Disagree	Strongly Disagree	Strongly Disagree	Strongly Disagree	Strongly Disagree	Strongly Disagree	Strongly Disagree				Strongly Disagree
974	51	Male	Unmarried	High school or others	None	Private	Shenzhen Guangsheng Hospital	Cleaning staff	2	No		No	No	No	No	Yes	Not applicable	Not applicable	Not applicable	Not applicable	Not applicable	Not applicable	Not applicable	Not applicable	Don’t know							Somewhat hesitant	Disagree	Don’t Know	Disagree	Disagree	Don’t Know	Agree	Disagree	Agree	Disagree	Disagree	Disagree	Agree	Disagree				Disagree
484	23	Female	Unmarried	Bachelor	Primary	Private	Shenzhen Guangsheng Hospital	Cashier	1	Yes		Yes	Yes	Yes	Yes	No	Not applicable	Not applicable	Not applicable	Not applicable	Not applicable	Not applicable	Not applicable	Not applicable	Yes	Never	Never	Never	Not worried	Not worried	Not worried	Not hesitant	Strongly Agree	Yes	Strongly Agree	Strongly Agree	Yes	Strongly Disagree	Strongly Disagree	Strongly Disagree	Strongly Disagree	Strongly Disagree	Strongly Disagree	Strongly Disagree	Strongly Disagree				Strongly Disagree
407	40	Female	Unmarried	Diploma	Intermediate	Private	Shenzhen Guangsheng Hospital	Nurse	3	No		Yes	Yes	Yes	Yes	No	Not applicable	Not applicable	Not applicable	Not applicable	Not applicable	Not applicable	Not applicable	Not applicable	Don’t know							A little hesitant	Agree	No	Strongly Agree	Strongly Agree	Don’t Know	Agree	Disagree	Agree	Disagree	Disagree	Disagree	Agree	Disagree				Disagree
456	34	Male	Unmarried	Bachelor	Primary	Private	Shenzhen Guangsheng Hospital	Doctor	1	No		No	Yes	Yes	No	No	Not worried	Not worried	Not worried	Not worried	Not applicable	Yes	Yes	Yes	Don’t know							A little hesitant	Disagree	Yes	Strongly Agree	Strongly Agree	Yes	Disagree	Disagree	Strongly Disagree	Disagree	Disagree	Agree	Disagree	Agree	Agree	Agree	Disagree	Disagree
406	28	Female	Unmarried	Diploma	Primary	Private	Shenzhen Guangsheng Hospital	Nurse	1	No		No	Yes	No	No	No	Not applicable	A little worried	Worried	Not worried	No	Yes	Yes	No	Don’t know							Somewhat hesitant	Strongly Agree	Yes	Agree	Strongly Agree	Yes	Disagree	Agree	Strongly Agree	Strongly Agree	Strongly Agree	Disagree	Agree	Agree	Disagree	Disagree	Agree	Agree
412	35	Female	Unmarried	Diploma	Intermediate	Private	Shenzhen Guangsheng Hospital	Nurse	3	No		Yes	Yes	Yes	Yes	No	Not worried	A little worried	Worried	Not worried	No	Yes	Yes	Yes	Yes	Never	Never	Never	Not worried	Worried	A little worried	Not hesitant	Strongly Agree	Yes	Strongly Agree	Strongly Agree	Yes	Agree	Disagree	Agree	Disagree	Disagree	Disagree	Agree	Disagree				Agree
427	19	Female	Married	Diploma	Primary	Private	Shenzhen Guangsheng Hospital	Nurse	1	No		No	Yes	No	No	No	A little worried	Worried	A little worried	Not worried	Not applicable	Not applicable	Not applicable	Not applicable	Don’t know							Not hesitant	Disagree	No	Strongly Agree	Strongly Agree	Yes	Agree	Strongly Disagree	Strongly Disagree	Strongly Disagree	Strongly Disagree	Agree	Disagree	Agree	Disagree	Agree	Disagree	Disagree
1319	56	Female	Unmarried	High school or others	None	Governmental	Baoan Shiyan People's Hospital	Cleaning staff	1	No		No	Yes	No	No	No	Not worried	Not worried	Not worried	Not worried	No	Yes	Yes	Yes	No							Somewhat hesitant	Strongly Agree	Yes	Strongly Agree	Strongly Agree	Yes	Strongly Disagree	Strongly Disagree	Disagree	Disagree	Disagree	Disagree	Agree	Disagree				Disagree
375	53	Female	Unmarried	Diploma	Primary	Governmental	Baoan Shiyan People's Hospital	Public health care physician	4	Yes		Yes	Yes	Yes	Yes	No	Worried	Worried	Worried	Not worried	Yes	Yes	Yes	Yes	Yes	Never	Never	Never	Not worried	Not worried	Not worried	Not hesitant	Agree	No	Strongly Agree	Strongly Agree	Yes	Agree	Agree	Agree	Strongly Agree	Agree	Agree	Agree	Agree	Disagree	Agree	Agree	Agree
573	65	Male	Unmarried	Diploma	Senior	Governmental	Baoan Shiyan People's Hospital	Medical /Laboratory Technician	4	No		No	No	No	No	Yes	Not applicable	Not applicable	Not applicable	Not applicable	Not applicable	Not applicable	Not applicable	Not applicable	Don’t know							Somewhat hesitant	Disagree	Don’t Know	Disagree	Disagree	Don’t Know	Disagree	Disagree	Disagree	Agree	Disagree	Agree	Agree	Agree	Disagree	Agree	Disagree	Disagree
396	51	Female	Unmarried	Bachelor	Senior	Governmental	Baoan Shiyan People's Hospital	Medical /Laboratory Technician	4	No	≥11	No	Yes	Yes	No	No	Worried	Very worried	Very worried	A little worried	Not applicable	Yes	Yes	Yes	Yes	Never	Never	Never	Worried	A little worried	Not worried	Very hesitant	Disagree	Don’t Know	Strongly Agree	Strongly Agree	Don’t Know	Agree	Agree	Agree	Agree	Disagree	Agree	Strongly Agree	Strongly Agree	Disagree	Agree	Agree	Disagree
566	26	Female	Married	Bachelor	Primary	Governmental	Baoan Shiyan People's Hospital	Medical /Laboratory Technician	1	No	0	No	Yes	Yes	No	No	Not applicable	Not applicable	Not applicable	Not applicable	No	Not applicable	Not applicable	Not applicable	Don’t know							Not hesitant	Strongly Agree	No	Strongly Agree	Strongly Agree	Don’t Know	Disagree	Strongly Disagree	Disagree	Disagree	Disagree	Disagree	Disagree	Agree	Disagree	Agree	Disagree	Disagree
370	28	Male	Married	Bachelor	Primary	Governmental	Baoan Shiyan People's Hospital	Dentist	2	No	1-5	No	Yes	Yes	No	No	Not worried	A little worried	A little worried	Not worried	Yes	Yes	Yes	Yes	No							A little hesitant	Agree	No	Strongly Agree	Strongly Agree	Don’t Know	Disagree	Disagree	Agree	Disagree	Disagree	Disagree	Disagree	Disagree				Disagree
454	26	Female	Married	Diploma	Primary	Governmental	Baoan Shiyan People's Hospital	Nurse	1	No	0	No	Yes	Yes	No	No	A little worried	Very worried	Worried	Not worried	No	Yes	No	Yes	Yes	Never	Never	Never	A little worried	A little worried	A little worried	Very hesitant	Disagree	Yes	Strongly Agree	Strongly Agree	Don’t Know	Agree	Disagree	Agree	Disagree	Agree	Agree	Strongly Agree	Strongly Agree	Disagree	Agree	Disagree	Disagree
617	50	Male	Unmarried	Bachelor	Senior	Governmental	Baoan Shiyan People's Hospital	Doctor	4	No	1-5	Yes	Yes	Yes	Yes	No	Not worried	Not worried	Not worried	Not worried	No	Yes	No	No	Yes	Never	Never	Never	Not worried	Not worried	Not worried	Not hesitant	Strongly Agree	Yes	Strongly Agree	Strongly Agree	Yes	Strongly Agree	Agree	Disagree	Strongly Disagree	Strongly Disagree	Strongly Disagree	Strongly Agree	Strongly Disagree				Strongly Disagree
557	36	Female	Unmarried	Bachelor	Intermediate	Governmental	Baoan Shiyan People's Hospital	Obstetrician and Gynecologist	2	No	0	Yes	Yes	Yes	Yes	No	Not worried	Not worried	A little worried	Not worried	Yes	No	No	No	No							A little hesitant	Agree	Yes	Strongly Agree	Strongly Agree	No	Agree	Disagree	Agree	Strongly Agree	Disagree	Agree	Disagree	Disagree				Strongly Disagree
730	41	Female	Unmarried	High school or others	None	Governmental	Baoan Shiyan People's Hospital	Cleaning staff	1	No		No	No	No	No	Yes	Not applicable	Not applicable	Not applicable	Not applicable	Not applicable	Not applicable	Not applicable	Not applicable	Don’t know							Very hesitant	Disagree	Don’t Know	Disagree	Strongly Agree	Don’t Know	Strongly Disagree	Strongly Disagree	Strongly Disagree	Strongly Disagree	Strongly Disagree	Agree	Agree	Disagree				Disagree
381	32	Female	Unmarried	Bachelor	Intermediate	Governmental	Baoan Shiyan People's Hospital	Nurse	2	No	1-5	Yes	Yes	Yes	Yes	No	A little worried	Worried	Very worried	A little worried	Not applicable	Yes	Yes	Yes	Yes	Several times	Once or twice	Never	Not worried	Not worried	Not worried	A little hesitant	Agree	Don’t Know	Strongly Agree	Strongly Agree	No	Strongly Agree	Agree	Agree	Disagree	Disagree	Disagree	Agree	Agree	Agree	Disagree	Disagree	Agree
626	28	Male	Unmarried	Bachelor	Primary	Governmental	Baoan Shiyan People's Hospital	Medical /Laboratory Technician	2	No	0	No	No	No	No	Yes	A little worried	Not applicable	Not applicable	Not applicable	No	Yes	Yes	Yes	No							A little hesitant	Strongly Agree	Don’t Know	Strongly Agree	Strongly Agree	Don’t Know	Disagree	Disagree	Disagree	Strongly Disagree	Strongly Disagree	Agree	Strongly Agree	Disagree				Disagree
560	50	Male	Unmarried	Bachelor	Senior	Governmental	Baoan Shiyan People's Hospital	Doctor	3	No		No	Yes	No	No	No	Worried	Very worried	Very worried	Worried	No	Yes	Yes	Yes	Yes	Once or twice	Never	Never	Not worried	A little worried	A little worried	Very hesitant	Disagree	Yes	Strongly Agree	Strongly Agree	Don’t Know	Strongly Agree	Disagree	Strongly Disagree	Strongly Agree	Strongly Agree	Strongly Agree	Strongly Agree	Agree	Agree	Agree	Disagree	Agree
738	61	Male	Unmarried	High school or others	None	Governmental	Baoan Shiyan People's Hospital	Cleaning staff	1	No		No	Yes	Yes	No	No	Worried	Worried	Worried	Worried	No	Yes	Yes	Yes	No							Somewhat hesitant	Agree	Yes	Strongly Agree	Strongly Agree	No	Disagree	Agree	Disagree	Agree	Agree	Agree	Agree	Strongly Agree	Disagree	Agree	Disagree	Strongly Agree
1364	28	Female	Married	Bachelor	Primary	Governmental	Baoan Shiyan People's Hospital	Obstetrician and Gynecologist	1	No	1-5	Yes	Yes	Yes	No	No	Worried	Very worried	Very worried	Not worried	No	Yes	No	Yes	No							Somewhat hesitant	Agree	Yes	Strongly Agree	Strongly Agree	Yes	Agree	Disagree	Disagree	Disagree	Disagree	Disagree	Agree	Disagree				Disagree
665	32	Male	Married	High school or others	Primary	Governmental	Baoan Shiyan People's Hospital	Cleaning staff	1	No	0	No	Yes	No	No	No	Not applicable	Not applicable	Not applicable	Not applicable	Not applicable	Not applicable	Not applicable	Not applicable	Don’t know							Very hesitant	Disagree	Don’t Know	Strongly Agree	Strongly Agree	Yes	Agree	Disagree	Agree	Disagree	Disagree	Disagree	Agree	Disagree				Disagree
605	50	Female	Unmarried	High school or others	None	Governmental	Baoan Shiyan People's Hospital	Nursing worker	1	No		Yes	Yes	Yes	Yes	No	Not worried	Not worried	Not worried	Not worried	No	No	No	Yes	Don’t know							Not hesitant	Strongly Agree	No	Strongly Agree	Strongly Agree	Yes	Disagree	Disagree	Disagree	Disagree	Disagree	Agree	Agree	Disagree				Disagree
366	31	Female	Unmarried	Bachelor	Intermediate	Governmental	Baoan Shiyan People's Hospital	Pharmacist	2	No		No	No	No	No	Yes	Not applicable	Not applicable	Not applicable	Not applicable	Not applicable	Not applicable	Not applicable	Not applicable	Don’t know							Somewhat hesitant	Disagree	Don’t Know	Disagree	Disagree	Don’t Know	Strongly Disagree	Strongly Disagree	Disagree	Disagree	Disagree	Disagree	Disagree	Disagree				Strongly Disagree
470	48	Female	Unmarried	Diploma	Primary	Governmental	Baoan Shiyan People's Hospital	Pharmacist	4	No		No	No	No	No	Yes	Not applicable	Not applicable	Not applicable	Not applicable	Not applicable	Not applicable	Not applicable	Not applicable	Don’t know							Somewhat hesitant	Disagree	Don’t Know	Strongly Agree	Strongly Agree	Yes	Strongly Agree	Disagree	Disagree	Disagree	Disagree	Disagree	Agree	Disagree				Disagree
372	45	Male	Unmarried	Master or higher	Senior	Governmental	Baoan Shiyan People's Hospital	Medical /Laboratory Technician	4	Yes	6-10	Yes	Yes	Yes	No	No	A little worried	A little worried	A little worried	A little worried	No	No	Yes	Yes	Yes	Never	Never	Never	Not worried	Not worried	Not worried	Not hesitant	Strongly Agree	Yes	Strongly Agree	Strongly Agree	Yes	Disagree	Disagree	Disagree	Disagree	Disagree	Strongly Agree	Agree	Disagree				Disagree
575	44	Female	Unmarried	Bachelor	Intermediate	Governmental	Baoan Shiyan People's Hospital	Obstetrician and Gynecologist	4	Yes	1-5	Yes	Yes	Yes	Yes	No	Not worried	A little worried	Not worried	Not worried	Not applicable	Yes	Yes	Yes	No							A little hesitant	Strongly Agree	Don’t Know	Strongly Agree	Strongly Agree	Yes	Strongly Agree	Disagree	Agree	Disagree	Disagree	Strongly Agree	Strongly Agree	Strongly Agree	Disagree	Agree	Disagree	Strongly Agree
561	32	Female	Married	Bachelor	Primary	Governmental	Baoan Shiyan People's Hospital	Medical /Laboratory Technician	2	No	0	No	Yes	Yes	Yes	No	A little worried	Worried	Worried	Not worried	No	No	Yes	Yes	Yes	Never	Never	Never	Not worried	Not worried	Not worried	Not hesitant	Disagree	Don’t Know	Strongly Agree	Strongly Agree	Don’t Know	Disagree	Strongly Disagree	Disagree	Disagree	Strongly Disagree	Disagree	Disagree	Disagree				Disagree
521	35	Male	Unmarried	Bachelor	Intermediate	Governmental	Baoan Shiyan People's Hospital	Doctor	2	No	1-5	No	Yes	Yes	No	No	Very worried	Very worried	Very worried	A little worried	Yes	No	Yes	Yes	Yes	Never	Never	Never	A little worried	A little worried	A little worried	A little hesitant	Agree	Yes	Agree	Strongly Agree	Yes	Strongly Agree	Agree	Agree	Agree	Agree	Agree	Strongly Agree	Strongly Agree	Agree	Disagree	Agree	Disagree
466	47	Male	Unmarried	Master or higher	Senior	Governmental	Baoan Shiyan People's Hospital	Doctor	4	No	0	Yes	Yes	Yes	No	No	Very worried	Very worried	Not worried	Not worried	Not applicable	Not applicable	Not applicable	Not applicable	Don’t know							Very hesitant	Disagree	Don’t Know	Disagree	Strongly Agree	Don’t Know	Disagree	Agree	Agree	Agree	Agree	Agree	Agree	Disagree				Disagree
463	35	Female	Unmarried	Bachelor	Intermediate	Governmental	Baoan Shiyan People's Hospital	Obstetrician and Gynecologist	2	No		Yes	Yes	Yes	No	No	A little worried	Worried	A little worried	Not worried	No	No	Yes	Yes	No							A little hesitant	Agree	Yes	Strongly Agree	Strongly Agree	Yes	Strongly Agree	Disagree	Disagree	Disagree	Disagree	Agree	Strongly Agree	Agree	Agree	Disagree	Disagree	Strongly Agree
668	46	Female	Unmarried	Bachelor	Senior	Governmental	Baoan Shiyan People's Hospital	Obstetrician and Gynecologist	4	No		Yes	Yes	Yes	No	No	Not worried	A little worried	A little worried	Not worried	No	No	Yes	No	Don’t know							A little hesitant	Strongly Agree	Yes	Strongly Agree	Strongly Agree	Yes	Agree	Disagree	Disagree	Disagree	Disagree	Disagree	Disagree	Agree	Agree	Agree	Disagree	Agree
736	32	Female	Unmarried	Bachelor	Intermediate	Governmental	Baoan Shiyan People's Hospital	Nurse	3	No		No	Yes	Yes	No	No	A little worried	Very worried	Very worried	Not worried	No	Yes	Yes	Yes	No							Not hesitant	Agree	Don’t Know	Strongly Agree	Strongly Agree	No	Strongly Agree	Disagree	Disagree	Disagree	Disagree	Agree	Agree	Disagree				Disagree
1017	50	Male	Unmarried	Diploma	Primary	Governmental	Baoan Shiyan People's Hospital	Pharmacist	4	No		No	No	Yes	No	No	Not worried	A little worried	A little worried	Not worried	No	Yes	Yes	No	No							Not hesitant	Agree	No	Agree	Strongly Agree	No	Disagree	Disagree	Disagree	Disagree	Disagree	Agree	Agree	Disagree				Disagree
362	28	Male	Unmarried	Bachelor	Primary	Governmental	Baoan Shiyan People's Hospital	Medical /Laboratory Technician	1	No	1-5	No	Yes	No	No	No	Not worried	Not applicable	Not applicable	Not applicable	No	Yes	Yes	Yes	Don’t know							Not hesitant	Disagree	No	Disagree	Disagree	Don’t Know	Disagree	Disagree	Disagree	Disagree	Disagree	Strongly Agree	Strongly Agree	Agree	Agree	Disagree	Agree	Disagree
363	33	Female	Unmarried	Master or higher	Intermediate	Governmental	Baoan Shiyan People's Hospital	Dentist	1	No	0	No	Yes	No	No	No	Not worried	A little worried	Worried	A little worried	Yes	No	Yes	No	Yes	Never	Never	Never	Not worried	Not worried	Not worried	Somewhat hesitant	Agree	Yes	Strongly Agree	Strongly Agree	Don’t Know	Disagree	Disagree	Strongly Disagree	Disagree	Strongly Disagree	Disagree	Disagree	Agree	Agree	Agree	Agree	Disagree
658	29	Female	Unmarried	Bachelor	Primary	Governmental	Baoan Shiyan People's Hospital	Nurse	2	No	1-5	No	Yes	No	No	No	Not worried	Very worried	Very worried	Not worried	No	No	Yes	Yes	Yes	Never	Never	Never	A little worried	A little worried	A little worried	A little hesitant	Strongly Agree	Don’t Know	Strongly Agree	Strongly Agree	No	Disagree	Disagree	Disagree	Disagree	Disagree	Disagree	Agree	Disagree				Disagree
574	25	Female	Unmarried	Diploma	Primary	Governmental	Baoan Shiyan People's Hospital	Receptionist	1	No	0	No	Yes	Yes	Yes	No	Very worried	Very worried	Very worried	Very worried	Yes	Yes	Yes	Yes	Don’t know							Not hesitant	Disagree	Don’t Know	Disagree	Disagree	Don’t Know	Disagree	Disagree	Disagree	Disagree	Disagree	Strongly Agree	Strongly Agree	Disagree				Disagree
581	29	Male	Married	Bachelor	Primary	Governmental	Baoan Shiyan People's Hospital	Medical /Laboratory Technician	1	No		No	No	No	No	Yes	Worried	Not applicable	Not applicable	Not applicable	Not applicable	Not applicable	Not applicable	Not applicable	Yes	Never	Never	Never	A little worried	Not worried	A little worried	A little hesitant	Disagree	Don’t Know	Disagree	Disagree	Don’t Know	Disagree	Disagree	Strongly Disagree	Agree	Agree	Agree	Strongly Agree	Agree	Disagree	Disagree	Agree	Disagree
473	35	Female	Unmarried	Master or higher	Intermediate	Governmental	Baoan Shiyan People's Hospital	Medical /Laboratory Technician	2	Yes		No	Yes	Yes	Yes	No	A little worried	Worried	A little worried	A little worried	Yes	Yes	Yes	Yes	Yes	Never	Never	Never	Not worried	Not worried	Not worried	A little hesitant	Agree	No	Strongly Agree	Strongly Agree	Yes	Agree	Agree	Strongly Disagree	Agree	Agree	Agree	Agree	Disagree				Disagree
445	32	Female	Married	Bachelor	Primary	Governmental	Baoan Shiyan People's Hospital	Nurse	2	No	1-5	No	Yes	Yes	No	No	A little worried	Worried	Worried	Not worried	No	Yes	Yes	Yes	Yes	Once or twice	Never	Never	Not worried	Not worried	Not worried	A little hesitant	Agree	No	Strongly Agree	Strongly Agree	Don’t Know	Strongly Agree	Disagree	Agree	Agree	Disagree	Agree	Agree	Disagree				Disagree
628	22	Female	Married	Diploma	None	Governmental	Baoan Shiyan People's Hospital	Receptionist	1	No	0	No	Yes	Yes	No	No	Not worried	A little worried	A little worried	Not worried	Not applicable	Not applicable	Yes	Not applicable	Yes	Never	Never	Never	Not worried	Not worried	Not worried	A little hesitant	Disagree	Don’t Know	Disagree	Strongly Agree	Don’t Know	Disagree	Disagree	Disagree	Disagree	Disagree	Agree	Agree	Agree	Disagree	Disagree	Agree	Strongly Disagree
572	23	Female	Married	Diploma	Primary	Governmental	Baoan Shiyan People's Hospital	Nurse	1	No		No	Yes	No	No	No	A little worried	A little worried	A little worried	A little worried	No	Yes	Yes	Yes	Don’t know							A little hesitant	Strongly Agree	Yes	Strongly Agree	Strongly Agree	Don’t Know	Agree	Disagree	Strongly Disagree	Disagree	Disagree	Agree	Strongly Agree	Disagree				Agree
434	23	Female	Married	Diploma	Primary	Governmental	Baoan Shiyan People's Hospital	Nurse	1	No	1-5	No	Yes	No	No	No	A little worried	Worried	Worried	Not worried	No	Yes	Yes	No	Yes	Never	Never	Never	Not worried	Not worried	Not worried	A little hesitant	Agree	No	Strongly Agree	Strongly Agree	Don’t Know	Disagree	Strongly Disagree	Strongly Disagree	Strongly Disagree	Strongly Disagree	Disagree	Disagree	Strongly Disagree				Strongly Disagree
556	31	Female	Unmarried	Bachelor	Primary	Governmental	Baoan Shiyan People's Hospital	Medical /Laboratory Technician	2	No	0	No	Yes	Yes	No	No	Not applicable	Not applicable	Not applicable	Not applicable	Not applicable	Not applicable	Not applicable	Not applicable	Yes	Never	Never	Once or twice	Not worried	Not worried	Not worried	A little hesitant	Disagree	Don’t Know	Disagree	Strongly Agree	Don’t Know	Agree	Strongly Disagree	Disagree	Disagree	Disagree	Agree	Agree	Disagree				Disagree
501	28	Female	Married	Bachelor	Primary	Governmental	Baoan Shiyan People's Hospital	Medical /Laboratory Technician	2	No		No	Yes	No	No	No	A little worried	Not applicable	Not applicable	Not applicable	Yes	Yes	Yes	No	Don’t know							Not hesitant	Disagree	Yes	Strongly Agree	Strongly Agree	Don’t Know	Agree	Disagree	Agree	Agree	Disagree	Disagree	Disagree	Agree	Disagree	Agree	Agree	Disagree
446	41	Female	Unmarried	Bachelor	Intermediate	Governmental	Baoan Shiyan People's Hospital	Nurse	4	No		Yes	Yes	Yes	Yes	No	A little worried	Worried	Worried	A little worried	No	Yes	Yes	No	No							A little hesitant	Agree	No	Strongly Agree	Strongly Agree	Yes	Agree	Agree	Disagree	Disagree	Disagree	Agree	Agree	Agree	Agree	Disagree	Agree	Disagree
538	37	Male	Unmarried	Master or higher	Senior	Governmental	Baoan Shiyan People's Hospital	Doctor	3	No		No	Yes	Yes	No	No	A little worried	A little worried	Not applicable	Not worried	Yes	No	Yes	No	No							Somewhat hesitant	Agree	Don’t Know	Agree	Strongly Agree	Don’t Know	Strongly Agree	Disagree	Disagree	Agree	Disagree	Agree	Agree	Disagree				Disagree
558	38	Female	Unmarried	Bachelor	Senior	Governmental	Baoan Shiyan People's Hospital	Nurse	4	No		No	Yes	Yes	No	No	A little worried	Very worried	Very worried	A little worried	Yes	Yes	Yes	Yes	Yes	Never	Never	Never	Not worried	Not worried	Not worried	Somewhat hesitant	Agree	No	Strongly Agree	Strongly Agree	Don’t Know	Disagree	Agree	Disagree	Disagree	Disagree	Strongly Agree	Agree	Disagree				Disagree
422	38	Female	Unmarried	Bachelor	Intermediate	Governmental	Baoan Shiyan People's Hospital	Nurse	3	No		No	Yes	Yes	No	No	Very worried	Not applicable	Very worried	Not worried	No	Yes	Yes	Yes	No							Somewhat hesitant	Disagree	Don’t Know	Strongly Agree	Strongly Agree	Don’t Know	Agree	Disagree	Disagree	Disagree	Strongly Disagree	Strongly Agree	Strongly Agree	Disagree				Disagree
930	36	Female	Unmarried	High school or others	Primary	Governmental	Baoan Shiyan People's Hospital	Cleaning staff	1	No		No	Yes	No	No	No	Not applicable	Not applicable	Not applicable	Not applicable	Not applicable	Not applicable	Not applicable	Not applicable	Don’t know							Somewhat hesitant	Disagree	Don’t Know	Disagree	Disagree	Don’t Know	Disagree	Disagree	Disagree	Disagree	Disagree	Disagree	Disagree	Disagree				Disagree
941	42	Male	Unmarried	Master or higher	Senior	Governmental	Baoan Shiyan People's Hospital	Doctor	3	No	1-5	No	Yes	No	Yes	No	A little worried	A little worried	A little worried	A little worried	No	Yes	Yes	Yes	Yes	Once or twice	Once or twice	Never	A little worried	A little worried	A little worried	A little hesitant	Agree	Don’t Know	Strongly Agree	Strongly Agree	Yes	Agree	Disagree	Disagree	Disagree	Disagree	Agree	Agree	Agree	Disagree	Disagree	Agree	Agree
467	24	Female	Married	Bachelor	Primary	Governmental	Baoan Shiyan People's Hospital	Nurse	1	No	0	No	Yes	Yes	No	No	Not worried	A little worried	A little worried	Not worried	No	Yes	Yes	No	Don’t know							Not hesitant	Strongly Agree	Don’t Know	Strongly Agree	Strongly Agree	Don’t Know	Disagree	Disagree	Disagree	Disagree	Disagree	Disagree	Disagree	Agree	Disagree	Agree	Disagree	Disagree
746	57	Female	Unmarried	High school or others	None	Governmental	Baoan Shiyan People's Hospital	Cleaning staff	1	No	6-10	No	Yes	Yes	No	No	Very worried	Worried	Worried	Not worried	Yes	Yes	Yes	Yes	No							Somewhat hesitant	Agree	Yes	Strongly Agree	Strongly Agree	No	Disagree	Agree	Disagree	Agree	Agree	Agree	Agree	Strongly Agree	Disagree	Agree	Disagree	Strongly Agree
606	25	Female	Married	Bachelor	Primary	Governmental	Baoan Shiyan People's Hospital	Nursing worker	1	No	0	No	No	No	No	Yes	A little worried	A little worried	Not worried	Not worried	No	No	Yes	Not applicable	Don’t know							A little hesitant	Strongly Agree	Don’t Know	Strongly Agree	Strongly Agree	Yes	Strongly Disagree	Disagree	Strongly Disagree	Disagree	Disagree	Strongly Agree	Strongly Agree	Disagree				Disagree
426	30	Female	Unmarried	Bachelor	Primary	Governmental	Baoan Shiyan People's Hospital	Nurse	2	No	1-5	Yes	Yes	Yes	No	No	Worried	Very worried	Very worried	Not worried	Yes	Yes	Yes	Yes	Yes	Never	Never	Never	Not worried	Not worried	Not worried	Not hesitant	Strongly Agree	Don’t Know	Strongly Agree	Strongly Agree	Yes	Strongly Agree	Disagree	Agree	Agree	Agree	Strongly Agree	Strongly Agree	Disagree				Disagree
459	50	Male	Unmarried	Bachelor	Senior	Governmental	Baoan Shiyan People's Hospital	Doctor	4	No		No	No	Yes	No	No	A little worried	Worried	Worried	A little worried	Yes	Yes	Yes	Yes	Yes	Once or twice	Once or twice	Never	A little worried	A little worried	A little worried	Somewhat hesitant	Agree	Yes	Agree	Strongly Agree	No	Agree	Agree	Agree	Agree	Disagree	Strongly Disagree	Agree	Agree	Agree	Disagree	Agree	Agree
587	40	Male	Unmarried	Bachelor	Intermediate	Governmental	Baoan Shiyan People's Hospital	Medical /Laboratory Technician	3	No	0	No	Yes	Yes	No	No	Not applicable	Not applicable	Not applicable	Not applicable	Not applicable	Not applicable	Not applicable	Not applicable	Don’t know							A little hesitant	Disagree	Don’t Know	Disagree	Disagree	Don’t Know	Disagree	Disagree	Disagree	Disagree	Disagree	Disagree	Disagree	Disagree				Disagree
597	38	Male	Unmarried	Bachelor	Senior	Governmental	Baoan Shiyan People's Hospital	Medical /Laboratory Technician	3	Yes	1-5	Yes	Yes	Yes	No	No	A little worried	Worried	Worried	Not worried	Yes	No	No	Yes	Yes	Never	Never	Never	A little worried	A little worried	Not worried	Somewhat hesitant	Strongly Agree	Yes	Strongly Agree	Strongly Agree	Yes	Agree	Disagree	Disagree	Disagree	Disagree	Agree	Strongly Agree	Strongly Agree	Disagree	Agree	Disagree	Disagree
745	50	Female	Unmarried	Master or higher	Senior	Governmental	Baoan Shiyan People's Hospital	Doctor	4	No	6-10	No	Yes	Yes	No	No	Not worried	Worried	Worried	Not worried	No	No	Yes	Yes	No							Not hesitant	Strongly Agree	Yes	Disagree	Strongly Agree	No	Disagree	Strongly Disagree	Disagree	Disagree	Disagree	Strongly Agree	Agree	Disagree				Strongly Disagree
622	34	Female	Unmarried	Bachelor	Intermediate	Governmental	Baoan Shiyan People's Hospital	Nurse	3	No	1-5	No	Yes	No	No	No	A little worried	Worried	Worried	A little worried	No	Yes	Yes	Not applicable	Yes	Once or twice	Once or twice	Once or twice	Not worried	Not worried	Not worried	Not hesitant	Agree	Don’t Know	Strongly Agree	Strongly Agree	No	Disagree	Disagree	Disagree	Disagree	Disagree	Agree	Agree	Disagree				Disagree
526	28	Female	Unmarried	Bachelor	Primary	Governmental	Baoan Shiyan People's Hospital	Nurse	1	No	0	No	Yes	No	No	No	Very worried	Very worried	Very worried	Not worried	Yes	Yes	Yes	Yes	Yes	Once or twice	Never	Never	A little worried	A little worried	Very worried	Somewhat hesitant	Disagree	Yes	Disagree	Strongly Agree	Don’t Know	Agree	Disagree	Agree	Agree	Strongly Disagree	Agree	Agree	Strongly Agree	Agree	Disagree	Disagree	Agree
373	33	Male	Unmarried	Bachelor	Intermediate	Governmental	Baoan Shiyan People's Hospital	Obstetrician and Gynecologist	2	Yes	1-5	Yes	Yes	Yes	Yes	No	Not worried	A little worried	A little worried	Not worried	Yes	Yes	Yes	No	No							Somewhat hesitant	Strongly Agree	Don’t Know	Strongly Agree	Strongly Agree	Yes	Disagree	Strongly Disagree	Disagree	Disagree	Strongly Disagree	Agree	Agree	Disagree				Disagree
1369	37	Male	Unmarried	Bachelor	Intermediate	Governmental	Baoan Shiyan People's Hospital	Doctor	3	No		No	Yes	No	No	No	A little worried	A little worried	A little worried	Not worried	Yes	Yes	Yes	Yes	Yes	Never	Never	Never	A little worried	A little worried	A little worried	A little hesitant	Strongly Agree	Don’t Know	Disagree	Strongly Agree	Yes	Strongly Agree	Disagree	Agree	Agree	Agree	Agree	Strongly Agree	Agree	Agree	Agree	Agree	Agree
486	23	Female	Married	Diploma	Primary	Governmental	Baoan Shiyan People's Hospital	Nurse	1	No	0	No	Yes	Yes	No	No	Not worried	Worried	A little worried	Not worried	No	Not applicable	Not applicable	No	Don’t know							A little hesitant	Agree	Don’t Know	Strongly Agree	Strongly Agree	Yes	Disagree	Disagree	Disagree	Disagree	Disagree	Agree	Disagree	Disagree				Disagree
570	30	Female	Unmarried	Bachelor	Intermediate	Governmental	Baoan Shiyan People's Hospital	Medical /Laboratory Technician	3	No		No	Yes	Yes	No	No	Not applicable	Not applicable	Not applicable	Not applicable	Not applicable	Not applicable	Not applicable	Not applicable	Don’t know							Very hesitant	Agree	Yes	Disagree	Strongly Agree	Yes	Agree	Disagree	Strongly Disagree	Strongly Disagree	Agree	Strongly Agree	Agree	Disagree				Disagree
464	26	Female	Married	High school or others	Intermediate	Governmental	Baoan Shiyan People's Hospital	Nurse	2	No	1-5	No	Yes	No	No	No	Not worried	A little worried	A little worried	Not worried	No	No	No	No	Don’t know							Not hesitant	Strongly Agree	Yes	Strongly Agree	Strongly Agree	Yes	Disagree	Disagree	Disagree	Disagree	Disagree	Disagree	Agree	Disagree				Disagree
1330	53	Female	Unmarried	High school or others	None	Governmental	Baoan Shiyan People's Hospital	Cleaning staff	1	No	0	No	Yes	No	No	No	Not applicable	Not applicable	Not applicable	Not applicable	Not applicable	Yes	Yes	Yes	No							A little hesitant	Disagree	Don’t Know	Strongly Agree	Strongly Agree	Yes	Disagree	Disagree	Disagree	Agree	Disagree	Disagree	Disagree	Agree	Disagree	Agree	Agree	Disagree
1339	62	Female	Unmarried	High school or others	None	Governmental	Baoan Shiyan People's Hospital	Cleaning staff	1	No		No	Yes	No	No	No	A little worried	Not applicable	Not applicable	Not applicable	No	Yes	Yes	Yes	Yes	Never	Never	Never	A little worried	A little worried	A little worried	A little hesitant	Strongly Agree	Yes	Strongly Agree	Strongly Agree	Yes	Disagree	Disagree	Disagree	Disagree	Disagree	Agree	Agree	Disagree				Agree
694	31	Female	Unmarried	Diploma	Primary	Governmental	Baoan Shiyan People's Hospital	Nurse	3	Yes		Yes	Yes	Yes	Yes	No	Not worried	Very worried	Very worried	Not worried	No	Yes	No	Yes	Don’t know							Not hesitant	Agree	No	Strongly Agree	Strongly Agree	Yes	Disagree	Disagree	Disagree	Disagree	Disagree	Agree	Agree	Disagree				Disagree
1336	62	Male	Unmarried	High school or others	None	Governmental	Baoan Shiyan People's Hospital	Cleaning staff	1	No		No	Yes	No	No	No	Not applicable	Not applicable	Not applicable	Not applicable	Not applicable	Not applicable	Not applicable	Not applicable	No							A little hesitant	Disagree	Don’t Know	Strongly Agree	Strongly Agree	Yes	Disagree	Disagree	Disagree	Disagree	Disagree	Agree	Strongly Disagree	Agree	Disagree	Agree	Disagree	Disagree
399	28	Male	Unmarried	Master or higher	Primary	Governmental	Baoan Shiyan People's Hospital	Doctor	1	No	1-5	No	Yes	No	No	No	Not worried	A little worried	A little worried	Not worried	No	Yes	Yes	Yes	Yes	Once or twice	Never	Once or twice	Not worried	Not worried	Not worried	A little hesitant	Agree	Yes	Strongly Agree	Strongly Agree	Yes	Disagree	Disagree	Disagree	Agree	Disagree	Disagree	Strongly Agree	Strongly Agree	Agree	Agree	Agree	Strongly Disagree
479	33	Female	Unmarried	Bachelor	Primary	Governmental	Baoan Shiyan People's Hospital	Medical /Laboratory Technician	3	No		No	Yes	Yes	No	No	Not applicable	Not applicable	Not applicable	Not applicable	No	Yes	Yes	No	Yes	Never	Never	Never	A little worried	Not worried	Not worried	A little hesitant	Disagree	Don’t Know	Strongly Agree	Strongly Agree	Don’t Know	Agree	Agree	Agree	Agree	Disagree	Agree	Strongly Agree	Agree	Disagree	Agree	Agree	Disagree
457	31	Female	Unmarried	Bachelor	Primary	Governmental	Baoan Shiyan People's Hospital	Nurse	2	No		No	Yes	Yes	No	No	Not worried	A little worried	A little worried	Not worried	No	No	Yes	No	Yes	Never	Never	Never	Not worried	Not worried	Not worried	Not hesitant	Disagree	Don’t Know	Strongly Agree	Strongly Agree	Don’t Know	Agree	Strongly Disagree	Strongly Disagree	Strongly Disagree	Strongly Disagree	Strongly Disagree	Strongly Disagree	Disagree				Disagree
600	23	Female	Married	Diploma	Primary	Governmental	Baoan Shiyan People's Hospital	Nurse	1	No		Yes	Yes	No	No	Yes	Not applicable	Worried	Worried	Worried	Not applicable	Yes	Yes	Yes	Don’t know							Very hesitant	Disagree	Don’t Know	Disagree	Disagree	Don’t Know	Strongly Disagree	Agree	Agree	Agree	Strongly Disagree	Strongly Agree	Strongly Agree	Strongly Agree	Agree	Agree	Agree	Disagree
968	49	Female	Unmarried	High school or others	None	Governmental	Baoan Shiyan People's Hospital	Nursing worker	1	No	0	No	No	Yes	No	No	Not applicable	A little worried	Worried	Not worried	Not applicable	Yes	Yes	Yes	Yes	Never	Never	Never	Not worried	A little worried	A little worried	A little hesitant	Agree	Don’t Know	Strongly Agree	Strongly Agree	Yes	Strongly Disagree	Strongly Disagree	Strongly Disagree	Strongly Disagree	Strongly Disagree	Strongly Disagree	Strongly Agree	Strongly Disagree				Strongly Disagree
547	37	Male	Unmarried	Master or higher	Intermediate	Governmental	Baoan Shiyan People's Hospital	Doctor	2	No		Yes	Yes	Yes	Yes	No	A little worried	Worried	Very worried	Not worried	No	Yes	Yes	Yes	Don’t know							A little hesitant	Strongly Agree	Yes	Strongly Agree	Strongly Agree	Yes	Agree	Disagree	Strongly Disagree	Disagree	Disagree	Agree	Strongly Agree	Disagree				Disagree
889	28	Female	Unmarried	Diploma	Primary	Governmental	Baoan Shiyan People's Hospital	Nurse	2	No		No	Yes	Yes	No	No	Not worried	Worried	A little worried	Not worried	Yes	No	Yes	Yes	No							A little hesitant	Disagree	Don’t Know	Strongly Agree	Strongly Agree	No	Disagree	Agree	Agree	Disagree	Disagree	Disagree	Agree	Disagree				Disagree
386	29	Female	Married	Bachelor	Primary	Governmental	Baoan Shiyan People's Hospital	Midwife	2	No		No	Yes	Yes	No	No	A little worried	A little worried	A little worried	Not worried	No	Yes	Yes	Yes	No							Somewhat hesitant	Agree	Don’t Know	Strongly Agree	Strongly Agree	Yes	Disagree	Disagree	Disagree	Disagree	Disagree	Agree	Agree	Agree	Agree	Agree	Disagree	Disagree
785	51	Male	Unmarried	High school or others	None	Governmental	Baoan Shiyan People's Hospital	Nursing worker	1	No		No	No	Yes	No	No	Not applicable	Not applicable	Not worried	Not worried	No	Yes	Yes	Yes	Yes	Never	Never	Never	Not worried	Not worried	Not worried	Not hesitant	Strongly Agree	Don’t Know	Strongly Agree	Disagree	Yes	Strongly Disagree	Disagree	Disagree	Strongly Disagree	Strongly Disagree	Agree	Agree	Disagree				Disagree
512	49	Female	Unmarried	Bachelor	Intermediate	Governmental	Baoan Shiyan People's Hospital	Obstetrician and Gynecologist	4	No		Yes	Yes	Yes	Yes	No	A little worried	A little worried	A little worried	A little worried	No	Yes	Yes	Yes	Yes	Never	Never	Never	Not worried	Not worried	Not worried	Not hesitant	Strongly Agree	Yes	Strongly Agree	Strongly Agree	Yes	Disagree	Disagree	Disagree	Disagree	Disagree	Agree	Agree	Disagree				Disagree
1335	52	Female	Unmarried	High school or others	None	Private	Shenzhen Tianlun Hospital	Cleaning staff	1	No		No	Yes	No	No	No	Not applicable	Not applicable	Not applicable	Not applicable	Not applicable	Not applicable	Not applicable	Not applicable	No							A little hesitant	Disagree	Don’t Know	Disagree	Strongly Agree	Yes	Disagree	Disagree	Disagree	Disagree	Disagree	Disagree	Strongly Disagree	Agree	Agree	Disagree	Disagree	Disagree
33	55	Female	Unmarried	Bachelor	Senior	Private	Shenzhen Tianlun Hospital	Obstetrician and Gynecologist	4	No	1-5	No	Yes	Yes	Yes	No	Not worried	Not worried	Very worried	Not worried	No	Yes	No	Yes	No							A little hesitant	Strongly Agree	Yes	Strongly Agree	Strongly Agree	Yes	Strongly Agree	Strongly Disagree	Strongly Agree	Agree	Agree	Strongly Agree	Strongly Agree	Strongly Agree	Agree	Agree	Disagree	Agree
78	33	Female	Unmarried	Diploma	Intermediate	Private	Shenzhen Tianlun Hospital	Medical /Laboratory Technician	3	No	6-10	Yes	Yes	Yes	Yes	No	Very worried	Very worried	Very worried	Worried	No	Yes	Yes	Yes	Yes	Never	Never	Never	Worried	Worried	Worried	Not hesitant	Strongly Agree	Yes	Strongly Agree	Strongly Agree	Yes	Disagree	Disagree	Disagree	Disagree	Disagree	Agree	Agree	Strongly Disagree				Strongly Disagree
81	26	Female	Married	Diploma	None	Private	Shenzhen Tianlun Hospital	Medical /Laboratory Technician	1	No		Yes	Yes	Yes	Yes	Yes	Worried	Very worried	Very worried	Worried	Yes	Yes	Yes	Yes	No							Not hesitant	Strongly Agree	Don’t Know	Strongly Agree	Strongly Agree	Don’t Know	Disagree	Strongly Disagree	Strongly Disagree	Strongly Disagree	Strongly Disagree	Disagree	Agree	Strongly Disagree				Strongly Disagree
42	23	Female	Married	Diploma	Primary	Private	Shenzhen Tianlun Hospital	Nurse	1	No	1-5	No	Yes	Yes	No	No	Very worried	Very worried	Very worried	A little worried	No	No	No	Yes	Yes	Never	Never	Never	Not worried	Not worried	Not worried	A little hesitant	Strongly Agree	Yes	Strongly Agree	Strongly Agree	Yes	Disagree	Disagree	Disagree	Disagree	Disagree	Disagree	Disagree	Disagree				Disagree
229	35	Female	Unmarried	Diploma	Primary	Private	Shenzhen Tianlun Hospital	Obstetrician and Gynecologist	2	No		Yes	Yes	Yes	No	No	Worried	Very worried	Very worried	Very worried	No	Yes	Yes	Yes	No							Very hesitant	Agree	Yes	Strongly Agree	Strongly Agree	Yes	Agree	Disagree	Disagree	Agree	Disagree	Agree	Agree	Agree	Agree	Disagree	Disagree	Agree
27	59	Female	Unmarried	Diploma	Senior	Private	Shenzhen Tianlun Hospital	Public health care physician	4	No	0	Yes	Yes	Yes	Yes	No	A little worried	Very worried	Worried	Not worried	No	No	Yes	No	No							Somewhat hesitant	Strongly Agree	Yes	Strongly Agree	Strongly Agree	Yes	Disagree	Disagree	Agree	Disagree	Disagree	Agree	Agree	Agree	Agree	Agree	Agree	Agree
34	26	Female	Married	Diploma	None	Private	Shenzhen Tianlun Hospital	Cashier	1	No		Yes	Yes	Yes	Yes	No	A little worried	Worried	Worried	A little worried	Yes	Yes	Yes	Yes	Yes	Never	Never	Never	Not worried	A little worried	Not worried	Very hesitant	Agree	Yes	Strongly Agree	Strongly Agree	Yes	Disagree	Disagree	Agree	Strongly Agree	Agree	Disagree	Strongly Agree	Disagree				Disagree
[truncated: 160 more rows]
[truncated: 18 more columns]
